# Supplementary material for: Association with TFIIIC limits MYCN localisation in hubs of active promoters and chromatin accumulation of non-phosphorylated RNA polymerase II
Source: eLife journal article supplement (doi:10.7554/elife.94407), 2024-02-07
Supplement: fig1-data5 [file Figure1B-SEC.xlsx]

## Sheet: Sheet1
𝛕A-N-myc 1-37 together			N-myc 1-137 alone
Black curve			Red curve
Vol (mL)	A280 (mAU)		Vol (mL)	A280 (mAU)
0.000588	7.51304		-0.0017061	1.13139
0.010584	12.9127		0.0032915	-0.0013535
0.0205798	18.563		0.0082892	-0.003687
0.0305758	18.5441		0.0132868	-0.0064465
0.0405716	18.461		0.0182845	-0.010651
0.0505676	18.3253		0.0232821	-0.0100314
0.0605634	18.1114		0.0282798	-0.0113004
0.0705593	17.6845		0.0332774	-0.0085921
0.0805552	16.7202		0.038275	-0.0071495
0.0905512	12.8254		0.0432727	-0.00351
0.100547	6.97465		0.0482702	-0.0020997
0.110543	1.44949		0.053268	-0.0006802
0.120539	0.345239		0.0582656	0.0064128
0.130535	1.31795		0.0632632	0.0635688
0.140531	1.02781		0.0682609	0.105708
0.150527	-1.32878		0.0732585	0.130005
0.160522	-3.1978		0.0782561	0.142717
0.170518	-4.24714		0.0832538	0.15414
0.180514	-5.38023		0.0882514	0.164017
0.19051	-7.0077		0.093249	0.185909
0.200506	-8.91785		0.0982468	0.214067
0.210502	-5.59844		0.103244	0.244919
0.220498	-1.31961		0.108242	0.260338
0.230494	-2.60155		0.11324	0.225047
0.24049	-3.75054		0.118237	0.187841
0.250485	-4.77915		0.123235	0.160585
0.260481	-5.71192		0.128233	0.139734
0.270477	-6.56027		0.13323	0.12972
0.280473	-7.32527		0.138228	0.12807
0.290469	-8.01011		0.143226	0.133841
0.300465	-8.62145		0.148223	0.142181
0.310461	-6.74211		0.153221	0.151705
0.320457	-0.357945		0.158218	0.165626
0.330453	-0.789466		0.163216	0.175536
0.340448	-1.16424		0.168214	0.167086
0.350444	-1.48038		0.173211	0.154738
0.36044	-1.7526		0.178209	0.143629
0.370436	-1.99014		0.183207	0.123872
0.380432	-2.1937		0.188204	0.101879
0.390428	-2.36129		0.193202	0.0906625
0.400424	-2.50669		0.198199	0.0819279
0.41042	-2.63621		0.203197	0.078008
0.420416	-2.75296		0.208195	0.0733812
0.430412	-1.54838		0.213192	0.0678511
0.440408	-0.0795992		0.21819	0.0629059
0.450403	-0.150633		0.223188	0.0542877
0.460399	-0.219676		0.228185	0.0421099
0.470395	-0.286446		0.233183	0.029662
0.480391	-0.346373		0.238181	0.0187227
0.490387	-0.401499		0.243178	0.0103061
0.500383	-0.340274		0.248176	0.0056369
0.510379	-0.0440905		0.253173	0.0019704
0.520375	-0.0944935		0.258171	0.0033773
0.530371	-0.144599		0.263169	0.0041799
0.540366	-0.192914		0.268166	0.0136683
0.550362	-0.241554		0.273164	0.0240451
0.560358	-0.289479		0.278162	0.0186638
0.570354	-0.33795		0.283159	0.010641
0.58035	-0.381089		0.288157	0.0057434
0.590346	-0.420912		0.293155	-0.0072561
0.600342	-0.463205		0.298152	-0.020949
0.610338	-0.132528		0.30315	-0.0214141
0.620334	-0.0533093		0.308148	-0.0214128
0.630329	-0.0936475		0.313145	-0.0238249
0.640325	-0.135894		0.318143	-0.0310561
0.650321	-0.174935		0.32314	-0.0385283
0.660317	-0.211861		0.328138	-0.0450994
0.670313	-0.249212		0.333136	-0.0529701
0.680309	-0.292579		0.338133	-0.0578858
0.690305	-0.333289		0.343131	-0.0575237
0.700301	-0.371226		0.348129	-0.0561181
0.710297	-0.406296		0.353126	-0.0565392
0.720293	-0.441591		0.358124	-0.0577464
0.730288	-0.472379		0.363122	-0.0597448
0.740284	-0.50358		0.368119	-0.0610607
0.75028	-0.53847		0.373117	-0.0605684
0.760276	-0.434535		0.378115	-0.0576933
0.770272	-0.0231299		0.383112	-0.0524551
0.780268	-0.0506529		0.38811	-0.0520488
0.790264	-0.0784439		0.393107	-0.0544191
0.80026	-0.111919		0.398105	-0.059465
0.810256	-0.143504		0.403103	-0.0672083
0.820251	-0.169308		0.4081	-0.0766903
0.830247	-0.19461		0.413098	-0.081498
0.840243	-0.121696		0.418096	-0.0835081
0.850239	-0.0294075		0.423093	-0.0836642
0.860235	-0.0570444		0.428091	-0.0818953
0.870231	-0.0846913		0.433089	-0.0816166
0.880227	-0.109123		0.438086	-0.081883
0.890223	-0.133011		0.443084	-0.0835055
0.900219	-0.155482		0.448081	-0.0879334
0.910215	-0.172031		0.453079	-0.091654
0.92021	-0.012157		0.458077	-0.0906877
0.930206	-0.0305598		0.463074	-0.0914523
0.940202	-0.0530254		0.468072	-0.0906187
0.950198	-0.0743716		0.47307	-0.0897234
0.960194	-0.0947641		0.478067	-0.0878586
0.97019	-0.112191		0.483065	-0.0914688
0.980186	-0.13168		0.488063	-0.0915172
0.990182	-0.150111		0.49306	-0.0932373
1.00018	-0.168286		0.498058	-0.0958644
1.01017	-0.185482		0.503056	-0.0978179
1.02017	-0.203273		0.508053	-0.0963264
1.03017	-0.220924		0.513051	-0.0964463
1.04016	-0.238355		0.518049	-0.0961786
1.05016	-0.253991		0.523046	-0.0932434
1.06015	-0.270406		0.528044	-0.0944522
1.07015	-0.286011		0.533041	-0.0945109
1.08014	-0.30274		0.538039	-0.0954577
1.09014	-0.314697		0.543037	-0.0966204
1.10014	-0.331107		0.548034	-0.0977695
1.11013	-0.346012		0.553032	-0.0963079
1.12013	-0.360632		0.55803	-0.0977546
1.13012	-0.369945		0.563027	-0.0973263
1.14012	-0.383419		0.568025	-0.0968336
1.15012	-0.395414		0.573022	-0.0985328
1.16011	-0.150512		0.57802	-0.100832
1.17011	-0.0100655		0.583018	-0.10095
1.1801	-0.0196058		0.588015	-0.101045
1.1901	-0.0325636		0.593013	-0.100819
1.2001	-0.0455584		0.598011	-0.0993958
1.21009	-0.0582762		0.603008	-0.0980331
1.22009	-0.0710015		0.608006	-0.0989098
1.23008	-0.0816514		0.613004	-0.102643
1.24008	-0.0877507		0.618001	-0.103914
1.25008	-0.0980886		0.622999	-0.103563
1.26007	-0.106769		0.627997	-0.105808
1.27007	-0.115582		0.632994	-0.105066
1.28006	-0.122972		0.637992	-0.101701
1.29006	-0.128684		0.642989	-0.100333
1.30005	-0.130814		0.647987	-0.0304185
1.31005	-0.0259661		0.652985	0.0027067
1.32005	-0.0119371		0.657982	0.0056506
1.33004	-0.0218717		0.66298	0.0049954
1.34004	-0.0306908		0.667978	0.0056863
1.35003	-0.0353715		0.672975	0.0052082
1.36003	-0.0379515		0.677973	0.0054899
1.37003	-0.0375499		0.682971	0.0028268
1.38002	-0.0443246		0.687968	0.0043375
1.39002	-0.054102		0.692966	0.0027758
1.40001	-0.0647358		0.697963	0.0050607
1.41001	-0.0691977		0.702961	0.0038239
1.42001	-0.074074		0.707959	0.005575
1.43	-0.0784293		0.712956	0.0075483
1.44	-0.0798546		0.717954	0.0091965
1.44999	-0.0799493		0.722952	0.0055957
1.45999	-0.0842508		0.727949	0.0051485
1.46998	-0.0893539		0.732947	0.004233
1.47998	-0.101548		0.737945	0.0020839
1.48998	-0.0825457		0.742942	0.0019331
1.49997	0.0031874		0.74794	0.0027484
1.50997	0.004484		0.752938	0.0026314
1.51996	0.0008334		0.757935	0.0039524
1.52996	-0.0046144		0.762933	0.000635
1.53996	-0.006806		0.76793	-0.0008695
1.54995	-0.0111426		0.772928	0.0001734
1.55995	-0.0208635		0.777926	0.0012013
1.56994	-0.0270936		0.782923	0.0010106
1.57994	-0.027133		0.787921	0.0035316
1.58994	-0.0250298		0.792919	0.0041167
1.59993	-0.0286564		0.797916	0.0044526
1.60993	-0.0337246		0.802914	0.00506
1.61992	-0.0372989		0.807912	0.0031842
1.62992	-0.0385801		0.812909	0.0018305
1.63991	-0.0382461		0.817907	0.0013842
1.64991	-0.0371393		0.822904	0.0011501
1.65991	-0.0377878		0.827902	0.0015294
1.6699	-0.0411391		0.8329	0.0028345
1.6799	-0.0440291		0.837897	0.0058885
1.68989	-0.0469073		0.842895	0.0059385
1.69989	-0.0489927		0.847893	0.0050941
1.70989	-0.0494537		0.85289	0.0051048
1.71988	-0.0532109		0.857888	0.0049379
1.72988	-0.0547613		0.862886	0.0023641
1.73987	-0.0572474		0.867883	0.0017631
1.74987	-0.0574		0.872881	0.0002941
1.75987	-0.0559875		0.877879	-0.0008611
1.76986	-0.0541318		0.882876	-0.0003633
1.77986	-0.0568775		0.887874	0.0024423
1.78985	-0.0616256		0.892872	0.0020822
1.79985	-0.0618786		0.897869	0.0029039
1.80985	-0.0583288		0.902867	0.0039475
1.81984	-0.0648151		0.907864	0.0018866
1.82984	-0.0677687		0.912862	-0.0031274
1.83983	-0.069619		0.91786	-0.002099
1.84983	-0.0704405		0.922857	-0.0022367
1.85982	-0.0065129		0.927855	-0.0060349
1.86982	0.0029928		0.932853	-0.0042176
1.87982	0.0014422		0.93785	0.000908
1.88981	-0.0021015		0.942848	0.0016059
1.89981	-0.0008165		0.947846	0.0026276
1.9098	0.0034978		0.952843	0.0066545
1.9198	0.0042588		0.957841	0.0066775
1.9298	0.002801		0.962838	0.0053699
1.93979	0.0016984		0.967836	0.0055288
1.94979	-0.0035774		0.972834	0.0062012
1.95978	-0.009475		0.977831	0.0062124
1.96978	-0.0062647		0.982829	0.0048694
1.97978	-0.0025836		0.987827	0.0048506
1.98977	-0.0010489		0.992824	0.0062439
1.99977	-0.0019455		0.997822	0.0044401
2.00976	-0.0052836		1.00282	0.0045575
2.01976	-0.0091263		1.00782	0.005044
2.02975	-0.0086755		1.01281	0.0042308
2.03975	-0.0045177		1.01781	0.0017411
2.04975	0.0015041		1.02281	0.0019663
2.05974	0.0028524		1.02781	0.0018863
2.06974	-0.0021908		1.03281	0.0014799
2.07973	-0.0066321		1.0378	0.0012755
2.08973	-0.0045726		1.0428	0.0014874
2.09973	-0.0054285		1.0478	0.0017253
2.10972	-0.0076145		1.0528	-0.0007035
2.11972	-0.008032		1.05779	-0.0007366
2.12971	-0.0093127		1.06279	-0.0007761
2.13971	-0.012778		1.06779	-0.0015011
2.14971	-0.0139896		1.07279	-0.0015568
2.1597	-0.0121801		1.07778	0.0013603
2.1697	-0.0056616		1.08278	0.003153
2.17969	-0.0065406		1.08778	0.0044794
2.18969	-0.0119589		1.09278	0.004882
2.19969	-0.0117737		1.09777	0.0027036
2.20968	-0.0094968		1.10277	0.0021394
2.21968	-0.007931		1.10777	0.0029309
2.22967	-0.0075631		1.11277	0.0035068
2.23967	-0.005305		1.11777	0.0055787
2.24966	-0.0048696		1.12276	0.0093795
2.25966	-0.0037927		1.12776	0.0092382
2.26966	-0.0071222		1.13276	0.0085084
2.27965	-0.0125695		1.13776	0.0069813
2.28965	-0.0134346		1.14275	0.0055482
2.29964	-0.012549		1.14775	0.0050365
2.30964	-0.0067444		1.15275	0.0058276
2.31964	-0.006482		1.15775	0.0064342
2.32963	-0.0076295		1.16274	0.0081248
2.33963	-0.010685		1.16774	0.0076741
2.34962	-0.0122867		1.17274	0.0089047
2.35962	-0.0108471		1.17774	0.0089186
2.36962	-0.0081117		1.18273	0.0069499
2.37961	-0.0092027		1.18773	0.006276
2.38961	-0.0098771		1.19273	0.0057963
2.3996	-0.0060999		1.19773	0.0051903
2.4096	-0.0021444		1.20273	0.0048036
2.41959	-0.0005764		1.20772	0.0075962
2.42959	0.0001214		1.21272	0.0056867
2.43959	-0.0002674		1.21772	0.0060851
2.44958	0.0003505		1.22272	0.0057698
2.45958	0.0013787		1.22771	0.0048858
2.46957	0.0030856		1.23271	0.0043936
2.47957	0.0027995		1.23771	0.0075007
2.48957	0.0026851		1.24271	0.006807
2.49956	-0.0004987		1.2477	0.0060674
2.50956	-0.0030504		1.2527	0.0060223
2.51955	-0.0031679		1.2577	0.0038208
2.52955	0.0012313		1.2627	0.0018686
2.53955	0.0023959		1.26769	0.003009
2.54954	0.0026859		1.27269	0.0039384
2.55954	0.0050518		1.27769	0.0047387
2.56953	0.0044204		1.28269	0.0057654
2.57953	0.0021257		1.28769	0.0075185
2.58953	-0.0012664		1.29268	0.0089058
2.59952	-0.0028598		1.29768	0.0119152
2.60952	-0.0023304		1.30268	0.0108956
2.61951	-0.0017494		1.30768	0.0083827
2.62951	-0.000529		1.31267	0.0056544
2.6395	0.0015155		1.31767	0.0047674
2.6495	0.0032913		1.32267	0.003957
2.6595	0.00401		1.32767	0.0059234
2.66949	0.0068122		1.33266	0.0086843
2.67949	0.0067219		1.33766	0.0114466
2.68948	0.0072954		1.34266	0.0132842
2.69948	0.0055455		1.34766	0.0132176
2.70948	0.0052324		1.35265	0.0135327
2.71947	0.005238		1.35765	0.0149554
2.72947	0.0056569		1.36265	0.0140792
2.73946	0.003439		1.36765	0.0139562
2.74946	0.0078475		1.37264	0.0092687
2.75946	0.0083088		1.37764	0.0080884
2.76945	0.0110641		1.38264	0.0076321
2.77945	0.0086687		1.38764	0.0098332
2.78944	0.0109026		1.39264	0.0082453
2.79944	0.0127466		1.39763	0.0124828
2.80943	0.0117661		1.40263	0.0121969
2.81943	0.0051623		1.40763	0.01178
2.82943	0.0097587		1.41263	0.0090201
2.83942	0.0133329		1.41762	0.0070975
2.84942	0.0119632		1.42262	0.0020092
2.85941	0.009277		1.42762	0.0007695
2.86941	0.0143954		1.43262	-0.0004933
2.87941	0.0171378		1.43761	-0.000162
2.8894	0.016491		1.44261	0.002914
2.8994	0.0145466		1.44761	0.0077512
2.90939	0.0146999		1.45261	0.0080141
2.91939	0.015289		1.4576	0.0089657
2.92939	0.016968		1.4626	0.0100732
2.93938	0.01723		1.4676	0.0103574
2.94938	0.0152423		1.4726	0.0099261
2.95937	0.021499		1.4776	0.0122224
2.96937	0.026415		1.48259	0.0125731
2.97937	0.0248705		1.48759	0.0144575
2.98936	0.022352		1.49259	0.0143979
2.99936	0.0185412		1.49759	0.0135691
3.00935	0.0180411		1.50258	0.0128941
3.01935	0.0207942		1.50758	0.0106372
3.02934	0.0236835		1.51258	0.0081324
3.03934	0.0208671		1.51758	0.0049114
3.04934	0.0222289		1.52257	0.003788
3.05933	0.0283542		1.52757	0.0054778
3.06933	0.0327356		1.53257	0.0079137
3.07932	0.0338408		1.53757	0.0061349
3.08932	0.0325249		1.54256	0.0089805
3.09932	0.033655		1.54756	0.0106211
3.10931	0.0350408		1.55256	0.0106921
3.11931	0.0343271		1.55756	0.0117341
3.1293	0.0323977		1.56256	0.0147041
3.1393	0.0331898		1.56755	0.0162183
3.1493	0.0326273		1.57255	0.0148811
3.15929	0.0322843		1.57755	0.0149119
3.16929	0.031118		1.58255	0.0134039
3.17928	0.0331927		1.58754	0.0134698
3.18928	0.0367442		1.59254	0.012763
3.19927	0.0388466		1.59754	0.0143694
3.20927	0.0338532		1.60254	0.0131172
3.21927	0.033415		1.60753	0.0128944
3.22926	0.0349888		1.61253	0.0102025
3.23926	0.036081		1.61753	0.0089206
3.24925	0.0361692		1.62253	0.0095105
3.25925	0.032091		1.62752	0.0099543
3.26925	0.0306077		1.63252	0.0084007
3.27924	0.0305073		1.63752	0.0100639
3.28924	0.0352807		1.64252	0.0112382
3.29923	0.0389526		1.64752	0.0104361
3.30923	0.0425314		1.65251	0.0102953
3.31923	0.0455274		1.65751	0.0117385
3.32922	0.0468951		1.66251	0.0125424
3.33922	0.0471014		1.66751	0.0112712
3.34921	0.0470928		1.6725	0.0109512
3.35921	0.0498122		1.6775	0.0095238
3.36921	0.0520896		1.6825	0.01103
3.3792	0.0552292		1.6875	0.0111318
3.3892	0.0503624		1.69249	0.0128269
3.39919	0.0476023		1.69749	0.0121507
3.40919	0.0493388		1.70249	0.010837
3.41918	0.0534514		1.70749	0.0084789
3.42918	0.0528546		1.71248	0.0091369
3.43918	0.0535413		1.71748	0.0082407
3.44917	0.056529		1.72248	0.0071483
3.45917	0.058703		1.72748	0.0070114
3.46916	0.0548611		1.73248	0.0065793
3.47916	0.0520547		1.73747	0.0032751
3.48916	0.0542977		1.74247	0.0029503
3.49915	0.0552494		1.74747	0.0039893
3.50915	0.0545109		1.75247	0.0049431
3.51914	0.058847		1.75746	0.0065634
3.52914	0.0647124		1.76246	0.0088651
3.53914	0.0671895		1.76746	0.0095276
3.54913	0.0655426		1.77246	0.0092774
3.55913	0.0627606		1.77745	0.0124344
3.56912	0.0636541		1.78245	0.0134929
3.57912	0.0660239		1.78745	0.0138413
3.58911	0.064142		1.79245	0.0139473
3.59911	0.0634736		1.79744	0.0172727
3.60911	0.0650681		1.80244	0.0166228
3.6191	0.0664056		1.80744	0.0168497
3.6291	0.069958		1.81244	0.0176369
3.63909	0.0725315		1.81743	0.0166639
3.64909	0.0690555		1.82243	0.012028
3.65909	0.0664332		1.82743	0.0107136
3.66908	0.0673779		1.83243	0.0086312
3.67908	0.0722588		1.83743	0.0088549
3.68907	0.0733672		1.84242	0.0105613
3.69907	0.0752871		1.84742	0.0122409
3.70907	0.0773246		1.85242	0.0112482
3.71906	0.078009		1.85742	0.0121008
3.72906	0.0768237		1.86241	0.0119959
3.73905	0.0781332		1.86741	0.012412
3.74905	0.0758609		1.87241	0.0131745
3.75904	0.0761243		1.87741	0.0148572
3.76904	0.0776756		1.8824	0.0140905
3.77904	0.0813198		1.8874	0.0138862
3.78903	0.0821184		1.8924	0.0117782
3.79903	0.0830476		1.8974	0.0064447
3.80902	0.0826879		1.90239	0.004613
3.81902	0.0816194		1.90739	0.0034775
3.82902	0.0842625		1.91239	0.0013599
3.83901	0.0838802		1.91739	0.003282
3.84901	0.0869751		1.92239	0.0102597
3.859	0.0900655		1.92738	0.0114238
3.869	0.0903871		1.93238	0.0137436
3.879	0.09017		1.93738	0.0148915
3.88899	0.0918871		1.94238	0.0134747
3.89899	0.0907466		1.94737	0.0128611
3.90898	0.0912194		1.95237	0.0127021
3.91898	0.0910915		1.95737	0.010937
3.92898	0.0953997		1.96237	0.0088665
3.93897	0.0989194		1.96736	0.0073115
3.94897	0.103092		1.97236	0.0060909
3.95896	0.106736		1.97736	0.0062547
3.96896	0.105797		1.98236	0.0098855
3.97895	0.101246		1.98735	0.0138094
3.98895	0.100327		1.99235	0.015836
3.99895	0.107235		1.99735	0.0151667
4.00894	0.116173		2.00235	0.0166061
4.01894	0.117962		2.00735	0.0145056
4.02893	0.117727		2.01234	0.0128022
4.03893	0.117722		2.01734	0.0123772
4.04893	0.119948		2.02234	0.0128394
4.05892	0.121601		2.02734	0.0119333
4.06892	0.122186		2.03233	0.0107313
4.07891	0.124344		2.03733	0.011204
4.08891	0.124173		2.04233	0.0119112
4.09891	0.123722		2.04733	0.0114428
4.1089	0.125783		2.05232	0.0115215
4.1189	0.129323		2.05732	0.0126245
4.12889	0.134669		2.06232	0.0119153
4.13889	0.138235		2.06732	0.0100754
4.14888	0.139188		2.07231	0.0106605
4.15888	0.134291		2.07731	0.0116322
4.16888	0.130866		2.08231	0.0115768
4.17887	0.130451		2.08731	0.0118263
4.18887	0.131597		2.09231	0.0155434
4.19886	0.131203		2.0973	0.0177474
4.20886	0.132343		2.1023	0.0168805
4.21886	0.137832		2.1073	0.019737
4.22885	0.141627		2.1123	0.0202746
4.23885	0.142422		2.11729	0.0184437
4.24884	0.144011		2.12229	0.0161061
4.25884	0.145844		2.12729	0.0177616
4.26884	0.148486		2.13229	0.0156349
4.27883	0.148504		2.13728	0.0167637
4.28883	0.147268		2.14228	0.0173348
4.29882	0.148783		2.14728	0.0173392
4.30882	0.149217		2.15228	0.0165254
4.31882	0.15303		2.15727	0.0190669
4.32881	0.155999		2.16227	0.0190687
4.33881	0.156654		2.16727	0.0233197
4.3488	0.156457		2.17227	0.0277974
4.3588	0.16047		2.17726	0.0287132
4.36879	0.166962		2.18226	0.0274262
4.37879	0.169497		2.18726	0.0288789
4.38879	0.169577		2.19226	0.02723
4.39878	0.170604		2.19726	0.0268228
4.40878	0.171344		2.20225	0.0288282
4.41877	0.171461		2.20725	0.0306595
4.42877	0.173329		2.21225	0.026982
4.43877	0.175657		2.21725	0.0247368
4.44876	0.176572		2.22224	0.0206
4.45876	0.178659		2.22724	0.0202054
4.46875	0.177714		2.23224	0.0182119
4.47875	0.178114		2.23724	0.0188557
4.48875	0.183187		2.24223	0.0187046
4.49874	0.183307		2.24723	0.0218875
4.50874	0.185144		2.25223	0.0222632
4.51873	0.184513		2.25723	0.0243561
4.52873	0.188261		2.26222	0.0257218
4.53872	0.189616		2.26722	0.0258916
4.54872	0.188783		2.27222	0.0249211
4.55872	0.190386		2.27722	0.0236091
4.56871	0.189564		2.28222	0.0233693
4.57871	0.191786		2.28721	0.0232829
4.5887	0.195934		2.29221	0.0230943
4.5987	0.200994		2.29721	0.022006
4.6087	0.202211		2.30221	0.0186223
4.61869	0.198216		2.3072	0.0179164
4.62869	0.196506		2.3122	0.019614
4.63868	0.19649		2.3172	0.0202308
4.64868	0.199202		2.3222	0.0216053
4.65868	0.19884		2.32719	0.0266144
4.66867	0.199733		2.33219	0.0271374
4.67867	0.202005		2.33719	0.0255453
4.68866	0.206626		2.34219	0.0237308
4.69866	0.212293		2.34718	0.0234025
4.70866	0.215405		2.35218	0.021589
4.71865	0.214154		2.35718	0.0200025
4.72865	0.210871		2.36218	0.0190649
4.73864	0.208687		2.36718	0.0213197
4.74864	0.212807		2.37217	0.0239259
4.75863	0.215953		2.37717	0.0240387
4.76863	0.216895		2.38217	0.0257331
4.77863	0.21753		2.38717	0.0260295
4.78862	0.219302		2.39216	0.0248816
4.79862	0.221343		2.39716	0.0237156
4.80861	0.223647		2.40216	0.0225989
4.81861	0.227996		2.40716	0.0190152
4.82861	0.229638		2.41215	0.0191662
4.8386	0.225858		2.41715	0.0180351
4.8486	0.225551		2.42215	0.0187258
4.85859	0.229858		2.42715	0.0191219
4.86859	0.230564		2.43214	0.0218375
4.87859	0.227086		2.43714	0.023294
4.88858	0.230274		2.44214	0.0274735
4.89858	0.23232		2.44714	0.025214
4.90857	0.227382		2.45213	0.0266561
4.91857	0.228516		2.45713	0.0264115
4.92856	0.23217		2.46213	0.027561
4.93856	0.236104		2.46713	0.0243039
4.94856	0.235438		2.47213	0.0267265
4.95855	0.23757		2.47712	0.026776
4.96855	0.24077		2.48212	0.0271592
4.97854	0.24139		2.48712	0.0277365
4.98854	0.242305		2.49212	0.0303668
4.99854	0.244054		2.49711	0.0297221
5.00853	0.244413		2.50211	0.0293672
5.01853	0.247899		2.50711	0.0300694
5.02852	0.246198		2.51211	0.0309722
5.03852	0.24618		2.5171	0.0305481
5.04852	0.245932		2.5221	0.0294586
5.05851	0.247569		2.5271	0.0298796
5.06851	0.250999		2.5321	0.0295383
5.0785	0.251093		2.53709	0.0288181
5.0885	0.251746		2.54209	0.0301745
5.09849	0.25385		2.54709	0.032467
5.10849	0.255879		2.55209	0.0336273
5.11849	0.25568		2.55709	0.0323384
5.12848	0.257427		2.56208	0.0320579
5.13848	0.258699		2.56708	0.030124
5.14847	0.257199		2.57208	0.0301979
5.15847	0.255258		2.57708	0.0294913
5.16847	0.253624		2.58207	0.0319422
5.17846	0.254466		2.58707	0.0328114
5.18846	0.25654		2.59207	0.0362274
5.19845	0.259593		2.59707	0.0362114
5.20845	0.261964		2.60206	0.0386481
5.21845	0.262168		2.60706	0.0411473
5.22844	0.263634		2.61206	0.0411045
5.23844	0.261153		2.61706	0.0378586
5.24843	0.259746		2.62205	0.0372868
5.25843	0.260625		2.62705	0.0360943
5.26843	0.263066		2.63205	0.0329025
5.27842	0.269556		2.63705	0.03227
5.28842	0.27289		2.64205	0.0339744
5.29841	0.275534		2.64704	0.0362648
5.30841	0.276423		2.65204	0.0368064
5.3184	0.278018		2.65704	0.0375807
5.3284	0.275541		2.66204	0.0375535
5.3384	0.274159		2.66703	0.0366636
5.34839	0.277337		2.67203	0.0343154
5.35839	0.281185		2.67703	0.0318226
5.36838	0.280256		2.68203	0.0327951
5.37838	0.274262		2.68702	0.0351006
5.38838	0.27969		2.69202	0.0378694
5.39837	0.288305		2.69702	0.0371399
5.40837	0.293751		2.70202	0.0380305
5.41836	0.296609		2.70701	0.0382806
5.42836	0.299466		2.71201	0.0368902
5.43836	0.298126		2.71701	0.0335494
5.44835	0.296741		2.72201	0.0345312
5.45835	0.300432		2.72701	0.0349085
5.46834	0.303186		2.732	0.0329024
5.47834	0.301801		2.737	0.0331272
5.48833	0.301532		2.742	0.0329289
5.49833	0.302978		2.747	0.0326262
5.50833	0.304915		2.75199	0.032601
5.51832	0.306387		2.75699	0.0323926
5.52832	0.307675		2.76199	0.0309187
5.53831	0.306804		2.76699	0.0299934
5.54831	0.302775		2.77198	0.0313849
5.55831	0.298189		2.77698	0.0310395
5.5683	0.300843		2.78198	0.0306082
5.5783	0.304457		2.78698	0.0306208
5.58829	0.305515		2.79197	0.0315999
5.59829	0.305264		2.79697	0.0291545
5.60829	0.305905		2.80197	0.0294954
5.61828	0.310214		2.80697	0.0306
5.62828	0.317063		2.81197	0.0311862
5.63827	0.320533		2.81696	0.0338765
5.64827	0.317885		2.82196	0.036449
5.65827	0.315022		2.82696	0.0367306
5.66826	0.315553		2.83196	0.0392219
5.67826	0.319027		2.83695	0.0401393
5.68825	0.319838		2.84195	0.0396344
5.69825	0.319738		2.84695	0.0394103
5.70824	0.314858		2.85195	0.0407969
5.71824	0.313644		2.85694	0.0399932
5.72824	0.313774		2.86194	0.0403351
5.73823	0.31967		2.86694	0.0417491
5.74823	0.32318		2.87194	0.0413443
5.75822	0.321768		2.87693	0.0407114
5.76822	0.321025		2.88193	0.039269
5.77822	0.323071		2.88693	0.0398328
5.78821	0.32293		2.89193	0.0418215
5.79821	0.326065		2.89692	0.0439501
5.8082	0.328566		2.90192	0.0458975
5.8182	0.329966		2.90692	0.0478129
5.8282	0.328241		2.91192	0.0474734
5.83819	0.330782		2.91692	0.0446279
5.84819	0.328973		2.92191	0.0450583
5.85818	0.32959		2.92691	0.0439359
5.86818	0.329705		2.93191	0.0447639
5.87817	0.331384		2.93691	0.0446127
5.88817	0.329328		2.9419	0.0444724
5.89817	0.329682		2.9469	0.0436512
5.90816	0.329555		2.9519	0.0441854
5.91816	0.335197		2.9569	0.044816
5.92815	0.336696		2.96189	0.0444209
5.93815	0.340122		2.96689	0.0450901
5.94815	0.339064		2.97189	0.0450451
5.95814	0.341294		2.97689	0.0464215
5.96814	0.341631		2.98188	0.0480556
5.97813	0.34249		2.98688	0.0488221
5.98813	0.341308		2.99188	0.0460171
5.99813	0.342394		2.99688	0.0445635
6.00812	0.342556		3.00188	0.0432238
6.01812	0.344154		3.00687	0.040452
6.02811	0.343905		3.01187	0.0423453
6.03811	0.344642		3.01687	0.0458385
6.0481	0.346982		3.02187	0.0481049
6.0581	0.354696		3.02686	0.0481829
6.0681	0.356511		3.03186	0.0503527
6.07809	0.359022		3.03686	0.0499735
6.08809	0.355537		3.04186	0.0518329
6.09808	0.350871		3.04685	0.0537988
6.10808	0.345633		3.05185	0.0570426
6.11808	0.350095		3.05685	0.060157
6.12807	0.356981		3.06185	0.0613872
6.13807	0.359064		3.06684	0.0593297
6.14806	0.354791		3.07184	0.0573681
6.15806	0.351316		3.07684	0.0551965
6.16806	0.351243		3.08184	0.0499574
6.17805	0.353731		3.08684	0.049037
6.18805	0.356056		3.09183	0.0521013
6.19804	0.359649		3.09683	0.0527236
6.20804	0.360115		3.10183	0.0521194
6.21804	0.360532		3.10683	0.0540411
6.22803	0.365258		3.11182	0.0499613
6.23803	0.369076		3.11682	0.0454523
6.24802	0.368521		3.12182	0.0449067
6.25802	0.363201		3.12682	0.0463962
6.26801	0.363965		3.13181	0.0463202
6.27801	0.366905		3.13681	0.0502309
6.28801	0.366952		3.14181	0.0538641
6.298	0.368494		3.14681	0.0549195
6.308	0.3698		3.1518	0.0548065
6.31799	0.370246		3.1568	0.0542508
6.32799	0.369956		3.1618	0.054416
6.33799	0.367765		3.1668	0.0500446
6.34798	0.365182		3.1718	0.0466731
6.35798	0.3648		3.17679	0.0471796
6.36797	0.366476		3.18179	0.0468503
6.37797	0.365442		3.18679	0.0459884
6.38797	0.368854		3.19179	0.0504867
6.39796	0.371633		3.19678	0.0532642
6.40796	0.373661		3.20178	0.0530487
6.41795	0.370762		3.20678	0.0544598
6.42795	0.37157		3.21178	0.0567599
6.43794	0.373411		3.21677	0.0601301
6.44794	0.374663		3.22177	0.0625746
6.45794	0.376366		3.22677	0.0630214
6.46793	0.377537		3.23177	0.0630545
6.47793	0.376904		3.23676	0.0627088
6.48792	0.375173		3.24176	0.0605916
6.49792	0.376312		3.24676	0.0615894
6.50792	0.380273		3.25176	0.0611079
6.51791	0.381095		3.25675	0.0598288
6.52791	0.379408		3.26175	0.0602904
6.5379	0.383284		3.26675	0.0595366
6.5479	0.387001		3.27175	0.0562902
6.5579	0.386957		3.27675	0.0578012
6.56789	0.382406		3.28174	0.0598733
6.57789	0.382159		3.28674	0.060392
6.58788	0.384857		3.29174	0.0591584
6.59788	0.38739		3.29674	0.061544
6.60788	0.387708		3.30173	0.0621379
6.61787	0.390024		3.30673	0.0613197
6.62787	0.39522		3.31173	0.059615
6.63786	0.393912		3.31673	0.0608235
6.64786	0.392817		3.32172	0.0604311
6.65785	0.396436		3.32672	0.0581991
6.66785	0.400605		3.33172	0.0568617
6.67785	0.400621		3.33672	0.0568429
6.68784	0.399643		3.34171	0.0560209
6.69784	0.396969		3.34671	0.0567561
6.70783	0.397381		3.35171	0.057547
6.71783	0.400698		3.35671	0.0594842
6.72783	0.403322		3.36171	0.0614208
6.73782	0.405959		3.3667	0.0639456
6.74782	0.409294		3.3717	0.0645157
6.75781	0.409923		3.3767	0.0691879
6.76781	0.413747		3.3817	0.0697626
6.77781	0.416574		3.38669	0.0684495
6.7878	0.417578		3.39169	0.0673596
6.7978	0.412426		3.39669	0.0652591
6.80779	0.412743		3.40169	0.0619805
6.81779	0.416485		3.40668	0.0619824
6.82778	0.419796		3.41168	0.0634067
6.83778	0.420531		3.41668	0.0628041
6.84778	0.418699		3.42168	0.0617959
6.85777	0.417551		3.42667	0.0597214
6.86777	0.424388		3.43167	0.0577424
6.87776	0.431426		3.43667	0.0564629
6.88776	0.439014		3.44167	0.0568827
6.89776	0.438655		3.44667	0.0596386
6.90775	0.434268		3.45166	0.0608888
6.91775	0.436853		3.45666	0.0636034
6.92774	0.439874		3.46166	0.0652196
6.93774	0.444193		3.46666	0.0654566
6.94774	0.449207		3.47165	0.063881
6.95773	0.451666		3.47665	0.0639304
6.96773	0.449394		3.48165	0.0636131
6.97772	0.448512		3.48665	0.0641078
6.98772	0.448531		3.49164	0.0652799
6.99772	0.451136		3.49664	0.0673751
7.00771	0.457483		3.50164	0.0696516
7.01771	0.460722		3.50664	0.0724422
7.0277	0.466162		3.51163	0.0742006
7.0377	0.471732		3.51663	0.0755114
7.04769	0.476132		3.52163	0.0772838
7.05769	0.48032		3.52663	0.0756043
7.06769	0.485228		3.53163	0.0741197
7.07768	0.490281		3.53662	0.073687
7.08768	0.497327		3.54162	0.0729993
7.09767	0.500023		3.54662	0.0706471
7.10767	0.504348		3.55162	0.0699141
7.11767	0.510568		3.55661	0.0703883
7.12766	0.519127		3.56161	0.0702871
7.13766	0.528413		3.56661	0.0699979
7.14765	0.536912		3.57161	0.0705831
7.15765	0.541561		3.5766	0.0709597
7.16765	0.543768		3.5816	0.0695613
7.17764	0.548279		3.5866	0.0696591
7.18764	0.553207		3.5916	0.0690851
7.19763	0.561574		3.59659	0.0679998
7.20763	0.567873		3.60159	0.0686334
7.21762	0.573327		3.60659	0.0700775
7.22762	0.579321		3.61159	0.0688595
7.23762	0.583966		3.61659	0.0695958
7.24761	0.589447		3.62158	0.0724904
7.25761	0.596694		3.62658	0.0732543
7.2676	0.604466		3.63158	0.0705799
7.2776	0.613076		3.63658	0.0700754
7.2876	0.614835		3.64157	0.0700686
7.29759	0.620825		3.64657	0.0685165
7.30759	0.626512		3.65157	0.0707058
7.31758	0.636598		3.65657	0.0741389
7.32758	0.648214		3.66156	0.076594
7.33758	0.660065		3.66656	0.077177
7.34757	0.669103		3.67156	0.0795037
7.35757	0.679551		3.67656	0.0764701
7.36756	0.694091		3.68155	0.0756059
7.37756	0.705529		3.68655	0.0749921
7.38756	0.715463		3.69155	0.0731566
7.39755	0.726784		3.69655	0.0704525
7.40755	0.738502		3.70155	0.0693417
7.41754	0.75042		3.70654	0.0690384
7.42754	0.764767		3.71154	0.0666857
7.43753	0.780235		3.71654	0.0675729
7.44753	0.790343		3.72154	0.0673227
7.45753	0.798744		3.72653	0.0690696
7.46752	0.807057		3.73153	0.0677177
7.47752	0.819715		3.73653	0.0712812
7.48751	0.829514		3.74153	0.0717091
7.49751	0.838162		3.74652	0.0727555
7.50751	0.845289		3.75152	0.0731157
7.5175	0.854316		3.75652	0.07238
7.5275	0.86368		3.76152	0.0690086
7.53749	0.869731		3.76651	0.0688592
7.54749	0.873502		3.77151	0.0704294
7.55749	0.879265		3.77651	0.0713871
7.56748	0.884972		3.78151	0.0751256
7.57748	0.88791		3.7865	0.0779882
7.58747	0.885847		3.7915	0.078518
7.59747	0.879739		3.7965	0.0763141
7.60746	0.875759		3.8015	0.0768511
7.61746	0.875185		3.8065	0.0772336
7.62746	0.874248		3.81149	0.0763811
7.63745	0.869819		3.81649	0.0758923
7.64745	0.863078		3.82149	0.0762459
7.65744	0.859915		3.82649	0.073655
7.66744	0.853549		3.83148	0.072275
7.67744	0.842993		3.83648	0.0717699
7.68743	0.834879		3.84148	0.0731914
7.69743	0.82828		3.84648	0.0742628
7.70742	0.821976		3.85147	0.0749978
7.71742	0.810041		3.85647	0.0760118
7.72742	0.797275		3.86147	0.0766235
7.73741	0.786851		3.86647	0.0753491
7.74741	0.781624		3.87146	0.0747952
7.7574	0.777853		3.87646	0.0777097
7.7674	0.765982		3.88146	0.0786014
7.77739	0.751295		3.88646	0.0794077
7.78739	0.741144		3.89146	0.0802498
7.79739	0.735057		3.89645	0.0819434
7.80738	0.730476		3.90145	0.0813701
7.81738	0.719547		3.90645	0.0795672
7.82737	0.711839		3.91145	0.0797948
7.83737	0.705771		3.91644	0.0778961
7.84737	0.699044		3.92144	0.0752807
7.85736	0.687717		3.92644	0.0728637
7.86736	0.682817		3.93144	0.0727332
7.87735	0.679148		3.93643	0.0722672
7.88735	0.676758		3.94143	0.074622
7.89735	0.675901		3.94643	0.0777392
7.90734	0.671393		3.95143	0.0799102
7.91734	0.663632		3.95642	0.0810277
7.92733	0.656889		3.96142	0.0788998
7.93733	0.651386		3.96642	0.0781341
7.94733	0.645257		3.97142	0.0762549
7.95732	0.640718		3.97642	0.0758855
7.96732	0.641706		3.98141	0.077549
7.97731	0.639973		3.98641	0.0807603
7.98731	0.636248		3.99141	0.082982
7.9973	0.633681		3.99641	0.0859593
8.0073	0.634295		4.0014	0.0861714
8.0173	0.629855		4.0064	0.0837823
8.02729	0.629853		4.0114	0.0832187
8.03729	0.629501		4.0164	0.0815878
8.04728	0.624059		4.02139	0.0803786
8.05728	0.618967		4.02639	0.0803024
8.06728	0.621536		4.03139	0.0820786
8.07727	0.623795		4.03639	0.08273
8.08727	0.618283		4.04138	0.08388
8.09726	0.614651		4.04638	0.082298
8.10726	0.613949		4.05138	0.0815659
8.11726	0.613821		4.05638	0.0823405
8.12725	0.610881		4.06138	0.0846094
8.13725	0.609979		4.06637	0.0846545
8.14724	0.611832		4.07137	0.0881639
8.15724	0.616022		4.07637	0.0899885
8.16723	0.618864		4.08137	0.0888045
8.17723	0.616072		4.08636	0.0885401
8.18723	0.612217		4.09136	0.0906736
8.19722	0.610366		4.09636	0.0890671
8.20722	0.611336		4.10136	0.0905362
8.21721	0.609065		4.10635	0.0910315
8.22721	0.606749		4.11135	0.0895338
8.23721	0.604622		4.11635	0.0918077
8.2472	0.603098		4.12135	0.0925414
8.2572	0.600729		4.12634	0.0922837
8.26719	0.603514		4.13134	0.0912787
8.27719	0.60872		4.13634	0.0896934
8.28719	0.610559		4.14134	0.0849313
8.29718	0.607164		4.14634	0.0855281
8.30718	0.607338		4.15133	0.0870687
8.31717	0.606244		4.15633	0.0901172
8.32717	0.606316		4.16133	0.0940615
8.33717	0.60603		4.16633	0.0981963
8.34716	0.606344		4.17132	0.101761
8.35716	0.606037		4.17632	0.10117
8.36715	0.607648		4.18132	0.100168
8.37715	0.608229		4.18632	0.0964727
8.38714	0.605984		4.19131	0.092044
8.39714	0.607612		4.19631	0.0873764
8.40714	0.611117		4.20131	0.0866599
8.41713	0.614631		4.20631	0.0864436
8.42713	0.614291		4.2113	0.0893593
8.43712	0.613647		4.2163	0.0956514
8.44712	0.612115		4.2213	0.0962138
8.45712	0.608891		4.2263	0.0925565
8.46711	0.609303		4.2313	0.0934985
8.47711	0.610679		4.23629	0.0916751
8.4871	0.609735		4.24129	0.0863393
8.4971	0.611262		4.24629	0.0880867
8.5071	0.616906		4.25129	0.0919597
8.51709	0.620128		4.25628	0.0940842
8.52709	0.618502		4.26128	0.0949693
8.53708	0.620566		4.26628	0.0968553
8.54708	0.623033		4.27128	0.0971846
8.55707	0.625336		4.27627	0.0963735
8.56707	0.621086		4.28127	0.0938241
8.57707	0.624671		4.28627	0.0944561
8.58706	0.628183		4.29127	0.0932063
8.59706	0.63156		4.29626	0.0910817
8.60705	0.632573		4.30126	0.0926265
8.61705	0.636344		4.30626	0.0940719
8.62705	0.634742		4.31126	0.094562
8.63704	0.637834		4.31625	0.0931352
8.64704	0.641122		4.32125	0.0942793
8.65703	0.644319		4.32625	0.0933944
8.66703	0.641818		4.33125	0.0914071
8.67703	0.63739		4.33625	0.0904199
8.68702	0.639634		4.34124	0.0927238
8.69702	0.645762		4.34624	0.0925178
8.70701	0.651497		4.35124	0.0932507
8.71701	0.649051		4.35624	0.0952116
8.72701	0.649516		4.36123	0.0952968
8.737	0.652636		4.36623	0.0939569
8.747	0.657612		4.37123	0.0950786
8.75699	0.661549		4.37623	0.0974718
8.76699	0.665383		4.38122	0.0980258
8.77698	0.669523		4.38622	0.100107
8.78698	0.672708		4.39122	0.105118
8.79698	0.674388		4.39622	0.105765
8.80697	0.679258		4.40121	0.102202
8.81697	0.683785		4.40621	0.1018
8.82696	0.688922		4.41121	0.102445
8.83696	0.690547		4.41621	0.101931
8.84696	0.689473		4.42121	0.10235
8.85695	0.69115		4.4262	0.101557
8.86695	0.697674		4.4312	0.102124
8.87694	0.703295		4.4362	0.0999826
8.88694	0.708663		4.4412	0.0990526
8.89694	0.710901		4.44619	0.0985558
8.90693	0.711048		4.45119	0.102839
8.91693	0.711034		4.45619	0.103239
8.92692	0.715082		4.46119	0.104474
8.93692	0.719619		4.46618	0.104082
8.94691	0.722221		4.47118	0.103947
8.95691	0.724313		4.47618	0.101911
8.96691	0.72918		4.48118	0.0984241
8.9769	0.732009		4.48617	0.0971602
8.9869	0.736169		4.49117	0.0969533
8.99689	0.73936		4.49617	0.0956323
9.00689	0.742215		4.50117	0.0953347
9.01689	0.743812		4.50617	0.0977757
9.02688	0.75005		4.51116	0.0999251
9.03688	0.755533		4.51616	0.101928
9.04687	0.764501		4.52116	0.103979
9.05687	0.76921		4.52616	0.105095
9.06687	0.771418		4.53115	0.106456
9.07686	0.773232		4.53615	0.10763
9.08686	0.779659		4.54115	0.107286
9.09685	0.786397		4.54615	0.106167
9.10685	0.790039		4.55114	0.105966
9.11684	0.792427		4.55614	0.107126
9.12684	0.797777		4.56114	0.109879
9.13684	0.798318		4.56614	0.109071
9.14683	0.802108		4.57113	0.10957
9.15683	0.809726		4.57613	0.109842
9.16682	0.815376		4.58113	0.108677
9.17682	0.821386		4.58613	0.105247
9.18682	0.82686		4.59113	0.105088
9.19681	0.831485		4.59612	0.106383
9.20681	0.839509		4.60112	0.108744
9.2168	0.850159		4.60612	0.109693
9.2268	0.859278		4.61112	0.108961
9.2368	0.8635		4.61611	0.107439
9.24679	0.865971		4.62111	0.106074
9.25679	0.871133		4.62611	0.10289
9.26678	0.876732		4.63111	0.102384
9.27678	0.880423		4.6361	0.105596
9.28678	0.884709		4.6411	0.109558
9.29677	0.89097		4.6461	0.11408
9.30677	0.89692		4.6511	0.11572
9.31676	0.90135		4.65609	0.115628
9.32676	0.902243		4.66109	0.113248
9.33675	0.907106		4.66609	0.112732
9.34675	0.914693		4.67109	0.107985
9.35675	0.925748		4.67608	0.108826
9.36674	0.937194		4.68108	0.108555
9.37674	0.944971		4.68608	0.109137
9.38673	0.948716		4.69108	0.10796
9.39673	0.950035		4.69608	0.109661
9.40673	0.956724		4.70107	0.11087
9.41672	0.96668		4.70607	0.113196
9.42672	0.974974		4.71107	0.112995
9.43671	0.979881		4.71607	0.11323
9.44671	0.985796		4.72106	0.111202
9.45671	0.995388		4.72606	0.109546
9.4667	1.00361		4.73106	0.108986
9.4767	1.00712		4.73606	0.109715
9.48669	1.01503		4.74105	0.111642
9.49669	1.02255		4.74605	0.113225
9.50668	1.03161		4.75105	0.112906
9.51668	1.04044		4.75605	0.1132
9.52668	1.04877		4.76105	0.113347
9.53667	1.05539		4.76604	0.113014
9.54667	1.06285		4.77104	0.115777
9.55666	1.06935		4.77604	0.115066
9.56666	1.07809		4.78104	0.114479
9.57666	1.08698		4.78603	0.114234
9.58665	1.09624		4.79103	0.115378
9.59665	1.10468		4.79603	0.115701
9.60664	1.11384		4.80103	0.118871
9.61664	1.12273		4.80602	0.118902
9.62664	1.12719		4.81102	0.119454
9.63663	1.12849		4.81602	0.117537
9.64663	1.13733		4.82102	0.116138
9.65662	1.15199		4.82601	0.114234
9.66662	1.16239		4.83101	0.112848
9.67662	1.16998		4.83601	0.11487
9.68661	1.17741		4.84101	0.117127
9.69661	1.18858		4.846	0.118422
9.7066	1.19972		4.851	0.120834
9.7166	1.21111		4.856	0.124707
9.72659	1.21942		4.861	0.121953
9.73659	1.22698		4.866	0.119474
9.74659	1.2353		4.87099	0.11745
9.75658	1.24807		4.87599	0.115157
9.76658	1.26086		4.88099	0.113478
9.77657	1.26669		4.88599	0.115643
9.78657	1.27375		4.89098	0.113741
9.79657	1.28046		4.89598	0.113158
9.80656	1.29024		4.90098	0.113932
9.81656	1.30425		4.90598	0.114539
9.82655	1.31744		4.91097	0.112996
9.83655	1.3299		4.91597	0.114253
9.84655	1.33916		4.92097	0.116346
9.85654	1.35256		4.92597	0.117515
9.86654	1.36568		4.93096	0.116215
9.87653	1.37883		4.93596	0.117001
9.88653	1.38862		4.94096	0.119165
9.89652	1.40046		4.94596	0.120221
9.90652	1.41263		4.95096	0.121563
9.91652	1.4228		4.95595	0.12427
9.92651	1.4348		4.96095	0.12446
9.93651	1.44911		4.96595	0.122926
9.9465	1.46275		4.97095	0.121432
9.9565	1.4748		4.97594	0.12079
9.9665	1.48456		4.98094	0.119763
9.97649	1.49517		4.98594	0.120428
9.98649	1.50612		4.99094	0.120196
9.99648	1.51671		4.99593	0.120885
10.0065	1.53151		5.00093	0.120881
10.0165	1.54896		5.00593	0.121018
10.0265	1.55809		5.01093	0.121886
10.0365	1.57014		5.01592	0.124809
10.0465	1.58485		5.02092	0.125496
10.0565	1.60125		5.02592	0.124253
10.0665	1.6148		5.03092	0.122907
10.0765	1.63063		5.03592	0.119762
10.0864	1.64741		5.04091	0.116546
10.0964	1.66144		5.04591	0.112054
10.1064	1.67152		5.05091	0.110262
10.1164	1.68617		5.05591	0.108837
10.1264	1.70195		5.0609	0.110357
10.1364	1.71904		5.0659	0.111248
10.1464	1.73571		5.0709	0.116627
10.1564	1.75397		5.0759	0.119353
10.1664	1.7711		5.08089	0.123394
10.1764	1.78852		5.08589	0.125551
10.1864	1.80414		5.09089	0.125934
10.1964	1.81644		5.09589	0.124066
10.2064	1.83079		5.10088	0.12313
10.2164	1.84716		5.10588	0.122421
10.2264	1.86355		5.11088	0.1199
10.2364	1.87851		5.11588	0.120239
10.2464	1.89432		5.12087	0.119547
10.2564	1.91509		5.12587	0.12117
10.2664	1.93648		5.13087	0.121142
10.2764	1.95228		5.13587	0.123318
10.2864	1.9689		5.14087	0.124574
10.2964	1.98866		5.14586	0.126223
10.3064	2.01279		5.15086	0.125097
10.3164	2.03114		5.15586	0.123847
10.3263	2.0479		5.16086	0.123051
10.3363	2.07051		5.16585	0.123227
10.3463	2.0956		5.17085	0.122989
10.3563	2.11695		5.17585	0.12378
10.3663	2.13412		5.18085	0.126005
10.3763	2.15583		5.18584	0.129469
10.3863	2.18247		5.19084	0.127962
10.3963	2.20229		5.19584	0.126849
10.4063	2.21936		5.20084	0.126989
10.4163	2.24309		5.20583	0.126482
10.4263	2.26881		5.21083	0.122573
10.4363	2.29267		5.21583	0.122324
10.4463	2.31439		5.22083	0.123079
10.4563	2.33758		5.22583	0.121655
10.4663	2.36369		5.23082	0.1213
10.4763	2.38966		5.23582	0.12314
10.4863	2.41405		5.24082	0.124224
10.4963	2.44005		5.24582	0.124346
10.5063	2.46724		5.25081	0.127026
10.5163	2.49197		5.25581	0.127673
10.5263	2.51978		5.26081	0.127086
10.5363	2.54604		5.26581	0.129597
10.5463	2.57079		5.2708	0.132217
10.5563	2.60007		5.2758	0.130202
10.5662	2.62758		5.2808	0.129857
10.5762	2.65782		5.2858	0.129997
10.5862	2.6901		5.29079	0.13024
10.5962	2.72481		5.29579	0.128489
10.6062	2.755		5.30079	0.130967
10.6162	2.7796		5.30579	0.133925
10.6262	2.80774		5.31079	0.135754
10.6362	2.83806		5.31578	0.133332
10.6462	2.8735		5.32078	0.134007
10.6562	2.90921		5.32578	0.133049
10.6662	2.94152		5.33078	0.127179
10.6762	2.97478		5.33577	0.124503
10.6862	3.01289		5.34077	0.124603
10.6962	3.04754		5.34577	0.122976
10.7062	3.08337		5.35077	0.120261
10.7162	3.11475		5.35576	0.122041
10.7262	3.15068		5.36076	0.122481
10.7362	3.18662		5.36576	0.123681
10.7462	3.22239		5.37076	0.125752
10.7562	3.26166		5.37575	0.12694
10.7662	3.30027		5.38075	0.129724
10.7762	3.34004		5.38575	0.132678
10.7862	3.37889		5.39075	0.136805
10.7962	3.41833		5.39575	0.138937
10.8062	3.45582		5.40074	0.139773
10.8161	3.49687		5.40574	0.138734
10.8261	3.53986		5.41074	0.137011
10.8361	3.58148		5.41574	0.131537
10.8461	3.6245		5.42073	0.128678
10.8561	3.66919		5.42573	0.128646
10.8661	3.71414		5.43073	0.126721
10.8761	3.75503		5.43573	0.129444
10.8861	3.79414		5.44072	0.134656
10.8961	3.8353		5.44572	0.135709
10.9061	3.8804		5.45072	0.136551
10.9161	3.92668		5.45572	0.138858
10.9261	3.97206		5.46071	0.137372
10.9361	4.01815		5.46571	0.134734
10.9461	4.06136		5.47071	0.135433
10.9561	4.10433		5.47571	0.137039
10.9661	4.15005		5.4807	0.136655
10.9761	4.20176		5.4857	0.135463
10.9861	4.24969		5.4907	0.135956
10.9961	4.29519		5.4957	0.136049
11.0061	4.33781		5.5007	0.135449
11.0161	4.38473		5.50569	0.134911
11.0261	4.43304		5.51069	0.135315
11.0361	4.47993		5.51569	0.132735
11.0461	4.52971		5.52069	0.131353
11.056	4.57767		5.52568	0.129387
11.066	4.62174		5.53068	0.128769
11.076	4.66765		5.53568	0.128736
11.086	4.72009		5.54068	0.13124
11.096	4.77048		5.54567	0.132556
11.106	4.81304		5.55067	0.133639
11.116	4.85791		5.55567	0.139728
11.126	4.90804		5.56067	0.139841
11.136	4.9604		5.56566	0.139275
11.146	5.00759		5.57066	0.142641
11.156	5.05696		5.57566	0.145559
11.166	5.10714		5.58066	0.139835
11.176	5.1544		5.58566	0.140892
11.186	5.20218		5.59065	0.139853
11.196	5.24925		5.59565	0.135638
11.206	5.30147		5.60065	0.133698
11.216	5.34826		5.60565	0.134542
11.226	5.39237		5.61064	0.132057
11.236	5.43877		5.61564	0.133523
11.246	5.48746		5.62064	0.135672
11.256	5.53588		5.62564	0.137535
11.266	5.58409		5.63063	0.14015
11.276	5.62965		5.63563	0.142016
11.286	5.67884		5.64063	0.141052
11.296	5.73018		5.64563	0.140926
11.3059	5.77845		5.65062	0.142496
11.3159	5.82902		5.65562	0.141859
11.3259	5.87828		5.66062	0.14337
11.3359	5.9253		5.66562	0.14518
11.3459	5.97181		5.67062	0.14433
11.3559	6.02391		5.67561	0.140906
11.3659	6.0714		5.68061	0.142982
11.3759	6.11724		5.68561	0.14422
11.3859	6.1607		5.69061	0.143777
11.3959	6.20993		5.6956	0.144058
11.4059	6.26305		5.7006	0.145823
11.4159	6.3161		5.7056	0.143548
11.4259	6.36623		5.7106	0.143901
11.4359	6.41507		5.71559	0.145264
11.4459	6.45809		5.72059	0.14562
11.4559	6.50279		5.72559	0.146082
11.4659	6.54945		5.73059	0.14619
11.4759	6.59984		5.73558	0.143951
11.4859	6.64786		5.74058	0.143669
11.4959	6.69992		5.74558	0.144993
11.5059	6.75242		5.75058	0.142842
11.5159	6.80377		5.75558	0.143553
11.5259	6.85076		5.76057	0.143008
11.5359	6.9		5.76557	0.140614
11.5458	6.95298		5.77057	0.138068
11.5558	7.0077		5.77557	0.139964
11.5658	7.05445		5.78056	0.137394
11.5758	7.09941		5.78556	0.136971
11.5858	7.14513		5.79056	0.137635
11.5958	7.2005		5.79556	0.138968
11.6058	7.26047		5.80055	0.137746
11.6158	7.31732		5.80555	0.141692
11.6258	7.37093		5.81055	0.142311
11.6358	7.42621		5.81555	0.14272
11.6458	7.48383		5.82054	0.143331
11.6558	7.54105		5.82554	0.143811
11.6658	7.59763		5.83054	0.14204
11.6758	7.65449		5.83554	0.141079
11.6858	7.71624		5.84054	0.143312
11.6958	7.78232		5.84553	0.142616
11.7058	7.84796		5.85053	0.142302
11.7158	7.91144		5.85553	0.140662
11.7258	7.97751		5.86053	0.140807
11.7358	8.04637		5.86552	0.137802
11.7458	8.11719		5.87052	0.137705
11.7558	8.19033		5.87552	0.139685
11.7658	8.26644		5.88052	0.143594
11.7758	8.34813		5.88551	0.145627
11.7857	8.42803		5.89051	0.14713
11.7957	8.51404		5.89551	0.14883
11.8057	8.60512		5.90051	0.148092
11.8157	8.70062		5.9055	0.144525
11.8257	8.79316		5.9105	0.143709
11.8357	8.88872		5.9155	0.142933
11.8457	8.99229		5.9205	0.142264
11.8557	9.10644		5.92549	0.142247
11.8657	9.224		5.93049	0.142118
11.8757	9.34732		5.93549	0.143688
11.8857	9.47477		5.94049	0.145205
11.8957	9.60482		5.94549	0.145162
11.9057	9.73954		5.95048	0.14654
11.9157	9.88783		5.95548	0.149604
11.9257	10.044		5.96048	0.147737
11.9357	10.2052		5.96548	0.146046
11.9457	10.3724		5.97047	0.144621
11.9557	10.5528		5.97547	0.144304
11.9657	10.7452		5.98047	0.143821
11.9757	10.948		5.98547	0.14378
11.9857	11.1594		5.99046	0.146009
11.9957	11.38		5.99546	0.146481
12.0057	11.6126		6.00046	0.145034
12.0157	11.8545		6.00546	0.141664
12.0257	12.1085		6.01045	0.140446
12.0356	12.3761		6.01545	0.138269
12.0456	12.6539		6.02045	0.138042
12.0556	12.944		6.02545	0.138635
12.0656	13.2497		6.03045	0.13992
12.0756	13.573		6.03544	0.142927
12.0856	13.9071		6.04044	0.14318
12.0956	14.2535		6.04544	0.144625
12.1056	14.6091		6.05044	0.14442
12.1156	14.9811		6.05543	0.144869
12.1256	15.3699		6.06043	0.146222
12.1356	15.7695		6.06543	0.149023
12.1456	16.1853		6.07043	0.151747
12.1556	16.6115		6.07542	0.151019
12.1656	17.0536		6.08042	0.151579
12.1756	17.515		6.08542	0.149256
12.1856	17.9891		6.09042	0.146879
12.1956	18.469		6.09541	0.143725
12.2056	18.9598		6.10041	0.145687
12.2156	19.4613		6.10541	0.149768
12.2256	19.9776		6.11041	0.15102
12.2356	20.5109		6.11541	0.150522
12.2456	21.0495		6.1204	0.149135
12.2556	21.5899		6.1254	0.148912
12.2656	22.1393		6.1304	0.149309
12.2755	22.7015		6.1354	0.150921
12.2855	23.2764		6.14039	0.151402
12.2955	23.8494		6.14539	0.152972
12.3055	24.4246		6.15039	0.153082
12.3155	25.0113		6.15539	0.148869
12.3255	25.605		6.16038	0.146842
12.3355	26.1978		6.16538	0.148849
12.3455	26.7889		6.17038	0.147706
12.3555	27.3815		6.17538	0.148964
12.3655	27.9786		6.18037	0.150583
12.3755	28.5741		6.18537	0.149631
12.3855	29.1709		6.19037	0.148752
12.3955	29.7644		6.19537	0.151063
12.4055	30.3473		6.20037	0.148983
12.4155	30.9247		6.20536	0.149088
12.4255	31.4982		6.21036	0.149906
12.4355	32.067		6.21536	0.149688
12.4455	32.6313		6.22036	0.147995
12.4555	33.1821		6.22535	0.149319
12.4655	33.7198		6.23035	0.148796
12.4755	34.2494		6.23535	0.149192
12.4855	34.7646		6.24035	0.152498
12.4955	35.2746		6.24534	0.156042
12.5055	35.7761		6.25034	0.154311
12.5154	36.2551		6.25534	0.153646
12.5254	36.7206		6.26034	0.154636
12.5354	37.1761		6.26533	0.152679
12.5454	37.6145		6.27033	0.15193
12.5554	38.0319		6.27533	0.153482
12.5654	38.4321		6.28033	0.153599
12.5754	38.8151		6.28533	0.151177
12.5854	39.1805		6.29032	0.151004
12.5954	39.5298		6.29532	0.14944
12.6054	39.8701		6.30032	0.151571
12.6154	40.188		6.30532	0.154867
12.6254	40.4784		6.31031	0.156535
12.6354	40.7482		6.31531	0.156478
12.6454	40.9945		6.32031	0.155617
12.6554	41.2253		6.32531	0.153537
12.6654	41.4397		6.3303	0.151605
12.6754	41.6297		6.3353	0.152088
12.6854	41.7952		6.3403	0.150433
12.6954	41.9432		6.3453	0.149528
12.7054	42.0774		6.35029	0.149141
12.7154	42.1844		6.35529	0.148647
12.7254	42.2679		6.36029	0.150716
12.7354	42.3344		6.36529	0.15493
12.7454	42.3771		6.37028	0.156769
12.7554	42.393		6.37528	0.156619
12.7653	42.3898		6.38028	0.1578
12.7753	42.3739		6.38528	0.157313
12.7853	42.3431		6.39028	0.155656
12.7953	42.2839		6.39527	0.15735
12.8053	42.2014		6.40027	0.160371
12.8153	42.1048		6.40527	0.162236
12.8253	41.9886		6.41027	0.160464
12.8353	41.8551		6.41526	0.161768
12.8453	41.703		6.42026	0.163128
12.8553	41.5301		6.42526	0.162903
12.8653	41.3377		6.43026	0.161464
12.8753	41.1308		6.43525	0.164271
12.8853	40.9061		6.44025	0.16526
12.8953	40.667		6.44525	0.165801
12.9053	40.411		6.45025	0.167367
12.9153	40.1366		6.45524	0.167203
12.9253	39.8455		6.46024	0.166446
12.9353	39.5429		6.46524	0.166447
12.9453	39.2262		6.47024	0.166909
12.9553	38.8949		6.47524	0.165104
12.9653	38.5528		6.48023	0.165674
12.9753	38.1985		6.48523	0.167043
12.9853	37.8365		6.49023	0.166465
12.9953	37.4615		6.49523	0.166828
13.0052	37.0709		6.50022	0.166835
13.0152	36.6683		6.50522	0.165677
13.0252	36.2616		6.51022	0.163253
13.0352	35.8486		6.51522	0.161878
13.0452	35.4263		6.52021	0.159352
13.0552	34.9912		6.52521	0.156905
13.0652	34.5454		6.53021	0.156436
13.0752	34.0953		6.53521	0.157456
13.0852	33.6412		6.5402	0.15731
13.0952	33.1779		6.5452	0.158262
13.1052	32.7136		6.5502	0.161968
13.1152	32.2443		6.5552	0.164282
13.1252	31.7707		6.5602	0.165007
13.1352	31.2926		6.56519	0.16686
13.1452	30.8135		6.57019	0.168009
13.1552	30.3308		6.57519	0.169367
13.1652	29.8488		6.58019	0.170734
13.1752	29.3612		6.58518	0.169399
13.1852	28.8701		6.59018	0.169469
13.1952	28.3763		6.59518	0.168826
13.2052	27.882		6.60018	0.166787
13.2152	27.3966		6.60517	0.167703
13.2252	26.9175		6.61017	0.16963
13.2352	26.4347		6.61517	0.169833
13.2451	25.9461		6.62017	0.170342
13.2551	25.4584		6.62516	0.168596
13.2651	24.9771		6.63016	0.168396
13.2751	24.495		6.63516	0.170415
13.2851	24.0161		6.64016	0.170867
13.2951	23.5421		6.64516	0.171694
13.3051	23.0745		6.65015	0.174761
13.3151	22.6099		6.65515	0.171031
13.3251	22.1479		6.66015	0.167099
13.3351	21.6897		6.66515	0.168818
13.3451	21.2355		6.67014	0.166851
13.3551	20.783		6.67514	0.165479
13.3651	20.3415		6.68014	0.169329
13.3751	19.9091		6.68514	0.170279
13.3851	19.4748		6.69013	0.169173
13.3951	19.05		6.69513	0.167644
13.4051	18.6305		6.70013	0.167845
13.4151	18.2149		6.70513	0.16602
13.4251	17.8079		6.71012	0.166322
13.4351	17.4093		6.71512	0.165377
13.4451	17.0151		6.72012	0.170473
13.4551	16.6297		6.72512	0.169121
13.4651	16.2504		6.73012	0.169186
13.4751	15.8813		6.73511	0.172306
13.4851	15.5162		6.74011	0.174976
13.495	15.156		6.74511	0.175166
13.505	14.7974		6.75011	0.179558
13.515	14.4503		6.7551	0.182382
13.525	14.1109		6.7601	0.182817
13.535	13.7817		6.7651	0.180929
13.545	13.4534		6.7701	0.177571
13.555	13.1391		6.77509	0.176507
13.565	12.8319		6.78009	0.17499
13.575	12.5312		6.78509	0.172823
13.585	12.2367		6.79009	0.173359
13.595	11.9492		6.79508	0.176854
13.605	11.67		6.80008	0.174755
13.615	11.3972		6.80508	0.174499
13.625	11.1301		6.81008	0.174524
13.635	10.8717		6.81508	0.175697
13.645	10.62		6.82007	0.175233
13.655	10.3736		6.82507	0.17665
13.665	10.1366		6.83007	0.177027
13.675	9.90703		6.83507	0.177448
13.685	9.68313		6.84006	0.177335
13.695	9.46696		6.84506	0.177569
13.705	9.25507		6.85006	0.180806
13.715	9.05248		6.85506	0.18095
13.725	8.85891		6.86005	0.182475
13.7349	8.66709		6.86505	0.18271
13.7449	8.48056		6.87005	0.182595
13.7549	8.30571		6.87505	0.180694
13.7649	8.13801		6.88004	0.182937
13.7749	7.97416		6.88504	0.183129
13.7849	7.81224		6.89004	0.182963
13.7949	7.65774		6.89504	0.182609
13.8049	7.51239		6.90003	0.183097
13.8149	7.37338		6.90503	0.183033
13.8249	7.23477		6.91003	0.184789
13.8349	7.09765		6.91503	0.183269
13.8449	6.97409		6.92003	0.181327
13.8549	6.86045		6.92502	0.179301
13.8649	6.74784		6.93002	0.175509
13.8749	6.6376		6.93502	0.173053
13.8849	6.53235		6.94002	0.175234
13.8949	6.43128		6.94501	0.178325
13.9049	6.34123		6.95001	0.1804
13.9149	6.2533		6.95501	0.183763
13.9249	6.16579		6.96001	0.184921
13.9349	6.08406		6.965	0.182534
13.9449	6.01283		6.97	0.181045
13.9549	5.94266		6.975	0.181355
13.9649	5.87465		6.98	0.179696
13.9749	5.808		6.98499	0.179406
13.9848	5.74288		6.98999	0.183764
13.9948	5.68464		6.99499	0.184717
14.0048	5.63205		6.99999	0.184443
14.0148	5.58147		7.00499	0.188133
14.0248	5.53726		7.00998	0.188829
14.0348	5.49926		7.01498	0.186932
14.0448	5.46148		7.01998	0.185348
14.0548	5.42264		7.02498	0.185916
14.0648	5.38701		7.02997	0.186132
14.0748	5.35632		7.03497	0.188504
14.0848	5.32712		7.03997	0.187896
14.0948	5.30165		7.04497	0.193139
14.1048	5.27762		7.04996	0.195926
14.1148	5.25372		7.05496	0.194462
14.1248	5.22644		7.05996	0.192454
14.1348	5.20641		7.06496	0.193236
14.1448	5.19507		7.06995	0.191734
14.1548	5.18339		7.07495	0.189671
14.1648	5.1651		7.07995	0.189938
14.1748	5.15011		7.08495	0.191401
14.1848	5.13573		7.08995	0.192289
14.1948	5.12848		7.09494	0.190997
14.2048	5.12396		7.09994	0.189682
14.2148	5.11652		7.10494	0.18904
14.2247	5.10585		7.10994	0.187695
14.2347	5.10086		7.11493	0.189293
14.2447	5.09638		7.11993	0.191481
14.2547	5.09182		7.12493	0.193047
14.2647	5.08859		7.12993	0.196896
14.2747	5.0822		7.13492	0.20002
14.2847	5.07056		7.13992	0.198727
14.2947	5.06152		7.14492	0.197659
14.3047	5.05888		7.14992	0.200527
14.3147	5.05488		7.15491	0.202287
14.3247	5.05213		7.15991	0.203853
14.3347	5.04979		7.16491	0.203648
14.3447	5.05157		7.16991	0.204494
14.3547	5.04587		7.1749	0.202886
14.3647	5.03781		7.1799	0.201541
14.3747	5.03081		7.1849	0.200877
14.3847	5.01845		7.1899	0.206973
14.3947	5.00977		7.1949	0.210303
14.4047	5.00251		7.19989	0.213819
14.4147	4.9967		7.20489	0.213776
14.4247	4.98894		7.20989	0.213324
14.4347	4.9797		7.21489	0.212347
14.4447	4.96763		7.21988	0.211168
14.4547	4.95335		7.22488	0.210587
14.4646	4.94167		7.22988	0.211101
14.4746	4.93016		7.23488	0.210769
14.4846	4.92095		7.23987	0.204951
14.4946	4.9083		7.24487	0.202404
14.5046	4.89671		7.24987	0.20003
14.5146	4.88495		7.25487	0.199738
14.5246	4.87159		7.25986	0.201367
14.5346	4.85408		7.26486	0.206644
14.5446	4.84107		7.26986	0.211428
14.5546	4.82897		7.27486	0.214758
14.5646	4.81788		7.27986	0.214874
14.5746	4.79915		7.28485	0.212764
14.5846	4.77942		7.28985	0.210988
14.5946	4.7626		7.29485	0.207447
14.6046	4.74856		7.29985	0.204992
14.6146	4.73066		7.30484	0.203199
14.6246	4.71441		7.30984	0.204699
14.6346	4.70206		7.31484	0.205049
14.6446	4.68314		7.31984	0.205938
14.6546	4.66103		7.32483	0.207483
14.6646	4.64147		7.32983	0.208347
14.6746	4.62911		7.33483	0.207877
14.6846	4.61889		7.33983	0.207657
14.6946	4.59976		7.34482	0.209629
14.7046	4.58181		7.34982	0.209119
14.7145	4.56447		7.35482	0.209183
14.7245	4.54907		7.35982	0.211221
14.7345	4.53408		7.36482	0.213844
14.7445	4.5247		7.36981	0.214337
14.7545	4.5128		7.37481	0.216358
14.7645	4.50108		7.37981	0.217878
14.7745	4.48683		7.38481	0.216855
14.7845	4.46937		7.3898	0.218348
14.7945	4.45418		7.3948	0.219555
14.8045	4.44892		7.3998	0.219718
14.8145	4.44286		7.4048	0.220538
14.8245	4.43463		7.40979	0.220063
14.8345	4.4235		7.41479	0.218467
14.8445	4.41431		7.41979	0.216663
14.8545	4.4031		7.42479	0.215061
14.8645	4.39573		7.42978	0.215804
14.8745	4.39069		7.43478	0.216375
14.8845	4.3865		7.43978	0.217801
14.8945	4.38496		7.44478	0.22067
14.9045	4.3855		7.44978	0.223858
14.9145	4.38413		7.45477	0.2255
14.9245	4.38542		7.45977	0.2262
14.9345	4.39013		7.46477	0.22472
14.9445	4.38928		7.46977	0.221981
14.9544	4.3915		7.47476	0.219438
14.9644	4.3989		7.47976	0.219134
14.9744	4.40411		7.48476	0.218886
14.9844	4.4111		7.48976	0.216714
14.9944	4.41556		7.49475	0.215587
15.0044	4.4233		7.49975	0.216682
15.0144	4.42686		7.50475	0.215285
15.0244	4.43142		7.50975	0.216169
15.0344	4.43871		7.51474	0.217637
15.0444	4.45674		7.51974	0.220401
15.0544	4.47315		7.52474	0.220383
15.0644	4.48479		7.52974	0.219802
15.0744	4.49685		7.53474	0.22088
15.0844	4.51185		7.53973	0.223269
15.0944	4.52598		7.54473	0.224456
15.1044	4.54464		7.54973	0.225127
15.1144	4.56562		7.55473	0.225619
15.1244	4.58789		7.55972	0.226165
15.1344	4.60839		7.56472	0.226046
15.1444	4.63006		7.56972	0.224588
15.1544	4.6528		7.57472	0.223092
15.1644	4.67445		7.57971	0.22304
15.1744	4.69933		7.58471	0.220548
15.1844	4.72583		7.58971	0.22024
15.1943	4.75015		7.59471	0.218448
15.2043	4.77258		7.5997	0.218472
15.2143	4.79765		7.6047	0.218322
15.2243	4.82308		7.6097	0.219182
15.2343	4.84863		7.6147	0.220551
15.2443	4.87469		7.61969	0.223429
15.2543	4.90424		7.62469	0.224516
15.2643	4.93762		7.62969	0.225451
15.2743	4.97328		7.63469	0.227587
15.2843	5.00483		7.63969	0.227311
15.2943	5.03456		7.64468	0.228094
15.3043	5.0652		7.64968	0.228895
15.3143	5.09696		7.65468	0.229115
15.3243	5.13176		7.65968	0.227353
15.3343	5.16615		7.66467	0.225242
15.3443	5.20018		7.66967	0.223563
15.3543	5.23225		7.67467	0.224817
15.3643	5.26861		7.67967	0.22846
15.3743	5.30466		7.68466	0.231255
15.3843	5.33254		7.68966	0.235901
15.3943	5.36472		7.69466	0.240168
15.4043	5.40603		7.69966	0.240019
15.4143	5.44932		7.70465	0.23709
15.4243	5.49135		7.70965	0.235565
15.4343	5.53176		7.71465	0.232393
15.4442	5.57052		7.71965	0.227404
15.4542	5.60768		7.72465	0.226602
15.4642	5.64506		7.72964	0.228377
15.4742	5.68351		7.73464	0.232149
15.4842	5.72327		7.73964	0.233171
15.4942	5.7654		7.74464	0.234897
15.5042	5.80673		7.74963	0.234686
15.5142	5.84441		7.75463	0.236409
15.5242	5.88434		7.75963	0.234066
15.5342	5.93151		7.76463	0.23504
15.5442	5.977		7.76962	0.235831
15.5542	6.01815		7.77462	0.236028
15.5642	6.0581		7.77962	0.234305
15.5742	6.09941		7.78462	0.234716
15.5842	6.14805		7.78961	0.234428
15.5942	6.1965		7.79461	0.235303
15.6042	6.23751		7.79961	0.237606
15.6142	6.28475		7.80461	0.239526
15.6242	6.33478		7.80961	0.23933
15.6342	6.38874		7.8146	0.241429
15.6442	6.44117		7.8196	0.243297
15.6542	6.49368		7.8246	0.24284
15.6642	6.54547		7.8296	0.243255
15.6742	6.5996		7.83459	0.24219
15.6841	6.65535		7.83959	0.239224
15.6941	6.71638		7.84459	0.236329
15.7041	6.77197		7.84959	0.234655
15.7141	6.83126		7.85458	0.231989
15.7241	6.89578		7.85958	0.232455
15.7341	6.96728		7.86458	0.235961
15.7441	7.0405		7.86958	0.23769
15.7541	7.11462		7.87457	0.239496
15.7641	7.19451		7.87957	0.240339
15.7741	7.2803		7.88457	0.241024
15.7841	7.36937		7.88957	0.238455
15.7941	7.45937		7.89457	0.239077
15.8041	7.55375		7.89956	0.241949
15.8141	7.65925		7.90456	0.244241
15.8241	7.77455		7.90956	0.245102
15.8341	7.89309		7.91456	0.247908
15.8441	8.01538		7.91955	0.248598
15.8541	8.14777		7.92455	0.246836
15.8641	8.28789		7.92955	0.246573
15.8741	8.43942		7.93455	0.250439
15.8841	8.60231		7.93954	0.252446
15.8941	8.7738		7.94454	0.253114
15.9041	8.961		7.94954	0.257939
15.9141	9.16548		7.95454	0.257691
15.924	9.37758		7.95953	0.254366
15.934	9.60109		7.96453	0.251597
15.944	9.84248		7.96953	0.250062
15.954	10.1035		7.97453	0.245358
15.964	10.3834		7.97953	0.244557
15.974	10.6822		7.98452	0.244556
15.984	11.0003		7.98952	0.245624
15.994	11.329		7.99452	0.245913
16.004	11.6859		7.99952	0.247115
16.014	12.0719		8.00451	0.247127
16.024	12.4822		8.00951	0.246906
16.034	12.9135		8.01451	0.244575
16.044	13.3707		8.01951	0.245271
16.054	13.8501		8.0245	0.244369
16.064	14.3546		8.0295	0.243816
16.074	14.8956		8.0345	0.243928
16.084	15.4759		8.0395	0.245601
16.094	16.0851		8.04449	0.246465
16.104	16.7157		8.04949	0.24876
16.114	17.3783		8.05449	0.249071
16.124	18.0788		8.05949	0.247214
16.134	18.8112		8.06448	0.246221
16.144	19.5802		8.06948	0.243707
16.154	20.382		8.07448	0.240129
16.164	21.2229		8.07948	0.240749
16.1739	22.1		8.08448	0.245488
16.1839	23.0099		8.08947	0.247533
16.1939	23.9552		8.09447	0.251405
16.2039	24.9339		8.09947	0.255444
16.2139	25.9459		8.10447	0.256938
16.2239	26.9975		8.10946	0.256462
16.2339	28.0825		8.11446	0.257909
16.2439	29.2035		8.11946	0.257283
16.2539	30.3578		8.12446	0.255474
16.2639	31.5258		8.12945	0.25676
16.2739	32.7308		8.13445	0.258593
16.2839	33.9626		8.13945	0.256837
16.2939	35.2227		8.14445	0.257268
16.3039	36.5085		8.14944	0.257075
16.3139	37.8174		8.15444	0.254232
16.3239	39.141		8.15944	0.253227
16.3339	40.4847		8.16444	0.254602
16.3439	41.8525		8.16944	0.257133
16.3539	43.2434		8.17443	0.257691
16.3639	44.6235		8.17943	0.259873
16.3739	45.9992		8.18443	0.258909
16.3839	47.3892		8.18943	0.259139
16.3939	48.7856		8.19442	0.259958
16.4039	50.1718		8.19942	0.263077
16.4138	51.5489		8.20442	0.262099
16.4238	52.9068		8.20942	0.26298
16.4338	54.2538		8.21441	0.264163
16.4438	55.5775		8.21941	0.258965
16.4538	56.8779		8.22441	0.256119
16.4638	58.1553		8.22941	0.255812
16.4738	59.3959		8.2344	0.255398
16.4838	60.6014		8.2394	0.253672
16.4938	61.7757		8.2444	0.255565
16.5038	62.9045		8.2494	0.255724
16.5138	63.9764		8.2544	0.256307
16.5238	64.9973		8.25939	0.256096
16.5338	65.9611		8.26439	0.255184
16.5438	66.8716		8.26939	0.253512
16.5538	67.7173		8.27439	0.25524
16.5638	68.5067		8.27938	0.258038
16.5738	69.2302		8.28438	0.256969
16.5838	69.8757		8.28938	0.253872
16.5938	70.4469		8.29438	0.254977
16.6038	70.9421		8.29937	0.25356
16.6138	71.3654		8.30437	0.252717
16.6238	71.7143		8.30937	0.254213
16.6338	71.9876		8.31437	0.259946
16.6438	72.1844		8.31936	0.261157
16.6538	72.2981		8.32436	0.261008
16.6637	72.3358		8.32936	0.259522
16.6737	72.3043		8.33436	0.256586
16.6837	72.1968		8.33936	0.255084
16.6937	72.0085		8.34435	0.254936
16.7037	71.7431		8.34935	0.255996
16.7137	71.4072		8.35435	0.255397
16.7237	70.9996		8.35935	0.257671
16.7337	70.5283		8.36434	0.258057
16.7437	69.9978		8.36934	0.257504
16.7537	69.4036		8.37434	0.256952
16.7637	68.7363		8.37934	0.257051
16.7737	68.0052		8.38433	0.256099
16.7837	67.2267		8.38933	0.256903
16.7937	66.4073		8.39433	0.25952
16.8037	65.5381		8.39933	0.261559
16.8137	64.6107		8.40432	0.263954
16.8237	63.6366		8.40932	0.267591
16.8337	62.63		8.41432	0.268229
16.8437	61.5972		8.41932	0.266546
16.8537	60.5463		8.42431	0.264992
16.8637	59.4526		8.42931	0.26325
16.8737	58.3264		8.43431	0.261344
16.8837	57.1715		8.43931	0.259988
16.8937	56.005		8.44431	0.260462
16.9036	54.8352		8.4493	0.262063
16.9136	53.6417		8.4543	0.261885
16.9236	52.4281		8.4593	0.262248
16.9336	51.2027		8.4643	0.263675
16.9436	49.9799		8.46929	0.263608
16.9536	48.7602		8.47429	0.262921
16.9636	47.5465		8.47929	0.263884
16.9736	46.3286		8.48429	0.264539
16.9836	45.1091		8.48928	0.264071
16.9936	43.8909		8.49428	0.265607
17.0036	42.6807		8.49928	0.265068
17.0136	41.4876		8.50428	0.264223
17.0236	40.2979		8.50927	0.263128
17.0336	39.1174		8.51427	0.2634
17.0436	37.9501		8.51927	0.262519
17.0536	36.7935		8.52427	0.263397
17.0636	35.6586		8.52927	0.265097
17.0736	34.5425		8.53426	0.268111
17.0836	33.4457		8.53926	0.269258
17.0936	32.3547		8.54426	0.270095
17.1036	31.2799		8.54926	0.270093
17.1136	30.2392		8.55425	0.270412
17.1236	29.2237		8.55925	0.268894
17.1336	28.22		8.56425	0.266538
17.1435	27.2365		8.56925	0.265372
17.1535	26.2745		8.57424	0.266596
17.1635	25.3359		8.57924	0.266457
17.1735	24.4273		8.58424	0.266772
17.1835	23.5346		8.58924	0.268721
17.1935	22.6635		8.59423	0.268928
17.2035	21.8151		8.59923	0.268972
17.2135	20.9854		8.60423	0.270673
17.2235	20.1831		8.60923	0.271682
17.2335	19.4011		8.61423	0.27265
17.2435	18.6369		8.61922	0.273869
17.2535	17.898		8.62422	0.27261
17.2635	17.1809		8.62922	0.271459
17.2735	16.4825		8.63422	0.268048
17.2835	15.8094		8.63921	0.266885
17.2935	15.1573		8.64421	0.266931
17.3035	14.529		8.64921	0.268206
17.3135	13.9171		8.65421	0.270248
17.3235	13.3248		8.6592	0.272971
17.3335	12.7584		8.6642	0.271317
17.3435	12.203		8.6692	0.270051
17.3535	11.6658		8.6742	0.268257
17.3635	11.152		8.67919	0.266066
17.3735	10.6609		8.68419	0.266722
17.3835	10.1885		8.68919	0.26826
17.3934	9.7341		8.69419	0.270154
17.4034	9.29669		8.69919	0.2724
17.4134	8.87585		8.70418	0.275006
17.4234	8.46503		8.70918	0.274406
17.4334	8.07469		8.71418	0.276685
17.4434	7.70113		8.71918	0.27671
17.4534	7.34168		8.72417	0.274317
17.4634	6.99553		8.72917	0.272356
17.4734	6.66266		8.73417	0.273777
17.4834	6.34575		8.73917	0.275347
17.4934	6.04716		8.74416	0.277168
17.5034	5.7613		8.74916	0.280547
17.5134	5.48672		8.75416	0.281774
17.5234	5.22445		8.75916	0.28094
17.5334	4.97111		8.76415	0.278766
17.5434	4.73024		8.76915	0.27693
17.5534	4.5018		8.77415	0.276586
17.5634	4.28461		8.77915	0.275918
17.5734	4.07808		8.78415	0.275787
17.5834	3.87875		8.78914	0.274386
17.5934	3.68955		8.79414	0.272244
17.6034	3.51133		8.79914	0.271378
17.6134	3.34498		8.80414	0.270331
17.6234	3.18491		8.80913	0.270303
17.6333	3.0304		8.81413	0.271279
17.6433	2.8875		8.81913	0.272306
17.6533	2.75393		8.82413	0.272003
17.6633	2.62007		8.82912	0.274149
17.6733	2.4933		8.83412	0.27689
17.6833	2.37175		8.83912	0.277881
17.6933	2.25668		8.84412	0.279254
17.7033	2.15002		8.84911	0.281787
17.7133	2.05391		8.85411	0.279362
17.7233	1.95934		8.85911	0.278774
17.7333	1.87056		8.86411	0.279539
17.7433	1.78151		8.8691	0.279094
17.7533	1.70114		8.8741	0.277332
17.7633	1.62939		8.8791	0.279695
17.7733	1.5576		8.8841	0.279121
17.7833	1.48851		8.8891	0.276559
17.7933	1.42368		8.89409	0.277007
17.8033	1.36422		8.89909	0.277637
17.8133	1.30324		8.90409	0.277459
17.8233	1.2498		8.90909	0.2746
17.8333	1.2012		8.91408	0.274859
17.8433	1.15087		8.91908	0.275057
17.8533	1.09674		8.92408	0.273719
17.8633	1.04983		8.92908	0.271878
17.8732	1.00976		8.93407	0.274706
17.8832	0.969883		8.93907	0.277752
17.8932	0.925771		8.94407	0.279401
17.9032	0.888164		8.94907	0.282497
17.9132	0.855084		8.95406	0.284759
17.9232	0.824425		8.95906	0.283445
17.9332	0.791928		8.96406	0.28169
17.9432	0.766475		8.96906	0.280435
17.9532	0.73914		8.97406	0.278446
17.9632	0.70908		8.97905	0.278904
17.9732	0.679629		8.98405	0.280347
17.9832	0.652993		8.98905	0.282727
17.9932	0.628777		8.99405	0.285176
18.0032	0.607858		8.99904	0.286333
18.0132	0.586843		9.00404	0.287312
18.0232	0.563273		9.00904	0.287829
18.0332	0.539327		9.01404	0.289311
18.0432	0.518115		9.01903	0.28784
18.0532	0.499626		9.02403	0.285447
18.0632	0.481035		9.02903	0.28244
18.0732	0.462716		9.03403	0.282973
18.0832	0.446152		9.03902	0.280449
18.0932	0.428088		9.04402	0.279078
18.1032	0.410329		9.04902	0.283096
18.1132	0.392953		9.05402	0.288232
18.1231	0.376818		9.05902	0.288337
18.1331	0.363724		9.06401	0.288231
18.1431	0.350011		9.06901	0.288933
18.1531	0.338388		9.07401	0.287443
18.1631	0.326139		9.07901	0.284202
18.1731	0.311264		9.084	0.28274
18.1831	0.296586		9.089	0.284003
18.1931	0.281885		9.094	0.284903
18.2031	0.269116		9.099	0.286281
18.2131	0.254323		9.10399	0.288358
18.2231	0.24332		9.10899	0.292118
18.2331	0.229812		9.11399	0.294409
18.2431	0.217574		9.11899	0.295484
18.2531	0.203456		9.12398	0.293293
18.2631	0.192217		9.12898	0.292743
18.2731	0.178464		9.13398	0.290407
18.2831	0.165155		9.13898	0.28794
18.2931	0.155011		9.14398	0.287666
18.3031	0.147466		9.14897	0.289111
18.3131	0.13632		9.15397	0.289613
18.3231	0.1254		9.15897	0.291538
18.3331	0.119216		9.16397	0.290537
18.3431	0.11025		9.16896	0.290976
18.3531	0.0976455		9.17396	0.293343
18.363	0.0871572		9.17896	0.294601
18.373	0.0808223		9.18396	0.294634
18.383	0.0707051		9.18895	0.296878
18.393	0.0612893		9.19395	0.296709
18.403	0.0526952		9.19895	0.295902
18.413	0.041403		9.20395	0.2942
18.423	0.0338739		9.20894	0.293857
18.433	0.0259385		9.21394	0.296333
18.443	0.0214748		9.21894	0.299148
18.453	0.0144922		9.22394	0.30111
18.463	0.0089571		9.22894	0.305362
18.473	-0.0008104		9.23393	0.309444
18.483	-0.0158854		9.23893	0.309834
18.493	-0.0208668		9.24393	0.307901
18.503	-0.0225591		9.24893	0.307055
18.513	-0.0277359		9.25392	0.304743
18.523	-0.0374668		9.25892	0.299355
18.533	-0.0468623		9.26392	0.29732
18.543	-0.0561984		9.26892	0.297876
18.553	-0.0662329		9.27391	0.297574
18.563	-0.0748338		9.27891	0.295609
18.573	-0.0815866		9.28391	0.295837
18.583	-0.0897428		9.28891	0.295001
18.593	-0.0946437		9.2939	0.292845
18.6029	-0.0991283		9.2989	0.292893
18.6129	-0.102663		9.3039	0.293709
18.6229	-0.104472		9.3089	0.294821
18.6329	-0.109216		9.3139	0.296132
18.6429	-0.117586		9.31889	0.2991
18.6529	-0.124427		9.32389	0.300449
18.6629	-0.127838		9.32889	0.30053
18.6729	-0.130247		9.33389	0.299583
18.6829	-0.134846		9.33888	0.29604
18.6929	-0.145326		9.34388	0.293777
18.7029	-0.1516		9.34888	0.29334
18.7129	-0.157426		9.35388	0.293318
18.7229	-0.162294		9.35887	0.29483
18.7329	-0.167701		9.36387	0.298843
18.7429	-0.171576		9.36887	0.299606
18.7529	-0.174594		9.37387	0.298893
18.7629	-0.178929		9.37886	0.300391
18.7729	-0.184877		9.38386	0.301561
18.7829	-0.188993		9.38886	0.300859
18.7929	-0.191328		9.39386	0.302315
18.8029	-0.196191		9.39885	0.303685
18.8129	-0.199793		9.40385	0.302993
18.8229	-0.204167		9.40885	0.301227
18.8329	-0.212416		9.41385	0.30243
18.8429	-0.217152		9.41885	0.30351
18.8528	-0.217794		9.42384	0.304032
18.8628	-0.216812		9.42884	0.305639
18.8728	-0.218605		9.43384	0.308257
18.8828	-0.223703		9.43884	0.307965
18.8928	-0.228753		9.44383	0.30541
18.9028	-0.230789		9.44883	0.304474
18.9128	-0.232535		9.45383	0.305422
18.9228	-0.234113		9.45883	0.306595
18.9328	-0.237287		9.46382	0.305796
18.9428	-0.242122		9.46882	0.308183
18.9528	-0.248418		9.47382	0.307288
18.9628	-0.247426		9.47882	0.305377
18.9728	-0.248646		9.48381	0.302234
18.9828	-0.254854		9.48881	0.302895
18.9928	-0.261237		9.49381	0.302653
19.0028	-0.264729		9.49881	0.304301
19.0128	-0.268203		9.50381	0.306686
19.0228	-0.266547		9.5088	0.307736
19.0328	-0.266203		9.5138	0.308177
19.0428	-0.268167		9.5188	0.307524
19.0528	-0.272705		9.5238	0.305344
19.0628	-0.279159		9.52879	0.304463
19.0728	-0.285182		9.53379	0.305886
19.0828	-0.285648		9.53879	0.305655
19.0927	-0.283368		9.54379	0.304972
19.1027	-0.286888		9.54878	0.306418
19.1127	-0.290141		9.55378	0.305986
19.1227	-0.293074		9.55878	0.304262
19.1327	-0.291558		9.56378	0.303395
19.1427	-0.28996		9.56877	0.304551
19.1527	-0.28969		9.57377	0.304829
19.1627	-0.293195		9.57877	0.305065
19.1727	-0.292865		9.58377	0.306039
19.1827	-0.29386		9.58877	0.304952
19.1927	-0.296197		9.59376	0.307063
19.2027	-0.302335		9.59876	0.30821
19.2127	-0.305191		9.60376	0.309357
19.2227	-0.303666		9.60876	0.308499
19.2327	-0.302569		9.61375	0.31058
19.2427	-0.303631		9.61875	0.308581
19.2527	-0.305307		9.62375	0.307267
19.2627	-0.306694		9.62875	0.306498
19.2727	-0.306508		9.63374	0.30878
19.2827	-0.308827		9.63874	0.309667
19.2927	-0.311623		9.64374	0.310738
19.3027	-0.313646		9.64874	0.310706
19.3127	-0.316088		9.65373	0.31126
19.3227	-0.315581		9.65873	0.310972
19.3327	-0.31452		9.66373	0.31098
19.3426	-0.317458		9.66873	0.310752
19.3526	-0.323712		9.67373	0.310456
19.3626	-0.32434		9.67872	0.309103
19.3726	-0.323437		9.68372	0.30955
19.3826	-0.325919		9.68872	0.309479
19.3926	-0.329734		9.69372	0.308214
19.4026	-0.332793		9.69871	0.308287
19.4126	-0.330108		9.70371	0.310021
19.4226	-0.329511		9.70871	0.311798
19.4326	-0.330509		9.71371	0.312119
19.4426	-0.332896		9.7187	0.31175
19.4526	-0.33068		9.7237	0.312331
19.4626	-0.333654		9.7287	0.308637
19.4726	-0.334317		9.7337	0.305139
19.4826	-0.32991		9.73869	0.305343
19.4926	-0.326106		9.74369	0.307429
19.5026	-0.329279		9.74869	0.305167
19.5126	-0.332849		9.75369	0.306358
19.5226	-0.335212		9.75869	0.308965
19.5326	-0.338687		9.76368	0.308503
19.5426	-0.344552		9.76868	0.307797
19.5526	-0.344732		9.77368	0.313308
19.5626	-0.341701		9.77867	0.31547
19.5726	-0.338896		9.78367	0.311464
19.5825	-0.337651		9.78867	0.3112
19.5925	-0.338297		9.79367	0.312054
19.6025	-0.345295		9.79867	0.310132
19.6125	-0.348442		9.80366	0.311413
19.6225	-0.34947		9.80866	0.312583
19.6325	-0.350167		9.81366	0.312737
19.6425	-0.350297		9.81866	0.314323
19.6525	-0.348247		9.82365	0.313343
19.6625	-0.351483		9.82865	0.310606
19.6725	-0.354101		9.83365	0.311354
19.6825	-0.353567		9.83865	0.31508
19.6925	-0.350325		9.84364	0.312583
19.7025	-0.352132		9.84864	0.311755
19.7125	-0.355937		9.85364	0.313087
19.7225	-0.357355		9.85864	0.314177
19.7325	-0.35647		9.86364	0.31162
19.7425	-0.356497		9.86863	0.315705
19.7525	-0.358527		9.87363	0.320138
19.7625	-0.361456		9.87863	0.320998
19.7725	-0.362566		9.88363	0.32283
19.7825	-0.357841		9.88862	0.322265
19.7925	-0.356853		9.89362	0.320083
19.8025	-0.362025		9.89862	0.318919
19.8125	-0.364477		9.90362	0.317825
19.8224	-0.365099		9.90861	0.316155
19.8324	-0.365067		9.91361	0.316066
19.8424	-0.364958		9.91861	0.316147
19.8524	-0.363716		9.92361	0.314114
19.8624	-0.362132		9.9286	0.314302
19.8724	-0.358944		9.9336	0.314999
19.8824	-0.357623		9.9386	0.315902
19.8924	-0.363517		9.9436	0.316107
19.9024	-0.365088		9.9486	0.317254
19.9124	-0.36872		9.95359	0.317949
19.9224	-0.369447		9.95859	0.320782
19.9324	-0.371244		9.96359	0.323157
19.9424	-0.371359		9.96859	0.323385
19.9524	-0.373508		9.97358	0.324393
[truncated: 2,247 more rows]
