# Supplementary material for: Association with TFIIIC limits MYCN localisation in hubs of active promoters and chromatin accumulation of non-phosphorylated RNA polymerase II
Source: eLife journal article supplement (doi:10.7554/elife.94407), 2024-02-07
Supplement: fig1-data5 [file SourceData_Fig1E.xlsx]

## Sheet: TFIIIC2
Time [h]	EtOH/EtOH			Dox/EtOH			EtOH/OHT			Dox/OHT
0	1.97725	1.38406	1.68626	1.78361	1.43357	1.80847	1.79221	1.85171	1.85245	2.07752	2.56664	1.60587
6	2.71391	1.75621	2.00199	2.2946	1.98751	2.10878	2.36332	2.39225	2.41786	2.69057	2.96436	2.04614
12	3.24953	2.31934	2.37861	2.73583	2.40972	2.64497	2.9183	3.15524	2.89196	3.35033	3.18742	2.60898
18	3.97287	2.81351	3.33483	3.53285	3.05702	3.48701	3.69448	3.52811	3.92699	4.1692	4.24521	3.04945
24	4.9524	3.40633	3.67558	3.86307	3.62837	4.09868	4.5473	4.41054	4.55373	4.65849	5.50436	3.60674
30	6.10947	3.66059	4.32458	5.05279	4.38	4.93278	5.05187	5.4192	5.00862	5.77082	6.21107	4.39057
36	7.50285	5.0016	5.84969	6.31238	5.28868	5.89188	6.40729	6.54689	7.13742	7.33965	7.13556	5.60238
42	9.11858	6.0587	7.44245	7.18794	6.58151	7.12981	7.50606	7.97844	8.52979	8.35645	9.53517	6.9199
48	11.2375	7.67073	9.19626	8.26055	7.24037	8.66327	8.84619	9.88965	9.97222	9.63185	11.7393	8.1847
54	14.3106	10.0065	11.9323	10.909	9.4256	10.4845	11.6398	13.2539	13.6204	12.1781	13.6554	10.4234
60	18.2663	11.9222	14.5074	12.0953	10.9713	12.5546	14.2128	15.5053	16.6181	13.8763	17.4851	11.5957
66	21.9219	15.7881	18.2552	15.3519	13.1776	15.0478	16.8956	19.3589	20.9146	14.9651	19.4403	12.9695
72	27.7454	20.0097	22.1588	18.5457	15.8493	16.99	21.7101	25.4424	26.4319	17.1576	22.9764	15.1017
78	34.8895	25.2594	28.9119	20.5562	18.4355	20.105	26.4073	32.3135	32.3723	18.2633	24.2731	16.1651
84	42.8175	32.3062	35.128	23.2536	21.8571	23.1535	31.7975	39.8277	39.8274	19.1964	25.0271	16.7443
90	52.0896	42.2161	44.4382	26.8815	24.2935	27.0035	38.3439	50.3416	49.514	20.0383	27.6282	18.175
96	62.4632	53.1859	56.4623	31.2696	28.1293	30.2332	46.34	59.5594	59.0538	19.7427	29.5543	18.6978
102	72.3616	64.496	68.8227	33.7391	31.7583	33.2474	54.3191	70.5527	69.7135	19.7238	30.4746	19.5394
108	82.3187	75.9218	81.7606	37.5628	36.501	36.3271	62.5742	81.3534	80.5121	19.9883	32.5551	20.3817
114	91.0708	88.2035	92.9856	42.8787	41.1041	40.459	71.3466	88.8612	88.1759	19.1588	34.318	21.2594
120	97.1899	95.9975	98.3899	46.6486	45.7021	45.167	79.5855	94.0723	93.9152	19.7198	36.3024	21.8387
126	98.4909	98.391	99.2032	52.0189	52.7535	48.4989	86.033	96.5401	97.7291	21.5315	37.9324	24.9234
132	99.3615	99.3516	99.7538	57.721	56.0896	53.5738	92.0602	97.6924	99.6169	21.3786	37.9715	24.5027
138	99.7632	99.7876	99.8941	62.7525	61.91	59.1699	96.7335	99.0459	99.8998	20.9045	39.923	24.762
144	99.8868	99.8966	99.9687	68.0652	66.8647	63.8659	98.7483	99.8273	99.9679	20.8275	42.5767	26.1132
150	99.954	99.981	99.9755	75.4306	71.7064	69.433	99.4139	99.9604	99.9745	20.4627	44.4999	26.2245
156	99.98	99.9922	99.995	79.1561	75.6933	74.187	99.7806	99.9742	99.9883	20.4888	46.807	26.9158
162	99.991	99.988	99.9945	83.0693	79.9944	78.5508	99.8905	99.9907	99.993	20.2051	48.6305	27.7506
168	99.9923	99.9823	99.9978	85.7903	82.3339	82.2384	99.9053	99.9966	99.9939	20.3152	51.5034	28.3125
174	99.9955	99.9869	99.9973	88.1047	85.4074	85.2557	99.8654	99.9942	99.9819	20.1423	54.8624	29.1382
180	99.9978	99.9931	99.9972	90.6278	88.0474	88.8653	99.8607	99.9915	99.9709	19.7919	58.1602	29.7568
186	99.9963	99.9918	99.9997	91.314	89.8174	90.931	99.8571	99.9957	99.9705	20.015	61.8302	30.8563
192	99.9917	99.994	99.9996	93.4283	90.2515	91.1416	99.8271	99.9946	99.959	19.7582	64.3533	30.5747
198	99.9981	99.9783	100	93.7996	92.2828	93.6187	99.805	99.9914	99.9833	19.4087	68.443	32.1475
204	99.9927	99.955	99.9998	94.0201	92.5232	93.6626	99.8134	99.9866	99.9798	19.2103	70.4422	33.1371
210	99.9974	99.9408	100	94.3205	92.4771	93.6191	99.7976	99.9877	99.9689	18.8302	73.6568	35.0626
216	99.9997	99.8945	100	93.8495	92.4831	93.0008	99.8071	99.9861	99.9967	18.968	75.2083	36.5194

## Sheet: TFIIIC3
Time [h]	EtOH/EtOH			Dox/EtOH			EtOH/OHT			Dox/OHT
0	1.87529	2.13691	1.76	2.24435	2.18986	1.63596	1.82061	1.9831	2.22424	2.13954	1.97144	2.41363
6	2.40794	2.79932	2.25	2.80704	2.67365	2.02217	2.45122	2.56022	2.69543	2.68647	2.50773	2.64814
12	2.9226	3.16471	2.71916	3.57323	3.30647	2.43384	3.07423	3.13881	3.04003	3.14752	3.03856	3.41433
18	3.44698	3.65707	3.06323	4.17562	3.67997	2.97235	3.90753	3.76338	3.65827	3.84487	3.91455	4.21711
24	4.10626	4.45475	3.66295	5.03864	4.59099	3.48669	4.24359	4.51867	4.21334	4.4015	4.70469	4.84394
30	5.06831	5.31747	4.67073	6.50541	5.70587	4.0918	5.25246	5.42748	5.15685	5.46073	5.9626	6.00369
36	6.02529	6.12296	5.07169	7.10724	6.95567	4.71693	6.73895	6.79805	6.46124	7.20683	7.64819	7.37451
42	7.6032	8.27124	6.31231	9.55986	8.12496	5.9203	8.54304	8.71831	8.27891	8.40052	9.10769	8.89996
48	9.46941	9.87084	7.4515	10.8112	10.4233	7.13546	11.1439	10.7862	9.34816	10.0107	11.3526	10.9442
54	11.6404	12.6589	9.45036	12.969	12.1181	8.04964	13.2877	13.0042	11.903	12.6363	14.4791	13.0121
60	14.4431	15.4434	11.4619	16.1743	14.7818	9.92953	16.8058	16.4727	14.6316	14.7892	16.5696	14.8323
66	17.8479	19.6184	14.0204	19.332	18.2232	11.8099	21.0467	20.9028	17.337	17.3797	19.7566	16.3971
72	23.8781	25.2852	17.9878	23.1138	20.3444	14.0157	26.1042	25.1927	21.53	19.612	22.1956	18.306
78	29.0562	30.7267	21.7076	26.9701	22.8803	15.891	31.7974	31.9144	25.3366	21.2935	24.0657	19.8153
84	36.1892	37.5352	25.9868	30.1732	26.3149	17.9555	36.6175	37.9119	29.1416	22.9397	25.3586	20.922
90	45.7618	45.7175	32.5065	35.0505	28.8452	20.4082	45.4943	45.6091	34.7317	24.1182	28.7702	21.9542
96	55.5851	55.2243	41.0628	39.6548	32.5004	23.6759	54.5905	54.8346	41.3434	25.7242	31.1637	22.9393
102	68.0461	68.4109	50.4045	45.9622	37.0059	26.775	62.7328	64.243	46.8196	26.9505	32.5138	23.5645
108	81.2081	79.8033	61.6217	51.9109	41.0328	30.1014	72.8117	72.7508	54.7521	28.9866	33.7689	24.0921
114	92.129	90.1268	74.841	57.0445	46.7124	34.6391	81.5926	81.3772	62.5991	31.1532	36.151	24.718
120	97.4472	96.9228	85.4345	62.0423	52.5818	39.7114	88.231	87.0975	69.1978	32.9881	37.8932	24.6289
126	99.1068	98.1801	93.0828	68.9807	59.9445	46.1142	93.4371	91.6119	76.2974	35.6825	41.6446	28.1928
132	99.6303	99.3606	97.9724	75.5576	68.1136	51.8567	97.2067	95.03	82.2195	37.8951	43.9237	28.4907
138	99.8771	99.7779	99.5463	81.5558	74.9031	58.0593	98.7303	97.8887	88.1369	39.6792	47.6313	27.7034
144	99.9616	99.9125	99.8347	87.1002	82.3653	65.0944	99.8342	99.4884	92.4858	43.0858	51.9768	27.6958
150	99.9813	99.9676	99.93	89.7127	87.3313	71.2876	99.9649	99.9377	95.6527	44.1553	54.2679	27.1714
156	99.9805	99.9564	99.9387	93.1412	92.3426	78.7759	99.9836	99.9775	97.4628	46.8152	56.6989	26.9236
162	99.9931	99.968	99.9845	95.0233	94.4374	85.2291	99.9754	99.9633	98.4557	50.2416	58.8647	26.3383
168	99.9887	99.9824	99.9495	96.6462	96.1701	90.7146	99.9872	99.9733	99.2691	52.6785	61.6324	26.2069
174	99.9898	99.9879	99.9653	97.4918	97.2438	93.6704	99.9784	99.9545	99.6566	55.631	63.917	25.5255
180	99.9894	99.9837	99.9556	98.262	98.1717	95.6194	99.9835	99.9628	99.551	56.8521	64.8805	25.0752
186	99.9932	99.9882	99.8976	98.7766	98.6852	96.6395	99.9887	99.9414	99.4573	60.5054	66.8554	24.4709
192	99.9892	99.9861	99.9369	98.6027	98.6144	97.4992	99.9521	99.9093	99.557	60.9525	65.7275	23.9291
198	99.9787	99.9928	99.9466	99.1497	99.0132	98.0961	99.9892	99.9464	99.482	64.4864	68.1196	23.6484
204	99.9944	99.9881	99.956	99.1399	99.1218	98.3462	99.9878	99.9651	99.3333	66.1192	68.6728	22.8439
210	99.9897	99.9887	99.9332	99.0831	99.0811	98.4798	99.9796	99.9733	99.1351	67.3274	68.5927	22.8825
216	99.9964	99.9981	99.9418	99.0137	99.1242	98.4674	99.9856	99.9765	99.2438	66.9583	68.9208	22.9621

## Sheet: TFIIIC5
Time [h]	EtOH/EtOH			Dox/EtOH			EtOH/OHT			Dox/OHT
0	3.97196	3.76897	3.52051	3.80735	3.81189	3.99774	4.00188	3.98098	3.79748	3.77027	4.42236	3.85061
6	5.00825	4.75723	4.42887	4.70275	4.41729	4.91809	4.73506	4.75882	4.5682	4.53875	5.66394	4.77331
12	5.85611	5.38452	5.00929	5.81569	5.13262	5.80493	5.68778	5.67258	5.19885	5.31568	6.50922	5.6314
18	6.5633	5.96413	5.83044	6.63308	6.00075	6.4715	6.88618	6.6548	6.41352	5.98725	7.77466	6.90557
24	7.79136	7.10395	6.92118	7.68539	7.3644	7.97192	8.05051	7.96069	7.44834	7.35374	9.56951	7.93252
30	8.68992	8.05998	7.96499	9.02157	8.31684	9.57646	8.95279	9.07873	8.60816	8.83905	10.6703	9.22366
36	10.1345	8.98712	9.27572	10.5895	9.29148	11.0149	10.4818	10.5016	9.522	9.65339	12.2547	10.304
42	11.9208	10.6304	10.613	12.454	10.7006	12.6837	12.559	12.3544	11.8374	11.4673	14.5351	12.1417
48	13.5495	12.3474	12.5168	14.6056	12.9434	14.5933	14.5651	14.7867	13.8826	13.8825	16.8801	14.6298
54	16.783	14.3581	14.5619	16.9635	15.1129	17.9649	17.0554	17.1562	15.9143	15.4097	19.309	16.7359
60	20.0052	17.6664	17.3412	19.9498	17.7434	20.3813	20.6446	19.7053	18.6483	18.3167	22.8193	19.3776
66	23.4637	20.8368	20.644	23.2643	19.8059	23.1772	24.3217	23.4382	23.149	20.0236	24.8052	21.2476
72	27.9931	25.0723	24.5524	27.0432	22.7878	26.8265	28.3697	27.427	26.0436	22.6493	27.2294	24.8778
78	33.3539	29.6268	29.2157	31.7786	26.1376	31.1075	32.7076	32.1937	30.8634	24.9169	30.638	26.9857
84	39.1361	35.0771	35.2734	34.7739	30.331	35.0609	37.8134	37.4914	34.6754	27.5182	33.6804	27.9846
90	45.0901	41.9992	41.0059	39.9931	33.9987	38.9297	42.622	41.8378	39.5443	28.7117	35.4232	29.9931
96	54.4827	49.6593	48.7133	45.6888	38.5093	43.9513	49.8191	49.5986	44.3404	30.9776	38.8195	31.1594
102	63.4029	57.7815	58.3925	52.1121	43.5161	49.2818	56.614	55.6015	50.3781	32.6092	41.5531	32.8916
108	74.0868	67.836	68.9534	60.0167	48.4098	55.3143	63.722	62.7568	55.2881	34.5384	44.5857	33.6089
114	85.2375	77.4109	78.0897	66.5002	56.6268	61.2017	70.6134	69.4419	59.1928	35.3025	46.1196	34.6481
120	91.8547	86.1173	87.4692	74.2047	62.1198	66.8855	77.8517	75.8481	65.2258	37.954	49.8163	34.6232
126	95.9125	92.127	92.2077	81.7184	70.0236	73.8402	82.942	81.819	69.7987	39.5987	51.2301	35.9956
133	97.5903	95.1522	94.2278	85.7158	74.6697	78.8429	86.599	87.1106	72.785	40.1391	53.2044	36.8573
138	99.0176	97.8039	96.6444	90.443	81.0047	84.7263	90.3824	90.7975	76.3534	40.31	55.4676	36.7058
144	99.6245	99.1597	98.5014	94.3348	86.8885	89.5385	93.1792	93.6436	79.5524	41.8694	57.929	36.1701
150	99.8181	99.4106	99.5859	96.1099	90.2615	94.1902	95.1226	95.3767	83.485	43.3741	60.5744	35.4975
156	99.9667	99.8891	99.9161	98.2615	93.876	96.1917	96.6275	97.3238	86.3309	44.1763	62.0546	36.0245
162	99.9891	99.9408	99.9804	98.884	97.028	97.9551	97.5382	98.1344	89.4012	45.4422	64.9061	36.3332
168	99.993	99.9845	99.9839	99.4013	98.2402	98.4611	98.5203	98.8211	91.6457	46.9095	66.2108	36.5026
174	99.999	99.9898	99.9665	99.73	98.9498	98.8893	98.861	99.2701	93.5754	48.0386	67.3726	36.8937
180	99.9987	99.9964	99.9889	99.8099	99.005	99.0265	99.4099	99.4571	95.3493	49.4218	69.8776	37.4067
186	99.9987	99.9984	99.9861	99.8308	99.3367	99.2247	99.4705	99.5467	96.1169	50.0552	72.0249	37.4468
