# Supplementary material for: Association with TFIIIC limits MYCN localisation in hubs of active promoters and chromatin accumulation of non-phosphorylated RNA polymerase II
Source: eLife journal article supplement (doi:10.7554/elife.94407), 2024-02-07
Supplement: fig1-figsupp1-data3 [file Box-plot-ms-data.xlsx]

## Sheet: Sheet1
						Intact mass possible combinations (plotted)
	Intact masses detected (Not platted)					Combination number	Possible masses (kDa)
	Protein		Label	MW (Da)		1	204228
	TFIIIC6		A	25276.9		2	204308
			B	25355.4		3	204388
	TFIIIC5		C	59570.6		4	204309
			D	59649.9		5	204388
			E	59729.8		6	204468
						7	204467
	3xFLAGN-myc		A	18211		8	204547
			B	18291.3		9	204627
			C	18450.1		10	204467
			D	18370.7		11	204467
			E	18530.5		12	204547
						13	204548
	TFIIIC3		A	101170		14	204627
						15	204707
						16	204307
						17	204386
						18	204466
						19	204387
						20	204466
						21	204546			e
						22	204546
						23	204625
						24	204705
						25	204466
						26	204546
						27	204626
						28	204626
						29	204706
						30	204785
						Average mass	204509
						stdev mass	136.714
						Actual Native mass (Da)	204763

## Sheet: Sheet2
Combinations	1	204228				204.228
	2	204308				204.308
	3	204388				204.388
	4	204309				204.309
	5	204388				204.388
	6	204468				204.468
	7	204467				204.467
	8	204547				204.547
	9	204627				204.627
	10	204467				204.467
	11	204467				204.467
	12	204547				204.547
	13	204548				204.548
	14	204627				204.627
	15	204707				204.707
	16	204307				204.307
	17	204386				204.386
	18	204466				204.466
	19	204387				204.387
	20	204466				204.466
	21	204546				204.546
	22	204546				204.546
	23	204625				204.625
	24	204705				204.705
	25	204466				204.466
	26	204546				204.546
	27	204626				204.626
	28	204626				204.626
	29	204706				204.706
	30	204785				204.785
	Average mass	204509
	stdev mass	136.714
