# Supplementary material for: Association with TFIIIC limits MYCN localisation in hubs of active promoters and chromatin accumulation of non-phosphorylated RNA polymerase II
Source: eLife journal article supplement (doi:10.7554/elife.94407), 2024-02-07
Supplement: fig3-figsupp1-data1 [file SourceData_Fig3_S1.xlsx]

## Sheet: S3B
MYCN and MYC ChIP		enrichment over intergenic region
	EtOH (MYCN)			4-OHT (MYCN)			EtOH (MYC)			4-OHT (MYC)
NPM1	32.5788	29.0561	17.491	56.1059	51.7546	51.3807	5.35508	2.6244	4.95317	3.5157	3.3005	2.89644
TAF4B	23.4239	24.3638	17.3927	56.9963	54.4888	42.7546	2.31089	2.50286	1.48352	1.43918	1.60402	2.87144
NME1	15.7282	7.4585	10.281	27.6509	31.7651	34.4748	0.558842	1.67537	0.884949	2.42821	0.91375	0.455602
RPL22	12.2778	8.12349	12.0027	18.7904	17.7631	17.7043	1.72617	2.0713	1.37275	1.75719	1.17988	1.50028
PLD6	5.46709	5.15048	4.97836	11.1754	8.23156	8.88167	0.540638	0.7412	0.822586	1.30952	1.44267	1.21599
CCND2	0.687069	0.784915	0.49039	0.983203	0.819134	0.741969	0.532824	0.480898	0.836283	1.12252	1.03635	1.46538
intergenic	1.71797	0.891928	0.390106	0.798612	1.40681	0.794574	0.966022	1.23143	0.802549	0.495299	1.51462	0.990082
