# Supplementary material for: Association with TFIIIC limits MYCN localisation in hubs of active promoters and chromatin accumulation of non-phosphorylated RNA polymerase II
Source: eLife journal article supplement (doi:10.7554/elife.94407), 2024-02-07
Supplement: fig5-figsupp1-data1 [file SourceData_Fig5_S1.xlsx]

## Sheet: S5E
BRCA_ChIP (Fold Change (-/+ MYCN))
	+TFIIIC5			-TFIIIC5
NME1	11.5513	12.2294	15.9334	0.541465	0.603207	0.625508
TAF4B	13.4411	14.4976	10.8123	1.35324	0.688937	1.23129
NCL	9.11438	6.66585	10.9286	1.01105	1.43613	1.00762
TFAP4	7.54855	7.69457	8.12175	0.633157	0.654831	0.798589
NPM1	7.06379	6.86831	6.66139	1.04771	0.823684	1.06481
PLD6	4.73678	5.42352	9.89572	1.25925	0.980214	1.4789
EIF6	4.94464	4.16044	7.71046	1.13901	0.315602	0.599562
POLG	5.28427	4.45352	2.25321	0.69115	0.302815	0.370073
intergenic	1.66889	1.01071	0.690285	0.677489	0.18978	0.466788

## Sheet: S5D
Display	Row	Column	Timepoint	Time [s]	Field	Object ID	X	Y	Position X [µm]	Position Y [µm]	Bounding Box	Nuclei Selected Selected - Nucleus Area [µm²]	Nuclei Selected Selected - Nucleus Roundness	Nuclei Selected Selected - Object No in Nuclei	Nuclei Selected Selected - Object No in Nuclei Selected	Nuclei Selected Selected - Total Spot Area	Nuclei Selected Selected - Relative Spot Intensity	Nuclei Selected Selected - Number of Spots	Nuclei Selected Selected - Number of Spots per Area of Nucleus	Nuclei Selected Selected - Total Spot Area (2)	Nuclei Selected Selected - Relative Spot Intensity (2)	Nuclei Selected Selected - Number of Spots (2)	Nuclei Selected Selected - Number of Spots per Area of Cytoplasm	Nuclei Selected Selected - Number of Spots im Nucleus- per Cell	Nuclei Selected Selected - Intensity Spots im Nucleus Alexa 647 Mean- Mean pe...	Nuclei Selected Selected - Number of Spots im Cytoplasma- per Cell	Nuclei Selected Selected - Intensity Spots im Cytoplasma Alexa 647 Mean- Mean...	Compound	Concentration	Cell Type	Cell Count
True	B	9	0	0	1	1	945	26	122	153	[918,1,984,56]	127.9	0.9496	4	2	317	0.1475	29	0.02024	26	0.04338	2	0.001988	29	2891	2	1542						384 well	1	2	3	4	5	6	7	8	9	10	11	12	13	14	15	16
True	B	9	0	0	1	2	1014	51	142	145	[987,20,1046,82]	121.1	0.9458	5	3	394	0.1309	36	0.02653	39	0.05648	3	0.003386	36	2871	3	1293						A	PBS	PBS	PBS	PBS	PBS	PBS	PBS	PBS	PBS	PBS	PBS	PBS	PBS	PBS	PBS	PBS
True	B	9	0	0	1	3	1033	103	148	131	[1005,75,1069,137]	119.8	0.9665	6	4	538	0.1538	49	0.03651	31	0.01992	3	0.002515	49	3252	3	1631						B	PBS	PBS							RNAPII-TF3C5		RNAPII-TF3C5		RNAPII-TF3C5		RNAPII-TF3C5
True	B	9	0	0	1	4	1029	183	146	108	[1000,140,1060,210]	78.47	0.9529	8	6	170	0.1277	15	0.01706	43	0.02241	4	0.002861	15	2558	4	812						C	PBS	PBS
True	B	9	0	0	1	5	1019	232	144	92	[988,202,1050,268]	126.7	0.9705	10	8	434	0.1563	39	0.02748	13	0.03921	1	0.0007855	39	3809	1	2885						D	PBS	PBS
True	B	9	0	0	1	6	404	258	-40	84	[374,224,438,291]	133.4	0.9225	11	9	491	0.1899	44	0.02945	62	0.04813	6	0.004648	44	3950	6	1193						E	PBS	PBS
True	B	9	0	0	1	7	458	301	-25	68	[425,268,489,360]	137.2	0.9712	13	11	450	0.146	43	0.02798	24	0.001927	2	0.0008613	43	4335	2	566.5						F	PBS	PBS
True	B	9	0	0	1	8	892	312	105	67	[852,278,929,354]	114	0.9762	15	12	412	0.1471	38	0.02976	13	0.005355	1	0.0004337	38	4978	1	629.2						G	PBS	PBS
True	B	9	0	0	1	9	954	330	124	60	[916,299,987,388]	131.1	0.9717	17	13	471	0.1632	44	0.02997	13	0.019	1	0.0004177	44	4080	1	2640						H	PBS	PBS
True	B	9	0	0	1	10	1044	327	150	64	[998,291,1078,363]	172.4	0.9463	18	14	636	0.1365	62	0.03211	52	0.04749	4	0.001946	62	3950	4	1684						I	PBS	PBS							RNAPII-TF3C5		RNAPII-TF3C5		RNAPII-TF3C5		RNAPII-TF3C5
True	B	9	0	0	1	11	997	356	136	54	[969,310,1027,401]	159.5	1.031	19	15	600	0.1566	59	0.03302	0	0	0	0	59	4400	0	NaN						J	PBS	PBS
True	B	9	0	0	1	12	761	368	68	50	[735,334,812,404]	111	0.9902	20	16	367	0.1656	33	0.02655	52	0.07876	4	0.002142	33	4668	4	2640						K	PBS	PBS
True	B	9	0	0	1	13	907	368	110	51	[874,338,939,399]	124.9	0.9716	21	17	477	0.1626	45	0.03217	47	0.004287	4	0.002935	45	4540	4	353.5						L	PBS	PBS
True	B	9	0	0	1	14	1030	383	146	46	[997,359,1052,412]	44.55	0.9591	22	18	75	0.08405	7	0.01403	19	0.001239	2	0.001714	7	2401	2	394						M	PBS	PBS
True	B	9	0	0	1	15	424	394	-44	42	[290,357,458,427]	213.8	0.8399	24	20	588	0.1638	53	0.02213	75	0.0458	7	0.001668	53	4417	7	2980						N	PBS	PBS
True	B	9	0	0	1	16	882	402	102	38	[863,384,903,452]	102.2	0.7819	25	21	279	0.1632	24	0.02096	39	0.1226	3	0.005172	24	4534	3	3179						O	PBS	PBS
True	B	9	0	0	1	17	854	449	93	31	[820,393,886,479]	140.5	0.7673	26	22	430	0.1736	38	0.02414	34	0.002325	3	0.001776	38	4656	3	672.8						P	PBS	PBS	PBS	PBS	PBS	PBS	PBS	PBS	PBS	PBS	PBS	PBS	PBS	PBS	PBS	PBS
True	B	9	0	0	1	18	917	424	111	32	[886,398,939,467]	131.8	0.9322	27	23	458	0.1684	43	0.02913	0	0	0	0	43	4915	0	NaN
True	B	9	0	0	1	19	399	446	-41	29	[356,418,451,468]	139.6	0.8857	28	24	458	0.169	43	0.02749	0	0	0	0	43	4379	0	NaN
True	B	9	0	0	1	20	908	523	110	2	[888,497,931,567]	81.33	0.8515	29	25	164	0.1234	14	0.01537	26	0.07189	2	0.001738	14	2329	2	3251
True	B	9	0	0	1	21	871	553	99	-3	[848,517,895,587]	133.7	0.7852	30	26	417	0.1416	39	0.02603	26	0.08646	2	0.002318	39	4675	2	2138
True	B	9	0	0	1	22	990	598	136	-17	[960,567,1035,629]	116.8	0.9898	31	27	427	0.1902	39	0.02982	26	0.00585	2	0.001322	39	3087	2	397.9
True	B	9	0	0	1	23	998	640	136	-30	[954,610,1030,668]	77.67	0.9816	32	28	116	0.1277	10	0.01149	25	0.03355	2	0.001126	10	2939	2	1826
True	B	9	0	0	1	24	813	725	81	-55	[778,693,842,757]	98.64	0.9538	33	29	326	0.1964	28	0.02534	0	0	0	0	28	4570	0	NaN
True	B	9	0	0	1	25	1000	752	138	-65	[952,725,1048,784]	169.8	0.9603	34	30	562	0.1723	50	0.02629	13	0.0298	1	0.0005621	50	3793	1	3742
True	B	9	0	0	1	26	783	762	71	-65	[749,717,812,795]	125	0.9904	35	31	350	0.1252	34	0.02429	0	0	0	0	34	5721	0	NaN
True	B	9	0	0	1	27	731	759	58	-66	[708,720,758,787]	75.7	0.7824	36	32	11	0.001055	1	0.001179	0	0	0	0	1	889.1	0	NaN
True	B	9	0	0	1	28	685	768	43	-70	[657,737,716,813]	149.9	0.9459	37	33	413	0.1603	38	0.02263	0	0	0	0	38	4180	0	NaN
True	B	9	0	0	1	29	937	797	119	-77	[900,759,971,833]	146.1	0.9642	38	34	481	0.1669	44	0.02688	0	0	0	0	44	4163	0	NaN
True	B	9	0	0	1	30	743	803	62	-78	[718,777,779,831]	114.8	0.952	39	35	483	0.168	47	0.03655	0	0	0	0	47	5126	0	NaN
True	B	9	0	0	1	31	700	819	50	-84	[670,783,739,848]	117.1	0.9362	40	36	447	0.2061	37	0.0282	38	0.07964	3	0.002013	37	4506	3	3772
True	B	9	0	0	1	32	779	812	72	-82	[760,791,799,835]	63.2	0.9627	41	37	141	0.1429	11	0.01554	10	0.001815	1	0.001661	11	2847	1	838
True	B	9	0	0	1	33	898	826	110	-87	[852,780,959,870]	149.2	0.9279	43	38	540	0.154	49	0.02932	16	0.0003715	2	0.0007171	49	4863	2	587.1
True	B	9	0	0	1	34	1045	839	152	-90	[1011,799,1078,883]	167.7	0.9241	44	39	523	0.1728	49	0.02609	0	0	0	0	49	2591	0	NaN
True	B	9	0	0	1	35	1046	901	151	-107	[1009,872,1078,928]	130.2	0.9509	45	40	234	0.1669	20	0.01371	13	0.009609	1	0.0006988	20	2928	1	893.6
True	B	9	0	0	1	36	978	900	130	-107	[934,865,1009,932]	148.9	0.9046	46	41	439	0.161	42	0.02518	26	0.04029	2	0.001259	42	3630	2	1666
True	B	9	0	0	1	37	929	922	117	-115	[892,891,970,966]	116.7	0.8762	47	42	441	0.1719	39	0.02984	0	0	0	0	39	4647	0	NaN
True	B	9	0	0	1	38	768	956	67	-126	[711,922,803,1009]	124.3	0.7878	48	43	441	0.1527	41	0.02945	23	0.006635	2	0.0006066	41	5228	2	613.1
True	B	9	0	0	1	39	614	963	20	-127	[564,937,650,991]	114.3	0.9228	49	44	371	0.1675	32	0.025	0	0	0	0	32	4028	0	NaN
True	B	9	0	0	1	40	1054	953	155	-125	[1025,914,1078,1007]	110	0.9753	50	45	395	0.1705	35	0.02841	12	0.0004709	1	0.0005222	35	3630	1	288.2
True	B	9	0	0	1	41	533	985	-2	-133	[492,954,570,1016]	149.8	0.9456	51	46	442	0.1576	42	0.02503	0	0	0	0	42	4420	0	NaN
True	B	9	0	0	1	42	596	1006	21	-140	[563,984,649,1035]	135	0.9536	52	47	406	0.1398	40	0.02646	0	0	0	0	40	4846	0	NaN
True	B	9	0	0	1	43	975	1022	131	-145	[935,985,1018,1072]	162.5	0.9146	53	48	568	0.1553	55	0.03022	26	0.01453	2	0.000602	55	3684	2	1214
True	B	9	0	0	1	44	566	1038	11	-150	[540,1005,623,1067]	96.15	0.9397	55	49	361	0.1875	32	0.02971	63	0.004079	6	0.002601	32	5061	6	803
True	B	9	0	0	1	45	511	1041	-8	-150	[478,1014,542,1069]	92.04	0.9257	56	50	229	0.1308	22	0.02134	29	0.001142	3	0.001933	22	5402	3	600
True	B	9	0	0	1	46	496	342	-14	57	[451,311,525,383]	144.1	0.9814	57	51	432	0.1372	44	0.02726	26	0.03678	2	0.001272	44	5127	2	1825
True	B	9	0	0	1	47	882	489	102	15	[847,457,917,523]	163.5	0.904	58	52	526	0.1219	52	0.02838	26	0.01176	2	0.001724	52	4759	2	783.1
True	B	9	0	0	1	48	844	600	92	-20	[816,571,877,641]	136.4	0.9766	59	53	411	0.1589	37	0.02421	39	0.02399	3	0.001736	37	4253	3	1145
True	B	9	0	0	1	49	936	696	119	-45	[897,644,977,731]	154.5	1.004	60	54	484	0.1475	46	0.02657	13	0.0213	1	0.0003655	46	3386	1	2904
True	B	9	0	0	1	50	708	711	50	-51	[660,667,758,751]	132.9	0.9977	61	55	461	0.1659	43	0.02888	14	0.0001651	2	0.0005342	43	4957	2	415.6
True	B	9	0	0	1	51	876	745	102	-61	[843,704,917,780]	150.9	0.9904	62	56	476	0.1859	42	0.02485	13	0.01277	1	0.0005848	42	3743	1	1788
True	B	9	0	0	1	52	833	770	89	-70	[806,743,872,807]	166.7	0.9971	63	57	567	0.1724	51	0.02732	26	0.09874	2	0.002212	51	4247	2	3380
True	B	9	0	0	1	53	1000	810	138	-79	[965,774,1044,843]	163.2	0.9537	64	58	701	0.1753	64	0.03501	13	0.01579	1	0.0005144	64	4315	1	1499
True	B	9	0	0	1	54	997	964	138	-128	[958,928,1041,1016]	177.9	0.9636	65	59	393	0.1646	32	0.01606	0	0	0	0	32	2561	0	NaN
True	B	9	0	0	1	55	470	1015	-21	-142	[430,980,517,1055]	161.5	0.9556	66	60	511	0.1553	48	0.02653	13	0.00873	1	0.0005851	48	3964	1	831.1
True	B	9	0	0	2	1	876	28	-1193	1446	[819,1,920,65]	98.91	0.9358	1	1	179	0.1487	14	0.01264	77	0.02919	7	0.002783	14	2727	7	1335
True	B	9	0	0	2	2	924	56	-1176	1436	[890,29,967,82]	128.5	0.9967	2	2	286	0.1656	23	0.01598	38	0.02644	3	0.002473	23	3231	3	948.4
True	B	9	0	0	2	3	791	68	-1216	1432	[727,1,853,141]	84.09	0.8084	3	3	13	0.03687	1	0.001062	49	0.002054	4	0.0004077	1	3676	4	633.8
True	B	9	0	0	2	4	1016	93	-1150	1425	[983,69,1041,118]	108.8	0.8969	4	4	234	0.1648	19	0.01559	0	0	0	0	19	2826	0	NaN
True	B	9	0	0	2	5	957	106	-1166	1421	[922,81,990,131]	84	0.9061	5	5	130	0.09229	12	0.01275	25	0.01507	2	0.001544	12	3763	2	1233
True	B	9	0	0	2	6	863	108	-1192	1419	[816,64,920,155]	141.1	0.937	6	6	264	0.1235	23	0.01455	128	0.007452	12	0.003014	23	2885	12	504.8
True	B	9	0	0	2	7	1053	122	-1139	1416	[1017,93,1078,143]	82.84	0.8701	7	7	143	0.1082	13	0.01401	0	0	0	0	13	2174	0	NaN
True	B	9	0	0	2	8	710	114	-1238	1417	[669,64,768,167]	80.88	0.7665	8	8	57	0.06613	5	0.005519	0	0	0	0	5	2109	0	NaN
True	B	9	0	0	2	9	987	151	-1159	1408	[962,128,1008,177]	52.76	0.8765	9	9	98	0.1354	8	0.01354	26	0.002399	2	0.00206	8	2398	2	360
True	B	9	0	0	2	10	781	162	-1220	1404	[751,120,819,206]	117.7	0.9046	10	10	117	0.1146	9	0.006829	118	0.004437	12	0.005862	9	2887	12	359.6
True	B	9	0	0	2	11	1030	154	-1144	1407	[1003,134,1069,175]	97.84	0.9493	11	11	228	0.165	19	0.01734	35	0.003522	3	0.003659	19	3013	3	425.8
True	B	9	0	0	2	12	939	163	-1173	1403	[915,132,962,204]	85.43	0.8768	12	12	191	0.134	17	0.01776	44	0.03792	4	0.003205	17	3787	4	1780
True	B	9	0	0	2	13	709	163	-1239	1403	[684,142,754,187]	88.38	0.8006	13	13	86	0.09769	9	0.009091	0	0	0	0	9	1999	0	NaN
True	B	9	0	0	2	14	832	182	-1205	1398	[801,144,864,219]	112.6	0.9323	14	14	174	0.1244	16	0.01269	13	0.0004324	1	0.000591	16	3664	1	332.1
True	B	9	0	0	2	15	653	185	-1252	1396	[596,125,754,238]	98.56	0.9151	16	16	152	0.1389	12	0.01087	17	9.663e-05	2	0.0002536	12	4003	2	360
True	B	9	0	0	2	16	874	223	-1192	1387	[844,189,909,252]	94.36	0.9295	17	17	146	0.1252	12	0.01135	52	0.002885	5	0.003143	12	3112	5	486.1
True	B	9	0	0	2	17	808	228	-1211	1385	[782,197,839,257]	82.22	0.9568	18	18	205	0.1398	18	0.01954	48	0.001958	5	0.003392	18	4986	5	408.5
True	B	9	0	0	2	18	715	249	-1239	1377	[683,222,746,288]	104.9	0.9211	19	19	184	0.1323	17	0.01447	25	0.001399	2	0.001441	17	4161	2	435.1
True	B	9	0	0	2	19	670	263	-1253	1374	[639,228,702,295]	92.48	0.9283	20	20	179	0.1539	15	0.01448	36	0.001732	4	0.002374	15	3866	4	483.4
True	B	9	0	0	2	20	884	270	-1185	1373	[857,237,933,296]	124.9	0.9807	21	21	329	0.1465	29	0.02073	63	0.003079	5	0.003003	29	4820	5	350.7
True	B	9	0	0	2	21	593	259	-1274	1374	[537,198,651,338]	73.29	0.9264	23	22	23	0.02277	2	0.002436	65	0.001434	6	0.0007383	2	1630	6	690.3
True	B	9	0	0	2	22	759	254	-1226	1376	[733,224,785,288]	58.2	0.8073	24	23	16	0.002426	2	0.003067	10	0.0002831	1	0.000641	2	841.6	1	473.2
True	B	9	0	0	2	23	743	301	-1229	1363	[723,278,774,323]	83.02	0.9198	25	24	196	0.1613	16	0.0172	13	0.03612	1	0.001222	16	4336	1	3523
True	B	9	0	0	2	24	913	311	-1181	1359	[876,286,945,348]	94.54	1.003	26	25	220	0.1241	20	0.01889	50	0.001848	5	0.003049	20	3755	5	351
True	B	9	0	0	2	25	657	311	-1256	1360	[630,285,688,337]	80.61	0.968	27	26	209	0.127	19	0.02104	22	0.00128	2	0.001726	19	4069	2	367.5
True	B	9	0	0	2	26	811	317	-1211	1358	[785,293,838,351]	92.4	0.9684	28	27	208	0.1359	18	0.01739	44	0.05633	4	0.004086	18	3704	4	1766
True	B	9	0	0	2	27	859	328	-1195	1355	[835,301,887,359]	91.32	0.9619	29	28	205	0.1936	17	0.01662	22	0.001802	2	0.001597	17	4309	2	352.5
True	B	9	0	0	2	28	539	315	-1296	1352	[466,259,594,408]	69.72	0.8293	30	29	13	0.03725	1	0.00128	26	0.003621	2	0.0002478	1	2998	2	1252
True	B	9	0	0	2	29	572	357	-1282	1345	[537,325,612,403]	79.9	0.9518	32	30	202	0.1739	17	0.01899	50	0.001262	5	0.001901	17	4590	5	436.9
True	B	9	0	0	2	30	644	351	-1259	1347	[626,332,673,372]	66.51	0.93	33	31	146	0.09989	13	0.01745	26	0.101	2	0.00313	13	4792	2	4288
True	B	9	0	0	2	31	828	352	-1205	1346	[800,330,862,378]	52.13	0.7365	34	32	0	0	0	0	0	0	0	0	0	NaN	0	NaN
True	B	9	0	0	2	32	771	369	-1222	1342	[746,342,801,405]	88.29	0.975	35	33	206	0.1452	18	0.0182	41	0.003154	4	0.00316	18	4971	4	504.2
True	B	9	0	0	2	33	702	368	-1242	1343	[672,343,734,393]	72.93	0.9817	36	34	166	0.1222	16	0.01958	32	0.001765	3	0.002451	16	4793	3	339.5
True	B	9	0	0	2	34	1050	372	-1139	1341	[1022,342,1078,406]	137.7	0.8436	37	35	434	0.143	41	0.02659	25	0.002385	2	0.001505	41	4309	2	635.6
True	B	9	0	0	2	35	936	360	-1174	1344	[894,326,968,405]	112.5	0.988	38	36	329	0.1367	29	0.02302	13	0.001664	1	0.0004203	29	4690	1	548.4
True	B	9	0	0	2	36	885	378	-1188	1340	[863,342,907,405]	82.58	1.005	39	37	258	0.1564	23	0.02486	0	0	0	0	23	4324	0	NaN
True	B	9	0	0	2	37	816	396	-1206	1334	[788,366,865,427]	132	0.9759	40	38	283	0.1376	25	0.0169	71	0.003263	6	0.003326	25	5307	6	392.9
True	B	9	0	0	2	38	966	416	-1165	1329	[936,386,996,451]	88.74	0.9563	41	39	261	0.1557	22	0.02213	13	0.03649	1	0.0006017	22	4882	1	3707
True	B	9	0	0	2	39	595	426	-1274	1325	[568,395,629,461]	79.9	0.9197	44	41	179	0.1525	15	0.01676	32	0.001916	3	0.001881	15	4381	3	404.2
True	B	9	0	0	2	40	480	447	-1311	1324	[435,363,518,488]	114.1	0.9134	45	42	210	0.1389	18	0.01408	33	0.001263	4	0.0009697	18	4069	4	1038
True	B	9	0	0	2	41	544	459	-1290	1316	[518,432,572,487]	93.2	0.9228	46	43	243	0.1579	21	0.02011	13	0.04268	1	0.0009542	21	4585	1	3456
True	B	9	0	0	2	42	739	476	-1230	1311	[697,438,797,516]	108.1	0.9561	47	44	322	0.1231	31	0.0256	49	0.0008285	5	0.001162	31	6604	5	507.2
True	B	9	0	0	2	43	939	470	-1172	1312	[908,438,971,504]	125.8	0.9756	48	45	353	0.1497	33	0.02342	32	0.003632	3	0.002008	33	4465	3	577.7
True	B	9	0	0	2	44	1015	470	-1148	1312	[987,447,1055,497]	84.18	0.9591	49	46	200	0.1515	18	0.01909	11	0	2	0.0018	18	4402	2	353.9
True	B	9	0	0	2	45	499	493	-1304	1304	[457,458,533,539]	87.13	0.851	50	47	218	0.1487	19	0.01947	59	0.002365	5	0.001987	19	3997	5	442
True	B	9	0	0	2	46	543	511	-1291	1300	[512,484,575,540]	84.45	0.9608	52	49	241	0.1688	21	0.0222	41	0.002162	4	0.002608	21	4810	4	388.7
True	B	9	0	0	2	47	432	526	-1325	1296	[375,478,473,594]	66.06	0.8309	54	50	87	0.06454	8	0.01081	12	0.000125	1	0.0002236	8	1551	1	452.8
True	B	9	0	0	2	48	1038	511	-1142	1300	[1020,493,1065,531]	56.6	0.9393	55	51	44	0.06144	4	0.006309	0	0	0	0	4	2156	0	NaN
True	B	9	0	0	2	49	605	521	-1272	1297	[571,489,636,549]	82.49	0.9371	56	52	255	0.1262	25	0.02706	37	0.00131	4	0.002784	25	5155	4	323.8
True	B	9	0	0	2	50	752	535	-1227	1293	[723,506,785,561]	84.27	0.9279	57	53	230	0.1447	21	0.02225	82	0.006739	7	0.005275	21	5639	7	416.6
True	B	9	0	0	2	51	984	550	-1157	1288	[956,526,1020,578]	72.49	0.9095	58	54	194	0.161	17	0.02094	11	0.0003183	1	0.0006165	17	4650	1	321.5
True	B	9	0	0	2	52	372	547	-1343	1288	[320,493,411,610]	59.99	0.9461	59	55	38	0.06864	3	0.004464	0	0	0	0	3	3000	0	NaN
True	B	9	0	0	2	53	474	569	-1312	1283	[430,527,506,608]	103.4	0.8957	60	56	197	0.1159	17	0.01468	81	0.05455	7	0.002401	17	4726	7	1962
True	B	9	0	0	2	54	633	571	-1263	1282	[597,541,665,598]	111.5	0.8847	61	57	295	0.1735	26	0.02082	116	0.04876	11	0.006765	26	5675	11	842.5
True	B	9	0	0	2	55	901	593	-1184	1276	[868,560,934,628]	73.47	0.9389	63	58	139	0.114	12	0.01458	0	0	0	0	12	4402	0	NaN
True	B	9	0	0	2	56	847	598	-1201	1274	[814,575,874,627]	98.73	0.9745	64	59	321	0.1499	30	0.02712	0	0	0	0	30	4606	0	NaN
True	B	9	0	0	2	57	400	597	-1334	1274	[362,567,434,635]	79.54	0.9494	65	60	38	0.04879	3	0.003367	62	0.009951	6	0.003066	3	2162	6	1063
True	B	9	0	0	2	58	577	607	-1281	1271	[552,587,598,628]	64.54	0.9876	66	61	185	0.1756	16	0.02213	13	0.05593	1	0.001414	16	4531	1	3496
True	B	9	0	0	2	59	951	614	-1167	1270	[923,587,986,642]	152.2	0.9704	67	62	485	0.1703	43	0.02522	13	0.03102	1	0.0009756	43	4681	1	2582
True	B	9	0	0	2	60	1013	615	-1151	1267	[981,590,1042,657]	106.9	0.9787	68	63	298	0.1569	27	0.02256	26	0.04559	2	0.00153	27	5037	2	2087
True	B	9	0	0	2	61	795	623	-1216	1267	[766,590,825,656]	98.47	0.9528	69	64	232	0.1373	20	0.01813	30	0.02066	4	0.002418	20	5011	4	1243
True	B	9	0	0	2	62	649	623	-1259	1266	[620,597,679,651]	70.26	0.9605	70	65	217	0.1556	20	0.02541	55	0.04416	5	0.003602	20	4783	5	1577
True	B	9	0	0	2	63	719	621	-1238	1265	[692,592,748,675]	86.68	0.9229	71	66	225	0.1482	19	0.01957	58	0.05059	5	0.002426	19	6302	5	2678
True	B	9	0	0	2	64	361	643	-1346	1258	[330,610,389,701]	84.99	0.9223	72	67	173	0.1601	15	0.01576	20	0.001172	2	0.001088	15	3935	2	439.7
True	B	9	0	0	2	65	463	637	-1315	1263	[434,604,490,670]	89.99	0.9641	73	68	188	0.1576	16	0.01587	32	0.001366	3	0.00177	16	4590	3	439.9
True	B	9	0	0	2	66	413	641	-1328	1261	[389,612,443,669]	84.9	0.9217	74	69	143	0.1759	12	0.01262	137	0.008595	14	0.01335	12	4350	14	555.9
True	B	9	0	0	2	67	851	646	-1197	1260	[820,609,884,679]	102.6	0.9461	75	70	301	0.1551	25	0.02176	48	0.02791	4	0.002277	25	4807	4	1187
True	B	9	0	0	2	68	906	665	-1181	1254	[878,630,941,694]	96.68	0.8958	77	71	330	0.1339	32	0.02955	0	0	0	0	32	6039	0	NaN
True	B	9	0	0	2	69	764	668	-1224	1253	[732,630,796,703]	109.9	0.9748	78	72	277	0.164	24	0.0195	26	0.03174	2	0.001183	24	3582	2	1953
True	B	9	0	0	2	70	389	673	-1337	1251	[368,649,410,702]	79.99	0.89	79	73	149	0.1674	13	0.01451	43	0.002792	5	0.007042	13	4491	5	590.4
True	B	9	0	0	2	71	598	709	-1275	1241	[569,685,627,733]	82.75	0.9829	80	74	231	0.1336	22	0.02373	83	0.02849	7	0.007361	22	5484	7	554.6
True	B	9	0	0	2	72	447	724	-1320	1236	[403,693,481,754]	111.7	0.9106	81	75	194	0.1442	17	0.01359	95	0.003179	9	0.004757	17	4373	9	428.9
True	B	9	0	0	2	73	650	724	-1259	1236	[623,695,678,756]	87.75	0.9002	82	76	248	0.1608	22	0.02238	0	0	0	0	22	3717	0	NaN
True	B	9	0	0	2	74	960	730	-1166	1234	[930,702,992,770]	92.22	0.9466	83	77	387	0.1568	36	0.03485	26	0.009749	2	0.001218	36	5160	2	860
True	B	9	0	0	2	75	806	748	-1211	1230	[773,717,844,776]	139.2	0.9216	84	78	355	0.1631	32	0.02053	38	0.005099	3	0.00232	32	4547	3	514.3
True	B	9	0	0	2	76	569	759	-1282	1226	[546,733,598,787]	67.13	0.9122	85	79	114	0.1475	10	0.0133	91	0.1156	7	0.006579	10	3354	7	1986
True	B	9	0	0	2	77	857	756	-1198	1226	[819,722,881,790]	111.2	0.972	86	80	286	0.1815	24	0.01926	13	0.01511	1	0.0007949	24	3789	1	1684
True	B	9	0	0	2	78	918	763	-1179	1224	[881,740,942,791]	94.45	0.9599	87	81	382	0.1501	37	0.03497	13	0.02407	1	0.001025	37	5093	1	1980
True	B	9	0	0	2	79	497	776	-1304	1221	[468,747,531,805]	88.74	0.9256	88	82	238	0.1642	21	0.02113	52	0.002935	5	0.003504	21	4639	5	384.2
True	B	9	0	0	2	80	399	775	-1333	1222	[367,747,435,803]	123.4	0.8893	89	83	196	0.1318	16	0.01158	49	0.0383	4	0.003509	16	2969	4	1273
True	B	9	0	0	2	81	755	783	-1228	1219	[719,751,782,816]	107.2	0.9907	90	84	345	0.1307	30	0.02498	13	0.002118	1	0.00062	30	4819	1	372
True	B	9	0	0	2	82	306	785	-1360	1219	[274,744,360,824]	123.9	0.9855	91	85	84	0.06234	7	0.005043	89	0.004541	9	0.00306	7	2211	9	762.1
True	B	9	0	0	2	83	978	792	-1160	1215	[945,750,1008,846]	134.8	0.9363	92	86	519	0.1377	49	0.03245	13	0.002546	1	0.0004651	49	4718	1	533.3
True	B	9	0	0	2	84	606	788	-1272	1217	[577,764,635,820]	45.89	0.946	94	87	93	0.1554	8	0.01556	77	0.007926	7	0.004775	8	4429	7	644.3
True	B	9	0	0	2	85	855	807	-1197	1211	[826,782,881,839]	124.7	0.919	95	88	359	0.1561	31	0.02219	0	0	0	0	31	4548	0	NaN
True	B	9	0	0	2	86	360	813	-1345	1209	[314,782,402,845]	94	0.8723	96	89	196	0.1487	17	0.01614	31	0.005699	3	0.001237	17	4337	3	530.7
True	B	9	0	0	2	87	430	824	-1323	1207	[396,795,472,853]	103.5	0.8791	97	90	148	0.1118	12	0.01035	38	0.005352	3	0.001692	12	2518	3	563.2
True	B	9	0	0	2	88	633	824	-1264	1205	[602,795,666,863]	95.16	0.9539	98	91	196	0.1481	17	0.01595	13	0.00103	1	0.000485	17	4960	1	478.6
True	B	9	0	0	2	89	810	839	-1211	1204	[771,795,852,871]	132.3	0.8512	99	92	351	0.1608	30	0.02024	10	0.000164	1	0.0004268	30	4150	1	359.6
True	B	9	0	0	2	90	885	847	-1189	1200	[844,819,917,876]	97.31	0.9767	100	93	329	0.1454	30	0.02752	13	0.00574	1	0.0006242	30	5371	1	744.6
True	B	9	0	0	2	91	278	857	-1369	1196	[225,816,321,899]	120.3	0.9599	101	94	299	0.1346	26	0.01929	102	0.003983	9	0.002373	26	3622	9	522.9
True	B	9	0	0	2	92	949	849	-1170	1199	[919,816,978,882]	84	0.9471	102	95	140	0.1933	11	0.01169	0	0	0	0	11	4046	0	NaN
True	B	9	0	0	2	93	335	856	-1354	1196	[310,824,359,894]	83.11	0.8907	103	96	161	0.1153	14	0.01504	24	0.001425	2	0.001778	14	2940	2	391.2
True	B	9	0	0	2	94	698	863	-1244	1195	[673,838,728,892]	79.27	0.9699	104	97	192	0.1338	18	0.02027	0	0	0	0	18	4733	0	NaN
True	B	9	0	0	2	95	411	886	-1331	1189	[377,835,442,927]	134.1	0.9499	105	98	257	0.1613	22	0.01465	124	0.01068	12	0.004787	22	4580	12	874.3
True	B	9	0	0	2	96	653	876	-1258	1190	[619,850,683,909]	77.13	0.8808	106	99	31	0.0169	3	0.003472	65	0.08483	5	0.002703	3	653	5	2521
True	B	9	0	0	2	97	361	895	-1344	1187	[336,841,390,928]	109.4	0.8911	107	100	230	0.1401	20	0.01633	116	0.02176	10	0.006064	20	4234	10	652
True	B	9	0	0	2	98	855	886	-1198	1187	[829,853,881,928]	98.38	0.905	108	101	207	0.1202	18	0.01633	26	0.02339	2	0.001283	18	5290	2	1172
True	B	9	0	0	2	99	775	900	-1221	1183	[739,864,809,948]	73.47	0.8753	109	102	201	0.1431	18	0.02187	11	0.0005918	1	0.0003068	18	4359	1	1208
True	B	9	0	0	2	100	895	901	-1185	1185	[874,870,915,928]	54.72	0.9208	110	103	76	0.1065	7	0.01142	39	0.08072	3	0.003165	7	2305	3	2028
True	B	9	0	0	2	101	590	874	-1275	1190	[561,817,625,937]	104.6	0.9475	111	104	317	0.1667	26	0.02218	102	0.02377	9	0.002182	26	4938	9	1082
True	B	9	0	0	2	102	468	914	-1312	1177	[439,884,504,967]	92.93	0.9408	112	105	273	0.1369	25	0.02402	35	0.0116	3	0.001283	25	5223	3	1102
True	B	9	0	0	2	103	522	911	-1296	1181	[492,878,552,943]	112.9	0.9709	113	106	306	0.1514	28	0.02213	58	0.03978	5	0.003566	28	4248	5	952.3
True	B	9	0	0	2	104	334	933	-1353	1176	[304,891,363,965]	83.02	0.8901	114	107	153	0.1632	12	0.0129	12	0.000324	1	0.0005485	12	4989	1	368.1
True	B	9	0	0	2	105	648	925	-1260	1176	[613,902,673,952]	107.2	0.9707	115	108	320	0.146	29	0.02415	0	0	0	0	29	4299	0	NaN
True	B	9	0	0	2	106	249	909	-1379	1179	[221,878,275,957]	47.67	0.872	116	109	80	0.0982	7	0.01311	13	0.0005837	1	0.0003863	7	1992	1	424.6
True	B	9	0	0	2	107	731	938	-1235	1172	[693,898,758,973]	93.11	0.9623	117	110	328	0.1665	30	0.02876	76	0.03579	6	0.00272	30	4706	6	1503
True	B	9	0	0	2	108	867	938	-1192	1173	[842,912,901,967]	52.13	0.8945	118	111	0	0	0	0	40	0.002056	4	0.002967	0	NaN	4	523.9
True	B	9	0	0	2	109	562	944	-1285	1170	[540,914,586,974]	73.47	0.9389	119	112	228	0.1667	20	0.0243	74	0.01079	7	0.006346	20	4754	7	591.9
True	B	9	0	0	2	110	825	956	-1207	1168	[786,927,857,984]	72.31	0.8872	120	113	68	0.064	6	0.007407	25	0.008059	2	0.00103	6	1915	2	983.6
True	B	9	0	0	2	111	517	963	-1297	1165	[492,938,544,990]	47.85	0.8377	121	114	39	0.1009	3	0.005597	43	0.001712	5	0.003943	3	2665	5	400.8
True	B	9	0	0	2	112	662	968	-1254	1165	[627,938,699,993]	93.82	0.889	122	115	185	0.1101	17	0.01618	9	0.0003069	1	0.0006502	17	4350	1	491.4
True	B	9	0	0	2	113	445	969	-1319	1163	[411,937,481,1003]	117.8	0.9483	123	116	302	0.1606	26	0.0197	20	0.001731	2	0.001276	26	3342	2	569
True	B	9	0	0	2	114	252	977	-1373	1165	[220,895,311,1029]	82.84	0.8431	124	117	115	0.04419	10	0.01078	39	0.0005106	4	0.0007381	10	1699	4	465.6
True	B	9	0	0	2	115	310	994	-1360	1158	[280,945,342,1023]	130.3	0.9865	125	118	249	0.171	20	0.0137	127	0.0151	11	0.006691	20	3850	11	617.7
True	B	9	0	0	2	116	628	995	-1267	1157	[592,951,652,1029]	99	0.9363	126	119	340	0.1511	32	0.02885	0	0	0	0	32	4250	0	NaN
True	B	9	0	0	2	117	398	994	-1334	1154	[370,958,428,1032]	101	0.9471	128	120	320	0.132	31	0.02741	71	0.002954	6	0.003214	31	5190	6	332.5
True	B	9	0	0	2	118	569	1010	-1282	1152	[555,990,587,1026]	65.17	0.745	129	121	65	0.08841	5	0.006849	0	NaN	0	NaN	5	1500	0	NaN
True	B	9	0	0	2	119	509	1007	-1300	1151	[482,980,536,1037]	94	0.9372	130	122	314	0.1324	28	0.02659	24	0.00165	2	0.001614	28	5181	2	413.3
True	B	9	0	0	2	120	667	1013	-1251	1152	[644,973,703,1038]	57.04	0.906	131	123	124	0.1432	11	0.01721	0	0	0	0	11	3946	0	NaN
True	B	9	0	0	2	121	714	1051	-1239	1146	[681,968,755,1078]	97.13	0.9259	132	124	340	0.2007	29	0.02665	47	0.02121	4	0.001006	29	3829	4	2185
True	B	9	0	0	2	122	752	1016	-1226	1142	[731,993,793,1078]	49.37	0.9729	133	125	88	0.1311	7	0.01266	58	0.02675	6	0.002174	7	3963	6	1282
True	B	9	0	0	2	123	798	1026	-1215	1146	[771,1001,823,1054]	62.67	0.9453	134	126	110	0.1271	9	0.01282	64	0.02011	6	0.00458	9	2219	6	822.9
True	B	9	0	0	2	124	252	1047	-1378	1139	[217,1010,294,1078]	53.56	0.9218	135	127	110	0.1384	9	0.015	33	0.001956	3	0.0009431	9	2249	3	656.7
True	B	9	0	0	2	125	1014	36	-1151	1441	[953,1,1060,85]	167.7	0.9534	138	128	415	0.1286	37	0.0197	98	0.02023	8	0.0024	37	2641	8	958.3
True	B	9	0	0	2	126	1000	199	-1154	1393	[965,169,1037,232]	152.3	0.9547	139	129	420	0.1531	37	0.02169	55	0.002228	5	0.002987	37	4121	5	355.6
True	B	9	0	0	2	127	890	441	-1187	1321	[854,406,925,476]	145.8	0.9795	140	130	262	0.1317	21	0.01286	39	0.02481	3	0.001742	21	3582	3	1365
True	B	9	0	0	2	128	823	503	-1208	1303	[781,468,858,538]	128.6	0.9791	141	131	444	0.1528	39	0.02706	47	0.03531	4	0.001832	39	5420	4	1259
True	B	9	0	0	2	129	1049	554	-1139	1287	[1017,524,1078,586]	151.9	0.961	142	132	506	0.1496	46	0.02704	13	0.03881	1	0.001075	46	5300	1	2632
True	B	9	0	0	3	1	439	27	-999	1445	[398,1,478,53]	130.3	0.9686	6	5	364	0.1325	31	0.02123	62	0.0288	5	0.002962	31	3944	5	1300
True	B	9	0	0	3	2	240	29	-1058	1445	[201,1,281,58]	112.5	0.8892	7	6	329	0.14	28	0.02222	36	0.005863	3	0.001308	28	3897	3	601
True	B	9	0	0	3	3	788	34	-895	1441	[776,22,801,60]	64.72	0.8605	8	7	39	0.01695	3	0.004138	0	NaN	0	NaN	3	797.8	0	NaN
True	B	9	0	0	3	4	684	37	-926	1442	[653,1,713,68]	60.44	0.8899	9	8	73	0.06054	6	0.008863	0	0	0	0	6	3445	0	NaN
True	B	9	0	0	3	5	911	33	-861	1443	[836,1,953,81]	111.9	0.8946	10	9	312	0.1548	26	0.02075	187	0.06721	17	0.004126	26	3120	17	3368
True	B	9	0	0	3	6	583	57	-956	1435	[548,32,609,89]	53.03	0.7818	11	10	13	0.03618	1	0.001684	167	0.1078	14	0.008144	1	2867	14	1967
True	B	9	0	0	3	7	825	71	-883	1430	[797,40,849,111]	90.34	0.9664	12	11	223	0.1614	19	0.01877	13	0.002641	1	0.0006964	19	3875	1	391.8
True	B	9	0	0	3	8	446	76	-997	1430	[417,50,472,104]	88.65	0.8961	14	13	269	0.1454	23	0.02316	13	0.0007153	1	0.0007837	23	3989	1	333.9
True	B	9	0	0	3	9	230	82	-1062	1427	[186,53,263,120]	147.2	0.9765	15	14	405	0.1481	35	0.02123	89	0.03741	7	0.004009	35	4117	7	1170
True	B	9	0	0	3	10	74	76	-1107	1430	[51,53,103,100]	69.19	0.9286	16	15	112	0.1136	9	0.01161	48	0.005787	5	0.004394	9	3220	5	552.7
True	B	9	0	0	3	11	672	94	-929	1425	[637,63,701,129]	81.77	0.9323	17	16	120	0.133	10	0.01092	13	0.01221	1	0.0005794	10	3841	1	1196
True	B	9	0	0	3	12	769	99	-899	1423	[738,72,811,131]	118.8	0.9352	18	17	292	0.154	25	0.01878	12	0.0007932	1	0.0007262	25	3824	1	341.1
True	B	9	0	0	3	13	1019	97	-826	1424	[993,70,1041,123]	89.18	0.9384	19	18	192	0.1291	17	0.01702	22	0.06093	2	0.002717	17	3592	2	1795
True	B	9	0	0	3	14	548	107	-967	1421	[522,81,573,134]	83.56	0.9549	20	19	250	0.1286	22	0.0235	0	0	0	0	22	5071	0	NaN
True	B	9	0	0	3	15	159	102	-1082	1420	[129,61,194,154]	129	0.9717	21	20	331	0.1029	32	0.02215	55	0.002942	5	0.001991	32	4631	5	487.3
True	B	9	0	0	3	16	417	123	-1006	1416	[392,92,441,162]	82.93	0.8525	22	21	258	0.1484	23	0.02476	52	0.00293	5	0.003814	23	4345	5	342.3
True	B	9	0	0	3	17	596	115	-954	1420	[548,77,623,144]	93.29	0.9233	23	22	158	0.1045	15	0.01435	37	0.05957	3	0.00177	15	2733	3	2684
True	B	9	0	0	3	18	709	123	-918	1416	[685,93,734,150]	87.93	0.9619	24	23	247	0.1273	23	0.02335	78	0.04384	7	0.007684	23	4458	7	835
True	B	9	0	0	3	19	813	128	-887	1414	[774,105,852,155]	90.61	0.937	25	24	155	0.136	14	0.01379	0	0	0	0	14	3799	0	NaN
True	B	9	0	0	3	20	645	132	-937	1413	[614,100,680,165]	101.5	0.95	26	25	208	0.1395	18	0.01583	0	0	0	0	18	4352	0	NaN
True	B	9	0	0	3	21	524	146	-973	1409	[497,113,552,174]	103.9	0.9251	27	26	186	0.1291	16	0.01375	23	0.02904	2	0.001795	16	3978	2	1626
True	B	9	0	0	3	22	913	141	-857	1412	[878,105,941,171]	101.7	0.9226	28	27	228	0.1751	19	0.01668	25	0.003161	2	0.001229	19	3051	2	421.1
True	B	9	0	0	3	23	447	158	-996	1406	[407,125,489,192]	155.9	0.8929	29	28	428	0.1456	38	0.02176	0	0	0	0	38	4816	0	NaN
True	B	9	0	0	3	24	295	157	-1043	1404	[261,133,320,186]	91.24	0.9019	30	29	142	0.1044	11	0.01076	26	0.007631	2	0.001563	11	2940	2	1094
True	B	9	0	0	3	25	974	152	-841	1408	[930,113,1005,184]	104.8	0.9029	31	30	319	0.1683	27	0.023	13	0.008398	1	0.0005322	27	3651	1	900.6
True	B	9	0	0	3	26	571	159	-959	1405	[547,131,597,196]	47.14	0.8786	32	31	90	0.133	7	0.01326	51	0.03329	4	0.002336	7	4529	4	1431
True	B	9	0	0	3	27	494	178	-983	1398	[459,149,528,211]	124.4	0.997	33	32	302	0.1505	25	0.01795	0	0	0	0	25	4064	0	NaN
True	B	9	0	0	3	28	678	182	-927	1398	[643,147,715,220]	160.2	0.9213	34	33	355	0.1459	31	0.01728	0	0	0	0	31	4884	0	NaN
True	B	9	0	0	3	29	737	178	-910	1400	[708,155,769,207]	90.16	0.9547	35	34	207	0.1471	17	0.01683	42	0.03861	4	0.003591	17	3827	4	1764
True	B	9	0	0	3	30	817	179	-889	1400	[760,150,847,214]	106.9	0.8874	36	35	221	0.1353	18	0.01504	30	0.004816	3	0.001209	18	3513	3	2021
True	B	9	0	0	3	31	127	198	-1091	1394	[101,162,171,230]	105.4	0.933	37	36	272	0.1334	25	0.02117	58	0.00997	6	0.003881	25	3658	6	438.2
True	B	9	0	0	3	32	215	200	-1066	1393	[177,169,248,228]	126.1	0.9419	38	37	313	0.149	27	0.01911	55	0.05371	5	0.003726	27	3461	5	1426
True	B	9	0	0	3	33	546	199	-967	1393	[516,172,577,229]	124.5	0.9435	39	38	358	0.1558	32	0.02294	0	0	0	0	32	4970	0	NaN
True	B	9	0	0	3	34	366	194	-1020	1394	[333,170,397,222]	67.58	0.9507	40	39	132	0.1088	11	0.01453	34	0.001705	4	0.003065	11	3455	4	396
True	B	9	0	0	3	35	32	209	-1121	1390	[6,183,58,234]	111.8	0.8699	41	40	318	0.1239	28	0.02236	26	0.08443	2	0.002448	28	4121	2	3206
True	B	9	0	0	3	36	278	209	-1046	1391	[251,180,319,235]	120.1	0.9409	42	41	307	0.103	30	0.0223	25	0.03687	2	0.001668	30	4723	2	1822
True	B	9	0	0	3	37	421	214	-1005	1388	[389,185,448,249]	75.61	0.9109	43	42	184	0.1467	16	0.01889	10	0.0001065	1	0.0005464	16	3288	1	369.1
True	B	9	0	0	3	38	800	227	-892	1385	[774,196,824,259]	103.8	0.9528	44	43	191	0.1359	16	0.01376	13	0.0007826	1	0.0008475	16	4210	1	345.7
True	B	9	0	0	3	39	331	221	-1031	1386	[300,182,370,254]	141.3	0.9622	45	44	350	0.1189	32	0.02021	13	0.004462	1	0.0006575	32	4984	1	1115
True	B	9	0	0	3	40	752	221	-904	1387	[724,184,779,252]	93.47	0.9147	46	45	124	0.1202	11	0.01051	47	0.003792	4	0.003082	11	2917	4	478
True	B	9	0	0	3	41	564	242	-960	1380	[535,213,605,270]	107.5	0.9343	47	46	315	0.1532	28	0.02326	26	0.03234	2	0.001459	28	5188	2	1679
True	B	9	0	0	3	42	717	248	-916	1378	[692,222,743,277]	97.13	0.9165	48	47	380	0.1287	37	0.03401	22	0.009926	2	0.002198	37	5302	2	584.6
True	B	9	0	0	3	43	168	245	-1079	1379	[137,196,200,288]	116.7	0.9429	49	48	327	0.1277	29	0.02219	112	0.006531	11	0.004689	29	4352	11	416.2
True	B	9	0	0	3	44	220	251	-1064	1377	[194,223,250,289]	92.84	0.9504	50	49	215	0.1195	19	0.01827	26	0.002631	2	0.001319	19	4258	2	372.8
True	B	9	0	0	3	45	676	257	-928	1376	[655,235,699,282]	58.2	0.955	52	50	107	0.0887	10	0.01534	13	0.01693	1	0.001209	10	2727	1	1029
True	B	9	0	0	3	46	353	291	-1025	1367	[317,249,382,319]	142	0.9325	54	51	434	0.124	40	0.02514	24	0.01592	2	0.00135	40	4949	2	1326
True	B	9	0	0	3	47	292	294	-1043	1364	[262,265,321,330]	76.77	0.8883	55	52	213	0.1588	18	0.02093	23	0.02831	2	0.001179	18	4442	2	1906
True	B	9	0	0	3	48	98	290	-1100	1366	[70,262,132,321]	110.3	0.987	56	53	244	0.1376	20	0.01618	59	0.05196	5	0.003499	20	4154	5	1481
True	B	9	0	0	3	49	461	307	-993	1361	[427,277,492,338]	94.9	0.9229	57	54	285	0.1671	25	0.02352	0	0	0	0	25	4405	0	NaN
True	B	9	0	0	3	50	46	318	-1116	1357	[18,290,76,352]	88.29	0.9329	58	55	228	0.1042	20	0.02022	0	0	0	0	20	5454	0	NaN
True	B	9	0	0	3	51	809	325	-889	1356	[778,295,839,353]	89.54	0.9509	59	56	316	0.1139	31	0.03091	39	0.08446	3	0.002063	31	5508	3	3326
True	B	9	0	0	3	52	520	322	-974	1356	[494,297,550,351]	53.83	0.8993	60	57	19	0.004361	2	0.003317	13	0.01943	1	0.0007246	2	924.9	1	2134
True	B	9	0	0	3	53	407	335	-1008	1351	[375,304,440,377]	135.2	0.9632	62	59	417	0.1233	39	0.02574	23	0.002431	2	0.001141	39	5688	2	379.9
True	B	9	0	0	3	54	574	334	-958	1353	[542,304,609,365]	87.93	0.8825	63	60	175	0.1308	17	0.01726	0	0	0	0	17	5276	0	NaN
True	B	9	0	0	3	55	302	350	-1039	1348	[274,319,337,387]	127.3	0.9643	64	61	355	0.1752	30	0.02104	13	0.006808	1	0.0007435	30	4004	1	632.5
True	B	9	0	0	3	56	358	359	-1024	1344	[322,333,390,392]	70.7	0.9405	65	62	117	0.1574	9	0.01136	12	0.001043	1	0.0005516	9	4547	1	826.4
True	B	9	0	0	3	57	527	368	-977	1346	[467,324,559,390]	72.85	0.9342	66	63	159	0.1927	13	0.01593	21	0.009062	2	0.0008893	13	4041	2	1080
True	B	9	0	0	3	58	469	378	-989	1340	[446,347,504,402]	78.11	0.8776	67	64	231	0.153	20	0.02286	9	0.0004649	1	0.0008389	20	5477	1	440.2
True	B	9	0	0	3	59	794	379	-892	1340	[765,352,828,406]	92.66	0.9101	68	65	128	0.12	10	0.009634	0	0	0	0	10	4906	0	NaN
True	B	9	0	0	3	60	391	392	-1012	1334	[363,362,428,429]	115.3	0.9732	69	66	282	0.1265	25	0.01935	21	0.02032	2	0.001265	25	5245	2	1633
True	B	9	0	0	3	61	155	432	-1084	1321	[132,404,177,484]	93.11	0.9419	70	67	169	0.1611	14	0.01342	13	0.01865	1	0.0006878	14	4208	1	2299
True	B	9	0	0	3	62	366	442	-1021	1320	[339,409,395,476]	114.4	0.9499	71	68	410	0.134	38	0.02966	13	0.006086	1	0.0006734	38	4583	1	757
True	B	9	0	0	3	63	507	456	-979	1317	[475,427,537,484]	86.95	0.9246	72	69	237	0.1509	19	0.01951	0	0	0	0	19	4939	0	NaN
True	B	9	0	0	3	64	284	453	-1046	1318	[229,421,341,483]	148.7	0.8967	73	70	507	0.1419	47	0.02821	0	0	0	0	47	4556	0	NaN
True	B	9	0	0	3	65	55	471	-1114	1310	[23,447,82,510]	83.56	0.9442	74	71	210	0.1254	18	0.01923	0	0	0	0	18	3565	0	NaN
True	B	9	0	0	3	66	460	476	-992	1309	[428,439,498,509]	101.2	0.9389	75	72	246	0.1394	22	0.0194	13	0.01234	1	0.0005804	22	3956	1	1219
True	B	9	0	0	3	67	101	489	-1100	1305	[76,461,128,522]	115.3	0.9278	76	73	332	0.1389	30	0.02322	35	0.04214	4	0.00354	30	4573	4	1142
True	B	9	0	0	3	68	344	493	-1027	1305	[310,464,376,521]	104.2	0.9744	77	74	389	0.1449	36	0.03085	13	0.02703	1	0.0007231	36	4340	1	2519
True	B	9	0	0	3	69	208	515	-1069	1299	[165,489,239,539]	102.5	0.9362	79	75	316	0.1485	29	0.02526	11	0.0008697	1	0.0009166	29	4779	1	368.3
True	B	9	0	0	3	70	194	561	-1072	1286	[149,525,242,591]	132.1	0.9255	80	76	397	0.1377	39	0.02635	48	0.01332	4	0.002036	39	4977	4	969.7
True	B	9	0	0	3	71	232	583	-1065	1276	[177,559,256,616]	85.25	0.7613	81	77	13	0.01246	1	0.001047	13	0.002988	1	0.0006807	1	2098	1	479.5
True	B	9	0	0	3	72	45	623	-1117	1268	[1,548,96,680]	92.31	0.8896	82	78	266	0.1399	23	0.02224	56	0.003419	5	0.0005963	23	4299	5	1648
True	B	9	0	0	3	73	983	62	-835	1435	[953,28,1034,105]	149.4	0.944	83	79	508	0.1541	47	0.02809	18	0.00237	2	0.0009975	47	3072	2	910.4
True	B	9	0	0	3	74	633	64	-942	1433	[605,33,662,108]	126.1	0.9169	84	80	211	0.1539	17	0.01203	60	0.02955	5	0.003754	17	4023	5	958.8
True	B	9	0	0	3	75	73	132	-1107	1413	[36,92,113,173]	166.8	0.9893	85	81	379	0.1602	31	0.0166	26	0.03237	2	0.0008485	31	3820	2	2555
True	B	9	0	0	3	76	238	156	-1060	1407	[193,125,272,184]	142.7	0.9591	86	82	383	0.1515	35	0.0219	47	0.002812	4	0.00306	35	3761	4	365
True	B	9	0	0	3	77	214	403	-1066	1332	[175,371,247,436]	153	0.9984	87	83	390	0.1384	34	0.01984	26	0.04171	2	0.001406	34	4858	2	2144
True	B	9	0	0	3	78	103	426	-1099	1324	[68,395,140,472]	149.4	0.9932	88	84	370	0.1307	34	0.02032	13	0.00153	1	0.0004776	34	3970	1	422.4
True	B	9	0	0	3	79	420	454	-1005	1318	[390,421,448,485]	132.2	0.9947	89	85	321	0.1412	28	0.01891	52	0.06673	4	0.003271	28	5071	4	1645
True	B	9	0	0	3	80	145	530	-1087	1294	[100,487,184,568]	154.5	0.9871	90	86	396	0.1686	35	0.02022	0	0	0	0	35	4382	0	NaN
True	B	9	0	0	3	81	273	543	-1049	1289	[239,507,307,597]	157.7	0.9738	91	87	534	0.147	49	0.02775	13	0.002309	1	0.0004892	49	4567	1	498.7
True	B	9	0	0	4	1	721	23	-592	1447	[686,1,754,45]	81.68	0.9423	5	5	233	0.1753	19	0.02077	0	0	0	0	19	3767	0	NaN
True	B	9	0	0	4	2	350	22	-700	1446	[328,1,408,57]	118.3	0.9686	6	6	288	0.1604	24	0.01811	89	0.09094	7	0.005993	24	3800	7	2496
True	B	9	0	0	4	3	859	27	-550	1445	[818,1,895,59]	82.58	0.9933	7	7	224	0.1331	20	0.02162	13	0.02918	1	0.0004647	20	3175	1	3395
True	B	9	0	0	4	4	932	25	-527	1447	[889,1,1008,59]	74.1	0.9786	8	8	151	0.09903	14	0.01687	24	0.0007463	2	0.0008268	14	3075	2	360.9
True	B	9	0	0	4	5	229	44	-739	1440	[196,5,264,77]	93.82	0.9361	9	9	267	0.1421	24	0.02284	0	0	0	0	24	4005	0	NaN
True	B	9	0	0	4	6	1027	38	-501	1442	[1000,18,1053,63]	88.38	0.9335	10	10	166	0.1326	14	0.01414	39	0.08734	3	0.005	14	2941	3	1734
True	B	9	0	0	4	7	779	38	-574	1442	[746,6,808,68]	94.81	0.9724	11	11	248	0.1643	20	0.01883	24	0.00873	2	0.001914	20	3135	2	959.8
True	B	9	0	0	4	8	392	43	-692	1439	[348,9,419,78]	100.3	0.9242	12	12	202	0.1298	17	0.01514	10	0.0002579	1	0.0006169	17	3931	1	335
True	B	9	0	0	4	9	562	42	-640	1440	[539,15,585,71]	79.27	0.9366	13	13	240	0.1202	23	0.0259	13	0.04038	1	0.001034	23	4420	1	2867
True	B	9	0	0	4	10	992	47	-510	1440	[970,11,1023,81]	55.08	0.9117	14	14	95	0.09297	9	0.01459	19	0.0009509	2	0.001845	9	2278	2	461.4
True	B	9	0	0	4	11	126	51	-770	1439	[92,9,163,79]	109.3	0.9716	15	15	403	0.1557	36	0.02941	25	0.02157	2	0.001049	36	3580	2	1591
True	B	9	0	0	4	12	305	59	-716	1435	[276,26,332,90]	101.1	0.9573	16	16	291	0.1503	26	0.02297	39	0.0485	3	0.002879	26	4657	3	1682
True	B	9	0	0	4	13	961	45	-521	1439	[936,17,979,77]	42.49	0.7175	17	17	5	0.0003697	1	0.002101	0	0	0	0	1	363.2	0	NaN
True	B	9	0	0	4	14	462	64	-670	1433	[423,39,496,90]	103.5	0.9509	18	18	259	0.1298	23	0.01984	0	0	0	0	23	3913	0	NaN
True	B	9	0	0	4	15	675	65	-603	1433	[643,39,731,99]	109.4	0.8915	19	19	298	0.1476	26	0.02121	13	0.02117	1	0.0004643	26	3698	1	2457
True	B	9	0	0	4	16	747	76	-585	1430	[709,39,781,117]	145.7	0.9005	20	20	401	0.1549	35	0.02145	0	0	0	0	35	3386	0	NaN
True	B	9	0	0	4	17	75	82	-785	1432	[33,9,124,122]	66.95	0.9107	21	21	125	0.1586	10	0.01333	26	0.009017	2	0.0003595	10	3903	2	2003
True	B	9	0	0	4	18	809	75	-565	1430	[782,45,837,105]	86.5	0.9744	22	22	243	0.1221	22	0.0227	13	0.02399	1	0.0009425	22	4084	1	1312
True	B	9	0	0	4	19	610	88	-624	1428	[572,54,652,114]	90.61	0.9173	23	23	231	0.1392	20	0.0197	13	0.002418	1	0.0005405	20	3769	1	480.1
True	B	9	0	0	4	20	516	93	-650	1425	[487,58,575,124]	94.09	0.9477	24	24	258	0.154	23	0.02182	26	0.0298	2	0.0006601	23	4728	2	3641
True	B	9	0	0	4	21	388	98	-692	1423	[364,74,410,122]	80.25	0.9434	25	25	228	0.1892	19	0.02113	13	0.01384	1	0.001441	19	3860	1	929.4
True	B	9	0	0	4	22	900	71	-541	1429	[840,24,938,130]	74.36	0.9233	26	26	305	0.1468	29	0.03481	26	0.009285	2	0.000377	29	4878	2	1584
True	B	9	0	0	4	23	338	94	-706	1424	[310,62,368,126]	98.56	0.9435	27	27	327	0.1748	29	0.02627	0	0	0	0	29	3879	0	NaN
True	B	9	0	0	4	24	455	108	-669	1420	[431,88,496,130]	122.1	0.9415	29	29	448	0.1519	42	0.0307	13	0.05875	1	0.001592	42	4807	1	3534
True	B	9	0	0	4	25	249	128	-732	1414	[217,93,281,168]	110.2	0.957	30	30	306	0.148	26	0.02107	0	0	0	0	26	4579	0	NaN
True	B	9	0	0	4	26	304	125	-717	1414	[275,95,333,165]	73.2	0.9148	31	31	78	0.09086	6	0.007317	0	0	0	0	6	2873	0	NaN
True	B	9	0	0	4	27	595	130	-629	1412	[567,105,621,171]	76.95	0.8796	32	32	279	0.1391	26	0.03016	0	0	0	0	26	4219	0	NaN
True	B	9	0	0	4	28	428	135	-679	1409	[408,113,453,179]	97.66	0.9684	33	33	252	0.1562	22	0.02011	37	0.02665	3	0.003077	22	3688	3	858.9
True	B	9	0	0	4	29	379	145	-693	1410	[350,114,413,174]	131.3	0.8761	34	34	365	0.1296	33	0.02243	13	0.001361	1	0.0006645	33	4093	1	452.5
True	B	9	0	0	4	30	956	158	-521	1406	[890,106,1021,209]	122.6	0.8782	35	35	395	0.1352	38	0.02768	12	0.000188	1	0.0001211	38	4094	1	492.2
True	B	9	0	0	4	31	486	145	-663	1409	[448,123,511,175]	46.96	0.9591	36	36	26	0.02481	2	0.003802	29	0.00393	3	0.001837	2	2192	3	665.7
True	B	9	0	0	4	32	545	151	-647	1405	[499,119,579,218]	63.92	0.9319	37	37	52	0.07467	4	0.005587	22	0.00149	2	0.0005499	4	2533	2	866.3
True	B	9	0	0	4	33	664	161	-609	1404	[625,127,703,195]	128.5	0.9519	38	38	317	0.1631	27	0.01876	0	0	0	0	27	4077	0	NaN
True	B	9	0	0	4	34	772	169	-575	1401	[741,142,808,203]	86.41	0.9113	39	39	161	0.1289	13	0.01343	18	0.008581	2	0.001115	13	3159	2	1135
True	B	9	0	0	4	35	466	187	-666	1396	[428,159,508,228]	71.77	0.9373	40	40	264	0.1586	23	0.02861	13	0.003522	1	0.0004175	23	4121	1	1601
True	B	9	0	0	4	36	571	193	-639	1393	[514,159,609,239]	55.17	0.9514	41	41	75	0.1191	6	0.009709	0	0	0	0	6	3638	0	NaN
True	B	9	0	0	4	37	770	218	-577	1388	[744,195,801,241]	84.81	0.9524	42	42	196	0.143	17	0.01789	13	0.02461	1	0.001276	17	4056	1	2543
True	B	9	0	0	4	38	684	218	-604	1387	[628,188,740,252]	141	0.786	43	43	409	0.1532	36	0.0228	13	0.0005531	1	0.0003975	36	4511	1	490.8
True	B	9	0	0	4	39	804	242	-566	1382	[777,203,835,269]	91.5	0.9034	44	44	134	0.09885	12	0.01171	0	0	0	0	12	2396	0	NaN
True	B	9	0	0	4	40	680	263	-603	1375	[647,237,717,287]	106.6	0.9297	45	45	342	0.13	32	0.0268	13	0.03678	1	0.0008019	32	5261	1	3720
True	B	9	0	0	4	41	770	270	-578	1371	[738,241,802,311]	99.27	0.9573	46	46	346	0.139	32	0.02878	52	0.0404	4	0.002189	32	4446	4	1295
True	B	9	0	0	4	42	975	83	-516	1427	[930,54,1028,118]	144.4	0.9828	47	47	445	0.15	39	0.0241	10	0.0002735	1	0.0005714	39	2952	1	279.5
True	B	9	0	0	4	43	782	116	-573	1418	[751,77,823,147]	135.3	1.017	48	48	393	0.1403	35	0.02309	0	0	0	0	35	4634	0	NaN
True	B	9	0	0	5	1	670	33	-283	1443	[627,1,722,77]	128.6	0.9357	11	9	400	0.1095	40	0.02776	63	0.03231	6	0.001656	40	4237	6	2849
True	B	9	0	0	5	2	372	21	-371	1447	[348,1,417,47]	70.88	0.8101	12	10	12	0.001064	1	0.001259	0	0	0	0	1	579.3	0	NaN
True	B	9	0	0	5	3	220	28	-419	1445	[176,1,250,56]	96.5	0.9617	13	11	280	0.1274	24	0.0222	58	0.08195	5	0.004916	24	4098	5	2616
True	B	9	0	0	5	4	572	22	-313	1445	[533,1,613,58]	68.83	0.949	14	12	145	0.1359	13	0.01686	48	0.003698	4	0.002052	13	5337	4	724.3
True	B	9	0	0	5	5	91	30	-457	1443	[62,4,118,62]	46.15	0.7457	15	13	13	0.05691	1	0.001934	0	0	0	0	1	2749	0	NaN
True	B	9	0	0	5	6	993	49	-187	1439	[956,15,1034,85]	112.8	0.9336	16	14	320	0.1052	32	0.02532	0	0	0	0	32	3575	0	NaN
True	B	9	0	0	5	7	799	45	-245	1440	[777,12,832,77]	70.88	0.7927	17	15	231	0.1352	21	0.02645	13	0.005294	1	0.0007179	21	4064	1	1249
True	B	9	0	0	5	8	126	50	-446	1437	[99,24,154,76]	79.54	0.9494	18	16	176	0.1259	16	0.01796	13	0.001345	1	0.0008091	16	4003	1	343.1
True	B	9	0	0	5	9	613	43	-300	1439	[593,21,638,73]	41.33	0.9321	19	17	36	0.1344	3	0.006479	48	0.01608	5	0.004456	3	4594	5	804.2
True	B	9	0	0	5	10	386	56	-368	1437	[349,26,421,82]	90.52	0.9892	20	18	245	0.1428	21	0.02071	12	0.000402	1	0.0007524	21	4373	1	325.9
True	B	9	0	0	5	11	53	50	-469	1437	[27,28,82,72]	88.29	0.975	21	19	235	0.1148	21	0.02123	26	0.02644	2	0.002747	21	3244	2	1461
True	B	9	0	0	5	12	464	65	-346	1434	[429,31,492,93]	132	0.9759	22	20	405	0.1632	35	0.02366	36	0.02562	3	0.002385	35	4631	3	1426
True	B	9	0	0	5	13	253	84	-408	1426	[222,52,290,123]	112.4	0.914	23	21	283	0.1288	26	0.02065	18	0.0004257	2	0.0009588	26	4508	2	366.5
True	B	9	0	0	5	14	335	77	-386	1423	[290,42,369,172]	117.7	0.9303	24	22	426	0.1159	40	0.03033	0	0	0	0	40	5050	0	NaN
True	B	9	0	0	5	15	794	98	-248	1424	[742,54,827,142]	143.6	0.9153	25	23	400	0.1524	35	0.02175	0	0	0	0	35	3926	0	NaN
True	B	9	0	0	5	16	183	84	-428	1427	[159,56,219,110]	92.13	0.9361	26	24	319	0.163	27	0.02616	21	0.0137	2	0.001546	27	3919	2	908.3
True	B	9	0	0	5	17	512	79	-332	1428	[483,53,536,105]	68.47	0.9581	28	26	207	0.1321	19	0.02477	10	0.0005395	1	0.000846	19	5249	1	430.3
True	B	9	0	0	5	18	421	90	-358	1427	[384,26,458,119]	127.5	0.9477	29	27	348	0.131	33	0.02311	13	0.01008	1	0.0005222	33	4920	1	1090
True	B	9	0	0	5	19	857	85	-226	1428	[828,51,896,115]	88.91	0.8613	30	28	325	0.1529	30	0.03012	13	0.02169	1	0.0006519	30	3739	1	1862
True	B	9	0	0	5	20	94	104	-454	1423	[53,69,136,130]	106.5	0.8941	31	29	182	0.108	16	0.01341	26	0.01971	2	0.001092	16	3701	2	2042
True	B	9	0	0	5	21	700	102	-276	1423	[654,62,736,145]	176.4	0.8176	32	30	595	0.1336	55	0.02783	6	0	1	0.0003984	55	4265	1	725.5
True	B	9	0	0	5	22	931	101	-206	1421	[908,82,960,135]	99.54	0.876	33	31	286	0.1264	27	0.02422	20	0.03138	2	0.002878	27	3806	2	1878
True	B	9	0	0	5	23	894	121	-217	1419	[865,68,920,146]	113.5	0.8856	34	32	220	0.1218	20	0.01574	13	0.01488	1	0.0008795	20	4088	1	889.8
True	B	9	0	0	5	24	1031	107	-176	1421	[995,68,1065,137]	127.1	0.9635	35	33	453	0.1482	40	0.02809	44	0.03314	4	0.00252	40	2986	4	1369
True	B	9	0	0	5	25	23	109	-478	1419	[1,72,49,147]	82.13	0.9786	36	34	227	0.1332	19	0.02065	11	0.0003262	1	0.0006135	19	3284	1	329.6
True	B	9	0	0	5	26	374	120	-373	1415	[348,91,402,157]	104.1	0.8738	37	35	239	0.1554	19	0.0163	5	0	1	0.0007704	19	3819	1	314
True	B	9	0	0	5	27	750	128	-260	1414	[715,90,785,160]	99.45	0.8671	38	36	277	0.1746	23	0.02065	11	0.0009177	1	0.0006605	23	4209	1	681.7
True	B	9	0	0	5	28	71	132	-464	1413	[41,104,96,156]	45.53	0.8861	39	37	10	0.001146	1	0.001961	0	0	0	0	1	746.8	0	NaN
True	B	9	0	0	5	29	533	129	-325	1415	[493,97,567,161]	127.2	0.938	40	38	396	0.1278	36	0.02526	23	0.01206	2	0.0009611	36	4681	2	1426
True	B	9	0	0	5	30	206	125	-425	1415	[161,105,238,150]	91.15	0.8652	41	39	235	0.1297	20	0.01959	0	0	0	0	20	3711	0	NaN
True	B	9	0	0	5	31	624	144	-298	1411	[604,102,648,171]	107.7	0.9444	42	40	354	0.1533	32	0.02653	26	0.09054	2	0.002291	32	5061	2	3398
True	B	9	0	0	5	32	660	135	-288	1414	[636,99,681,158]	54.81	0.9753	43	41	93	0.03717	9	0.01466	0	0	0	0	9	1049	0	NaN
True	B	9	0	0	5	33	135	140	-444	1411	[103,108,165,167]	76.59	0.9179	44	42	107	0.06843	10	0.01166	11	0.0005912	1	0.000625	10	2793	1	521.5
True	B	9	0	0	5	34	453	145	-348	1409	[418,113,488,179]	127.4	0.9736	45	43	219	0.1155	18	0.01261	13	0.003436	1	0.0005814	18	3490	1	1192
True	B	9	0	0	5	35	402	148	-364	1409	[372,115,426,171]	53.92	0.98	46	44	90	0.1362	7	0.01159	24	0.003409	2	0.002195	7	3514	2	697.3
True	B	9	0	0	5	36	236	163	-415	1402	[193,123,275,226]	70.43	0.8439	47	45	133	0.06706	11	0.01394	52	0.02085	4	0.0008979	11	2141	4	1782
True	B	9	0	0	5	37	790	165	-247	1402	[765,137,822,200]	91.95	0.906	48	46	296	0.1431	27	0.02621	0	0	0	0	27	4919	0	NaN
True	B	9	0	0	5	38	900	174	-215	1400	[866,143,937,215]	123.2	0.955	49	47	307	0.1472	27	0.01957	13	0.007431	1	0.0005192	27	4234	1	1188
True	B	9	0	0	5	39	45	168	-471	1401	[19,147,62,202]	41.87	0.7941	50	48	51	0.1865	4	0.008529	82	0.1152	7	0.009736	4	2688	7	2037
True	B	9	0	0	5	40	170	171	-432	1400	[142,148,204,202]	64.36	0.9479	51	49	85	0.1005	7	0.009709	0	0	0	0	7	3750	0	NaN
True	B	9	0	0	5	41	418	178	-359	1399	[386,155,452,202]	109.9	0.9464	52	50	321	0.1246	30	0.02437	13	0.05993	1	0.001319	30	5111	1	3995
True	B	9	0	0	5	42	109	186	-450	1398	[81,155,146,205]	47.76	0.8253	53	51	52	0.1248	4	0.007477	64	0.1015	5	0.003367	4	2019	5	2605
True	B	9	0	0	5	43	965	192	-196	1395	[926,156,1000,239]	163.5	0.7265	54	52	359	0.1346	33	0.01801	47	0.04045	4	0.002082	33	3872	4	1434
True	B	9	0	0	5	44	723	187	-269	1397	[693,159,754,213]	79	0.9796	55	53	205	0.1485	18	0.02034	36	0.03663	4	0.002882	18	4149	4	1411
True	B	9	0	0	5	45	1049	192	-171	1396	[1007,148,1078,231]	107.1	0.9234	56	54	370	0.1261	36	0.03	13	0.003357	1	0.0004591	36	4313	1	469.1
True	B	9	0	0	5	46	591	206	-307	1391	[570,181,618,226]	82.67	0.9175	57	55	243	0.1739	21	0.02268	26	0.09207	2	0.003711	21	4116	2	2559
True	B	9	0	0	5	47	654	217	-289	1388	[617,181,685,250]	122.7	0.9615	58	56	466	0.1382	44	0.03202	39	0.07638	3	0.001772	44	4960	3	2996
True	B	9	0	0	5	48	168	219	-434	1387	[140,190,207,248]	99.36	0.9288	59	57	211	0.1353	17	0.01527	35	0.04071	3	0.001929	17	3869	3	1660
True	B	9	0	0	5	49	510	206	-332	1391	[480,171,542,243]	120.1	0.899	60	58	308	0.1375	28	0.02082	46	0.007503	4	0.002488	28	4419	4	743.4
True	B	9	0	0	5	50	456	217	-347	1388	[427,179,483,253]	96.32	0.9709	61	59	247	0.1334	21	0.01946	39	0.02042	3	0.001682	21	4945	3	730
True	B	9	0	0	5	51	846	209	-232	1390	[812,159,879,259]	143.1	0.9608	62	60	391	0.143	36	0.02246	48	0.02445	4	0.001635	36	4666	4	1107
True	B	9	0	0	5	52	715	240	-271	1382	[680,211,744,269]	91.5	0.963	63	61	352	0.122	35	0.03415	13	0.006524	1	0.0006369	35	5187	1	885.8
True	B	9	0	0	5	53	929	238	-205	1382	[911,211,963,259]	79.9	0.9409	64	62	199	0.1465	18	0.02011	52	0.0962	4	0.006568	18	3612	4	2263
True	B	9	0	0	5	54	895	225	-217	1385	[871,198,916,253]	64.36	0.973	65	63	154	0.1468	13	0.01803	0	0	0	0	13	3624	0	NaN
True	B	9	0	0	5	55	541	253	-324	1376	[499,225,571,289]	116.8	0.8844	66	64	361	0.1301	34	0.02599	20	0.001215	2	0.001394	34	5170	2	596.8
True	B	9	0	0	5	56	601	259	-304	1376	[560,221,640,291]	148.5	0.9489	67	65	480	0.1565	43	0.02584	39	0.05133	3	0.001724	43	4800	3	1807
True	B	9	0	0	5	57	812	242	-241	1379	[789,216,844,274]	101	0.9668	68	66	232	0.1644	20	0.01768	13	0.06812	1	0.001133	20	4369	1	4023
True	B	9	0	0	5	58	1003	252	-184	1375	[974,223,1034,307]	108.4	0.9968	69	67	377	0.1591	34	0.02801	0	0	0	0	34	4139	0	NaN
True	B	9	0	0	5	59	881	279	-220	1370	[854,250,925,314]	115.6	0.8954	70	68	350	0.1598	32	0.02471	0	0	0	0	32	4209	0	NaN
True	B	9	0	0	5	60	795	285	-246	1368	[764,254,840,311]	101.5	0.9598	71	69	278	0.1355	25	0.02199	26	0.00472	2	0.001357	25	4411	2	380.3
True	B	9	0	0	5	61	695	286	-277	1367	[670,258,721,315]	111.5	0.9012	72	70	435	0.1528	40	0.03203	13	0.07003	1	0.001247	40	4503	1	3719
True	B	9	0	0	5	62	643	295	-291	1365	[607,263,676,326]	101.8	0.9712	74	71	417	0.1574	38	0.03333	11	0.0002816	1	0.0006254	38	5191	1	295.9
True	B	9	0	0	5	63	566	297	-315	1363	[524,268,614,327]	107.6	0.9533	75	72	304	0.1557	25	0.02075	13	0.009167	1	0.0005068	25	3944	1	992.8
True	B	9	0	0	5	64	1033	322	-175	1356	[994,289,1072,365]	150.2	0.9317	76	73	533	0.1452	51	0.0303	37	0.03731	3	0.001462	51	3897	3	1533
True	B	9	0	0	5	65	854	331	-229	1354	[822,302,884,361]	96.41	0.9315	77	74	293	0.1394	28	0.02593	0	0	0	0	28	4925	0	NaN
True	B	9	0	0	5	66	904	320	-214	1358	[879,286,928,353]	42.4	0.8884	78	75	13	0.008033	1	0.002105	39	0.05129	3	0.00177	1	1149	3	2109
True	B	9	0	0	5	67	565	75	-315	1431	[531,41,600,105]	131.8	0.9837	79	76	398	0.1606	35	0.02371	50	0.06691	4	0.002725	35	4366	4	2339
True	B	9	0	0	6	1	991	29	133	1445	[941,1,1027,63]	117.4	0.9287	6	5	312	0.1339	27	0.02053	13	0.0009038	1	0.0005112	27	3104	1	279.3
True	B	9	0	0	6	2	845	26	92	1445	[808,1,881,51]	121.9	0.9854	7	6	384	0.1451	36	0.02637	0	0	0	0	36	3542	0	NaN
True	B	9	0	0	6	3	264	25	-85	1447	[165,1,321,58]	83.11	0.974	9	8	225	0.1476	19	0.02041	43	0.005787	4	0.001221	19	3039	4	952
True	B	9	0	0	6	4	902	27	107	1444	[873,1,930,64]	90.7	0.9477	10	9	267	0.1673	23	0.02264	0	0	0	0	23	3603	0	NaN
True	B	9	0	0	6	5	431	57	-33	1434	[401,11,461,121]	108.6	0.8872	11	10	377	0.157	35	0.02878	30	0.01405	3	0.001078	35	4338	3	1131
True	B	9	0	0	6	6	233	66	-93	1433	[198,21,263,109]	125.8	0.8994	12	11	385	0.1623	34	0.02413	0	0	0	0	34	3773	0	NaN
True	B	9	0	0	6	7	518	51	-8	1437	[461,16,549,96]	93.73	0.9356	13	12	314	0.1579	28	0.02667	13	0.002697	1	0.0004105	28	3832	1	562.8
True	B	9	0	0	6	8	778	58	69	1436	[743,9,806,94]	101.2	0.9583	14	13	362	0.1483	32	0.02822	0	0	0	0	32	4000	0	NaN
True	B	9	0	0	6	9	351	61	-56	1434	[329,44,383,80]	91.77	0.9542	15	14	255	0.1496	22	0.0214	26	0.149	2	0.006452	22	3142	2	2740
True	B	9	0	0	6	10	942	61	119	1437	[906,1,972,92]	103.5	0.9509	16	15	307	0.1688	27	0.0233	18	0.006433	2	0.0009054	27	3715	2	2047
True	B	9	0	0	6	11	87	65	-135	1431	[61,38,115,113]	87.66	0.9392	17	16	251	0.1615	20	0.02037	0	0	0	0	20	3090	0	NaN
True	B	9	0	0	6	12	180	69	-107	1431	[155,42,218,99]	123.6	0.957	18	17	417	0.1526	36	0.02599	45	0.06313	4	0.00353	36	3809	4	1468
True	B	9	0	0	6	13	863	74	95	1432	[814,44,906,104]	106.4	0.9473	19	18	377	0.1278	38	0.03188	0	0	0	0	38	4524	0	NaN
True	B	9	0	0	6	14	130	90	-122	1431	[102,21,159,122]	156.6	0.9166	20	19	417	0.1423	37	0.02109	13	0.0008458	1	0.0004733	37	3814	1	323.9
True	B	9	0	0	6	15	1028	84	146	1428	[994,50,1060,126]	156.7	0.9391	21	20	442	0.1433	40	0.02279	26	0.02248	2	0.001268	40	3209	2	1432
True	B	9	0	0	6	16	650	80	30	1429	[598,61,672,108]	118.2	0.9324	22	21	396	0.1574	37	0.02795	39	0.1136	3	0.004329	37	5011	3	2544
True	B	9	0	0	6	17	729	89	54	1427	[671,61,763,121]	100.3	0.9832	23	22	274	0.1413	23	0.02048	37	0.01013	3	0.0012	23	4555	3	1159
True	B	9	0	0	6	18	574	83	10	1428	[542,51,608,116]	135.3	0.9303	25	23	482	0.141	46	0.03034	26	0.02664	2	0.001299	46	4739	2	2329
True	B	9	0	0	6	19	822	96	84	1426	[787,45,852,127]	103.6	0.9519	26	24	329	0.1504	29	0.02498	13	0.0006738	1	0.0006812	29	4339	1	377.7
True	B	9	0	0	6	20	324	93	-66	1424	[286,65,357,120]	143.6	0.9712	27	25	249	0.1541	22	0.01367	13	0.0111	1	0.00119	22	3548	1	1481
True	B	9	0	0	6	21	471	90	-20	1425	[437,53,513,126]	120.2	0.9241	28	26	268	0.1381	23	0.01709	13	0.02725	1	0.0005305	23	5285	1	2969
True	B	9	0	0	6	22	986	103	132	1424	[959,61,1008,131]	100.2	0.9237	29	27	191	0.1349	16	0.01426	26	0.0108	2	0.001842	16	2924	2	999.3
True	B	9	0	0	6	23	780	116	72	1417	[745,89,820,146]	65.44	0.9329	30	28	124	0.1385	10	0.01364	15	0.0003693	2	0.0009985	10	3533	2	574.3
True	B	9	0	0	6	24	689	119	45	1418	[662,91,731,140]	63.11	0.8376	31	29	19	0.002029	2	0.002829	0	0	0	0	2	585.3	0	NaN
True	B	9	0	0	6	25	595	134	17	1413	[579,116,616,151]	89.9	0.8941	32	30	216	0.1624	19	0.01887	0	0	0	0	19	3933	0	NaN
True	B	9	0	0	6	26	382	131	-47	1411	[356,105,411,172]	88.38	0.9039	33	31	273	0.1422	24	0.02424	11	0.0002737	1	0.0005417	24	4327	1	467.2
True	B	9	0	0	6	27	307	148	-72	1411	[241,106,357,186]	118.7	0.9012	34	32	370	0.1611	33	0.02481	10	0.0002062	1	0.0002682	33	4447	1	320.7
True	B	9	0	0	6	28	725	144	54	1410	[688,119,748,166]	100.7	0.8906	35	33	276	0.1505	27	0.02394	13	0.02423	1	0.001445	27	4433	1	2248
True	B	9	0	0	6	29	934	148	119	1409	[904,114,973,178]	50.08	0.8267	36	34	39	0.03958	3	0.005348	26	0.04013	2	0.0007746	3	2255	2	3077
True	B	9	0	0	6	30	141	147	-123	1408	[83,116,174,176]	77.22	0.9552	37	35	252	0.1357	24	0.02775	23	0.001072	3	0.0009665	24	4243	3	844.6
True	B	9	0	0	6	31	663	151	37	1407	[636,118,692,188]	111.2	0.9438	38	36	389	0.1374	37	0.0297	26	0.005288	2	0.001455	37	5785	2	828.7
True	B	9	0	0	6	32	992	146	135	1409	[960,121,1022,169]	58.29	0.7794	39	37	0	0	0	0	26	0.02858	2	0.001442	0	NaN	2	1785
True	B	9	0	0	6	33	34	155	-151	1406	[1,124,76,191]	129	0.9289	41	38	448	0.1278	42	0.02907	25	0.004392	2	0.001011	42	3575	2	963.8
True	B	9	0	0	6	34	262	179	-82	1399	[233,147,295,212]	83.38	0.9758	42	39	289	0.117	27	0.02891	13	0.007369	1	0.0005371	27	5070	1	1334
True	B	9	0	0	6	35	705	187	50	1398	[672,159,734,212]	95.97	0.8919	43	40	195	0.1217	16	0.01488	18	0.0005173	2	0.001963	16	4126	2	438.3
True	B	9	0	0	6	36	990	193	134	1396	[953,161,1022,218]	92.75	0.9498	44	41	214	0.1038	18	0.01732	13	0.003933	1	0.0005488	18	3265	1	538.5
True	B	9	0	0	6	37	332	190	-62	1396	[298,163,360,216]	86.59	0.8932	45	42	266	0.1757	22	0.02268	26	0.002628	2	0.001559	22	4464	2	352.8
True	B	9	0	0	6	38	443	188	-29	1396	[414,164,471,214]	91.68	0.886	46	43	252	0.167	21	0.02045	64	0.09874	5	0.004374	21	4275	5	1693
True	B	9	0	0	6	39	390	209	-46	1392	[349,164,423,247]	134.4	0.9599	47	44	384	0.1565	33	0.02191	11	0.0002657	1	0.0003953	33	5056	1	271.4
True	B	9	0	0	6	40	535	201	1	1393	[503,153,589,235]	48.74	0.8132	48	45	43	0.006256	4	0.007326	88	0.03704	7	0.001839	4	1026	7	2427
True	B	9	0	0	6	41	676	216	39	1389	[636,185,706,245]	59.01	0.9762	49	46	125	0.135	11	0.01664	24	0.0144	2	0.001007	11	4909	2	1021
True	B	9	0	0	6	42	642	239	30	1381	[615,210,667,267]	76.77	0.9408	50	47	222	0.1422	20	0.02326	13	0.00822	1	0.0008306	20	4456	1	850.5
True	B	9	0	0	6	43	542	253	1	1377	[514,225,574,288]	56.06	0.9471	51	48	120	0.1091	10	0.01592	13	0.02301	1	0.0005605	10	3705	1	2914
True	B	9	0	0	6	44	492	260	-14	1376	[464,222,524,292]	110.5	0.9403	52	49	338	0.1333	30	0.02423	26	0.01292	2	0.001189	30	5337	2	726.8
True	B	9	0	0	6	45	527	308	-5	1360	[491,275,557,344]	74.99	0.876	53	50	104	0.09981	8	0.009524	13	0.002311	1	0.0004297	8	2829	1	475.3
True	B	9	0	0	6	46	928	775	113	1218	[890,760,942,810]	85.16	0.8311	54	51	13	0.001612	1	0.001048	0	0	0	0	1	433.6	0	NaN
True	B	9	0	0	6	47	874	815	100	1207	[845,788,900,862]	83.91	1.003	55	52	156	0.1265	14	0.01489	0	0	0	0	14	3581	0	NaN
True	B	9	0	0	6	48	764	828	70	1207	[726,794,825,860]	125	0.8511	56	53	411	0.1664	36	0.02571	26	0.005681	2	0.0008055	36	4329	2	1404
True	B	9	0	0	6	49	923	832	114	1204	[887,801,951,865]	109.9	0.9372	57	54	332	0.1448	29	0.02356	22	0.004643	2	0.001405	29	4279	2	746.5
True	B	9	0	0	6	50	714	851	52	1198	[683,826,739,881]	83.2	0.9746	58	55	285	0.1365	27	0.02897	18	0.0009902	2	0.002433	27	5275	2	349.2
True	B	9	0	0	6	51	790	856	77	1198	[767,833,827,877]	104.3	0.8665	59	56	310	0.136	27	0.02312	10	0.0003089	1	0.001616	27	4948	1	396.9
True	B	9	0	0	6	52	752	879	64	1190	[725,852,781,905]	109.8	0.9842	60	57	348	0.1824	30	0.02439	13	0.05756	1	0.001304	30	3475	1	2909
True	B	9	0	0	6	53	913	873	112	1192	[882,851,942,898]	95.34	0.9449	61	58	373	0.177	33	0.0309	26	0.09149	2	0.002972	33	3964	2	2404
True	B	9	0	0	6	54	815	894	84	1187	[777,857,860,925]	148.3	0.9723	62	59	439	0.1359	41	0.02468	26	0.01791	2	0.001	41	4256	2	999.4
True	B	9	0	0	6	55	693	892	44	1186	[643,865,727,924]	176.8	0.813	63	60	401	0.1324	36	0.01818	73	0.07666	6	0.004963	36	4167	6	1528
True	B	9	0	0	6	56	879	898	101	1186	[855,858,906,922]	108.6	0.9782	64	61	316	0.167	29	0.02383	26	0.01638	2	0.002451	29	4552	2	945.6
True	B	9	0	0	6	57	660	929	38	1174	[627,898,709,967]	140.8	0.8685	65	62	477	0.1319	46	0.02917	0	0	0	0	46	4193	0	NaN
True	B	9	0	0	6	58	596	930	17	1175	[557,899,633,962]	141.8	0.9556	66	63	474	0.1352	46	0.02897	38	0.015	3	0.001467	46	4590	3	894.7
True	B	9	0	0	6	59	766	929	67	1176	[725,900,801,959]	140.6	0.9763	67	64	442	0.1716	40	0.0254	12	0.0008466	1	0.0006234	40	3692	1	412
True	B	9	0	0	6	60	493	138	-15	1409	[459,110,521,191]	132.4	0.9599	70	66	299	0.1285	27	0.01821	31	0.02008	3	0.001978	27	4682	3	1192
True	B	9	0	0	7	1	921	22	435	1447	[870,1,951,44]	118	0.882	5	4	389	0.1204	37	0.02799	13	0.01912	1	0.0009124	37	3277	1	1743
True	B	9	0	0	7	2	603	41	342	1442	[573,1,633,69]	93.11	0.8674	7	6	259	0.1178	25	0.02397	13	0.009618	1	0.0005666	25	4445	1	910.7
True	B	9	0	0	7	3	201	33	222	1442	[161,1,238,81]	107.9	0.9844	8	7	289	0.1186	27	0.02233	13	0.003604	1	0.0004873	27	4727	1	597.4
True	B	9	0	0	7	4	965	38	450	1441	[932,8,1008,69]	93.91	0.9466	9	8	268	0.1262	24	0.02281	0	0	0	0	24	3714	0	NaN
True	B	9	0	0	7	5	777	50	392	1442	[722,1,804,81]	116	0.9052	10	9	368	0.1531	33	0.0254	96	0.0699	8	0.002965	33	4360	8	3282
True	B	9	0	0	7	6	856	53	418	1437	[825,18,892,86]	118.4	0.8605	11	10	426	0.1485	41	0.03092	26	0.04698	2	0.00134	41	3969	2	2081
True	B	9	0	0	7	7	534	38	319	1444	[451,1,596,87]	94.09	0.9787	13	11	220	0.146	19	0.01803	52	0.02102	4	0.0006726	19	4337	4	2518
True	B	9	0	0	7	8	1009	73	465	1431	[984,27,1040,113]	117.1	0.945	15	12	375	0.1148	34	0.02591	13	0.01069	1	0.0005568	34	3745	1	1344
True	B	9	0	0	7	9	82	84	186	1428	[38,50,129,125]	121.6	0.9305	16	13	280	0.1075	24	0.01762	50	0.006087	4	0.001511	24	2534	4	738.5
True	B	9	0	0	7	10	179	78	216	1428	[140,47,219,111]	100.5	0.9074	17	14	365	0.1265	34	0.0302	0	0	0	0	34	3972	0	NaN
True	B	9	0	0	7	11	811	79	405	1428	[783,51,842,109]	82.58	0.9377	18	15	306	0.1542	28	0.03027	79	0.02556	7	0.005315	28	5113	7	651.7
True	B	9	0	0	7	12	477	87	303	1427	[435,56,505,124]	110.7	0.9412	19	16	416	0.1268	38	0.03065	13	0.02766	1	0.0005807	38	4903	1	2972
True	B	9	0	0	7	13	330	86	260	1427	[302,40,358,128]	137.7	0.956	20	17	325	0.1675	27	0.01751	10	8.921e-05	1	0.0005208	27	3377	1	308.3
True	B	9	0	0	7	14	272	88	243	1424	[223,48,305,146]	142.9	0.9601	21	18	483	0.1424	44	0.02748	0	0	0	0	44	4478	0	NaN
True	B	9	0	0	7	15	446	116	298	1416	[422,86,497,154]	121.4	0.8734	22	19	336	0.1221	33	0.02426	0	0	0	0	33	4935	0	NaN
True	B	9	0	0	7	16	674	115	363	1419	[640,83,713,151]	126.6	0.9438	23	20	426	0.1558	38	0.0268	39	0.04876	3	0.001701	38	5247	3	1763
True	B	9	0	0	7	17	368	120	271	1414	[345,97,392,158]	122	0.9411	24	21	377	0.1435	34	0.02487	13	0.05037	1	0.001344	34	4187	1	3287
True	B	9	0	0	7	18	153	132	208	1414	[124,96,187,163]	90.16	0.9444	25	22	175	0.1176	15	0.01485	26	0.008121	2	0.0009153	15	3873	2	746.6
True	B	9	0	0	7	19	581	143	335	1409	[554,112,608,190]	153.3	0.9126	26	23	552	0.1522	51	0.0297	13	0.04203	1	0.0009662	51	4736	1	2739
True	B	9	0	0	7	20	62	138	178	1411	[25,108,92,169]	116.7	0.9429	27	24	303	0.1426	25	0.01913	13	0.01569	1	0.0006042	25	3377	1	2047
True	B	9	0	0	7	21	872	141	423	1412	[842,99,913,169]	101.5	0.8371	28	25	204	0.1276	18	0.01583	13	0.004665	1	0.0005981	18	3870	1	638.9
True	B	9	0	0	7	22	201	137	221	1411	[178,106,222,166]	46.78	0.9423	29	26	104	0.116	8	0.01527	25	0.003001	2	0.001499	8	2580	2	723.7
True	B	9	0	0	7	23	749	136	385	1412	[723,112,772,163]	84.63	0.9406	30	27	295	0.1541	27	0.02848	13	0.05375	1	0.001418	27	4215	1	2835
True	B	9	0	0	7	24	702	157	371	1407	[664,121,731,187]	112.2	0.9218	31	28	343	0.1558	30	0.02387	26	0.01546	2	0.001369	30	4631	2	1186
True	B	9	0	0	7	25	426	158	288	1403	[392,130,460,202]	107.5	0.9075	33	29	277	0.1588	24	0.01993	13	0.002333	1	0.0005102	24	4959	1	1072
True	B	9	0	0	7	26	542	166	325	1401	[517,124,571,212]	91.24	0.8745	34	30	238	0.1168	22	0.02153	18	0.007045	2	0.001099	22	4785	2	953.3
True	B	9	0	0	7	27	636	164	349	1403	[596,135,661,202]	99.81	0.9407	35	31	369	0.1537	32	0.02862	0	0	0	0	32	4648	0	NaN
True	B	9	0	0	7	28	290	176	248	1400	[260,142,321,211]	98.82	0.9258	36	32	286	0.165	24	0.02168	23	0.00232	2	0.001077	24	3995	2	586.4
True	B	9	0	0	7	29	372	178	273	1400	[346,146,401,206]	76.77	0.9408	37	33	176	0.1227	16	0.0186	0	0	0	0	16	4270	0	NaN
True	B	9	0	0	7	30	466	178	301	1400	[438,146,491,207]	100.6	0.9078	38	34	283	0.1216	28	0.02484	0	0	0	0	28	4866	0	NaN
True	B	9	0	0	7	31	212	185	225	1397	[185,160,244,212]	92.22	0.9076	39	35	260	0.1233	24	0.02323	0	0	0	0	24	4122	0	NaN
True	B	9	0	0	7	32	161	186	210	1397	[133,160,187,215]	58.65	0.909	40	36	156	0.07117	16	0.02435	0	0	0	0	16	2720	0	NaN
True	B	9	0	0	7	33	904	187	431	1397	[865,154,939,219]	87.84	0.9201	41	37	154	0.1046	14	0.01423	35	0.0005616	5	0.002463	14	2551	5	455.7
True	B	9	0	0	7	34	741	189	387	1399	[712,136,797,219]	137.7	0.9648	42	38	376	0.1533	35	0.02268	13	0.01389	1	0.0004699	35	4516	1	2105
True	B	9	0	0	7	35	669	194	362	1395	[637,167,697,225]	96.68	0.9141	43	39	232	0.1237	21	0.01939	13	0.05203	1	0.0009814	21	3483	1	3475
True	B	9	0	0	7	36	335	211	262	1390	[308,184,372,244]	89.18	0.9807	44	40	285	0.1558	24	0.02402	26	0.0285	2	0.001301	24	4140	2	1806
True	B	9	0	0	7	37	636	217	352	1387	[609,185,670,258]	82.4	0.9471	45	41	208	0.1143	19	0.02059	13	0.01032	1	0.0006094	19	4486	1	796.2
True	B	9	0	0	7	38	425	226	289	1385	[398,205,448,248]	84.72	0.9736	46	42	200	0.1426	18	0.01897	13	0.04466	1	0.001795	18	3813	1	2880
True	B	9	0	0	7	39	436	271	292	1371	[404,240,468,301]	95.61	0.9667	48	43	188	0.102	17	0.01587	40	0.03157	4	0.00236	17	4405	4	1548
True	B	9	0	0	7	40	494	276	309	1370	[462,248,528,302]	99.63	1.001	49	44	269	0.1259	25	0.0224	26	0.01604	2	0.001191	25	4640	2	1109
True	B	9	0	0	7	41	251	688	234	1247	[206,666,273,718]	107.3	0.7099	50	45	116	0.106	9	0.007488	160	0.1544	13	0.01517	9	1779	13	2201
True	B	9	0	0	7	42	308	722	253	1236	[279,694,332,765]	111.2	0.9817	51	46	336	0.1461	30	0.02408	0	0	0	0	30	4191	0	NaN
True	B	9	0	0	7	43	256	731	237	1235	[213,703,285,761]	111.8	0.9284	52	47	244	0.1464	20	0.01597	86	0.03983	8	0.006667	20	2693	8	1083
True	B	9	0	0	7	44	362	747	271	1229	[326,716,399,781]	108.6	0.9584	53	48	306	0.155	26	0.02138	0	0	0	0	26	3619	0	NaN
True	B	9	0	0	7	45	201	756	227	1224	[176,731,259,796]	130.7	0.9443	54	49	417	0.135	37	0.02527	0	0	0	0	37	4122	0	NaN
True	B	9	0	0	7	46	712	819	370	1207	[653,795,739,849]	60.53	0.9384	55	50	185	0.1794	16	0.0236	0	0	0	0	16	3508	0	NaN
True	B	9	0	0	7	47	856	843	420	1201	[814,811,924,887]	122.7	0.953	56	51	312	0.1404	26	0.01891	13	0.0003372	1	0.0002927	26	3266	1	272.8
True	B	9	0	0	7	48	366	845	269	1200	[316,810,398,872]	120	0.875	57	52	341	0.1575	31	0.02307	12	0.005848	1	0.0005345	31	3511	1	1088
True	B	9	0	0	7	49	132	883	200	1187	[27,809,219,996]	196	0.9189	59	54	217	0.1267	17	0.007741	0	0	0	0	17	1900	0	NaN
True	B	9	0	0	7	50	343	926	266	1175	[304,892,401,965]	132.4	0.9514	60	55	405	0.1356	37	0.02495	39	0.03715	3	0.001243	37	3340	3	1660
True	B	9	0	0	7	51	956	101	447	1423	[923,69,985,131]	154.4	0.9386	61	56	387	0.1097	40	0.02313	26	0.06049	2	0.001805	40	4156	2	2420
True	B	9	0	0	7	52	702	235	372	1382	[661,202,747,268]	135	0.937	62	57	510	0.157	48	0.03175	50	0.05132	4	0.00184	48	4733	4	1715
True	B	9	0	0	7	53	1042	840	473	1201	[1002,812,1078,871]	170.2	0.9771	63	58	500	0.1285	47	0.02465	52	0.1151	4	0.00306	47	3635	4	2743
True	B	9	0	0	7	54	472	978	303	1158	[412,928,522,1046]	189.6	0.9695	64	59	643	0.1306	62	0.02919	82	0.03032	8	0.001571	62	3991	8	1258
True	B	9	0	0	7	55	987	1028	460	1149	[907,929,1078,1078]	177.6	0.9554	65	60	382	0.1219	33	0.01658	13	0.0002481	1	8.452e-05	33	1992	1	350.4
True	B	9	0	0	8	1	764	31	712	1445	[716,1,807,61]	115.9	0.9217	7	7	313	0.1113	31	0.02388	0	0	0	0	31	4808	0	NaN
True	B	9	0	0	8	2	245	26	557	1446	[212,1,275,54]	116.8	0.9258	8	8	388	0.1373	33	0.02523	26	0.03624	2	0.001747	33	3664	2	1428
True	B	9	0	0	8	3	313	39	577	1440	[274,3,345,70]	101.4	0.8943	9	9	307	0.1388	28	0.02465	26	0.03856	2	0.000943	28	5137	2	2145
True	B	9	0	0	8	4	669	43	685	1439	[644,13,699,79]	98.91	0.9455	10	10	268	0.1229	25	0.02256	18	0.02242	2	0.001765	25	4099	2	1303
True	B	9	0	0	8	5	810	57	726	1434	[767,16,849,105]	91.41	0.9418	12	11	188	0.1146	16	0.01563	38	0.01755	3	0.00107	16	3259	3	1808
True	B	9	0	0	8	6	885	48	749	1439	[861,22,916,77]	56.78	0.8357	13	12	0	0	0	0	0	0	0	0	0	NaN	0	NaN
True	B	9	0	0	8	7	627	57	672	1436	[600,22,662,84]	99.81	0.9218	14	13	375	0.1275	36	0.0322	39	0.04701	3	0.002674	36	4839	3	1568
True	B	9	0	0	8	8	240	78	557	1430	[205,45,281,110]	108.5	0.9579	15	14	293	0.09488	27	0.02222	12	0.0003911	1	0.0005184	27	3629	1	624.7
True	B	9	0	0	8	9	54	78	500	1429	[23,51,87,121]	99	0.9761	16	15	358	0.1479	33	0.02976	13	0.004571	1	0.0005999	33	3570	1	1295
True	B	9	0	0	8	10	727	67	701	1430	[698,41,756,120]	94.18	0.9482	17	16	187	0.1007	16	0.01517	25	0.0003535	3	0.001621	16	3092	3	351.6
True	B	9	0	0	8	11	852	75	739	1428	[825,42,879,127]	49.81	0.949	18	17	60	0.06065	6	0.01075	13	0.009743	1	0.0004577	6	1956	1	1309
True	B	9	0	0	8	12	905	83	754	1425	[873,52,933,136]	78.74	0.9661	19	18	72	0.07838	6	0.006803	20	0.000663	2	0.0009574	6	3444	2	391.7
True	B	9	0	0	8	13	760	96	712	1424	[734,61,788,127]	54.9	0.9487	21	20	87	0.1114	8	0.01301	10	0.0004284	1	0.000677	8	4450	1	322.6
True	B	9	0	0	8	14	671	91	687	1425	[646,69,708,119]	67.94	0.9417	22	21	199	0.1464	19	0.02497	13	0.02468	1	0.0007128	19	4709	1	3126
True	B	9	0	0	8	15	136	106	524	1421	[90,77,171,136]	135.3	0.9722	23	22	372	0.1238	34	0.02243	48	0.01238	4	0.002025	34	4568	4	754.4
True	B	9	0	0	8	16	411	95	607	1424	[380,61,440,127]	75.88	0.8821	24	23	241	0.1546	22	0.02588	13	0.01189	1	0.0005858	22	3619	1	1264
True	B	9	0	0	8	17	961	109	771	1421	[923,83,993,134]	107.4	0.9619	25	24	316	0.1509	27	0.02244	39	0.05776	3	0.002355	27	3462	3	1987
True	B	9	0	0	8	18	1039	112	795	1419	[1009,79,1068,145]	110.5	0.9684	26	25	285	0.1504	25	0.02019	13	0.01685	1	0.0009524	25	3295	1	1253
True	B	9	0	0	8	19	475	112	625	1420	[436,85,505,140]	92.48	0.9283	27	26	335	0.1583	30	0.02896	12	0.002671	1	0.0007102	30	4366	1	759.9
True	B	9	0	0	8	20	199	123	544	1415	[163,99,235,155]	90.16	0.9343	28	27	271	0.1407	24	0.02376	18	0.006377	2	0.001246	24	3647	2	888
True	B	9	0	0	8	21	258	124	562	1415	[229,93,298,157]	94	0.9573	29	28	247	0.1188	23	0.02184	13	0.01383	1	0.0005501	23	5661	1	2221
True	B	9	0	0	8	22	562	132	650	1413	[528,107,587,157]	81.06	0.9381	30	29	278	0.1376	25	0.02753	12	0.007292	1	0.0007893	25	5167	1	932.3
True	B	9	0	0	8	23	700	135	691	1412	[654,105,736,166]	49.28	0.8647	31	30	39	0.02337	4	0.007246	0	0	0	0	4	897.3	0	NaN
True	B	9	0	0	8	24	304	150	576	1407	[270,119,346,183]	155.8	0.8926	32	31	489	0.137	46	0.02636	26	0.03913	2	0.001302	46	4471	2	1847
True	B	9	0	0	8	25	379	167	598	1402	[351,137,409,200]	55.35	0.902	33	32	15	0.002032	2	0.003226	0	0	0	0	2	749.1	0	NaN
True	B	9	0	0	8	26	192	175	543	1400	[159,145,239,217]	92.48	0.8306	34	33	0	0	0	0	13	0.0005224	1	0.0004583	0	NaN	1	277.7
True	B	9	0	0	8	27	594	167	662	1402	[558,137,630,197]	99.45	0.9199	35	34	295	0.1392	27	0.02424	13	0.01545	1	0.0005507	27	3732	1	2017
True	B	9	0	0	8	28	246	176	559	1400	[215,153,280,199]	88.29	0.9535	36	35	305	0.1292	29	0.02932	26	0.01544	2	0.001972	29	3851	2	787.3
True	B	9	0	0	8	29	507	178	633	1400	[459,157,531,205]	86.95	0.8767	37	36	229	0.1599	20	0.02053	26	0.02551	2	0.001876	20	5012	2	1702
True	B	9	0	0	8	30	544	188	646	1396	[510,160,568,217]	62.49	0.8851	38	37	170	0.1442	15	0.02143	18	0.002808	2	0.001449	15	2561	2	516.3
True	B	9	0	0	8	31	424	195	612	1392	[402,168,451,238]	92.57	0.8311	39	38	313	0.1501	28	0.027	26	0.03526	2	0.001715	28	3962	2	1611
True	B	9	0	0	8	32	481	217	627	1389	[449,180,514,245]	56.96	0.9175	40	39	122	0.1574	10	0.01567	13	0.00626	1	0.0005308	10	3997	1	686.9
True	B	9	0	0	8	33	421	250	611	1377	[392,226,456,277]	107.9	0.9844	41	40	342	0.1357	30	0.02481	63	0.01506	7	0.005968	30	4458	7	1318
True	B	9	0	0	8	34	767	694	714	1246	[740,661,796,728]	98.38	0.9523	42	41	333	0.1373	31	0.02813	0	0	0	0	31	4914	0	NaN
True	B	9	0	0	8	35	583	717	661	1238	[544,690,634,747]	133	0.9291	43	42	452	0.1416	44	0.02953	13	0.001231	1	0.0005777	44	5179	1	342.5
True	B	9	0	0	8	36	686	735	690	1233	[653,702,721,766]	142.2	0.9492	44	43	484	0.1539	44	0.02762	44	0.02196	4	0.002549	44	4175	4	1519
True	B	9	0	0	8	37	779	756	717	1227	[744,723,808,790]	97.48	0.9674	45	44	258	0.1475	23	0.02106	0	0	0	0	23	2676	0	NaN
True	B	9	0	0	8	38	623	779	669	1220	[582,751,651,812]	99.63	0.9593	46	45	302	0.1631	28	0.02509	18	0.004285	2	0.001076	28	4086	2	1446
True	B	9	0	0	8	39	522	31	642	1443	[491,1,575,70]	152.6	0.9799	47	46	658	0.1215	65	0.03803	33	0.02949	3	0.001333	65	5742	3	1391
True	B	9	0	0	8	40	124	48	523	1438	[95,20,167,84]	144.4	0.9416	48	47	396	0.1209	36	0.02225	39	0.06668	3	0.002114	36	2739	3	2569
True	B	9	0	0	8	41	459	61	622	1434	[429,29,491,93]	141	0.9777	49	48	431	0.1299	39	0.0247	52	0.06546	4	0.003026	39	5039	4	1706
True	B	9	0	0	8	42	1005	72	784	1432	[966,35,1043,116]	145.1	0.9853	50	49	454	0.132	42	0.02585	57	0.02077	5	0.003151	42	3175	5	1224
True	B	9	0	0	8	43	430	145	615	1408	[402,115,475,181]	132.2	0.9947	51	50	427	0.1309	39	0.02633	0	0	0	0	39	4449	0	NaN
True	B	9	0	0	8	44	721	672	699	1252	[683,639,754,714]	147.7	0.9786	52	51	488	0.1389	47	0.0284	13	0.01468	1	0.0005187	47	4284	1	2140
True	B	9	0	0	8	45	543	749	646	1228	[502,712,578,788]	163.1	0.9848	53	52	626	0.1588	57	0.0312	0	0	0	0	57	4332	0	NaN
True	B	9	0	0	9	1	545	24	970	1446	[522,1,565,46]	87.66	0.9496	7	6	293	0.1716	26	0.02648	23	0.08114	2	0.004545	26	3414	2	1508
True	B	9	0	0	9	2	829	23	1057	1447	[805,1,868,51]	96.86	0.9638	8	7	250	0.1539	21	0.01935	20	0.001516	2	0.001852	21	3492	2	345.5
True	B	9	0	0	9	3	217	28	873	1444	[180,1,255,67]	87.66	0.929	9	8	316	0.1457	28	0.02851	47	0.02356	5	0.002755	28	3385	5	870.9
True	B	9	0	0	9	4	287	28	894	1445	[259,1,350,58]	80.61	0.8748	10	9	152	0.122	12	0.01329	9	0.0002113	1	0.0004733	12	2876	1	325
True	B	9	0	0	9	5	980	34	1100	1443	[945,1,1013,62]	110.7	0.8974	11	10	376	0.1288	35	0.02823	32	0.06254	3	0.002433	35	2987	3	2952
True	B	9	0	0	9	6	1046	42	1121	1438	[1010,1,1078,111]	73.83	0.9887	12	11	216	0.1475	19	0.02297	51	0.03505	4	0.0008332	19	2566	4	2661
True	B	9	0	0	9	7	86	53	833	1437	[57,25,115,78]	87.57	0.9185	13	12	245	0.1185	24	0.02446	0	0	0	0	24	3210	0	NaN
True	B	9	0	0	9	8	323	57	904	1436	[303,21,347,90]	69.01	0.9874	14	13	133	0.1337	12	0.01552	30	0.02765	3	0.002273	12	3303	3	1181
True	B	9	0	0	9	9	672	52	1011	1437	[637,20,727,84]	55.08	0.831	15	14	17	0.001813	2	0.003241	0	0	0	0	2	869.6	0	NaN
True	B	9	0	0	9	10	366	56	917	1436	[340,28,392,85]	71.6	0.936	16	15	219	0.1377	21	0.02618	13	0.02261	1	0.0007825	21	3662	1	1292
True	B	9	0	0	9	11	854	66	1063	1434	[811,23,888,99]	105	0.9399	17	16	361	0.1398	33	0.02806	0	0	0	0	33	3871	0	NaN
True	B	9	0	0	9	12	562	61	975	1434	[536,34,588,91]	85.43	0.9052	18	17	251	0.182	23	0.02403	47	0.007961	5	0.004562	23	4244	5	550.2
True	B	9	0	0	9	13	198	76	866	1431	[165,34,228,108]	100.3	0.9837	19	18	363	0.1284	32	0.02847	31	0.003475	3	0.001727	32	3600	3	832.5
True	B	9	0	0	9	14	632	82	997	1428	[611,62,658,102]	75.34	0.9882	20	19	287	0.1863	26	0.03081	26	0.06114	2	0.002967	26	4230	2	2212
True	B	9	0	0	9	15	683	108	1011	1421	[637,78,719,137]	115.5	0.92	21	20	357	0.1504	32	0.02473	12	0.001699	1	0.0005698	32	4277	1	407.9
True	B	9	0	0	9	16	803	114	1046	1420	[760,64,836,148]	133.2	0.9547	22	21	441	0.1304	43	0.02882	13	0.02274	1	0.0003937	43	4420	1	2989
True	B	9	0	0	9	17	531	123	966	1416	[500,84,558,163]	148.7	0.9496	23	22	601	0.1631	55	0.03301	65	0.07311	5	0.003195	55	4386	5	1706
True	B	9	0	0	9	18	863	125	1065	1416	[827,94,895,158]	82.4	0.8148	24	23	36	0.03005	3	0.00325	25	0.002526	2	0.000846	3	1908	2	373.7
True	B	9	0	0	9	19	706	157	1020	1405	[683,134,741,184]	96.59	0.9043	25	24	194	0.1158	18	0.01664	34	0.03842	3	0.003272	18	4452	3	1035
True	B	9	0	0	9	20	616	150	992	1407	[581,116,665,186]	114.6	0.9159	26	25	305	0.1605	25	0.01947	13	0.006669	1	0.0004673	25	4506	1	1120
True	B	9	0	0	9	21	842	169	1058	1403	[813,141,868,196]	62.67	0.9211	27	26	135	0.1412	11	0.01567	23	0.02363	2	0.001509	11	4445	2	1165
True	B	9	0	0	9	22	717	206	1022	1392	[682,176,751,234]	99.54	0.9896	28	27	351	0.1557	32	0.0287	13	0.02589	1	0.0005858	32	4069	1	2826
True	B	9	0	0	9	23	823	822	1053	1207	[786,781,858,856]	121.3	0.9466	29	28	437	0.1476	41	0.03017	0	0	0	0	41	4038	0	NaN
True	B	9	0	0	9	24	816	928	1052	1175	[786,898,850,971]	95.34	0.9351	30	29	309	0.1258	31	0.02903	31	0.01974	3	0.001597	31	4742	3	1229
True	B	9	0	0	9	25	778	962	1040	1163	[751,932,804,1015]	106.2	0.9956	31	30	302	0.1734	26	0.02185	0	0	0	0	26	4120	0	NaN
True	B	9	0	0	9	26	911	1007	1080	1152	[882,978,939,1057]	111.3	0.9004	32	31	430	0.1486	41	0.03288	26	0.05539	2	0.001406	41	3971	2	2254
True	B	9	0	0	9	27	783	1020	1043	1148	[760,998,808,1048]	87.49	0.9484	33	32	247	0.1604	22	0.02245	13	0.05437	1	0.00157	22	3686	1	2037
True	B	9	0	0	9	28	677	1025	1013	1147	[648,1005,726,1046]	98.73	0.889	34	33	378	0.1497	36	0.03255	0	0	0	0	36	4525	0	NaN
True	B	9	0	0	9	29	631	1036	995	1143	[582,1011,661,1070]	101.2	0.9583	35	34	302	0.1569	29	0.02557	13	0.005675	1	0.0006262	29	3631	1	502.2
True	B	9	0	0	9	30	754	1049	1032	1139	[717,1019,783,1078]	96.41	0.8943	36	35	299	0.149	26	0.02407	12	0.0006583	1	0.0005959	26	4565	1	295.5
True	B	9	0	0	10	1	523	26	1286	1446	[487,1,559,62]	68.38	0.8892	4	4	184	0.1341	16	0.02089	12	0.002969	1	0.0005583	16	3596	1	1229
True	B	9	0	0	10	2	462	29	1268	1444	[427,1,493,59]	64.28	0.9595	5	5	140	0.137	11	0.01528	10	0.0002146	1	0.0004715	11	3091	1	428.8
True	B	9	0	0	10	3	297	45	1218	1440	[254,14,323,76]	58.83	0.9228	6	6	232	0.1299	23	0.0349	26	0.02532	2	0.001167	23	4234	2	1826
True	B	9	0	0	10	4	549	51	1294	1436	[529,32,566,83]	51.78	0.9294	8	8	99	0.121	9	0.01552	78	0.1176	6	0.008276	9	2159	6	1631
True	B	9	0	0	10	5	500	58	1280	1435	[475,27,528,91]	95.25	0.9444	9	9	250	0.1309	22	0.02062	0	0	0	0	22	4190	0	NaN
True	B	9	0	0	10	6	258	72	1208	1431	[238,45,278,101]	106.1	0.9005	10	10	316	0.1363	29	0.02441	26	0.08588	2	0.003135	29	3403	2	2351
True	B	9	0	0	10	7	433	107	1259	1420	[400,75,468,154]	124	0.9078	11	11	329	0.1407	27	0.01944	39	0.02719	3	0.001463	27	4522	3	1227
True	B	9	0	0	10	8	747	114	1354	1419	[715,83,779,146]	81.15	0.9718	12	12	219	0.1224	20	0.022	13	0.02849	1	0.000488	20	5542	1	2707
True	B	9	0	0	10	9	682	119	1335	1417	[657,90,715,147]	79.36	0.9706	13	13	168	0.106	15	0.01687	13	0.004412	1	0.0006863	15	3811	1	822.1
True	B	9	0	0	10	10	70	139	1146	1412	[1,109,100,166]	84.09	0.9371	14	14	251	0.1451	21	0.02229	34	0.01727	3	0.000939	21	3024	3	1486
True	B	9	0	0	10	11	148	142	1174	1410	[107,113,179,173]	104.6	0.9288	15	15	340	0.118	31	0.02645	22	0.001789	2	0.001147	31	3756	2	517.2
True	B	9	0	0	10	12	119	175	1165	1401	[97,153,141,193]	51.33	0.8987	17	16	96	0.1212	8	0.01391	35	0.06324	3	0.004219	8	4085	3	2201
True	B	9	0	0	10	13	949	184	1414	1397	[920,157,978,221]	74.36	0.9343	18	17	109	0.09619	9	0.0108	12	0.0006298	1	0.0005757	9	3027	1	759.8
True	B	9	0	0	10	14	433	192	1260	1394	[410,167,459,230]	122.5	0.9697	19	18	382	0.151	35	0.02551	26	0.03861	2	0.002729	35	4054	2	1109
True	B	9	0	0	10	15	538	185	1292	1397	[512,158,567,214]	102.1	0.9534	20	19	283	0.1207	25	0.02185	23	0.04795	2	0.001741	25	3796	2	2055
True	B	9	0	0	10	16	208	206	1194	1391	[162,159,253,257]	109	0.8894	22	21	250	0.1459	21	0.0172	61	0.01085	6	0.001307	21	3521	6	935.6
True	B	9	0	0	10	17	339	203	1232	1393	[311,175,373,231]	54.72	0.8839	23	22	39	0.009753	3	0.004894	17	0.005707	2	0.001139	3	848.6	2	822.3
True	B	9	0	0	10	18	873	211	1391	1390	[834,185,901,236]	98.73	0.8718	24	23	331	0.1373	30	0.02712	13	0.03223	1	0.0008673	30	3618	1	2056
True	B	9	0	0	10	19	658	219	1329	1388	[626,190,722,264]	87.57	0.8991	25	24	214	0.1188	20	0.02039	0	0	0	0	20	3539	0	NaN
True	B	9	0	0	10	20	271	220	1211	1386	[242,192,297,251]	73.47	0.9061	26	25	230	0.1502	20	0.0243	37	0.03986	3	0.001816	20	3348	3	1859
True	B	9	0	0	10	21	385	211	1242	1386	[331,184,414,266]	120.8	0.8862	27	26	431	0.1787	37	0.02735	39	0.04176	3	0.0017	37	3648	3	1832
True	B	9	0	0	10	22	589	225	1306	1386	[560,186,619,254]	72.04	0.9627	28	27	134	0.1389	11	0.01363	26	0.006676	2	0.001112	11	2401	2	507.3
True	B	9	0	0	10	23	921	241	1405	1382	[892,205,951,282]	134.6	0.9275	29	28	452	0.1537	41	0.02719	38	0.04205	3	0.002423	41	4130	3	1465
True	B	9	0	0	10	24	985	235	1425	1383	[950,204,1020,266]	136	0.9496	30	29	382	0.1554	36	0.02362	0	0	0	0	36	4068	0	NaN
True	B	9	0	0	10	25	488	248	1276	1379	[460,217,513,278]	113.8	0.9658	31	30	363	0.1368	32	0.0251	13	0.03151	1	0.0008961	32	4475	1	2594
True	B	9	0	0	10	26	405	253	1252	1377	[369,224,454,284]	99.54	0.9393	32	31	286	0.1118	27	0.02422	22	0.02403	2	0.000998	27	3862	2	1995
True	B	9	0	0	10	27	692	250	1336	1378	[653,214,732,282]	111.8	0.9465	33	32	363	0.1432	32	0.02556	13	0.04	1	0.0005368	32	4156	1	3861
True	B	9	0	0	10	28	624	254	1317	1377	[590,229,652,275]	42.76	0.9512	34	33	43	0.06857	4	0.008351	7	0.0003254	1	0.0008489	4	1696	1	436.4
True	B	9	0	0	10	29	807	265	1371	1372	[781,238,836,308]	77.31	0.9229	36	35	246	0.1513	22	0.0254	9	0.0002726	1	0.0005102	22	4343	1	494.2
True	B	9	0	0	10	30	341	278	1232	1369	[311,248,369,311]	41.15	0.9147	37	36	81	0.142	7	0.01518	24	0.001557	2	0.000935	7	2784	2	449.1
True	B	9	0	0	10	31	750	279	1354	1369	[717,250,777,307]	81.33	0.9189	38	37	227	0.1344	19	0.02086	91	0.02755	9	0.005341	19	3020	9	1527
True	B	9	0	0	10	32	447	286	1263	1368	[413,265,473,302]	83.38	0.8124	39	38	147	0.114	14	0.01499	39	0.1044	3	0.004724	14	3367	3	2220
True	B	9	0	0	10	33	228	278	1199	1369	[199,247,260,314]	75.61	0.9005	40	39	191	0.1831	15	0.01771	13	0.006386	1	0.000445	15	3255	1	1278
True	B	9	0	0	10	34	849	290	1382	1363	[812,263,874,345]	105.3	0.8969	41	40	276	0.1693	24	0.02034	0	0	0	0	24	4200	0	NaN
True	B	9	0	0	10	35	605	292	1312	1365	[575,266,637,317]	57.58	0.9234	42	41	125	0.1021	12	0.0186	26	0.01513	2	0.001341	12	5362	2	962.4
True	B	9	0	0	10	36	932	296	1408	1365	[891,270,964,329]	92.22	0.9673	43	42	293	0.2155	24	0.02323	0	0	0	0	24	4009	0	NaN
True	B	9	0	0	10	37	858	332	1388	1355	[838,299,886,352]	91.68	0.9139	44	43	206	0.1511	18	0.01753	13	0.03614	1	0.001684	18	4970	1	1907
True	B	9	0	0	10	38	1045	346	1443	1348	[1020,320,1076,383]	99.27	0.9475	45	44	258	0.1981	21	0.01888	0	0	0	0	21	3751	0	NaN
True	B	9	0	0	10	39	888	361	1395	1345	[857,337,913,385]	80.25	0.9543	46	45	195	0.129	18	0.02002	24	0.006397	2	0.001873	18	4096	2	887.9
True	B	9	0	0	10	40	991	395	1426	1336	[941,362,1028,426]	100.5	0.9351	47	46	316	0.1419	30	0.02664	52	0.05603	4	0.002004	30	4799	4	1561
True	B	9	0	0	10	41	126	914	1167	1181	[84,879,154,940]	101.3	0.9789	49	48	253	0.1556	22	0.01938	37	0.04059	3	0.001808	22	2974	3	1739
True	B	9	0	0	10	42	384	988	1245	1157	[345,958,417,1018]	97.93	0.9803	51	50	337	0.1168	34	0.03099	13	0.001804	1	0.0007168	34	4425	1	327.5
True	B	9	0	0	10	43	253	128	1205	1412	[217,89,283,184]	151.3	0.9671	52	51	564	0.1502	50	0.0295	34	0.002156	4	0.001589	50	4003	4	527.5
True	B	9	0	0	11	1	36	454	818	994	[1,424,68,485]	135.2	0.9463	1	1	538	0.1273	52	0.03432	37	0.02893	3	0.001862	52	4657	3	1018
True	B	9	0	0	11	2	956	514	1092	976	[924,479,990,546]	103.2	0.9306	2	2	294	0.1655	24	0.02076	68	0.02728	6	0.003413	24	2333	6	756
True	B	9	0	0	11	3	620	860	991	872	[566,836,651,887]	121.7	0.7843	4	4	343	0.1658	30	0.02201	72	0.04704	6	0.004	30	4250	6	1334
True	B	9	0	0	11	4	976	289	1097	1042	[930,258,1020,332]	162.7	0.9836	5	5	437	0.1485	40	0.02194	39	0.06602	3	0.001305	40	3787	3	2363
True	B	9	0	0	11	5	509	847	962	880	[477,789,551,884]	162.4	0.9987	6	6	531	0.1578	50	0.02749	51	0.03464	4	0.001492	50	4089	4	1426
True	B	9	0	0	12	1	802	31	402	1119	[756,1,838,92]	105.8	0.9078	1	1	230	0.1304	21	0.01772	13	0.0005411	1	0.0003769	21	2549	1	333.8
True	B	9	0	0	12	2	989	262	459	1052	[959,236,1048,291]	146	0.9557	4	4	308	0.1474	27	0.0165	37	0.05887	3	0.002545	27	4023	3	1764
True	B	9	0	0	12	3	925	316	438	1034	[889,280,964,368]	135.6	0.982	5	5	326	0.1363	28	0.01843	13	0.000521	1	0.0004234	28	3247	1	377.8
True	B	9	0	0	12	4	1001	344	458	1027	[952,312,1030,376]	111.7	1.004	7	7	338	0.1703	30	0.02398	0	0	0	0	30	4135	0	NaN
True	B	9	0	0	12	5	958	410	447	1007	[922,363,986,453]	147.2	0.9519	8	8	427	0.1791	37	0.02244	24	0.01369	2	0.00101	37	3385	2	957.7
True	B	9	0	0	12	6	1054	471	476	990	[1031,453,1076,489]	98.2	0.8132	9	9	73	0.09852	6	0.005455	0	NaN	0	NaN	6	2336	0	NaN
True	B	9	0	0	12	7	844	492	414	983	[803,451,879,529]	141.6	0.9077	10	10	454	0.1355	40	0.02522	34	0.03054	3	0.001336	40	3999	3	1496
True	B	9	0	0	12	8	1008	527	463	972	[974,483,1043,573]	126.4	0.9693	11	11	321	0.1489	28	0.01977	13	0.002556	1	0.0004036	28	2971	1	500.2
True	B	9	0	0	12	9	1046	608	473	947	[1013,576,1078,659]	151.4	0.8644	12	12	384	0.134	34	0.02005	39	0.006916	3	0.001722	34	3607	3	672
True	B	9	0	0	12	10	994	625	459	942	[969,598,1019,662]	152.1	0.9701	13	13	508	0.158	46	0.027	13	0.05944	1	0.001263	46	3945	1	2950
True	B	9	0	0	12	11	837	670	412	930	[796,619,871,716]	120.2	0.8997	15	15	298	0.1652	25	0.01856	12	0.0004725	1	0.000352	25	4110	1	770.1
True	B	9	0	0	12	12	687	666	366	931	[637,633,725,698]	148.6	0.9336	16	16	290	0.1382	24	0.01441	40	0.05761	4	0.001997	24	3824	4	1882
True	B	9	0	0	12	13	654	697	357	922	[631,679,682,717]	63.65	0.7589	17	17	256	0.1693	23	0.03226	31	0.04539	3	0.006579	23	4365	3	1478
True	B	9	0	0	12	14	742	702	382	920	[703,676,772,732]	117.7	0.9303	18	18	279	0.159	24	0.0182	26	0.05843	2	0.001825	24	3210	2	1763
True	B	9	0	0	12	15	862	802	420	892	[827,758,900,838]	166	0.9404	19	19	642	0.1669	57	0.03066	26	0.0529	2	0.001066	57	4230	2	2760
True	B	9	0	0	12	16	638	805	355	890	[603,771,687,854]	125.1	0.8964	20	20	284	0.1424	25	0.01784	26	0.03339	2	0.000692	25	3184	2	2474
True	B	9	0	0	12	17	957	843	448	878	[920,791,996,882]	124.9	0.8095	21	21	451	0.1592	42	0.03002	80	0.04388	7	0.002699	42	3848	7	1128
True	B	9	0	0	12	18	814	853	403	877	[777,825,835,872]	47.94	0.8876	23	23	52	0.1582	4	0.007449	39	0.1195	3	0.003831	4	2497	3	2442
True	B	9	0	0	12	19	812	890	406	864	[784,860,859,919]	125	0.83	24	24	322	0.1422	29	0.02071	26	0.07967	2	0.002012	29	3230	2	3032
True	B	9	0	0	12	20	969	901	450	861	[933,883,993,920]	139.2	0.9294	25	25	516	0.151	48	0.03079	26	0.2232	2	0.01538	48	3989	2	2579
True	B	9	0	0	12	21	1025	913	469	857	[1003,896,1056,931]	93.38	0.9744	26	26	211	0.1711	18	0.01721	13	0.06795	1	0.003247	18	3290	1	2291
True	B	9	0	0	12	22	1060	937	480	842	[1042,915,1078,1028]	120.3	0.9165	27	27	451	0.1313	44	0.03264	13	0.0019	1	0.0006321	44	3864	1	553.4
True	B	9	0	0	12	23	1014	956	466	845	[986,935,1045,976]	113.9	0.9211	28	28	340	0.123	31	0.02429	26	0.1215	2	0.003636	31	3472	2	2541
True	B	9	0	0	12	24	987	980	456	838	[961,945,1010,1005]	89	0.958	29	29	286	0.1572	26	0.02608	10	0.001692	1	0.0011	26	3614	1	432.6
True	B	9	0	0	12	25	865	990	421	834	[837,965,899,1017]	91.15	0.9821	30	30	244	0.1528	21	0.02057	39	0.05484	3	0.002809	21	3664	3	1783
True	B	9	0	0	12	26	817	997	405	830	[770,966,854,1040]	118.9	0.981	31	31	367	0.1594	34	0.02553	0	0	0	0	34	4024	0	NaN
True	B	9	0	0	12	27	946	986	446	834	[922,958,980,1016]	76.06	0.8934	32	32	205	0.1461	18	0.02113	13	0.01612	1	0.0007825	18	2699	1	2246
True	B	9	0	0	12	28	955	1032	447	821	[933,1013,977,1062]	61.69	0.9366	33	33	199	0.1081	19	0.0275	0	0	0	0	19	3558	0	NaN
True	B	9	0	0	12	29	572	1042	332	819	[531,1009,601,1073]	130.9	0.9709	34	34	414	0.1484	37	0.02524	0	0	0	0	37	4320	0	NaN
True	B	9	0	0	12	30	872	1050	422	817	[838,1014,907,1078]	115.2	0.9274	35	35	316	0.1458	29	0.02246	25	0.01019	2	0.001026	29	3447	2	936.1
True	B	9	0	0	12	31	917	1042	437	819	[896,1015,941,1064]	82.67	0.9489	36	36	198	0.1658	17	0.01836	13	0.0438	1	0.001748	17	2460	1	1821
True	B	9	0	0	12	32	204	362	222	1021	[169,312,239,403]	189.3	0.9982	39	38	416	0.1412	35	0.01651	57	0.02506	5	0.003802	35	2701	5	833.5
True	B	9	0	0	12	33	894	385	429	1015	[856,334,927,429]	140.6	0.9763	41	40	472	0.1394	43	0.0273	26	0.03137	2	0.0007117	43	4109	2	2261
True	B	9	0	0	12	34	1013	416	463	1006	[975,369,1045,467]	229.4	0.9983	42	41	691	0.1545	62	0.02412	13	0.001341	1	0.0005903	62	3919	1	320.5
True	B	9	0	0	12	35	126	442	193	991	[23,398,172,534]	154.1	0.9772	43	42	273	0.1248	24	0.01391	13	0.0002021	1	0.0001198	24	2732	1	470.2
True	B	9	0	0	12	36	902	465	430	991	[869,438,927,497]	163.9	0.9957	44	43	535	0.1539	51	0.02778	26	0.1105	2	0.003584	51	3728	2	3075
True	B	9	0	0	12	37	954	487	447	984	[913,447,993,526]	177.4	0.9125	45	44	437	0.1506	36	0.01812	39	0.03917	3	0.001462	36	3202	3	1789
True	B	9	0	0	12	38	809	540	403	966	[776,508,847,592]	182.6	0.8882	46	45	489	0.1244	42	0.02054	13	0.03369	1	0.0005865	42	4316	1	3071
True	B	9	0	0	12	39	885	535	425	969	[835,503,934,574]	125.9	0.9944	47	46	392	0.205	33	0.0234	0	0	0	0	33	3841	0	NaN
True	B	9	0	0	12	40	781	627	395	940	[741,583,830,690]	328.6	0.9141	48	47	1095	0.1395	98	0.02662	52	0.02795	4	0.001548	98	4760	4	1349
True	B	9	0	0	12	41	961	680	449	925	[929,642,991,724]	181.9	0.999	49	48	673	0.1539	63	0.03091	13	0.04699	1	0.0007587	63	4894	1	2912
True	B	9	0	0	12	42	669	742	362	910	[639,690,704,773]	200.2	0.7508	50	49	545	0.158	49	0.02185	24	0.06362	2	0.00173	49	4322	2	2318
True	B	9	0	0	12	43	876	734	423	912	[834,683,908,770]	199.4	0.9904	51	50	619	0.1508	55	0.02462	0	0	0	0	55	3789	0	NaN
True	B	9	0	0	12	44	998	729	461	913	[957,664,1041,773]	174.5	0.968	52	51	672	0.1619	61	0.0312	21	0.00682	3	0.0009527	61	3825	3	620.3
True	B	9	0	0	12	45	924	759	439	903	[886,715,965,800]	181	0.9029	53	52	650	0.1392	60	0.0296	35	0.003086	3	0.001276	60	5019	3	351.8
True	B	9	0	0	12	46	1001	804	460	891	[958,761,1041,850]	172.9	1.002	54	53	608	0.1541	55	0.02839	26	0.04304	2	0.0008677	55	3920	2	2875
True	B	9	0	0	12	47	1030	868	470	870	[992,836,1067,903]	169	0.9968	55	54	537	0.1636	49	0.02588	13	0.002582	1	0.0008905	49	3287	1	295.8
True	B	9	0	0	12	48	771	872	392	869	[743,839,804,906]	187.2	0.9845	56	55	511	0.1471	45	0.02146	52	0.2034	4	0.01072	45	3569	4	2878
True	B	9	0	0	12	49	844	928	415	852	[809,892,890,974]	169.4	0.9443	57	56	578	0.1489	53	0.02792	82	0.01627	8	0.003199	53	3809	8	881.4
True	B	9	0	0	12	50	911	950	435	849	[875,893,958,994]	181.7	0.9604	58	57	660	0.1565	61	0.02998	78	0.04906	6	0.00216	61	4311	6	1206
True	B	9	0	0	12	51	587	962	337	840	[537,920,641,1025]	195.6	0.9581	59	58	647	0.1312	63	0.02875	83	0.02194	7	0.001662	63	4294	7	1167
True	B	9	0	0	13	1	643	48	-297	1111	[577,18,678,109]	121.2	0.9825	1	1	354	0.1505	31	0.02283	22	0.0002561	3	0.001075	31	2708	3	397.5
True	B	9	0	0	13	2	636	99	-290	1100	[602,63,705,138]	161.2	0.9396	2	2	319	0.1405	28	0.0155	0	0	0	0	28	2946	0	NaN
True	B	9	0	0	13	3	689	140	-278	1088	[657,110,723,168]	104.6	0.9108	3	3	374	0.1509	34	0.02901	50	0.03148	4	0.002674	34	3118	4	1347
True	B	9	0	0	13	4	314	248	-390	1055	[282,224,354,275]	90.88	0.9805	4	4	220	0.1598	19	0.01866	13	0.01169	1	0.0006887	19	4541	1	1402
True	B	9	0	0	13	5	1027	258	-176	1053	[997,233,1067,286]	122.7	0.8945	5	5	172	0.1298	14	0.01018	50	0.04469	4	0.004489	14	2471	4	1157
True	B	9	0	0	13	6	317	303	-389	1040	[280,265,354,337]	134.6	0.8393	6	6	260	0.1484	21	0.01393	33	0.007301	3	0.001189	21	3373	3	1198
True	B	9	0	0	13	7	1045	310	-173	1037	[1001,280,1075,357]	111.9	0.9561	7	7	317	0.1202	30	0.02394	13	0.002894	1	0.000558	30	2830	1	718.8
True	B	9	0	0	13	8	723	344	-269	1026	[692,318,752,380]	96.32	0.9407	8	8	268	0.1394	25	0.02317	0	0	0	0	25	4136	0	NaN
True	B	9	0	0	13	9	726	399	-267	1011	[698,366,756,439]	124.5	0.9101	9	9	248	0.1707	20	0.01434	49	0.01925	4	0.002801	20	3024	4	757.4
True	B	9	0	0	13	10	1049	448	-171	996	[1009,415,1078,490]	111.4	0.9826	10	10	396	0.1588	36	0.02885	13	0.001534	1	0.0005328	36	3779	1	337.2
True	B	9	0	0	13	11	961	455	-197	994	[929,423,994,492]	86.24	0.9201	11	11	277	0.1586	25	0.02588	0	0	0	0	25	3927	0	NaN
True	B	9	0	0	13	12	763	455	-256	993	[737,430,791,490]	85.88	0.9927	12	12	268	0.1538	25	0.02599	0	0	0	0	25	4142	0	NaN
True	B	9	0	0	13	13	922	497	-209	982	[889,469,962,527]	93.65	0.8704	14	13	302	0.1468	29	0.02765	13	0.01463	1	0.0006752	29	4035	1	1096
True	B	9	0	0	13	14	782	523	-250	974	[760,490,807,545]	90.34	0.8436	15	14	262	0.1763	22	0.02174	49	0.0724	4	0.005926	22	3742	4	2176
True	B	9	0	0	13	15	874	515	-224	976	[845,494,898,540]	106.7	0.9123	16	15	374	0.1527	35	0.02929	26	0.104	2	0.003356	35	5041	2	2637
True	B	9	0	0	13	16	824	505	-238	979	[800,472,849,538]	99.36	0.8343	17	16	320	0.163	30	0.02695	26	0.04719	2	0.001621	30	4796	2	2104
True	B	9	0	0	13	17	948	532	-199	971	[915,508,985,553]	126.2	0.9423	18	17	457	0.1823	42	0.0297	26	0.09054	2	0.002594	42	4034	2	2020
True	B	9	0	0	13	18	835	553	-234	965	[810,535,868,571]	85.16	0.9337	19	18	243	0.1688	22	0.02306	0	0	0	0	22	4143	0	NaN
True	B	9	0	0	13	19	808	570	-243	960	[786,540,828,604]	94	0.9573	20	19	272	0.1809	25	0.02374	39	0.08938	3	0.004886	25	4439	3	1628
True	B	9	0	0	13	20	899	611	-216	950	[868,553,925,646]	179.1	0.891	21	20	572	0.1514	52	0.02592	26	0.06539	2	0.001757	52	4477	2	2374
True	B	9	0	0	13	21	934	586	-205	956	[913,553,956,613]	84.36	0.9602	22	21	305	0.1861	28	0.02963	0	0	0	0	28	4007	0	NaN
True	B	9	0	0	13	22	854	629	-230	945	[820,568,888,664]	145.7	0.7839	23	22	416	0.1518	38	0.02328	82	0.01038	8	0.003107	38	4416	8	1229
True	B	9	0	0	13	23	973	607	-196	947	[919,564,1004,658]	132.1	0.9762	24	23	304	0.1744	26	0.01757	26	0.03137	2	0.0008467	26	3496	2	1747
True	B	9	0	0	13	24	91	635	-457	941	[61,585,122,663]	87.49	0.8891	26	25	214	0.1634	18	0.01837	21	0.0002772	3	0.001607	18	3712	3	320.4
True	B	9	0	0	13	25	40	669	-472	931	[10,619,65,694]	88.11	0.9738	29	27	288	0.1846	26	0.02634	0	0	0	0	26	3212	0	NaN
True	B	9	0	0	13	26	917	688	-211	926	[889,639,946,729]	168.2	0.8981	30	28	474	0.131	45	0.02389	55	0.04092	5	0.003514	45	3785	5	1210
True	B	9	0	0	13	27	870	676	-224	926	[843,646,893,720]	125.5	0.9478	31	29	352	0.1745	31	0.02205	0	0	0	0	31	4023	0	NaN
True	B	9	0	0	13	28	998	678	-188	928	[956,655,1030,709]	106.6	0.9031	32	30	195	0.1439	17	0.01424	0	0	0	0	17	3513	0	NaN
True	B	9	0	0	13	29	952	719	-202	914	[912,699,975,753]	108.8	0.9141	33	31	278	0.1944	23	0.01887	44	0.0326	4	0.005698	23	2808	4	758.2
True	B	9	0	0	13	30	982	743	-192	908	[937,709,1010,771]	120.9	0.8788	34	32	253	0.1261	24	0.01773	23	0.04386	2	0.001942	24	3174	2	1361
True	B	9	0	0	13	31	112	760	-450	902	[87,734,138,787]	97.48	0.9092	35	33	309	0.1262	29	0.02656	13	0.0547	1	0.000995	29	5091	1	3130
True	B	9	0	0	13	32	429	824	-356	884	[382,782,468,858]	152.6	0.9636	37	34	385	0.1736	33	0.01931	30	0.003851	3	0.001525	33	3792	3	472
True	B	9	0	0	13	33	80	825	-459	882	[40,789,148,873]	120.2	0.9079	38	35	208	0.1528	18	0.01336	13	0.01679	1	0.0002772	18	2801	1	3004
True	B	9	0	0	13	34	343	854	-380	875	[309,827,386,884]	127.7	0.9076	39	36	298	0.1764	26	0.01817	10	0.0003177	1	0.0006693	26	4058	1	482.4
True	B	9	0	0	13	35	219	884	-417	868	[129,825,312,927]	44.99	0.8669	40	37	0	0	0	0	66	0.003053	6	0.0006352	0	NaN	6	665.9
True	B	9	0	0	13	36	423	886	-357	866	[388,848,460,915]	147.5	0.961	41	38	481	0.1439	46	0.02785	0	0	0	0	46	4144	0	NaN
True	B	9	0	0	13	37	361	895	-379	864	[285,843,413,920]	68.83	0.8323	42	39	99	0.1117	8	0.01038	44	0.001571	4	0.001151	8	2224	4	422.2
True	B	9	0	0	13	38	487	922	-337	854	[452,888,534,954]	205.3	0.8152	43	40	319	0.158	27	0.01174	39	0.08665	3	0.002849	27	3007	3	2193
True	B	9	0	0	13	39	314	937	-389	850	[282,911,353,962]	113.4	0.9101	45	41	276	0.1444	24	0.0189	13	0.02882	1	0.0007018	24	3028	1	2105
True	B	9	0	0	13	40	242	936	-411	848	[205,909,287,976]	104.1	0.908	46	42	135	0.08648	12	0.01029	0	0	0	0	12	1951	0	NaN
True	B	9	0	0	13	41	585	959	-311	842	[542,930,623,994]	126.9	0.9042	47	43	363	0.1822	30	0.0211	49	0.06621	4	0.002142	30	3481	4	1648
True	B	9	0	0	13	42	448	964	-348	841	[419,934,497,997]	107.1	0.9801	48	44	295	0.1497	27	0.0225	26	0.003139	2	0.001075	27	3620	2	661.1
True	B	9	0	0	13	43	524	969	-329	840	[486,945,550,992]	133.1	0.9135	49	45	424	0.1345	41	0.0275	39	0.08794	3	0.003871	41	3893	3	2547
True	B	9	0	0	13	44	195	992	-425	833	[174,966,220,1018]	44.37	0.8348	51	46	47	0.08139	4	0.008048	43	0.01802	4	0.003398	4	2271	4	1048
True	B	9	0	0	13	45	229	1016	-415	826	[206,985,252,1048]	111.1	0.9808	52	47	351	0.153	30	0.02412	0	0	0	0	30	3573	0	NaN
True	B	9	0	0	13	46	375	1031	-372	822	[346,993,404,1064]	136.5	0.9683	53	48	404	0.1768	36	0.02354	38	0.03134	3	0.002309	36	3610	3	1489
True	B	9	0	0	13	47	251	1058	-411	813	[208,1037,273,1078]	67.49	0.9264	56	50	159	0.129	14	0.01852	0	0	0	0	14	3895	0	NaN
True	B	9	0	0	13	48	781	392	-252	1011	[741,356,819,440]	158.1	0.9595	57	51	552	0.1761	49	0.02767	13	0.02856	1	0.0004632	49	3729	1	3645
True	B	9	0	0	13	49	816	439	-240	998	[779,394,857,481]	186	0.9883	58	52	444	0.1572	39	0.01872	20	0.0007128	2	0.001006	39	3708	2	499.5
True	B	9	0	0	13	50	1000	489	-185	985	[971,442,1035,525]	194.8	0.9629	59	53	603	0.1743	53	0.02429	58	0.1137	5	0.005118	53	3984	5	1883
True	B	9	0	0	13	51	1052	703	-171	920	[1020,674,1078,729]	158.1	0.9754	60	54	562	0.1603	52	0.02936	13	0.01028	1	0.001242	52	3873	1	960.6
True	B	9	0	0	13	52	328	1007	-385	829	[295,969,381,1053]	159.5	0.9804	61	55	475	0.1757	40	0.02238	0	0	0	0	40	3121	0	NaN
True	B	9	0	0	14	1	764	640	-902	938	[731,608,798,671]	101.6	0.9702	2	1	263	0.1378	24	0.02109	0	0	0	0	24	4532	0	NaN
True	B	9	0	0	14	2	849	824	-876	883	[818,802,880,852]	113.7	0.9561	3	2	283	0.1546	25	0.01962	26	0.03739	2	0.002375	25	3898	2	1342
True	B	9	0	0	14	3	858	867	-875	871	[818,839,887,894]	124.4	0.9427	4	3	349	0.1974	30	0.02154	51	0.09447	4	0.003478	30	3167	4	1770
True	B	9	0	0	15	1	270	49	-1373	793	[237,1,306,85]	108.6	0.9132	4	4	280	0.1327	24	0.01972	25	0.004835	2	0.0007619	24	2715	2	1285
True	B	9	0	0	15	2	526	43	-1295	793	[504,26,555,60]	43.39	0.8002	5	5	55	0.1264	5	0.01029	51	0.06435	5	0.01042	5	3221	5	1955
True	B	9	0	0	15	3	329	64	-1355	788	[304,23,356,96]	85.7	0.8176	6	6	182	0.1115	17	0.01771	57	0.01629	5	0.003043	17	3366	5	843.4
True	B	9	0	0	15	4	381	64	-1340	788	[349,32,409,100]	119.1	0.9632	7	7	252	0.1085	23	0.01724	0	0	0	0	23	4001	0	NaN
True	B	9	0	0	15	5	562	81	-1285	783	[533,38,591,116]	63.29	0.9032	8	8	176	0.1154	17	0.02398	44	0.03965	4	0.002251	17	4787	4	2016
True	B	9	0	0	15	6	607	101	-1272	776	[583,74,635,129]	83.83	0.8952	9	9	256	0.1278	24	0.02556	52	0.09088	4	0.003466	24	3808	4	2644
True	B	9	0	0	15	7	449	102	-1319	776	[404,66,481,131]	92.84	0.9711	10	10	252	0.1493	23	0.02212	13	0.0008246	1	0.0004845	23	4522	1	502.2
True	B	9	0	0	15	8	546	125	-1290	770	[522,98,568,146]	45.8	0.9597	11	11	100	0.1287	9	0.01754	13	0.01732	1	0.001046	9	3940	1	1733
True	B	9	0	0	15	9	221	126	-1389	779	[193,1,246,166]	72.93	0.9462	12	12	214	0.1389	18	0.02203	13	0.0002199	1	0.0002133	18	3227	1	408
True	B	9	0	0	15	10	463	147	-1316	763	[422,125,485,188]	99.63	0.8435	13	13	222	0.1408	21	0.01882	31	0.05944	3	0.004525	21	4176	3	1508
True	B	9	0	0	15	11	296	146	-1363	762	[263,115,343,179]	135.8	0.8933	14	14	352	0.1519	32	0.02104	21	0.001102	2	0.0008822	32	3746	2	648.5
True	B	9	0	0	15	12	378	165	-1341	756	[347,135,409,215]	122.2	0.8844	15	15	409	0.1647	36	0.0263	0	0	0	0	36	3917	0	NaN
True	B	9	0	0	15	13	433	172	-1323	754	[400,140,468,210]	105.6	0.8982	16	16	238	0.1408	21	0.01775	0	0	0	0	21	3576	0	NaN
True	B	9	0	0	15	14	305	201	-1362	747	[272,175,345,228]	106.7	0.8387	17	17	279	0.1269	26	0.02176	36	0.02581	3	0.001813	26	4975	3	1659
True	B	9	0	0	15	15	548	193	-1289	748	[523,166,573,230]	72.85	0.8708	18	18	110	0.1006	9	0.01103	45	0.02067	4	0.002833	9	2122	4	843.6
True	B	9	0	0	15	16	223	193	-1387	749	[195,160,251,237]	62.85	0.9724	19	19	137	0.1014	13	0.01847	0	0	0	0	13	3452	0	NaN
True	B	9	0	0	15	17	258	228	-1376	741	[234,179,285,256]	114.8	0.8917	20	20	257	0.1458	23	0.01788	0	0	0	0	23	3187	0	NaN
True	B	9	0	0	15	18	523	236	-1298	735	[494,211,547,270]	52.49	0.8738	21	21	32	0.001771	4	0.006803	24	0.002859	2	0.001241	4	432	2	625.3
True	B	9	0	0	15	19	215	249	-1390	725	[194,209,238,326]	51.15	0.8263	22	22	107	0.09572	9	0.01571	13	0.01294	1	0.0003154	9	2086	1	3367
True	B	9	0	0	15	20	437	260	-1323	728	[397,220,473,314]	163.4	0.9104	23	23	466	0.164	43	0.0235	39	0.008209	3	0.0008905	43	4343	3	585.1
True	B	9	0	0	15	21	332	244	-1354	733	[303,219,366,277]	107.5	0.8658	24	24	208	0.127	17	0.01412	93	0.03002	8	0.006601	17	3745	8	1263
True	B	9	0	0	15	22	255	281	-1377	724	[222,253,291,314]	85.97	0.9086	25	25	151	0.04351	13	0.0135	22	0.0007524	2	0.001242	13	1620	2	412.6
True	B	9	0	0	15	23	293	304	-1365	716	[254,271,340,335]	130.1	0.9675	26	26	321	0.1602	28	0.01922	20	0.008701	2	0.001218	28	3964	2	669.5
True	B	9	0	0	15	24	416	332	-1329	707	[384,300,456,370]	122.6	0.9611	27	27	338	0.1258	33	0.02404	13	0.0007266	1	0.0005565	33	4749	1	322.4
True	B	9	0	0	15	25	248	332	-1384	706	[192,310,276,359]	56.15	0.7996	28	28	39	0.06458	3	0.004769	10	0.0004616	1	0.0005208	3	2090	1	546.6
True	B	9	0	0	15	26	547	345	-1292	704	[482,313,588,379]	79.72	0.8415	29	29	185	0.1253	16	0.01792	26	0.02113	2	0.0004882	16	4134	2	2841
True	B	9	0	0	15	27	322	339	-1357	704	[289,298,356,397]	134.9	0.9617	30	30	382	0.1815	33	0.02184	0	0	0	0	33	4318	0	NaN
True	B	9	0	0	15	28	354	383	-1347	692	[324,348,384,412]	87.84	0.9507	31	31	225	0.1188	20	0.02033	60	0.02516	5	0.003285	20	4980	5	1014
True	B	9	0	0	15	29	517	404	-1301	688	[457,359,556,443]	66.51	0.7795	32	32	99	0.03846	8	0.01074	11	0.0002926	1	0.0002098	8	2092	1	335.2
True	B	9	0	0	15	30	328	449	-1355	672	[298,423,351,474]	108.6	0.9584	33	33	366	0.1663	33	0.02714	55	0.04887	5	0.006337	33	4876	5	1998
True	B	9	0	0	15	31	227	456	-1387	665	[181,405,260,550]	59.37	0.8072	34	34	77	0.1284	6	0.009023	24	0.0002552	2	0.0002822	6	3501	2	468.1
True	B	9	0	0	15	32	419	470	-1332	665	[342,427,463,520]	91.68	0.9641	35	35	225	0.1766	19	0.0185	117	0.01935	12	0.001896	19	4768	12	1255
True	B	9	0	0	15	33	291	493	-1364	659	[254,461,346,531]	145.9	0.9312	36	36	309	0.1203	27	0.01652	98	0.006291	10	0.004301	27	5211	10	419.9
True	B	9	0	0	15	34	346	508	-1349	654	[320,490,373,526]	44.9	0.9056	37	37	23	0.05789	2	0.003976	10	0.0009892	1	0.001325	2	2259	1	581.1
True	B	9	0	0	15	35	435	548	-1323	643	[390,483,481,602]	98.11	0.8359	38	38	292	0.149	26	0.02366	18	0.002111	2	0.000347	26	5310	2	2596
True	B	9	0	0	15	36	458	601	-1317	626	[412,575,488,628]	106.8	0.9782	39	39	306	0.1526	29	0.02425	13	0.007744	1	0.0008058	29	4836	1	813.5
True	B	9	0	0	15	37	308	602	-1363	629	[273,550,338,630]	50.71	0.7606	40	40	21	0.0008672	3	0.005282	10	0.0004731	1	0.0004843	3	459.9	1	413.1
True	B	9	0	0	15	38	366	617	-1343	622	[340,588,392,651]	56.24	0.9106	41	41	62	0.03179	5	0.007937	43	0.001695	5	0.002749	5	1303	5	507.8
True	B	9	0	0	15	39	255	624	-1380	619	[197,579,297,682]	112.3	0.9222	42	42	307	0.1407	29	0.02305	122	0.01492	11	0.002339	29	5156	11	1244
True	B	9	0	0	15	40	454	648	-1317	614	[429,624,489,669]	137.8	0.879	43	43	318	0.1259	31	0.02008	18	0.005642	2	0.008889	31	5128	2	500.4
True	B	9	0	0	15	41	342	659	-1351	610	[313,626,369,692]	106.6	1.008	44	44	220	0.1616	19	0.01591	13	0.03135	1	0.0009174	19	4448	1	2147
True	B	9	0	0	15	42	294	650	-1366	610	[257,630,317,694]	131.9	0.9408	45	45	255	0.1419	22	0.0149	28	0.05793	3	0.004471	22	4699	3	4396
True	B	9	0	0	15	43	422	679	-1324	604	[397,653,471,702]	96.32	0.9121	46	46	281	0.1556	24	0.02224	10	0.001659	1	0.0007294	24	4901	1	1082
True	B	9	0	0	15	44	375	686	-1342	601	[332,658,407,717]	107.4	0.9158	47	47	247	0.1119	24	0.01995	26	0.0179	2	0.001325	24	5252	2	911.9
True	B	9	0	0	15	45	255	718	-1376	593	[223,682,292,750]	110.9	0.9068	48	48	227	0.1581	20	0.0161	12	0.0003609	1	0.0005596	20	4531	1	361
True	B	9	0	0	15	46	418	722	-1324	592	[388,694,476,744]	109.4	0.8667	49	49	273	0.1171	26	0.02122	13	0.004368	1	0.0005956	26	4893	1	556.6
True	B	9	0	0	15	47	221	756	-1388	581	[190,693,269,813]	51.6	0.8532	50	50	63	0.03804	5	0.008651	0	0	0	0	5	1556	0	NaN
True	B	9	0	0	15	48	277	820	-1370	562	[249,772,312,857]	98.82	0.975	51	51	213	0.1436	19	0.01716	13	0.008556	1	0.0005624	19	3959	1	766.5
True	B	9	0	0	15	49	222	817	-1385	562	[193,787,253,851]	105.2	0.9599	52	52	236	0.08652	22	0.01868	25	0.02673	2	0.001376	22	2578	2	1746
True	B	9	0	0	15	50	302	862	-1361	549	[268,830,342,897]	105.6	1.003	53	53	280	0.1373	25	0.02113	24	0.03263	2	0.001043	25	4997	2	2191
True	B	9	0	0	15	51	213	869	-1389	546	[187,839,245,911]	61.33	0.8644	54	54	58	0.04091	6	0.008734	13	0.004107	1	0.0004342	6	1587	1	1228
True	B	9	0	0	15	52	224	935	-1385	529	[181,856,265,987]	146.8	0.805	55	55	161	0.07932	13	0.007908	0	0	0	0	13	1896	0	NaN
True	B	9	0	0	15	53	341	914	-1355	528	[285,891,372,982]	119	0.8268	56	56	352	0.1331	35	0.02626	65	0.03753	5	0.001893	35	4514	5	1787
True	B	9	0	0	15	54	248	986	-1378	512	[226,964,271,1010]	82.75	0.9181	57	57	122	0.1077	12	0.01295	39	0.05338	3	0.004087	12	3884	3	1696
True	B	9	0	0	15	55	264	1028	-1374	499	[238,1002,293,1065]	77.58	0.9356	58	58	216	0.1178	22	0.02532	0	0	0	0	22	4933	0	NaN
True	B	9	0	0	15	56	212	1024	-1389	498	[182,985,244,1078]	77.49	0.9922	59	59	147	0.0982	13	0.01498	10	0.0001328	1	0.0002899	13	2844	1	362.9
True	B	9	0	0	15	57	426	1051	-1325	493	[396,1023,455,1078]	81.59	0.9636	60	60	332	0.1186	33	0.03611	13	0.004306	1	0.0007375	33	6016	1	534
True	B	9	0	0	15	58	495	196	-1305	748	[459,160,532,244]	152.8	0.9727	62	62	391	0.1265	37	0.02161	48	0.02963	4	0.002262	37	4889	4	1143
True	B	9	0	0	15	59	247	386	-1381	694	[185,334,292,419]	142.8	1.003	63	63	333	0.1255	29	0.01813	101	0.002401	10	0.002613	29	3717	10	446.9
True	B	9	0	0	15	60	279	426	-1369	680	[245,379,313,468]	167.4	0.8956	64	64	458	0.1538	40	0.02133	10	0.0003107	1	0.0005219	40	4282	1	334.5
True	B	9	0	0	15	61	341	555	-1347	641	[292,516,405,602]	198.7	0.9598	65	65	521	0.1564	49	0.02201	48	0.00477	4	0.001005	49	4831	4	1016
True	B	9	0	0	15	62	309	753	-1361	581	[266,720,344,794]	124.6	0.9982	66	66	397	0.1251	38	0.02722	10	0.0004452	1	0.0003614	38	5093	1	715.6
True	B	9	0	0	15	63	284	912	-1369	536	[250,859,321,947]	163.6	0.9184	67	67	369	0.1382	33	0.018	13	0.005301	1	0.0005841	33	5143	1	771.4
True	B	9	0	0	16	1	769	32	-579	797	[716,1,798,79]	82.58	0.7686	1	1	0	0	0	0	0	0	0	0	0	NaN	0	NaN
True	B	9	0	0	16	2	728	55	-590	791	[699,25,756,81]	116.2	0.8513	2	2	346	0.1604	30	0.02304	0	0	0	0	30	3575	0	NaN
True	B	9	0	0	16	3	638	63	-616	787	[611,41,663,95]	113.2	0.8455	3	3	355	0.1353	32	0.02524	13	0.07701	1	0.001764	32	4394	1	3252
True	B	9	0	0	16	4	681	68	-603	786	[652,40,708,105]	107.2	0.8726	4	4	293	0.1476	26	0.02165	37	0.02401	3	0.002273	26	3320	3	1076
True	B	9	0	0	16	5	601	74	-627	784	[579,47,630,108]	106.1	0.955	5	5	329	0.1292	33	0.02778	0	0	0	0	33	4241	0	NaN
True	B	9	0	0	16	6	724	103	-591	777	[686,76,759,127]	149.4	0.8781	6	6	349	0.1825	29	0.01732	0	0	0	0	29	3262	0	NaN
True	B	9	0	0	16	7	783	97	-573	776	[737,60,824,134]	118.4	0.8605	7	7	366	0.1642	31	0.02338	25	0.01683	2	0.0007937	31	3915	2	2409
True	B	9	0	0	16	8	301	169	-718	756	[279,149,319,187]	72.31	0.7454	8	8	39	0.07069	3	0.003704	13	0.1637	1	0.02041	3	1356	1	2890
True	B	9	0	0	16	9	266	189	-728	752	[238,134,288,214]	99.45	0.9199	9	9	271	0.1184	25	0.02244	37	0.06983	3	0.003371	25	3936	3	2506
True	B	9	0	0	16	10	477	287	-665	722	[450,248,513,325]	118.3	0.8911	10	10	221	0.1436	19	0.01434	32	0.01266	3	0.001972	19	3488	3	708.3
True	B	9	0	0	16	11	384	717	-691	592	[359,698,413,744]	90.97	0.8556	11	11	276	0.1656	25	0.02453	13	0.07908	1	0.001748	25	4354	1	2738
True	B	9	0	0	16	12	367	749	-696	583	[341,725,399,781]	121.3	0.9554	12	12	272	0.1759	24	0.01766	11	0.003518	1	0.001553	24	3057	1	359.2
True	B	9	0	0	16	13	184	765	-752	575	[156,738,211,812]	95.07	0.9051	13	13	249	0.1685	22	0.02066	13	0.001975	1	0.0005959	22	3184	1	384.5
True	B	9	0	0	16	14	330	762	-708	579	[305,727,368,787]	108	0.8847	14	14	388	0.1474	37	0.03058	25	0.01532	2	0.002581	37	3743	2	971.9
True	B	9	0	0	16	15	242	779	-734	574	[206,734,279,821]	172.3	0.946	15	15	518	0.1723	45	0.02332	26	0.001343	2	0.000962	45	3404	2	364.9
True	B	9	0	0	16	16	359	796	-699	568	[330,773,407,823]	124.2	0.8134	16	16	152	0.09542	13	0.009346	49	0.05541	4	0.004866	13	3201	4	1101
True	B	9	0	0	16	17	387	832	-690	558	[366,810,419,856]	78.92	0.913	17	17	283	0.1567	25	0.02828	0	0	0	0	25	3619	0	NaN
True	B	9	0	0	16	18	452	831	-672	555	[422,786,480,890]	105.1	0.8956	18	18	339	0.1284	31	0.02634	13	0.004261	1	0.0004808	31	4354	1	537.8
True	B	9	0	0	16	19	257	848	-730	553	[225,814,298,887]	136	0.9661	19	19	367	0.1379	33	0.02167	0	0	0	0	33	4860	0	NaN
True	B	9	0	0	16	20	357	852	-702	549	[321,827,378,900]	73.92	0.8988	20	20	204	0.1614	18	0.02174	0	0	0	0	18	4542	0	NaN
True	B	9	0	0	16	21	211	865	-744	549	[180,824,251,899]	101	0.9769	21	21	270	0.117	25	0.0221	0	0	0	0	25	3857	0	NaN
True	B	9	0	0	16	22	410	870	-686	548	[360,820,436,896]	186.1	0.7844	22	22	584	0.1523	54	0.0259	13	0.06048	1	0.0009174	54	3992	1	4351
True	B	9	0	0	16	23	300	900	-715	538	[269,875,340,926]	145.4	0.9374	23	23	513	0.1415	47	0.02885	13	0.04696	1	0.0008857	47	4133	1	3193
True	B	9	0	0	16	24	427	911	-679	535	[393,888,455,933]	88.2	0.9029	24	24	246	0.1407	24	0.02429	13	0.02589	1	0.001116	24	4572	1	1595
True	B	9	0	0	16	25	622	952	-622	523	[582,924,653,983]	97.48	0.9185	25	25	250	0.1889	22	0.02015	0	0	0	0	22	3909	0	NaN
True	B	9	0	0	16	26	589	988	-631	511	[553,957,625,1029]	133.5	0.9474	26	26	402	0.1523	36	0.02408	13	0.003642	1	0.0005438	36	3839	1	681.2
True	B	9	0	0	16	27	657	118	-611	772	[621,91,700,146]	141.4	0.9881	27	27	492	0.1407	46	0.02904	0	0	0	0	46	3950	0	NaN
True	B	9	0	0	16	28	300	804	-718	568	[264,749,333,846]	219.3	0.8972	28	28	586	0.1474	53	0.02158	0	0	0	0	53	3642	0	NaN
True	B	9	0	0	16	29	508	838	-655	556	[475,805,544,870]	130	0.9498	29	29	297	0.1567	26	0.01786	39	0.007935	3	0.001722	26	3890	3	548.8
True	B	9	0	0	16	30	550	895	-643	539	[505,856,591,932]	171.8	0.9824	30	30	566	0.1501	52	0.02701	50	0.01421	4	0.001757	52	4169	4	651.4
True	B	9	0	0	17	1	145	74	-118	783	[115,43,174,122]	126.7	0.8163	4	4	292	0.1322	26	0.01832	0	0	0	0	26	2273	0	NaN
True	B	9	0	0	17	2	997	428	141	678	[978,408,1048,458]	97.84	0.8672	5	5	98	0.07223	9	0.008212	0	0	0	0	9	2301	0	NaN
True	B	9	0	0	17	3	963	450	126	674	[934,407,990,485]	126.9	0.945	6	6	364	0.1431	33	0.02322	0	0	0	0	33	3825	0	NaN
True	B	9	0	0	17	4	1002	476	138	665	[972,446,1033,508]	159.8	0.9274	7	7	533	0.1277	49	0.02737	0	0	0	0	49	4264	0	NaN
True	B	9	0	0	17	5	1043	481	151	664	[1023,450,1064,508]	66.42	0.9293	8	8	167	0.1103	15	0.02016	10	0.0003548	1	0.001151	15	3401	1	308.8
True	B	9	0	0	17	6	1029	513	146	654	[988,484,1052,542]	102.5	0.8911	9	9	215	0.1062	20	0.01742	0	0	0	0	20	2540	0	NaN
True	B	9	0	0	17	7	1003	545	138	645	[973,511,1039,571]	115.9	0.9758	10	10	331	0.1518	30	0.02311	13	0.001344	1	0.0008606	30	2403	1	303.1
True	B	9	0	0	17	8	951	596	124	628	[925,561,982,639]	112.2	0.8194	11	11	326	0.1605	30	0.02387	26	0.0238	2	0.000995	30	2812	2	1690
True	B	9	0	0	17	9	1005	604	139	624	[976,570,1034,655]	132.9	0.9452	12	12	449	0.1607	43	0.02888	26	0.03648	2	0.001017	43	3613	2	2209
True	B	9	0	0	17	10	958	659	125	610	[929,633,991,688]	94.36	0.9594	13	13	352	0.1284	34	0.03217	13	0.01513	1	0.000771	34	4520	1	1046
True	B	9	0	0	17	11	734	682	59	601	[694,648,773,741]	176.9	0.8135	14	14	497	0.154	44	0.0222	0	0	0	0	44	3888	0	NaN
True	B	9	0	0	17	12	782	708	72	594	[756,685,815,741]	80.7	0.9357	15	15	117	0.1177	11	0.01217	0	0	0	0	11	3652	0	NaN
True	B	9	0	0	17	13	647	718	31	588	[609,693,670,785]	85.16	0.9134	16	16	188	0.1182	18	0.01887	0	0	0	0	18	2998	0	NaN
True	B	9	0	0	17	14	709	715	52	591	[690,697,736,749]	105.9	0.8662	17	17	206	0.1324	18	0.01518	24	0.01186	2	0.005208	18	3288	2	645.9
True	B	9	0	0	17	15	683	732	42	587	[662,698,701,771]	108.5	0.8319	18	18	400	0.1494	35	0.02881	0	0	0	0	35	4542	0	NaN
True	B	9	0	0	17	16	798	742	76	585	[760,722,821,762]	82.58	0.897	19	19	249	0.1586	24	0.02595	13	0.0404	1	0.001359	24	4224	1	2439
True	B	9	0	0	17	17	843	763	91	579	[812,722,879,800]	139	0.9614	20	20	386	0.1566	33	0.02119	11	0.0003526	1	0.0005528	33	3641	1	269
True	B	9	0	0	17	18	710	764	53	580	[685,734,749,786]	68.56	0.8028	21	21	129	0.09787	12	0.01563	25	0.04225	2	0.00243	12	5043	2	1415
True	B	9	0	0	17	19	738	782	59	573	[708,748,760,812]	130.2	0.9771	22	22	444	0.123	44	0.03016	26	0.0858	2	0.003984	44	4272	2	1989
True	B	9	0	0	17	20	781	806	72	565	[736,776,816,838]	133.4	0.8991	23	23	319	0.1531	29	0.01941	0	0	0	0	29	3805	0	NaN
True	B	9	0	0	18	1	105	48	517	792	[77,23,144,82]	153.8	0.9292	3	3	473	0.09574	44	0.02554	13	0.005765	1	0.001066	44	4019	1	912.1
True	B	9	0	0	18	2	59	52	502	790	[33,32,83,79]	85.97	0.9493	4	4	225	0.1487	20	0.02077	26	0.04175	2	0.002786	20	1899	2	1348
True	B	9	0	0	18	3	21	60	490	787	[1,37,44,105]	104.3	0.9749	5	5	352	0.1198	34	0.02911	26	0.0734	2	0.002561	34	4047	2	2413
True	B	9	0	0	18	4	124	85	520	782	[82,60,152,108]	53.92	0.9002	6	6	91	0.09538	8	0.01325	51	0.009067	4	0.00243	8	4659	4	591.3
True	B	9	0	0	18	5	151	121	528	769	[112,96,180,152]	112.6	0.9413	7	7	374	0.124	35	0.02776	0	0	0	0	35	4016	0	NaN
True	B	9	0	0	18	6	70	127	504	769	[25,95,106,157]	141.2	0.9787	8	8	483	0.124	46	0.02908	52	0.0585	4	0.002604	46	4198	4	1703
True	B	9	0	0	18	7	456	155	620	761	[425,127,493,188]	120.5	0.9257	9	9	494	0.1257	47	0.03481	52	0.04232	4	0.002736	47	5148	4	1343
True	B	9	0	0	18	8	543	167	647	756	[501,138,586,205]	119.6	0.9302	10	10	433	0.1429	41	0.0306	26	0.02769	2	0.0008741	41	5137	2	2096
True	B	9	0	0	18	9	464	201	623	746	[440,177,491,230]	114.4	0.9779	11	11	432	0.1244	40	0.03123	24	0.06622	2	0.00289	40	4862	2	2053
True	B	9	0	0	18	10	178	528	537	648	[142,498,208,569]	106.3	0.9194	13	13	465	0.1333	44	0.03694	64	0.0912	5	0.002828	44	4450	5	2459
True	B	9	0	0	18	11	337	544	584	644	[299,517,364,579]	115.8	0.9387	14	14	452	0.1346	44	0.03392	50	0.07664	4	0.003265	44	5158	4	2472
True	B	9	0	0	18	12	384	561	598	639	[355,536,406,587]	111.4	0.9356	15	15	413	0.1289	39	0.03125	13	0.09738	1	0.001799	39	6055	1	3960
True	B	9	0	0	18	13	73	616	508	626	[37,553,116,658]	160.3	0.9292	16	16	315	0.1142	28	0.01559	0	0	0	0	28	3379	0	NaN
True	B	9	0	0	18	14	348	588	588	629	[330,570,368,624]	58.74	0.8638	17	17	157	0.1586	13	0.01976	0	0	0	0	13	3976	0	NaN
True	B	9	0	0	18	15	427	600	612	628	[396,565,459,632]	111.9	0.9751	18	18	474	0.1037	49	0.03911	13	0.01029	1	0.0006748	49	5633	1	844.8
True	B	9	0	0	18	16	616	607	668	625	[572,578,644,651]	127.6	0.8687	19	19	520	0.1724	47	0.03289	39	0.05561	3	0.001853	47	5155	3	2080
True	B	9	0	0	18	17	480	609	627	625	[449,586,506,633]	116.1	0.9771	20	20	384	0.1287	38	0.02921	26	0.133	2	0.003273	38	5246	2	3115
True	B	9	0	0	18	18	310	616	577	622	[272,584,344,649]	127.6	0.9396	21	21	390	0.1226	37	0.02589	84	0.01241	8	0.004296	37	5158	8	1031
True	B	9	0	0	18	19	249	623	560	620	[222,592,281,654]	132.9	0.9621	22	22	501	0.1484	46	0.03089	0	0	0	0	46	4653	0	NaN
True	B	9	0	0	18	20	686	635	689	618	[651,589,726,672]	142.5	0.9421	23	23	509	0.1181	53	0.03321	0	0	0	0	53	5997	0	NaN
True	B	9	0	0	18	21	172	717	536	593	[143,682,198,746]	94.98	0.9841	24	24	393	0.1551	35	0.03289	48	0.05978	4	0.00295	35	4307	4	2662
True	B	9	0	0	18	22	473	767	626	576	[445,725,498,807]	89.09	0.8623	25	25	245	0.1233	23	0.02305	26	0.008088	2	0.001182	23	5697	2	518.7
True	B	9	0	0	18	23	633	863	675	549	[606,828,664,896]	100.1	0.9822	26	26	281	0.1447	25	0.0223	51	0.08549	4	0.002918	25	4142	4	2474
True	B	9	0	0	18	24	818	871	730	546	[785,851,850,896]	77.13	0.9546	27	27	280	0.1058	28	0.03241	37	0.02275	3	0.002604	28	4816	3	857.5
True	B	9	0	0	18	25	966	898	772	539	[933,859,998,933]	113.3	0.9096	28	28	379	0.1437	32	0.02522	25	0.004512	2	0.001082	32	3648	2	398.6
True	B	9	0	0	18	26	762	913	712	532	[731,886,788,961]	140.8	0.9684	29	29	597	0.1178	58	0.03678	78	0.08204	6	0.004199	58	5299	6	1718
True	B	9	0	0	18	27	859	945	741	526	[829,913,879,972]	122.7	0.879	30	30	435	0.147	40	0.02909	13	0.08407	1	0.002062	40	4396	1	5879
True	B	9	0	0	18	28	981	944	780	525	[954,920,1020,969]	139.4	0.9069	31	31	471	0.1331	45	0.02883	59	0.1389	5	0.007553	45	3855	5	1885
True	B	9	0	0	18	29	903	956	756	521	[879,928,944,980]	129.2	0.9135	32	32	445	0.144	41	0.02833	24	0.01279	2	0.003135	41	3127	2	891.2
True	B	9	0	0	18	30	948	960	769	520	[931,942,970,978]	85.08	0.8934	33	33	92	0.08797	8	0.008395	0	NaN	0	NaN	8	2327	0	NaN
True	B	9	0	0	18	31	1007	997	787	507	[977,970,1040,1044]	127.3	0.9384	34	34	343	0.157	29	0.02034	13	0.0018	1	0.000609	29	2939	1	457.8
True	B	9	0	0	18	32	897	994	757	510	[877,975,942,1012]	72.49	0.8885	36	36	251	0.117	22	0.02709	47	0.04679	4	0.004119	22	4484	4	1723
True	B	9	0	0	18	33	994	1051	782	493	[966,1024,1026,1078]	101.6	0.9603	37	37	352	0.15	32	0.02812	13	0.00854	1	0.0009083	32	3185	1	1124
True	B	9	0	0	18	34	451	269	620	727	[412,235,490,306]	180.4	0.9865	40	40	573	0.1593	50	0.02474	39	0.02628	3	0.001465	50	4309	3	1401
True	B	9	0	0	18	35	33	574	493	628	[1,540,68,669]	140.6	1.003	42	42	276	0.08644	25	0.01587	21	0.0008073	2	0.0004494	25	2709	2	569.2
True	B	9	0	0	18	36	272	572	568	636	[232,542,321,604]	187.6	0.9566	43	43	718	0.1283	69	0.03283	13	0.001515	1	0.000731	69	4834	1	306.2
True	B	9	0	0	18	37	528	581	644	633	[495,548,574,616]	194	0.9971	44	44	660	0.1516	65	0.02991	52	0.08796	4	0.002349	65	4329	4	2736
True	B	9	0	0	18	38	197	592	543	628	[161,553,232,641]	158.8	0.9097	45	45	571	0.1554	51	0.02867	26	0.02191	2	0.000768	51	3981	2	1562
True	B	9	0	0	18	39	133	595	525	627	[100,567,167,635]	171.8	0.9743	46	46	552	0.124	53	0.02755	49	0.02469	5	0.003564	53	3972	5	1049
True	B	9	0	0	18	40	162	662	531	610	[107,622,193,694]	152.8	0.9646	47	47	525	0.1493	50	0.02921	53	0.01005	5	0.002559	50	4618	5	638.4
True	B	9	0	0	18	41	111	702	518	598	[75,668,149,736]	172.3	0.9316	48	48	645	0.1671	59	0.03057	13	0.03033	1	0.0005714	59	4200	1	3197
True	B	9	0	0	18	42	797	959	726	526	[761,888,850,997]	347.5	0.807	49	49	1083	0.1379	99	0.02543	26	0.03731	2	0.001123	99	4421	2	2504
True	B	9	0	0	18	43	838	1001	736	508	[798,962,882,1037]	191.9	0.8889	50	50	570	0.1489	51	0.02372	65	0.04287	5	0.002765	51	3712	5	1393
True	B	9	0	0	19	1	822	49	1376	791	[787,9,861,100]	140.8	0.9518	1	1	293	0.1304	25	0.01585	25	0.00118	2	0.0006583	25	3759	2	304.8
True	B	9	0	0	19	2	923	96	1406	779	[864,57,967,145]	109.1	0.9516	2	2	207	0.1199	17	0.01391	0	0	0	0	17	1312	0	NaN
True	B	9	0	0	19	3	404	183	1250	752	[359,147,438,225]	139.6	0.9233	3	3	405	0.1429	37	0.02366	39	0.0347	3	0.001336	37	4575	3	1479
True	B	9	0	0	19	4	462	227	1271	739	[423,178,521,270]	141.8	0.916	4	4	317	0.1412	27	0.017	48	0.0501	4	0.00123	27	4399	4	2692
True	B	9	0	0	19	5	430	295	1258	718	[383,259,467,338]	155.4	0.9273	5	5	513	0.147	47	0.027	13	0.003517	1	0.0003946	47	5167	1	1055
True	B	9	0	0	19	6	494	361	1279	699	[466,333,530,389]	108	0.9652	6	6	405	0.1899	36	0.02975	13	0.009949	1	0.000771	36	4562	1	914.9
True	B	9	0	0	19	7	484	595	1274	628	[440,559,520,642]	142.9	0.9769	7	7	357	0.1389	31	0.01936	13	0.0226	1	0.0003275	31	2427	1	3687
True	B	9	0	0	19	8	762	673	1359	606	[731,646,798,701]	114.4	0.9062	8	8	309	0.1315	29	0.02264	13	0.004139	1	0.000774	29	5556	1	739.9
True	B	9	0	0	19	9	690	681	1338	605	[653,646,736,712]	140.2	0.966	9	9	370	0.1305	34	0.02166	26	0.007843	2	0.0008453	34	4460	2	577.1
True	B	9	0	0	19	10	793	720	1367	591	[754,693,834,750]	150.3	0.917	10	10	327	0.1539	28	0.01663	0	0	0	0	28	4301	0	NaN
True	B	9	0	0	19	11	1018	995	1429	508	[925,909,1074,1073]	104.5	0.8929	11	11	169	0.1316	14	0.01196	12	0.0001185	1	9.824e-05	14	2503	1	374.4
True	B	9	0	0	19	12	821	688	1376	601	[797,665,853,719]	142	0.9734	12	12	461	0.1708	41	0.02577	39	0.1668	3	0.008499	41	4265	3	3540
True	B	9	0	0	19	13	207	877	1194	543	[176,827,255,928]	154.4	0.9544	13	13	421	0.1558	36	0.02081	0	0	0	0	36	3776	0	NaN
True	B	9	0	0	19	14	114	896	1165	536	[72,855,160,967]	143.3	0.9372	15	15	208	0.1294	16	0.009969	0	0	0	0	16	1699	0	NaN
True	B	9	0	0	20	1	176	27	862	474	[163,11,203,52]	87.04	0.7224	4	2	100	0.09463	8	0.008205	0	NaN	0	NaN	8	1780	0	NaN
True	B	9	0	0	20	2	444	22	938	477	[351,1,481,57]	90.25	0.9765	5	3	339	0.1418	32	0.03165	69	0.03369	6	0.003454	32	4856	6	1643
True	B	9	0	0	20	3	487	43	952	472	[466,14,509,64]	67.13	0.9352	6	4	188	0.09815	19	0.02527	13	0.0133	1	0.001443	19	4927	1	672.5
True	B	9	0	0	20	4	79	37	831	471	[23,1,150,97]	145.5	0.8926	7	5	461	0.131	43	0.02638	692	0.09408	64	0.01109	43	3361	64	3315
True	B	9	0	0	20	5	507	77	958	460	[467,50,535,111]	103.1	1.021	8	6	439	0.1331	41	0.0355	13	0.005738	1	0.0007605	41	4980	1	519
True	B	9	0	0	20	6	31	100	816	456	[1,45,68,130]	99.63	0.8764	9	7	337	0.1429	30	0.02688	50	0.03158	4	0.002492	30	3544	4	1318
True	B	9	0	0	20	7	556	95	974	455	[521,63,594,128]	114.5	1.008	10	8	444	0.1273	45	0.03507	0	0	0	0	45	5027	0	NaN
True	B	9	0	0	20	8	572	169	978	434	[537,123,612,205]	154.5	0.9548	12	10	632	0.1365	59	0.03408	31	0.01894	3	0.001169	59	4985	3	1198
True	B	9	0	0	20	9	206	189	869	427	[175,158,237,221]	131.4	0.899	13	11	448	0.1276	42	0.02853	31	0.03619	3	0.001969	42	4880	3	1574
True	B	9	0	0	20	10	629	716	996	270	[602,692,658,739]	51.33	0.874	18	12	115	0.1735	9	0.01565	13	0.009084	1	0.00105	9	4668	1	668.2
True	B	9	0	0	20	11	603	741	991	262	[583,716,652,768]	78.56	0.8615	19	13	153	0.09716	12	0.01364	11	0.0006016	1	0.0008547	12	2279	1	390.6
True	B	9	0	0	20	12	767	845	1037	231	[738,821,801,871]	112.4	0.9588	21	14	281	0.1496	24	0.01906	26	0.08205	2	0.002158	24	3880	2	2693
True	B	9	0	0	20	13	720	891	1023	218	[676,852,759,936]	117.5	0.9205	22	15	454	0.1384	43	0.03267	13	0.01075	1	0.0003704	43	5805	1	1863
True	B	9	0	0	20	14	184	110	865	452	[150,73,260,145]	168.5	0.9196	25	16	523	0.171	45	0.02385	11	0.0003629	1	0.0004394	45	4098	1	261.4
True	B	9	0	0	21	1	328	193	259	426	[300,168,352,217]	82.22	0.9679	2	2	304	0.09908	30	0.03257	13	0.03337	1	0.0009091	30	6329	1	2924
True	B	9	0	0	21	2	419	199	286	425	[380,162,448,235]	123.4	0.947	3	3	614	0.1205	58	0.04197	86	0.07212	7	0.00385	58	4706	7	1894
True	B	9	0	0	21	3	386	244	278	411	[360,212,429,275]	155.9	0.8658	4	4	441	0.1513	40	0.02291	65	0.1218	5	0.00821	40	4143	5	2378
True	B	9	0	0	21	4	450	259	296	407	[418,230,481,288]	92.4	0.855	5	5	123	0.06867	10	0.009662	12	0.000464	1	0.0006583	10	2507	1	870.2
True	B	9	0	0	21	5	422	291	287	397	[393,256,449,320]	121.9	0.846	6	6	291	0.162	26	0.01903	0	0	0	0	26	3745	0	NaN
True	B	9	0	0	21	6	382	354	275	379	[337,318,418,379]	164.7	0.9512	7	7	609	0.128	62	0.0336	0	0	0	0	62	4662	0	NaN
True	B	9	0	0	21	7	389	421	278	362	[373,374,409,439]	64.01	0.7967	8	8	239	0.1146	24	0.03347	0	0	0	0	24	5446	0	NaN
True	B	9	0	0	21	8	130	424	200	358	[96,387,156,449]	112.4	0.9588	9	9	279	0.1713	25	0.01986	13	0.003257	1	0.00102	25	3549	1	653.5
True	B	9	0	0	21	9	305	429	253	356	[276,399,332,462]	115.4	0.9643	10	10	264	0.1522	23	0.01779	0	0	0	0	23	4409	0	NaN
True	B	9	0	0	21	10	159	457	208	347	[107,427,190,488]	45.26	0.9099	11	11	44	0.08456	4	0.00789	23	0.003207	2	0.0007937	4	3725	2	1032
True	B	9	0	0	21	11	60	485	180	340	[23,443,92,521]	152.6	0.9478	12	12	483	0.1379	45	0.02633	26	0.005952	2	0.001044	45	3657	2	664.1
True	B	9	0	0	21	12	119	494	197	337	[90,449,148,526]	150.2	0.9962	13	13	361	0.1358	33	0.01962	0	0	0	0	33	3416	0	NaN
True	B	9	0	0	21	13	169	509	212	332	[143,479,190,540]	43.65	0.9327	14	14	92	0.08634	9	0.0184	20	0.001277	2	0.001282	9	2043	2	836
True	B	9	0	0	21	14	77	534	185	323	[52,506,102,569]	111.9	0.9948	15	15	445	0.1437	41	0.03272	0	0	0	0	41	3578	0	NaN
True	B	9	0	0	21	15	508	556	314	319	[478,517,538,595]	115.6	0.9468	16	16	446	0.1632	39	0.03012	26	0.01177	2	0.00119	39	4970	2	1038
True	B	9	0	0	21	16	115	545	199	321	[89,517,165,578]	74.63	0.9145	18	18	225	0.1241	19	0.02273	37	0.009888	3	0.001479	19	4102	3	1449
True	B	9	0	0	21	17	346	582	265	310	[313,542,385,617]	138.7	0.9688	19	19	457	0.175	42	0.02703	22	0.0002025	3	0.001622	42	4607	3	298.8
True	B	9	0	0	21	18	143	591	204	308	[99,557,185,624]	91.06	0.9297	20	20	204	0.1337	17	0.01667	11	0.0003261	1	0.0003656	17	3600	1	775.1
True	B	9	0	0	21	19	30	612	171	300	[1,576,64,657]	140	0.9738	21	21	459	0.1651	41	0.02615	64	0.04142	6	0.004335	41	3479	6	1551
True	B	9	0	0	21	20	409	622	284	297	[381,594,436,660]	100.3	0.9341	22	22	358	0.1636	33	0.02936	54	0.01003	5	0.003794	33	4493	5	681.5
True	B	9	0	0	21	21	51	671	177	285	[22,630,82,705]	142.7	0.9677	23	23	491	0.1568	45	0.02814	51	0.02458	4	0.003094	45	3748	4	747.7
True	B	9	0	0	21	22	86	748	188	264	[53,686,116,780]	137.9	0.9655	24	24	499	0.114	50	0.03236	52	0.0288	4	0.001609	50	4048	4	1421
True	B	9	0	0	21	23	77	803	185	244	[46,774,107,831]	96.41	0.9511	25	25	352	0.1272	35	0.03241	26	0.03953	2	0.001564	35	4212	2	1662
True	B	9	0	0	21	24	78	856	186	229	[41,828,112,889]	119.9	0.9762	26	26	467	0.1424	44	0.03276	0	0	0	0	44	4422	0	NaN
True	B	9	0	0	21	25	209	872	224	224	[179,847,246,899]	98.91	0.9966	27	27	379	0.1488	35	0.03159	21	0.01074	2	0.001724	35	5011	2	591.9
True	B	9	0	0	21	26	1026	997	468	186	[984,962,1058,1034]	152.5	0.9171	28	28	462	0.1085	44	0.02576	39	0.02672	3	0.001517	44	3902	3	1089
True	B	9	0	0	21	27	1054	1044	476	172	[1019,1019,1078,1067]	106.6	0.9389	29	29	328	0.1222	31	0.02596	0	0	0	0	31	2731	0	NaN
True	B	9	0	0	21	28	1000	1038	461	172	[973,1016,1027,1075]	79	0.9567	30	30	301	0.1241	27	0.03051	12	0.004684	1	0.0009737	27	3317	1	1167
True	B	9	0	0	21	29	363	298	271	395	[328,256,409,336]	186.4	1.013	33	33	654	0.1175	65	0.03113	63	0.03416	5	0.002453	65	4928	5	1267
True	B	9	0	0	21	30	347	398	267	365	[317,357,381,432]	156.7	0.9703	34	34	628	0.15	59	0.03362	13	0.004211	1	0.0008905	59	4831	1	470.2
True	B	9	0	0	21	31	396	472	280	343	[364,437,430,514]	166.6	0.9728	35	35	574	0.1365	54	0.02894	39	0.04931	3	0.001787	54	4718	3	1712
True	B	9	0	0	21	32	274	481	244	339	[250,450,299,515]	152.2	0.9704	36	36	500	0.1485	46	0.02698	13	0.08527	1	0.002481	46	3679	1	2884
True	B	9	0	0	21	33	376	535	273	326	[341,483,410,569]	180.5	0.9082	37	37	577	0.1428	52	0.02572	52	0.06058	4	0.002699	52	5137	4	1823
True	B	9	0	0	21	34	424	565	288	314	[376,529,470,606]	201.5	0.9205	38	38	697	0.1592	61	0.02703	13	0.03158	1	0.0005107	61	4295	1	3617
True	B	9	0	0	21	35	77	593	184	305	[38,554,113,644]	160.5	1	39	39	625	0.129	62	0.03448	13	0.01526	1	0.0005294	62	4789	1	1520
True	B	9	0	0	21	36	405	679	283	282	[376,645,440,707]	151	0.9267	40	40	474	0.1355	45	0.02661	26	0.04506	2	0.001833	45	4339	2	1752
True	B	9	0	0	21	37	41	734	173	264	[1,689,72,774]	157.3	0.9889	41	41	550	0.141	51	0.02894	0	0	0	0	51	3899	0	NaN
True	B	9	0	0	21	38	255	891	239	215	[222,864,284,934]	164.6	0.9509	42	42	555	0.1457	50	0.02712	50	0.09254	4	0.003984	50	3300	4	2686
True	B	9	0	0	22	1	568	129	-315	446	[530,82,596,166]	116.3	0.8905	2	2	229	0.1173	20	0.01535	13	0.001355	1	0.0007037	20	2172	1	377.2
True	B	9	0	0	22	2	295	328	-395	386	[282,304,313,342]	42.31	0.9012	5	3	0	0	0	0	0	0	0	0	0	NaN	0	NaN
True	B	9	0	0	22	3	197	634	-423	293	[174,608,251,674]	137	0.9619	7	4	312	0.1664	25	0.01629	50	0.09775	4	0.005642	25	3584	4	1503
True	B	9	0	0	22	4	242	695	-413	278	[207,660,266,727]	93.2	0.7956	8	5	78	0.1743	6	0.005747	129	0.1636	10	0.007474	6	2684	10	2315
True	B	9	0	0	22	5	281	751	-399	259	[256,721,315,784]	101.5	0.9036	9	6	292	0.1438	26	0.02287	13	0.003799	1	0.0009434	26	3486	1	521.4
True	B	9	0	0	22	6	333	785	-384	249	[308,761,356,808]	77.84	0.9829	10	7	216	0.1837	18	0.02064	13	0.01089	1	0.001284	18	2792	1	1155
True	B	9	0	0	22	7	293	798	-396	244	[272,777,317,830]	87.31	0.9169	11	8	163	0.1581	13	0.01329	13	0.04103	1	0.001605	13	2677	1	2377
True	B	9	0	0	22	8	354	828	-378	237	[328,801,376,852]	110.1	0.9473	12	9	297	0.1246	28	0.02271	0	0	0	0	28	3955	0	NaN
True	B	9	0	0	22	9	415	827	-362	236	[371,803,452,858]	105.5	0.9065	13	10	312	0.1433	28	0.02369	24	0.01734	2	0.00117	28	3969	2	1126
True	B	9	0	0	22	10	315	825	-390	237	[290,806,335,850]	65.88	0.9133	14	11	89	0.1666	7	0.009485	11	0.0008232	1	0.001808	7	3149	1	292.8
True	B	9	0	0	22	11	414	877	-359	224	[376,834,459,910]	111.1	0.9429	15	12	381	0.1608	36	0.02894	0	0	0	0	36	4147	0	NaN
True	B	9	0	0	22	12	440	911	-353	208	[411,883,471,967]	132.6	0.9114	16	13	379	0.1919	32	0.02155	18	0.001411	2	0.001063	32	3789	2	601.6
True	B	9	0	0	22	13	328	734	-386	265	[289,703,360,768]	152.4	0.9242	17	14	385	0.135	35	0.0205	39	0.04417	3	0.00191	35	3722	3	2053
True	B	9	0	0	23	1	208	23	-1069	474	[175,1,232,71]	114.5	0.9417	3	2	451	0.1337	44	0.03429	0	0	0	0	44	3944	0	NaN
True	B	9	0	0	23	2	147	48	-1087	470	[129,24,162,66]	91.15	0.8481	4	3	81	0.07025	7	0.006856	0	NaN	0	NaN	7	1224	0	NaN
True	B	9	0	0	23	3	112	104	-1094	452	[85,76,167,132]	160.6	0.9228	5	4	532	0.126	51	0.02835	13	0.03503	1	0.000721	51	4132	1	2631
True	B	9	0	0	23	4	87	146	-1105	441	[63,126,114,168]	73.83	0.8778	6	5	102	0.1578	8	0.009674	52	0.1016	4	0.006231	8	2206	4	1606
True	B	9	0	0	23	5	57	191	-1114	426	[27,162,82,220]	121.3	0.9829	7	6	295	0.1337	27	0.01987	13	0.02908	1	0.001244	27	3844	1	2213
True	B	9	0	0	23	6	113	281	-1096	402	[88,234,137,310]	104.9	0.9782	9	8	311	0.1389	29	0.02468	13	0.01427	1	0.0007184	29	3414	1	1330
True	B	9	0	0	23	7	674	331	-929	383	[651,302,698,376]	109.6	0.8924	10	9	162	0.1525	13	0.01059	38	0.03023	3	0.002534	13	3557	3	1220
True	B	9	0	0	23	8	437	668	-1002	284	[398,642,460,696]	113.9	0.9126	11	10	253	0.1569	21	0.01646	13	0.05329	1	0.001048	21	4427	1	2579
True	B	9	0	0	23	9	393	705	-1013	272	[364,675,414,736]	82.93	0.9192	12	11	246	0.1758	22	0.02368	0	0	0	0	22	4527	0	NaN
True	B	9	0	0	23	10	424	725	-1003	268	[395,691,447,753]	93.02	0.9028	13	12	302	0.1896	26	0.02495	0	0	0	0	26	4510	0	NaN
True	B	9	0	0	23	11	326	722	-1033	268	[281,685,370,756]	155.3	0.8911	14	13	444	0.1781	39	0.02241	0	0	0	0	39	3763	0	NaN
True	B	9	0	0	23	12	398	777	-1011	253	[353,739,431,809]	104.7	0.9385	15	14	331	0.1254	34	0.02899	0	0	0	0	34	5764	0	NaN
True	B	9	0	0	23	13	338	794	-1029	245	[309,763,364,837]	107.2	0.9238	16	15	353	0.1534	33	0.02748	13	0.00307	1	0.0007519	33	5060	1	375.1
True	B	9	0	0	23	14	375	827	-1018	236	[340,790,403,875]	138.3	0.9843	17	16	417	0.1634	38	0.02453	8	0.000333	1	0.0007057	38	5114	1	298.1
True	B	9	0	0	23	15	445	857	-998	227	[412,828,470,904]	115.1	0.9625	18	17	278	0.1694	24	0.01862	13	0.03265	1	0.0007905	24	4485	1	3913
True	B	9	0	0	23	16	348	863	-1025	226	[324,840,369,893]	75.61	0.9664	19	18	101	0.1563	8	0.009445	0	0	0	0	8	3337	0	NaN
True	B	9	0	0	23	17	481	893	-986	216	[425,856,523,928]	215.9	0.8776	20	19	618	0.1445	58	0.02399	26	0.03704	2	0.0009212	58	4933	2	2698
True	B	9	0	0	23	18	403	894	-1009	218	[378,861,433,919]	80.17	0.8814	21	20	223	0.1313	21	0.02339	0	0	0	0	21	5536	0	NaN
True	B	9	0	0	23	19	384	935	-1015	203	[364,913,403,973]	78.47	0.9419	22	21	116	0.1641	10	0.01138	26	0.1169	2	0.00274	10	2788	2	3269
True	B	9	0	0	23	20	415	970	-1005	195	[384,936,451,999]	82.84	0.9394	23	22	229	0.1589	21	0.02263	0	0	0	0	21	4127	0	NaN
True	B	9	0	0	23	21	252	989	-1054	190	[222,923,286,1030]	103	0.9781	24	23	267	0.1812	22	0.01906	0	0	0	0	22	3339	0	NaN
True	B	9	0	0	23	22	286	788	-1046	246	[242,749,322,850]	155	0.9805	27	26	426	0.176	38	0.02189	0	0	0	0	38	3745	0	NaN
True	B	9	0	0	23	23	611	812	-947	242	[565,766,664,853]	164	0.9413	28	27	232	0.1184	19	0.01034	32	0.01278	3	0.000996	19	2881	3	1072
True	B	9	0	0	23	24	539	1042	-967	173	[503,1000,588,1078]	218.1	0.8288	29	28	544	0.1865	44	0.01801	65	0.004222	7	0.003356	44	3048	7	498.9
True	B	9	0	0	24	1	455	24	-1318	155	[406,1,495,50]	66.77	0.8874	3	2	68	0.01857	7	0.009358	0	0	0	0	7	1178	0	NaN
True	B	9	0	0	24	2	254	47	-1376	146	[224,11,287,96]	103.8	0.9067	4	3	340	0.1782	29	0.02494	13	0.02341	1	0.0004796	29	3467	1	2968
True	B	9	0	0	24	3	476	63	-1310	142	[450,38,506,90]	71.68	0.8827	5	4	181	0.1551	15	0.01868	0	0	0	0	15	3009	0	NaN
True	B	9	0	0	24	4	370	95	-1342	133	[339,62,400,123]	111.2	0.9438	6	5	224	0.1301	19	0.01525	24	0.01294	2	0.001253	19	4695	2	1586
True	B	9	0	0	24	5	420	83	-1328	135	[391,54,444,123]	63.83	0.9432	7	6	85	0.1246	7	0.00979	0	0	0	0	7	3941	0	NaN
True	B	9	0	0	24	6	223	97	-1388	125	[190,55,258,199]	80.52	0.772	8	7	58	0.0436	5	0.005543	23	0.0007166	2	0.0003378	5	1498	2	602.1
True	B	9	0	0	24	7	507	108	-1304	129	[465,78,534,139]	136.5	0.9683	9	8	351	0.1488	31	0.02027	42	0.001366	5	0.003418	31	3840	5	587.6
True	B	9	0	0	24	8	288	149	-1367	115	[248,97,329,208]	179.5	0.9326	10	9	617	0.186	53	0.02636	26	0.01421	2	0.0005831	53	4281	2	2085
True	B	9	0	0	24	9	437	151	-1324	117	[403,125,462,177]	140.1	0.925	11	10	373	0.1527	34	0.02167	13	0.06405	1	0.001466	34	3858	1	6760
True	B	9	0	0	24	10	487	165	-1309	110	[451,137,514,205]	121.5	0.9837	12	11	272	0.1564	23	0.0169	0	0	0	0	23	5702	0	NaN
True	B	9	0	0	24	11	518	196	-1298	103	[486,159,545,228]	64.99	0.8732	13	12	32	0.01505	3	0.004121	0	0	0	0	3	1901	0	NaN
True	B	9	0	0	24	12	324	195	-1356	103	[288,164,353,225]	122.8	0.9192	14	13	252	0.1156	23	0.01672	93	0.01628	8	0.005366	23	5292	8	1066
True	B	9	0	0	24	13	252	238	-1378	90	[230,202,277,274]	98.56	0.9735	15	14	231	0.1683	19	0.01721	13	0.04359	1	0.0008511	19	4068	1	3664
True	B	9	0	0	24	14	351	237	-1348	90	[329,205,376,264]	94.27	0.9905	16	15	173	0.1591	14	0.01326	13	0.002227	1	0.001081	14	4214	1	407.5
True	B	9	0	0	24	15	463	239	-1314	89	[429,202,497,283]	136.5	0.9036	17	16	196	0.1226	17	0.01112	70	0.08109	6	0.003743	17	3357	6	2256
True	B	9	0	0	24	16	505	267	-1303	81	[460,226,535,305]	66.77	0.8874	18	17	25	0.008008	2	0.002674	13	0.004572	1	0.0003863	2	1377	1	989.8
True	B	9	0	0	24	17	386	287	-1338	75	[358,261,419,317]	98.29	0.8867	19	18	252	0.1551	22	0.01998	13	0.0138	1	0.0007593	22	5115	1	1949
True	B	9	0	0	24	18	288	305	-1368	70	[255,274,321,335]	133	0.9211	20	19	365	0.1519	31	0.02081	38	0.003594	4	0.002489	31	4419	4	850.8
True	B	9	0	0	24	19	499	326	-1304	63	[469,301,530,351]	53.65	0.8075	21	20	151	0.1596	12	0.01997	9	0.0002606	1	0.0006192	12	4545	1	421.2
True	B	9	0	0	24	20	337	344	-1353	59	[306,304,366,380]	120.5	0.9429	22	21	354	0.1638	32	0.0237	49	0.001776	5	0.002764	32	5129	5	380.1
True	B	9	0	0	24	21	452	347	-1319	56	[412,314,480,391]	97.31	0.9463	23	22	210	0.1442	19	0.01743	24	0.01247	2	0.0009483	19	5914	2	965.8
True	B	9	0	0	24	22	399	335	-1334	60	[367,304,426,360]	102.6	0.9003	24	23	310	0.154	28	0.02437	39	0.1277	3	0.003589	28	5508	3	3166
True	B	9	0	0	24	23	280	358	-1369	55	[249,324,314,384]	89.45	0.9608	25	24	161	0.1426	14	0.01397	48	0.02435	4	0.002694	14	4373	4	973
True	B	9	0	0	24	24	534	360	-1298	52	[472,336,558,390]	41.24	0.9159	26	25	63	0.08119	6	0.01299	0	0	0	0	6	1775	0	NaN
True	B	9	0	0	24	25	224	309	-1386	60	[186,268,262,413]	54.46	0.9576	27	26	107	0.07839	10	0.01639	13	0.0001668	1	0.0001321	10	4015	1	497.3
True	B	9	0	0	24	26	476	399	-1311	40	[453,376,500,440]	65.35	0.9817	28	27	115	0.08592	11	0.01503	0	0	0	0	11	5259	0	NaN
True	B	9	0	0	24	27	515	408	-1298	39	[482,381,560,440]	107.4	0.9619	29	28	207	0.1568	17	0.01413	13	0.03748	1	0.0007143	17	4667	1	3531
True	B	9	0	0	24	28	256	423	-1377	34	[228,389,287,458]	101.4	0.9304	30	29	235	0.1441	21	0.01849	59	0.002981	5	0.004052	21	3938	5	444
True	B	9	0	0	24	29	378	441	-1340	29	[342,411,420,473]	85.88	0.9179	32	30	192	0.1512	17	0.01767	45	0.001865	4	0.001942	17	5115	4	428.6
True	B	9	0	0	24	30	332	464	-1354	18	[302,433,361,532]	93.65	0.9655	33	31	276	0.1555	25	0.02383	51	0.01567	4	0.001419	25	4518	4	1020
True	B	9	0	0	24	31	284	452	-1368	26	[244,422,312,477]	70.79	0.9298	34	32	151	0.1409	13	0.01639	65	0.03448	6	0.004481	13	3940	6	1089
True	B	9	0	0	24	32	521	489	-1301	19	[449,433,559,526]	116.5	0.9333	35	33	309	0.1537	28	0.02146	78	0.01815	7	0.001592	28	5009	7	3081
True	B	9	0	0	24	33	277	495	-1369	14	[255,464,321,524]	99.54	0.9393	37	34	265	0.1556	23	0.02063	39	0.068	3	0.002695	23	4817	3	2566
True	B	9	0	0	24	34	448	485	-1318	16	[418,442,490,520]	64.36	0.9603	38	35	80	0.1377	7	0.009709	58	0.01593	5	0.00207	7	4558	5	980.6
True	B	9	0	0	24	35	392	502	-1333	9	[332,437,469,563]	89.54	0.9305	39	36	239	0.145	21	0.02094	36	0.009472	3	0.0004615	21	5441	3	1642
True	B	9	0	0	24	36	481	541	-1308	-1	[450,511,529,575]	128.6	0.9527	40	37	281	0.1422	25	0.01735	57	0.03993	5	0.003005	25	5577	5	2345
True	B	9	0	0	24	37	204	565	-1390	-9	[181,536,272,629]	85.08	0.7124	41	38	26	0.008827	2	0.002099	0	0	0	0	2	654.2	0	NaN
True	B	9	0	0	24	38	365	565	-1340	-8	[327,528,433,605]	128.2	0.9507	42	39	192	0.1303	15	0.01045	35	0.001678	3	0.0007736	15	3429	3	519.8
True	B	9	0	0	24	39	235	592	-1385	-22	[192,552,265,673]	121.5	0.9301	45	40	259	0.1378	22	0.01616	142	0.003397	13	0.003828	22	3729	13	480
True	B	9	0	0	24	40	278	603	-1371	-19	[249,555,305,645]	102.6	0.8746	46	41	274	0.1515	25	0.02176	36	0.0369	3	0.00254	25	5329	3	1426
True	B	9	0	0	24	41	441	596	-1321	-17	[412,562,468,627]	91.5	0.8941	47	42	226	0.1633	19	0.01854	0	0	0	0	19	4679	0	NaN
True	B	9	0	0	24	42	383	613	-1338	-23	[354,588,416,645]	105.1	0.913	48	43	258	0.1347	23	0.01954	28	0.002308	3	0.002882	23	4636	3	675.8
True	B	9	0	0	24	43	339	618	-1351	-25	[304,593,368,653]	68.02	0.9425	49	44	108	0.1455	9	0.01181	75	0.007388	7	0.005978	9	3563	7	723.1
True	B	9	0	0	24	44	430	637	-1324	-29	[405,618,462,656]	87.49	0.9279	50	45	244	0.1236	24	0.02449	13	0.08703	1	0.002179	24	5784	1	4707
True	B	9	0	0	24	45	299	631	-1365	-29	[271,609,320,669]	93.11	0.9943	51	46	185	0.1376	16	0.01534	0	0	0	0	16	5241	0	NaN
True	B	9	0	0	24	46	325	659	-1356	-37	[295,630,353,689]	72.85	0.8809	53	48	150	0.1576	12	0.01471	12	0.0005597	1	0.0007337	12	4683	1	429.2
True	B	9	0	0	24	47	251	658	-1377	-37	[225,631,281,695]	79.81	0.9624	54	49	119	0.1353	10	0.01119	9	0.0003658	1	0.0007868	10	5167	1	418
True	B	9	0	0	24	48	422	696	-1326	-46	[402,665,447,723]	100.8	0.9759	56	50	288	0.1551	26	0.02303	13	0.06052	1	0.001565	26	4671	1	3797
True	B	9	0	0	24	49	303	708	-1361	-51	[276,681,337,737]	96.95	0.9851	57	51	176	0.141	15	0.01381	47	0.06469	4	0.002961	15	3718	4	2153
True	B	9	0	0	24	50	227	707	-1382	-54	[183,658,294,783]	90.52	0.9265	58	52	240	0.1501	21	0.02071	65	0.002824	6	0.0009544	21	5144	6	699.1
True	B	9	0	0	24	51	314	755	-1359	-64	[284,731,339,779]	82.67	0.9823	59	53	138	0.152	11	0.01188	13	0.05597	1	0.001057	11	3576	1	3923
True	B	9	0	0	24	52	220	776	-1388	-69	[185,730,250,807]	52.67	0.9127	60	54	62	0.1173	5	0.008475	13	0.01013	1	0.0003774	5	2975	1	2751
True	B	9	0	0	24	53	413	787	-1330	-75	[380,764,444,821]	61.15	0.9698	61	55	98	0.1441	9	0.01314	12	0.0008108	1	0.0005685	9	3060	1	656.8
True	B	9	0	0	24	54	302	801	-1362	-79	[277,771,329,827]	93.2	0.9325	62	56	210	0.1426	18	0.01724	35	0.05244	3	0.004098	18	4363	3	1641
True	B	9	0	0	24	55	257	810	-1375	-81	[231,775,285,843]	98.11	0.9314	63	57	240	0.138	21	0.01911	23	0.03574	2	0.001397	21	4765	2	1651
True	B	9	0	0	24	56	461	817	-1315	-83	[435,791,491,846]	70.17	0.8715	64	58	168	0.1628	14	0.01781	5	0	1	0.0007057	14	5225	1	343
True	B	9	0	0	24	57	420	840	-1327	-89	[397,807,446,870]	86.15	0.9504	65	59	210	0.171	18	0.01865	21	0.01836	2	0.00209	18	4768	2	943.7
True	B	9	0	0	24	58	337	835	-1353	-89	[299,805,368,867]	82.04	0.978	67	60	140	0.1433	11	0.01197	13	0.002666	1	0.0006184	11	3823	1	606.7
True	B	9	0	0	24	59	213	836	-1385	-92	[184,796,279,888]	91.95	0.945	68	61	250	0.1563	21	0.02039	103	0.002517	9	0.002265	21	4828	9	513.2
True	B	9	0	0	24	60	494	877	-1304	-100	[455,829,541,918]	42.85	0.9224	70	62	72	0.09255	6	0.0125	28	0.0004479	3	0.0007431	6	3154	3	661.7
True	B	9	0	0	24	61	322	891	-1356	-105	[290,856,349,925]	97.48	0.8824	71	63	276	0.1831	25	0.02289	0	0	0	0	25	4977	0	NaN
True	B	9	0	0	24	62	214	894	-1390	-109	[183,863,244,948]	119.9	0.9401	72	64	301	0.1188	27	0.0201	21	0.0004659	2	0.0008439	27	3328	2	370.2
True	B	9	0	0	24	63	260	918	-1375	-113	[232,881,293,954]	94.54	0.9921	74	66	258	0.147	24	0.02266	0	0	0	0	24	4543	0	NaN
True	B	9	0	0	24	64	307	939	-1361	-120	[274,908,342,970]	124.1	0.9863	76	67	251	0.1488	21	0.01511	13	0.0005888	1	0.0008183	21	4875	1	343.5
True	B	9	0	0	24	65	1056	949	-1136	-123	[1033,924,1078,983]	112.2	0.9486	77	68	354	0.1363	33	0.02625	13	0.005789	1	0.001245	33	4106	1	502.3
True	B	9	0	0	24	66	1017	957	-1149	-125	[995,932,1041,985]	74.45	0.924	78	69	180	0.1607	15	0.01799	10	0.0004578	1	0.001232	15	3919	1	467.6
True	B	9	0	0	24	67	350	962	-1347	-127	[320,922,381,1002]	90.79	0.9183	79	70	188	0.1067	16	0.01573	13	0.02324	1	0.0005507	16	4045	1	3580
True	B	9	0	0	24	68	455	994	-1319	-136	[368,933,513,1066]	77.04	0.8158	80	71	0	0	0	0	0	0	0	0	0	NaN	0	NaN
True	B	9	0	0	24	69	218	978	-1387	-131	[184,935,265,1021]	103.6	0.9237	81	72	191	0.09225	16	0.01378	86	0.00229	8	0.002458	16	2009	8	460
True	B	9	0	0	24	70	301	994	-1363	-136	[272,954,336,1023]	76.42	0.9382	82	73	176	0.09673	17	0.01986	24	0.02695	2	0.001149	17	4493	2	2551
True	B	9	0	0	24	71	1040	990	-1143	-135	[1013,967,1065,1020]	72.93	0.7493	83	74	13	0.03185	1	0.001224	13	0.01714	1	0.001247	1	2212	1	1526
True	B	9	0	0	24	72	343	1024	-1349	-146	[318,991,372,1062]	119.9	0.9489	85	76	231	0.1212	20	0.01489	0	0	0	0	20	3961	0	NaN
True	B	9	0	0	24	73	249	1027	-1379	-149	[216,980,275,1078]	142.9	0.9684	86	77	345	0.1285	31	0.01936	17	0.0005322	2	0.001084	31	3798	2	363
True	B	9	0	0	24	74	387	1027	-1337	-147	[364,1003,414,1056]	91.86	0.9246	87	78	155	0.1293	13	0.01263	0	0	0	0	13	4835	0	NaN
True	B	9	0	0	24	75	384	202	-1338	101	[352,170,414,235]	125.9	1.014	92	82	209	0.1295	19	0.01348	36	0.004424	3	0.002044	19	3666	3	597.2
True	B	9	0	0	24	76	299	244	-1364	88	[272,209,328,277]	142.9	0.9601	93	83	406	0.1622	37	0.02311	22	0.01537	2	0.002225	37	5075	2	1195
True	B	9	0	0	24	77	414	253	-1330	85	[374,225,448,283]	137.3	0.9802	94	84	259	0.1631	21	0.01365	51	0.1078	4	0.00366	21	4401	4	3173
True	B	9	0	0	24	78	1050	803	-1139	-79	[1019,769,1078,847]	140.8	0.977	95	85	405	0.1599	37	0.02346	24	0.01386	2	0.001373	37	4168	2	680.1
True	B	9	0	0	25	1	518	24	-652	154	[490,6,548,44]	60.35	0.8352	3	3	84	0.1109	7	0.01036	60	0.01768	5	0.005917	7	2925	5	1188
True	B	9	0	0	25	2	603	90	-624	134	[577,57,651,123]	117.6	0.9653	4	4	350	0.1313	34	0.02582	0	0	0	0	34	3807	0	NaN
True	B	9	0	0	25	3	523	103	-646	129	[494,64,587,151]	105.1	0.9692	5	5	313	0.1566	28	0.02379	26	0.02291	2	0.0006849	28	4186	2	2562
True	B	9	0	0	25	4	396	117	-689	127	[360,70,440,151]	110.3	0.9674	6	6	320	0.1605	29	0.02346	26	0.0476	2	0.0009867	29	3443	2	2405
True	B	9	0	0	25	5	605	143	-626	120	[575,109,643,170]	143.1	0.9776	7	7	404	0.1759	36	0.02246	10	0.000269	1	0.0008251	36	3651	1	302.8
True	B	9	0	0	25	6	460	141	-670	118	[431,119,486,166]	90.25	0.9056	8	8	247	0.1546	21	0.02077	26	0.05252	2	0.002677	21	4396	2	2122
True	B	9	0	0	25	7	503	157	-659	111	[466,131,529,213]	125.4	0.8901	9	9	202	0.1689	17	0.0121	106	0.01374	9	0.005852	17	4786	9	1366
True	B	9	0	0	25	8	411	162	-685	114	[374,128,435,191]	74.18	0.7649	10	10	0	0	0	0	13	0.002061	1	0.000753	0	NaN	1	597.9
True	B	9	0	0	25	9	556	169	-640	109	[521,133,599,219]	131.8	0.9747	11	11	262	0.1597	21	0.01423	13	0.0135	1	0.0003855	21	3898	1	3499
True	B	9	0	0	25	10	443	196	-675	103	[410,156,471,224]	147.1	0.9516	12	12	299	0.1633	26	0.01578	0	0	0	0	26	4442	0	NaN
True	B	9	0	0	25	11	393	195	-691	102	[369,166,419,231]	108.8	0.9891	13	13	360	0.1524	32	0.02625	18	0.002541	2	0.002181	32	3522	2	853
True	B	9	0	0	25	12	518	203	-654	99	[463,176,555,238]	111.1	0.9911	14	14	445	0.1481	42	0.03373	63	0.06466	5	0.002999	42	4648	5	2480
True	B	9	0	0	25	13	559	227	-638	93	[537,207,595,249]	82.84	0.9501	15	15	258	0.1715	24	0.02586	32	0.00252	3	0.003476	24	4549	3	558.7
True	B	9	0	0	25	14	562	268	-638	81	[537,246,598,293]	95.7	0.947	17	16	203	0.1652	18	0.01679	13	0.001487	1	0.00111	18	4139	1	471.8
True	B	9	0	0	25	15	479	266	-663	82	[461,241,499,283]	49.72	0.9341	18	17	71	0.1258	6	0.01077	21	0.007725	2	0.004556	6	3285	2	1374
True	B	9	0	0	25	16	522	281	-651	76	[496,262,549,303]	54.37	0.8352	19	18	30	0.006549	4	0.006568	36	0.04437	3	0.003559	4	1632	3	1462
True	B	9	0	0	25	17	393	293	-689	73	[368,258,419,326]	60.88	0.9417	20	19	140	0.1219	13	0.01906	49	0.06368	4	0.002905	13	5706	4	2580
True	B	9	0	0	25	18	574	305	-636	69	[546,277,602,341]	61.51	0.8347	21	20	5	-8.501e-05	1	0.001451	0	0	0	0	1	586	0	NaN
True	B	9	0	0	25	19	525	324	-651	64	[492,298,559,354]	122	0.9769	22	21	316	0.1162	30	0.02195	27	0.001556	3	0.002222	30	5574	3	607.5
True	B	9	0	0	25	20	275	471	-724	21	[237,437,324,503]	143.7	0.9389	23	22	419	0.1612	38	0.0236	13	0.01281	1	0.0004502	38	3952	1	1842
True	B	9	0	0	25	21	252	521	-730	5	[225,488,295,552]	127	0.8814	24	23	298	0.1489	28	0.01968	26	0.002055	2	0.001184	28	3674	2	402.7
True	B	9	0	0	25	22	702	946	-598	-120	[675,901,724,980]	157	0.9181	25	24	602	0.1595	55	0.03127	0	0	0	0	55	4136	0	NaN
True	B	9	0	0	25	23	658	932	-610	-119	[631,898,682,976]	63.65	0.873	26	25	52	0.1237	4	0.00561	7	1.346e-05	1	0.0004625	4	3429	1	312.6
True	B	9	0	0	25	24	782	1001	-573	-139	[757,976,819,1037]	103	0.8685	28	27	392	0.1555	39	0.0338	13	0.0362	1	0.0009337	39	4329	1	2044
True	B	9	0	0	25	25	830	1031	-560	-146	[785,998,860,1060]	134.4	0.8523	29	28	448	0.1849	41	0.02722	26	0.006664	2	0.001416	41	4315	2	647.8
True	B	9	0	0	25	26	553	52	-643	145	[514,16,584,92]	153.1	0.8768	30	29	397	0.1271	37	0.02157	24	0.02049	2	0.001305	37	4163	2	1570
True	B	9	0	0	25	27	484	58	-663	143	[452,25,517,108]	138.2	0.9582	31	30	385	0.1747	32	0.02067	13	0.006942	1	0.000602	32	3862	1	832.2
True	B	9	0	0	25	28	413	64	-683	141	[379,30,446,106]	130.1	0.9854	32	31	415	0.1648	37	0.02539	37	0.04306	3	0.002015	37	4600	3	1530
True	B	9	0	0	25	29	421	248	-678	87	[389,212,485,280]	147.1	0.9205	33	32	378	0.14	32	0.01942	39	0.006267	3	0.001254	32	4309	3	1500
True	B	9	0	0	25	30	339	300	-707	72	[298,239,377,340]	211.3	0.9593	34	33	496	0.1961	41	0.01732	0	0	0	0	41	2828	0	NaN
True	B	9	0	0	25	31	454	299	-670	71	[407,267,504,337]	205.7	0.8109	35	34	562	0.1492	49	0.02127	51	0.03442	4	0.001803	49	4980	4	3202
True	B	9	0	0	25	32	746	962	-585	-127	[701,923,777,996]	167.9	0.9773	36	35	512	0.1413	48	0.02552	85	0.05328	7	0.003755	48	3824	7	1454
True	B	9	0	0	25	33	670	1035	-606	-149	[638,1003,705,1076]	132.6	0.9607	37	36	422	0.1734	38	0.02559	51	0.03048	4	0.002002	38	3957	4	1321
True	B	9	0	0	26	1	251	433	559	30	[230,410,273,474]	85.61	0.9365	3	2	306	0.133	30	0.03128	13	0.05476	1	0.001167	30	4859	1	2625
True	B	9	0	0	26	2	332	472	582	20	[303,433,359,510]	122.9	0.945	4	3	464	0.1562	41	0.02977	47	0.03957	4	0.002508	41	5112	4	1381
True	B	9	0	0	26	3	985	507	780	10	[950,468,1023,545]	143.3	0.9783	5	4	334	0.142	30	0.01869	13	0.003027	1	0.0004682	30	4103	1	472.4
True	B	9	0	0	26	4	195	530	544	1	[166,500,228,575]	155.4	0.9273	6	5	519	0.1319	52	0.02987	39	0.07812	3	0.002045	52	4057	3	2504
True	B	9	0	0	26	5	936	534	764	2	[908,509,964,560]	114.9	0.9806	7	6	379	0.1496	34	0.02642	13	0.09127	1	0.00134	34	4428	1	3904
True	B	9	0	0	26	6	1028	565	792	-7	[997,536,1056,600]	113.4	0.8772	8	7	351	0.1439	31	0.02441	13	0.04116	1	0.0008811	31	4114	1	2886
True	B	9	0	0	26	7	903	571	755	-10	[875,542,935,608]	99.45	0.9199	9	8	309	0.1569	28	0.02513	39	0.05731	3	0.001962	28	3464	3	1641
True	B	9	0	0	26	8	145	576	528	-11	[117,547,173,608]	142.9	0.9601	10	9	503	0.1367	49	0.03061	26	0.05859	2	0.002125	49	4927	2	1939
True	B	9	0	0	26	9	187	649	539	-33	[144,603,218,694]	173.3	0.7822	11	10	506	0.1261	49	0.02524	26	0.005388	2	0.0008261	49	5016	2	762.5
True	B	9	0	0	26	10	141	660	526	-40	[113,640,165,707]	137.4	0.7979	12	11	457	0.1275	46	0.02989	73	0.07433	6	0.009804	46	5066	6	1788
True	B	9	0	0	26	11	608	698	666	-48	[576,662,638,751]	112.9	0.908	13	12	339	0.1343	31	0.02451	13	0.02437	1	0.0004941	31	4251	1	2780
True	B	9	0	0	26	12	92	712	512	-53	[62,690,128,746]	87.75	0.8634	15	14	112	0.1267	9	0.009156	206	0.1282	18	0.01603	9	2973	18	2555
True	B	9	0	0	26	13	501	725	634	-56	[464,689,537,761]	119.8	0.9948	16	15	391	0.1283	37	0.02757	0	0	0	0	37	5393	0	NaN
True	B	9	0	0	26	14	139	725	523	-58	[88,696,159,763]	152.2	0.8671	17	16	473	0.1588	44	0.02581	124	0.1586	11	0.0137	44	3900	11	3598
True	B	9	0	0	26	15	649	772	677	-70	[601,744,682,804]	48.92	0.8041	18	17	26	0.005978	2	0.00365	13	0.001608	1	0.0004097	2	850.8	1	404.1
True	B	9	0	0	26	16	82	785	509	-74	[50,756,111,815]	96.68	0.9526	19	18	283	0.1343	25	0.02308	37	0.00537	3	0.002168	25	3868	3	788.5
True	B	9	0	0	26	17	747	1006	708	-140	[718,980,783,1036]	158.7	0.9386	22	20	396	0.1518	35	0.01969	13	0.03808	1	0.001016	35	2800	1	2900
True	B	9	0	0	26	18	277	472	568	19	[249,438,308,506]	152.8	0.9893	23	21	583	0.1329	56	0.03271	26	0.03325	2	0.001681	56	5426	2	1320
True	B	9	0	0	26	19	252	541	559	-1	[221,502,284,580]	158.3	0.968	24	22	658	0.1535	62	0.03497	26	0.03142	2	0.001195	62	4489	2	1610
True	B	9	0	0	26	20	994	600	782	-17	[959,549,1033,637]	169.4	0.9823	25	23	440	0.1587	40	0.02107	36	0.009787	3	0.001497	40	4082	3	1031
True	B	9	0	0	26	21	114	632	517	-30	[79,592,148,694]	196.3	0.8761	26	24	471	0.154	41	0.01864	113	0.0928	9	0.005169	41	3554	9	2164
True	B	9	0	0	26	22	927	651	763	-36	[883,604,977,716]	251.6	0.8946	27	25	816	0.1481	72	0.02555	36	0.03043	3	0.0008795	72	4387	3	2960
True	B	9	0	0	26	23	1006	677	786	-40	[974,626,1041,727]	192.3	0.9921	28	26	514	0.1337	47	0.02182	91	0.06022	7	0.003772	47	3708	7	1451
True	B	9	0	0	26	24	549	683	648	-43	[503,649,582,716]	162.9	0.9605	29	27	523	0.1241	52	0.02849	38	0.02028	3	0.001562	52	5190	3	975.4
True	B	9	0	0	26	25	987	735	779	-58	[947,692,1026,782]	217	1.002	30	28	688	0.1404	61	0.02509	82	0.05506	7	0.00359	61	4033	7	1699
True	B	9	0	0	26	26	44	826	498	-86	[7,781,82,864]	151.5	0.9678	32	30	481	0.1481	45	0.02652	39	0.03938	3	0.001911	45	4873	3	1214
True	B	9	0	0	26	27	591	837	661	-88	[561,796,621,874]	145.2	0.9446	33	31	493	0.1479	44	0.02704	0	0	0	0	44	4483	0	NaN
True	B	9	0	0	26	28	638	871	676	-100	[598,835,679,914]	223.1	0.9624	34	32	738	0.1414	65	0.02601	0	0	0	0	65	4890	0	NaN
True	B	9	0	0	26	29	842	871	737	-100	[807,840,886,904]	180.7	0.9088	35	33	339	0.139	28	0.01383	52	0.0526	4	0.002941	28	2437	4	1213
True	B	9	0	0	26	30	807	991	728	-136	[774,961,868,1030]	178.1	0.9642	36	34	538	0.1713	48	0.02406	26	0.006822	3	0.001739	48	3017	3	985.8
True	B	9	0	0	26	31	908	1033	756	-147	[869,996,945,1069]	155.3	0.9985	37	35	442	0.1377	41	0.02356	0	0	0	0	41	2988	0	NaN
True	B	9	0	0	27	1	296	114	1218	127	[260,85,328,147]	134.4	0.9861	1	1	500	0.1536	47	0.03121	37	0.02823	3	0.001657	47	4785	3	1437
True	B	9	0	0	27	2	278	208	1214	99	[254,182,305,236]	95.7	0.9777	2	2	346	0.1468	34	0.03172	20	0.01843	2	0.001815	34	4144	2	2336
True	B	9	0	0	27	3	588	232	1306	92	[558,182,613,273]	150.6	0.9485	3	3	465	0.1566	42	0.0249	26	0.03999	2	0.001018	42	3880	2	1810
True	B	9	0	0	27	4	632	243	1318	91	[605,153,657,300]	133.6	0.9477	4	4	448	0.2107	39	0.02607	13	0.01828	1	0.0004403	39	3568	1	2774
True	B	9	0	0	27	5	742	260	1353	83	[720,231,779,301]	95.25	0.9061	5	5	320	0.1692	29	0.02718	26	0.009182	2	0.001591	29	3969	2	596.7
True	B	9	0	0	27	6	734	432	1348	26	[692,387,764,538]	174.4	0.9383	6	6	472	0.1948	41	0.02098	0	0	0	0	41	3437	0	NaN
True	B	9	0	0	27	7	768	681	1360	-40	[742,615,795,723]	163.9	0.9485	7	7	384	0.189	33	0.01797	65	0.06179	5	0.003358	33	2771	5	1380
True	B	9	0	0	27	8	605	769	1313	-70	[572,742,663,807]	121.1	0.9032	8	8	470	0.1658	44	0.03245	105	0.0856	9	0.004668	44	5028	9	1897
True	B	9	0	0	27	9	705	774	1342	-70	[664,721,736,827]	92.93	0.9932	9	9	215	0.204	18	0.01729	0	0	0	0	18	3136	0	NaN
True	B	9	0	0	27	10	635	822	1323	-83	[607,784,674,853]	91.06	0.8151	10	10	65	0.1419	5	0.004902	244	0.1653	20	0.01127	5	2780	20	2233
True	B	9	0	0	27	11	870	834	1390	-90	[823,802,920,877]	105.1	0.8956	11	11	304	0.1383	29	0.02464	39	0.003851	4	0.001677	29	5146	4	428.6
True	B	9	0	0	27	12	494	860	1279	-92	[460,785,524,892]	167	0.8945	12	12	610	0.1948	54	0.02886	13	0.02437	1	0.0004333	54	4007	1	2868
True	B	9	0	0	27	13	561	855	1298	-95	[521,807,589,903]	161	0.917	13	13	568	0.1578	54	0.02993	0	0	0	0	54	4361	0	NaN
True	B	9	0	0	27	14	420	884	1255	-102	[374,850,451,915]	135.4	0.947	14	14	422	0.1577	37	0.02439	13	0.002751	1	0.0006002	37	4745	1	429.5
True	B	9	0	0	27	15	610	882	1314	-102	[581,849,646,912]	136.4	0.9427	15	15	355	0.2029	31	0.02029	28	0.01001	3	0.002457	31	3456	3	710
True	B	9	0	0	27	16	892	925	1398	-114	[862,885,924,959]	121.3	0.9644	16	16	401	0.163	35	0.02575	50	0.08948	4	0.002801	35	4316	4	2540
True	B	9	0	0	27	17	638	121	1322	124	[610,89,679,161]	181.9	0.954	17	17	532	0.1554	49	0.02404	60	0.07258	5	0.003298	49	4294	5	1712
True	B	9	0	0	27	18	815	443	1374	23	[782,405,852,516]	180	0.9775	18	18	592	0.1774	52	0.02579	12	0.0007903	1	0.0002855	52	3772	1	360
True	B	9	0	0	27	19	769	565	1362	-9	[731,524,807,627]	161.2	0.9946	19	19	421	0.1829	37	0.02049	58	0.03209	5	0.002014	37	3411	5	1028
True	B	9	0	0	28	1	224	124	874	-198	[198,93,251,153]	120	0.986	2	2	469	0.1518	44	0.03274	0	0	0	0	44	3544	0	NaN
True	B	9	0	0	28	2	207	318	868	-259	[177,290,229,357]	103.7	0.9621	3	3	303	0.1241	30	0.02582	39	0.06707	3	0.002793	30	5236	3	4319
True	B	9	0	0	28	3	519	594	963	-339	[494,566,543,627]	97.22	0.9557	6	5	289	0.1469	27	0.02479	26	0.06667	2	0.002601	27	4631	2	1691
True	B	9	0	0	28	4	533	647	968	-357	[516,626,559,676]	72.58	0.8789	7	6	223	0.1562	20	0.0246	26	0.1583	2	0.003215	20	4566	2	3907
True	B	9	0	0	28	5	87	673	833	-363	[63,645,120,702]	110.1	0.9381	8	7	395	0.122	38	0.03082	26	0.1033	2	0.00314	38	5342	2	2059
True	B	9	0	0	28	6	111	708	841	-373	[75,674,139,738]	114.3	0.9316	9	8	450	0.07406	42	0.03281	39	0.04711	3	0.002157	42	8904	3	2744
True	B	9	0	0	28	7	40	777	820	-394	[13,745,77,807]	118.4	0.9419	10	9	561	0.09992	58	0.04374	45	0.02714	4	0.002626	58	5783	4	1381
True	B	9	0	0	28	8	82	831	832	-409	[52,794,112,861]	136.7	0.8967	11	10	517	0.1204	49	0.03201	78	0.0686	6	0.00406	49	5424	6	1801
True	B	9	0	0	28	9	199	836	868	-413	[171,799,226,881]	131.4	0.9473	12	11	562	0.09888	56	0.03804	76	0.02894	6	0.003207	56	5591	6	1050
True	B	9	0	0	28	10	172	890	860	-429	[141,860,217,924]	87.49	0.9082	13	12	107	0.05507	9	0.009184	39	0.0239	3	0.001382	9	2528	3	1600
True	B	9	0	0	28	11	596	53	985	-177	[558,11,632,88]	133.9	1.002	16	15	396	0.1552	35	0.02333	0	0	0	0	35	2932	0	NaN
True	B	9	0	0	28	12	238	70	879	-183	[207,40,271,99]	158	0.9832	17	16	692	0.1472	67	0.03785	39	0.06414	3	0.003003	67	4344	3	1828
True	B	9	0	0	28	13	206	170	877	-219	[176,134,288,249]	208.3	0.7777	18	17	731	0.1472	67	0.02872	96	0.01767	9	0.00209	67	4281	9	1002
True	B	9	0	0	28	14	184	240	866	-234	[146,205,245,275]	246.7	0.8585	19	18	791	0.1408	71	0.02569	44	0.00229	4	0.001766	71	4589	4	588.4
True	B	9	0	0	28	15	155	326	854	-259	[122,297,185,358]	170.2	0.9771	20	19	622	0.1424	58	0.03041	38	0.01333	3	0.002979	58	4601	3	1386
True	B	9	0	0	28	16	471	549	949	-326	[442,517,507,586]	158.1	0.9595	21	20	494	0.1457	44	0.02484	52	0.0907	4	0.002786	44	3722	4	2173
True	B	9	0	0	28	17	42	645	820	-355	[1,603,75,684]	176.7	1.006	22	21	726	0.1242	71	0.03588	108	0.07134	9	0.005784	71	6078	9	1063
True	B	9	0	0	28	18	36	710	819	-375	[1,678,78,748]	164.3	0.9425	23	22	678	0.142	64	0.03476	116	0.05808	10	0.005893	64	5068	10	2023
True	B	9	0	0	28	19	206	938	868	-442	[162,904,237,967]	184.7	0.9479	24	23	791	0.1101	80	0.03867	25	0.05268	2	0.001942	80	6152	2	2332
True	B	9	0	0	28	20	114	968	838	-451	[44,929,153,1019]	176.2	0.9887	25	24	797	0.131	78	0.03951	91	0.05704	7	0.001513	78	4945	7	3542
True	B	9	0	0	28	21	157	1017	857	-465	[124,989,206,1046]	151.5	0.976	26	25	618	0.1468	58	0.03418	49	0.06395	4	0.002452	58	4586	4	1940
True	B	9	0	0	29	1	159	47	205	-175	[88,7,197,85]	144.1	0.9814	2	2	580	0.1468	54	0.03346	13	0.006183	1	0.0002911	54	3854	1	1325
True	B	9	0	0	29	2	119	88	196	-188	[83,57,155,123]	96.77	0.9053	3	3	276	0.125	26	0.02399	13	0.01651	1	0.0004619	26	2848	1	2209
True	B	9	0	0	29	3	22	164	167	-212	[1,112,46,212]	111.2	0.9438	4	4	438	0.1695	40	0.0321	0	0	0	0	40	3090	0	NaN
True	B	9	0	0	29	4	80	165	185	-212	[35,121,120,212]	135	0.937	5	5	397	0.1395	36	0.02381	26	0.01539	2	0.0005693	36	3593	2	1655
True	B	9	0	0	29	5	230	220	231	-228	[196,191,271,250]	123.4	0.9647	6	6	403	0.1426	39	0.02822	26	0.051	2	0.001477	39	3734	2	1960
True	B	9	0	0	29	6	101	227	193	-231	[64,196,141,264]	121.5	0.9474	7	7	473	0.1376	44	0.03233	13	0.009717	1	0.0005627	44	4110	1	1003
True	B	9	0	0	29	7	177	248	212	-236	[127,216,215,277]	112.2	0.9673	9	9	403	0.148	39	0.03103	26	0.03369	2	0.0009264	39	3799	2	2019
True	B	9	0	0	29	8	258	256	240	-239	[234,221,285,296]	113.1	0.9623	10	10	393	0.1628	38	0.02999	11	0.0007256	1	0.000846	38	3502	1	386.3
True	B	9	0	0	29	9	310	265	254	-241	[276,223,345,304]	153.4	0.8512	11	11	501	0.1345	47	0.02736	25	0.001997	2	0.0008421	47	4602	2	442.7
True	B	9	0	0	29	10	91	284	189	-247	[61,248,126,316]	113.5	0.9456	12	12	366	0.1372	33	0.02596	39	0.05865	3	0.001786	33	3623	3	2376
True	B	9	0	0	29	11	41	305	169	-264	[1,255,67,482]	113.1	0.9349	13	13	347	0.1529	31	0.02447	26	0.009246	2	0.0005779	31	3232	2	1246
True	B	9	0	0	29	12	408	310	283	-256	[368,278,445,349]	144.2	0.9173	14	14	518	0.1635	47	0.0291	0	0	0	0	47	4496	0	NaN
True	B	9	0	0	29	13	347	309	263	-255	[296,286,384,331]	80.17	0.8267	15	15	336	0.1571	31	0.03452	12	0.001367	1	0.0006349	31	4088	1	1162
True	B	9	0	0	29	14	264	329	240	-262	[230,293,299,376]	154.3	0.8875	16	16	394	0.1468	35	0.02025	39	0.07253	3	0.001499	35	3649	3	2996
True	B	9	0	0	29	15	454	374	297	-274	[412,332,489,409]	172.2	0.9173	17	17	559	0.1535	51	0.02644	25	0.003137	2	0.0008861	51	4309	2	403.3
True	B	9	0	0	29	16	132	365	201	-271	[88,334,172,398]	104.5	0.9193	18	18	301	0.1452	28	0.02391	20	0.001627	2	0.0008489	28	3313	2	758
True	B	9	0	0	29	17	189	390	220	-280	[153,359,236,429]	126.4	0.9604	19	19	352	0.1803	31	0.02189	26	0.01479	2	0.0007701	31	3968	2	1125
True	B	9	0	0	29	18	271	414	241	-285	[228,375,304,453]	141.7	0.9311	20	20	397	0.1579	35	0.02205	9	0.0001808	1	0.0003804	35	3404	1	274.6
True	B	9	0	0	29	19	365	601	273	-342	[344,577,398,628]	92.93	0.9509	21	21	261	0.1954	22	0.02113	52	0.1248	4	0.005236	22	3595	4	2212
True	B	9	0	0	29	20	435	639	290	-352	[386,611,462,673]	155.9	0.9595	22	22	528	0.1481	49	0.02806	39	0.04813	3	0.002256	49	3902	3	1667
True	B	9	0	0	29	21	385	668	279	-362	[357,642,426,697]	79.18	1.005	23	23	227	0.1977	20	0.02255	39	0.06017	3	0.001556	20	3807	3	2468
True	B	9	0	0	29	22	561	721	331	-379	[540,697,587,760]	62.22	0.9414	24	24	203	0.1948	18	0.02583	18	0.002071	2	0.001629	18	4475	2	466.9
True	B	9	0	0	29	23	409	729	284	-380	[378,704,440,762]	151.1	0.8702	25	25	614	0.1566	58	0.03426	24	0.04596	2	0.003407	58	4857	2	2797
True	B	9	0	0	29	24	453	755	298	-386	[434,726,486,779]	45.8	0.8762	26	26	84	0.1234	7	0.01365	13	0.001081	1	0.0009099	7	3462	1	337.8
True	B	9	0	0	29	25	424	768	288	-391	[400,742,448,787]	52.85	0.79	27	27	51	0.004978	5	0.008446	0	0	0	0	5	699.2	0	NaN
True	B	9	0	0	29	26	608	786	344	-397	[578,751,639,819]	146	0.9319	28	28	517	0.1538	51	0.03117	26	0.02447	2	0.001413	51	4889	2	1133
True	B	9	0	0	29	27	774	858	393	-419	[737,835,803,897]	113.6	0.9199	29	29	297	0.1893	25	0.01964	0	0	0	0	25	3698	0	NaN
True	B	9	0	0	29	28	729	866	381	-422	[704,838,772,901]	102.3	0.9167	30	30	323	0.1491	30	0.02618	13	0.03652	1	0.0006146	30	4751	1	3390
True	B	9	0	0	29	29	596	889	341	-428	[545,857,657,926]	178.4	0.9291	31	31	572	0.1288	55	0.02753	70	0.06148	6	0.002953	55	4510	6	1517
True	B	9	0	0	29	30	983	917	457	-437	[945,885,1032,956]	163	0.9608	32	32	584	0.1392	53	0.02903	0	0	0	0	53	3979	0	NaN
True	B	9	0	0	29	31	644	924	354	-438	[596,896,692,954]	169.1	0.958	33	33	699	0.1393	67	0.03537	51	0.05951	4	0.002594	67	4973	4	1278
True	B	9	0	0	29	32	427	968	293	-453	[404,943,469,1009]	77.67	0.8557	34	34	212	0.2114	18	0.02069	26	0.01198	2	0.001967	18	2638	2	574.1
True	B	9	0	0	29	33	565	998	329	-461	[515,968,601,1040]	124.4	0.9879	35	35	406	0.152	38	0.02726	26	0.02445	2	0.0008741	38	3478	2	1824
True	B	9	0	0	29	34	959	1003	451	-464	[935,969,1003,1040]	96.23	0.9305	36	36	357	0.1453	33	0.03061	38	0.003711	3	0.001843	33	4757	3	354.5
True	B	9	0	0	29	35	421	1030	288	-470	[372,998,470,1068]	144	0.9479	37	37	378	0.1514	33	0.02046	0	0	0	0	33	3001	0	NaN
True	B	9	0	0	29	36	515	1052	316	-476	[487,1022,541,1078]	116	0.897	38	38	295	0.1553	26	0.02002	0	0	0	0	26	3370	0	NaN
True	B	9	0	0	29	37	68	47	182	-175	[34,1,106,86]	160.3	0.9441	41	41	563	0.133	54	0.03007	13	0.001259	1	0.0004591	54	3007	1	296.6
True	B	9	0	0	29	38	37	101	173	-193	[1,62,80,149]	132.4	0.9686	42	42	362	0.1654	31	0.0209	0	0	0	0	31	2426	0	NaN
True	B	9	0	0	29	39	208	322	222	-258	[163,278,237,360]	126.9	1.008	43	43	429	0.1397	42	0.02956	38	0.0322	3	0.001264	42	3539	3	1431
True	B	9	0	0	29	40	73	344	182	-266	[22,313,108,382]	170.7	0.9337	44	44	533	0.1388	50	0.02615	25	0.02547	2	0.00114	50	2972	2	1859
True	B	9	0	0	29	41	131	590	200	-339	[73,540,185,641]	190.2	0.9641	45	45	768	0.1493	73	0.03426	59	0.01965	5	0.0008503	73	4603	5	2129
True	B	9	0	0	29	42	116	666	197	-362	[84,634,153,717]	161	0.9616	46	46	524	0.1824	44	0.0244	49	0.01216	4	0.002198	44	3148	4	513.8
True	B	9	0	0	29	43	75	699	184	-372	[37,664,111,742]	141.8	0.9896	47	47	432	0.1759	38	0.02393	26	0.007815	2	0.001133	38	3386	2	516
True	B	9	0	0	29	44	489	721	307	-379	[440,694,516,767]	200.3	0.7741	48	48	753	0.1231	76	0.03387	52	0.06951	4	0.003887	76	4891	4	2053
True	B	9	0	0	29	45	360	756	268	-385	[314,701,404,791]	179.1	0.7334	49	49	649	0.1323	61	0.03041	62	0.01596	5	0.001647	61	4911	5	1409
True	B	9	0	0	29	46	248	761	235	-389	[206,733,281,794]	157.6	0.9816	50	50	524	0.159	49	0.02776	22	0.03077	2	0.001505	49	3886	2	1879
True	B	9	0	0	29	47	544	770	324	-389	[514,712,582,800]	176.4	0.8011	51	51	586	0.1577	55	0.02783	107	0.0961	9	0.006156	55	4087	9	2166
True	B	9	0	0	29	48	114	777	196	-394	[72,741,156,815]	145.4	0.9867	52	52	401	0.1634	34	0.02087	30	0.004333	3	0.001203	34	2897	3	623.8
True	B	9	0	0	29	49	202	803	222	-402	[157,763,247,844]	175.1	0.9055	53	53	596	0.1411	54	0.02754	72	0.03497	6	0.002073	54	4605	6	1540
True	B	9	0	0	29	50	564	840	329	-412	[513,803,611,875]	178.6	0.9886	54	54	655	0.1581	60	0.02999	52	0.02112	4	0.001375	60	4899	4	954.8
True	B	9	0	0	29	51	670	856	363	-419	[640,829,710,890]	167.2	0.9595	55	55	514	0.1343	48	0.02563	26	0.06561	2	0.001718	48	4745	2	2792
True	B	9	0	0	29	52	825	876	409	-424	[783,839,863,926]	187.6	0.9492	56	56	479	0.1648	42	0.01999	52	0.02085	5	0.002607	42	3810	5	859.6
True	B	9	0	0	29	53	375	959	273	-448	[306,899,425,1002]	322.5	0.7916	57	57	871	0.1664	77	0.02131	100	0.0634	9	0.005856	77	2768	9	1103
True	B	9	0	0	29	54	740	940	381	-441	[684,898,771,977]	147	0.9759	58	58	552	0.1428	52	0.03157	113	0.0472	9	0.004202	52	5348	9	992.3
True	B	9	0	0	29	55	508	964	314	-452	[479,942,536,1003]	166.3	0.9958	59	59	575	0.1364	57	0.0306	26	0.1819	2	0.005634	57	3625	2	3779
True	B	9	0	0	29	56	989	976	454	-447	[914,887,1031,1011]	190.8	0.9309	60	60	690	0.1428	61	0.02854	13	0.001162	1	0.0003541	61	4168	1	453.2
True	B	9	0	0	29	57	309	998	255	-461	[275,955,347,1042]	154.8	0.9881	61	61	514	0.1518	47	0.02711	39	0.01856	3	0.00113	47	3918	3	1084
True	B	9	0	0	30	1	444	580	-352	-334	[415,548,472,603]	88.82	0.9163	2	1	235	0.1817	21	0.02111	38	0.01381	3	0.00304	21	4310	3	564.8
True	B	9	0	0	30	2	461	624	-347	-348	[421,598,491,649]	88.02	0.865	3	2	334	0.1469	32	0.03245	0	0	0	0	32	5405	0	NaN
True	B	9	0	0	30	3	968	992	-194	-458	[933,937,1007,1037]	141	0.8834	4	3	497	0.1353	48	0.0304	13	0.0218	1	0.0003182	48	4324	1	3580
True	B	9	0	0	30	4	402	599	-364	-340	[371,551,434,630]	161	0.9694	7	5	404	0.1687	36	0.01997	0	0	0	0	36	4469	0	NaN
True	B	9	0	0	30	5	953	768	-199	-392	[915,727,992,813]	179.8	0.9846	8	6	460	0.1641	42	0.02085	26	0.005202	2	0.0007908	42	4112	2	426.9
True	B	9	0	0	31	1	757	54	-903	-177	[727,24,799,86]	130.4	0.9779	4	3	333	0.1769	28	0.01917	0	0	0	0	28	3284	0	NaN
True	B	9	0	0	31	2	942	92	-848	-188	[913,57,974,121]	109.8	0.9102	5	4	282	0.1477	25	0.02033	0	0	0	0	25	3669	0	NaN
True	B	9	0	0	31	3	1000	103	-832	-192	[964,64,1035,143]	146.6	0.9659	6	5	399	0.1549	35	0.02132	13	0.01846	1	0.0005438	35	3128	1	1475
True	B	9	0	0	31	4	227	159	-1060	-210	[199,136,281,191]	129.8	0.9576	7	6	388	0.1732	35	0.02407	48	0.05712	4	0.00315	35	4335	4	2228
True	B	9	0	0	31	5	103	190	-1100	-218	[64,155,130,220]	109.1	0.9611	8	7	329	0.1593	29	0.02373	10	0.000294	1	0.0006807	29	4315	1	306
True	B	9	0	0	31	6	268	194	-1049	-218	[237,153,302,220]	113.8	0.9753	9	8	312	0.1709	28	0.02196	13	0.05997	1	0.0007911	28	3693	1	4422
True	B	9	0	0	31	7	967	248	-841	-235	[931,211,1006,275]	102.9	0.8848	10	9	382	0.1393	36	0.03122	11	0.001632	1	0.0004946	36	4831	1	939.9
True	B	9	0	0	31	8	247	241	-1056	-234	[222,211,272,269]	88.29	0.975	11	10	298	0.1879	26	0.02629	13	0.02894	1	0.0008097	26	4046	1	3045
True	B	9	0	0	31	9	929	295	-852	-252	[891,257,965,350]	148.1	0.9018	12	11	509	0.1611	48	0.02893	51	0.03003	4	0.001464	48	4365	4	1237
True	B	9	0	0	31	10	864	374	-872	-274	[837,335,891,421]	93.2	0.9132	13	12	250	0.1387	22	0.02107	13	0.003551	1	0.000774	22	3848	1	369.1
True	B	9	0	0	31	11	887	404	-864	-279	[864,342,910,430]	133.8	0.8784	14	13	389	0.1647	36	0.02402	0	0	0	0	36	4083	0	NaN
True	B	9	0	0	31	12	928	381	-853	-275	[904,344,952,418]	79.99	0.9203	15	14	248	0.1671	21	0.02344	77	0.1245	6	0.003681	21	4146	6	2781
True	B	9	0	0	31	13	953	414	-846	-286	[913,386,980,447]	124.1	0.968	16	15	488	0.1578	45	0.03237	24	0.03766	2	0.002	45	4913	2	1195
True	B	9	0	0	31	14	195	431	-1071	-291	[164,404,230,461]	97.48	0.9674	17	16	346	0.1556	32	0.0293	13	0.03707	1	0.000625	32	4796	1	3769
True	B	9	0	0	31	15	834	443	-882	-297	[796,406,865,510]	153.8	0.9218	18	17	455	0.1428	43	0.02496	13	0.009583	1	0.0004664	43	4351	1	1459
True	B	9	0	0	31	16	900	446	-862	-296	[869,420,924,483]	91.15	0.9204	19	18	184	0.158	16	0.01567	31	0.06116	3	0.002768	16	4353	3	2598
True	B	9	0	0	31	17	873	490	-872	-308	[819,465,909,516]	118.4	0.9078	20	19	367	0.1714	34	0.02564	13	0.003884	1	0.0005824	34	5100	1	557.7
True	B	9	0	0	31	18	64	578	-1112	-335	[32,555,85,602]	59.72	0.9564	21	20	94	0.1431	8	0.01196	65	0.09469	5	0.004223	8	3679	5	1773
True	B	9	0	0	31	19	103	619	-1099	-347	[78,594,129,643]	56.87	0.8581	22	21	107	0.1661	9	0.01413	47	0.06249	4	0.003241	9	2417	4	1639
True	B	9	0	0	31	20	108	664	-1097	-361	[74,640,138,693]	89.9	1.008	23	22	271	0.1471	25	0.02483	13	0.004217	1	0.0009671	25	4245	1	383.7
True	B	9	0	0	31	21	52	686	-1114	-367	[6,659,91,716]	133.2	0.9061	24	23	430	0.1428	40	0.02681	65	0.02189	5	0.002493	40	4563	5	807.1
True	B	9	0	0	31	22	989	688	-837	-371	[949,661,1018,761]	97.04	0.9963	25	24	313	0.1624	28	0.02576	26	0.01201	2	0.0009341	28	3569	2	1148
True	B	9	0	0	31	23	113	709	-1096	-373	[83,682,141,737]	62.49	0.9822	27	25	215	0.1774	19	0.02714	38	0.01808	3	0.002049	19	4815	3	890.1
True	B	9	0	0	31	24	1023	715	-824	-375	[987,683,1048,744]	103.4	0.9504	28	26	336	0.1648	32	0.02763	26	0.04288	2	0.001899	32	4310	2	1812
True	B	9	0	0	31	25	1054	742	-815	-384	[1032,724,1078,766]	57.67	0.9243	29	27	97	0.1877	9	0.01393	26	0.1115	2	0.002911	9	2566	2	3251
True	B	9	0	0	31	26	201	757	-1070	-388	[171,729,228,788]	93.65	0.9655	30	28	272	0.1993	23	0.02193	0	0	0	0	23	4486	0	NaN
True	B	9	0	0	31	27	255	761	-1054	-388	[225,734,282,787]	96.5	0.9224	31	29	238	0.1644	21	0.01943	26	0.0135	2	0.001901	21	4401	2	1073
True	B	9	0	0	31	28	1002	761	-830	-389	[972,722,1038,797]	70.79	0.866	32	30	153	0.1155	14	0.01765	39	0.02257	3	0.001285	14	2850	3	1577
True	B	9	0	0	31	29	440	811	-999	-404	[409,779,466,849]	87.57	0.8536	34	32	295	0.1596	27	0.02752	13	0.05842	1	0.0008532	27	4479	1	3907
True	B	9	0	0	31	30	378	800	-1014	-401	[357,782,422,822]	106.1	0.9554	35	33	352	0.1907	31	0.02607	0	0	0	0	31	3570	0	NaN
True	B	9	0	0	31	31	233	803	-1059	-402	[205,772,272,828]	146.5	0.8818	36	34	562	0.1657	52	0.03169	31	0.0447	3	0.002885	52	4122	3	2968
True	B	9	0	0	31	32	1031	822	-823	-406	[993,795,1062,851]	92.22	0.9673	37	35	342	0.1086	35	0.03388	13	0.03385	1	0.0007524	35	5391	1	3512
True	B	9	0	0	31	33	412	838	-1009	-412	[370,807,436,867]	114.2	0.8971	38	36	365	0.1623	33	0.0258	13	0.05537	1	0.001011	33	4598	1	4054
True	B	9	0	0	31	34	987	838	-835	-412	[954,809,1013,870]	94.98	0.8605	39	37	258	0.1453	24	0.02256	39	0.04712	3	0.002547	24	4251	3	1544
True	B	9	0	0	31	35	952	851	-846	-417	[926,820,982,885]	65.35	0.9321	40	38	178	0.1161	19	0.02596	10	0.0002697	1	0.0006289	19	4787	1	417.8
True	B	9	0	0	31	36	1059	851	-814	-416	[1025,824,1078,874]	105.2	0.9599	41	39	328	0.132	31	0.02632	0	0	0	0	31	3591	0	NaN
True	B	9	0	0	31	37	576	880	-957	-424	[542,852,619,905]	105.9	0.8743	42	40	266	0.1659	23	0.01939	60	0.04198	5	0.003215	23	4723	5	887.9
True	B	9	0	0	31	38	525	891	-973	-427	[493,855,551,921]	128.9	0.9453	43	41	417	0.1697	38	0.02632	39	0.006081	3	0.002308	38	4251	3	419.9
True	B	9	0	0	31	39	1046	893	-818	-426	[1005,849,1078,915]	96.68	0.933	44	42	360	0.1579	32	0.02955	26	0.006595	2	0.001161	32	4114	2	861.1
True	B	9	0	0	31	40	303	897	-1039	-430	[266,858,347,926]	92.13	0.9361	45	43	283	0.117	28	0.02713	26	0.03217	2	0.001087	28	5596	2	1664
True	B	9	0	0	31	41	978	897	-837	-430	[946,867,1015,937]	88.47	0.9045	46	44	203	0.144	17	0.01715	13	0.01296	1	0.0004871	17	3640	1	2055
True	B	9	0	0	31	42	377	923	-1016	-437	[353,879,403,955]	114	0.9667	47	45	362	0.1635	34	0.02662	13	0.03716	1	0.0008032	34	5154	1	2933
True	B	9	0	0	31	43	1027	926	-824	-439	[992,894,1052,965]	102.7	0.8273	48	46	219	0.1407	18	0.01565	0	0	0	0	18	3190	0	NaN
True	B	9	0	0	31	44	513	941	-977	-442	[482,905,541,971]	101.7	0.951	50	47	361	0.1651	34	0.02985	0	0	0	0	34	3627	0	NaN
True	B	9	0	0	31	45	326	944	-1031	-444	[300,921,361,973]	116.5	0.9246	51	48	350	0.1635	30	0.02299	0	0	0	0	30	5076	0	NaN
True	B	9	0	0	31	46	470	961	-989	-449	[443,937,503,988]	104.2	0.9547	52	49	418	0.1731	37	0.03171	0	0	0	0	37	4901	0	NaN
True	B	9	0	0	31	47	335	990	-1030	-460	[308,965,362,1039]	102.3	0.9642	53	50	265	0.146	24	0.02094	32	0.0009254	4	0.002543	24	4555	4	381.3
True	B	9	0	0	31	48	382	999	-1016	-458	[355,954,407,1027]	95.16	0.9539	54	51	326	0.1482	31	0.02908	9	0.0002856	1	0.0006906	31	4246	1	361.9
True	B	9	0	0	31	49	356	1045	-1024	-474	[315,1016,396,1073]	125.2	0.9823	55	52	427	0.1844	37	0.02637	0	0	0	0	37	3933	0	NaN
True	B	9	0	0	31	50	875	106	-868	-194	[830,59,921,145]	162.7	0.9369	58	55	611	0.1391	58	0.03183	36	0.02375	3	0.0009885	58	4295	3	1601
True	B	9	0	0	31	51	950	152	-846	-207	[911,115,988,192]	184.4	0.9762	59	56	501	0.157	42	0.02033	73	0.05319	6	0.002721	42	3485	6	1579
True	B	9	0	0	31	52	31	178	-1121	-215	[1,148,67,208]	141	1.004	60	57	461	0.1363	44	0.02787	24	0.002089	2	0.001429	44	3644	2	323.3
True	B	9	0	0	31	53	986	198	-837	-221	[930,170,1024,229]	159.2	0.9327	61	58	593	0.1556	53	0.02973	30	0.01571	3	0.001842	53	3850	3	764.4
True	B	9	0	0	31	54	49	234	-1115	-231	[7,182,95,273]	159	0.9626	62	59	438	0.1381	40	0.02246	13	0.02454	1	0.0003028	40	3962	1	3941
True	B	9	0	0	31	55	323	813	-1033	-405	[293,778,359,845]	152.4	0.9394	63	60	389	0.1534	34	0.01992	26	0.04504	2	0.001298	34	5447	2	2308
True	B	9	0	0	31	56	430	1017	-1002	-467	[385,980,464,1059]	147	0.9594	64	61	479	0.1559	43	0.02611	39	0.02172	4	0.001786	43	4067	4	1153
True	B	9	0	0	32	1	272	28	-1370	-492	[237,1,334,61]	93.2	0.9525	1	1	302	0.09929	32	0.03065	69	0.05889	6	0.002537	32	3774	6	2780
True	B	9	0	0	32	2	366	64	-1343	-503	[345,41,391,86]	105.3	0.932	2	2	326	0.1637	28	0.02375	25	0.07974	2	0.005	28	4507	2	1893
True	B	9	0	0	32	3	220	55	-1388	-501	[192,1,248,112]	76.95	0.8152	3	3	150	0.07627	13	0.01508	13	0.006682	1	0.0002305	13	2271	1	2089
True	B	9	0	0	32	4	411	70	-1330	-505	[383,34,438,98]	95.88	0.948	4	4	270	0.1413	24	0.02235	13	0.007194	1	0.0008065	24	3405	1	611.7
True	B	9	0	0	32	5	463	63	-1315	-505	[433,38,495,106]	104.6	0.9197	5	5	327	0.125	31	0.02645	13	0.02216	1	0.0007485	31	4195	1	2248
True	B	9	0	0	32	6	501	86	-1303	-512	[475,46,525,129]	160.3	0.9752	6	6	501	0.1249	47	0.02617	23	0.02146	2	0.0018	47	4492	2	1230
True	B	9	0	0	32	7	580	85	-1281	-512	[546,51,604,128]	84.36	0.8435	7	7	85	0.01956	8	0.008466	13	0.002083	1	0.0005362	8	1246	1	487.9
True	B	9	0	0	32	8	541	65	-1292	-508	[518,46,568,119]	84.72	0.9412	8	8	210	0.1419	18	0.01897	25	0.03531	2	0.001506	18	5017	2	3241
True	B	9	0	0	32	9	262	103	-1375	-517	[230,77,292,140]	79	0.8835	9	9	178	0.1567	15	0.01695	13	0.02314	1	0.0005365	15	4414	1	2682
True	B	9	0	0	32	10	463	117	-1314	-521	[442,92,490,150]	79.45	0.7812	10	10	201	0.167	17	0.0191	39	0.09218	3	0.003623	17	5240	3	3181
True	B	9	0	0	32	11	223	142	-1387	-528	[193,107,257,186]	64.72	0.9388	11	11	157	0.1125	14	0.01931	0	0	0	0	14	2600	0	NaN
True	B	9	0	0	32	12	422	141	-1328	-528	[388,112,450,177]	101.3	0.93	12	12	357	0.1562	33	0.02907	13	0.03474	1	0.0005718	33	4387	1	3966
True	B	9	0	0	32	13	530	183	-1294	-539	[504,150,555,214]	125.1	0.9124	13	13	281	0.1202	25	0.01784	13	0.02352	1	0.0008453	25	3635	1	3486
True	B	9	0	0	32	14	304	173	-1362	-537	[267,130,342,222]	167.7	0.8395	14	14	340	0.1403	28	0.0149	23	0.001232	2	0.0006483	28	4441	2	816.2
True	B	9	0	0	32	15	386	217	-1338	-551	[361,186,410,259]	138.5	0.9677	15	15	445	0.1141	45	0.02901	52	0.05899	4	0.00341	45	5196	4	1917
True	B	9	0	0	32	16	462	230	-1315	-555	[433,204,489,263]	104.5	0.9864	16	16	320	0.1224	30	0.02562	70	0.06473	6	0.004138	30	5063	6	2308
True	B	9	0	0	32	17	615	271	-1269	-567	[585,242,645,308]	123.7	0.9574	17	17	327	0.1307	29	0.02092	26	0.04822	2	0.001294	29	3987	2	2774
True	B	9	0	0	32	18	313	308	-1359	-574	[283,242,351,349]	105.2	0.9697	18	18	309	0.1564	27	0.02292	24	0.02593	2	0.0008715	27	4836	2	3048
True	B	9	0	0	32	19	381	310	-1340	-577	[339,264,418,348]	141.4	0.9301	19	19	365	0.1372	32	0.0202	26	0.0002259	3	0.001193	32	4649	3	356.7
True	B	9	0	0	32	20	212	299	-1390	-572	[181,237,252,343]	58.03	0.8575	20	20	57	0.08519	5	0.007692	0	0	0	0	5	1920	0	NaN
True	B	9	0	0	32	21	225	371	-1382	-589	[194,277,289,415]	111.1	1.001	21	21	328	0.1065	33	0.02653	23	0.003152	2	0.0003403	33	5783	2	912.6
True	B	9	0	0	32	22	427	343	-1325	-588	[402,317,455,384]	105	0.9307	22	22	351	0.1433	31	0.02636	0	0	0	0	31	4536	0	NaN
True	B	9	0	0	32	23	485	338	-1308	-586	[457,316,510,367]	85.7	0.9476	23	23	211	0.1413	19	0.01979	32	0.03036	3	0.003222	19	4736	3	1093
True	B	9	0	0	32	24	576	358	-1281	-592	[530,327,608,389]	98.64	0.974	24	24	216	0.1283	21	0.019	13	0.02433	1	0.0005086	21	4493	1	3518
True	B	9	0	0	32	25	465	376	-1314	-596	[440,339,492,402]	75.88	0.9455	25	25	168	0.1597	14	0.01647	22	0.01825	2	0.001612	14	3803	2	1319
True	B	9	0	0	32	26	296	399	-1365	-605	[258,363,324,446]	110.4	0.949	26	26	309	0.1531	28	0.02264	0	0	0	0	28	5020	0	NaN
True	B	9	0	0	32	27	346	403	-1349	-606	[322,381,378,432]	84.54	0.8713	27	27	209	0.1801	18	0.01901	49	0.09075	4	0.00363	18	4494	4	2864
True	B	9	0	0	32	28	253	425	-1378	-613	[211,394,284,465]	74.63	0.9145	28	28	144	0.13	12	0.01435	31	0.001069	3	0.001163	12	3782	3	461.1
True	B	9	0	0	32	29	407	437	-1331	-616	[383,413,436,469]	60.17	0.8876	29	29	115	0.1411	10	0.01484	47	0.03033	4	0.002967	10	4313	4	1706
True	B	9	0	0	32	30	362	443	-1345	-618	[333,412,390,475]	85.97	0.9493	30	30	209	0.1568	17	0.01765	0	0	0	0	17	2855	0	NaN
True	B	9	0	0	32	31	213	458	-1390	-620	[182,410,245,487]	123.6	0.7265	31	31	13	0.02276	1	0.0007225	0	0	0	0	1	2887	0	NaN
True	B	9	0	0	32	32	521	481	-1297	-629	[488,446,556,522]	52.31	0.9627	32	32	73	0.06682	6	0.01024	47	0.02304	4	0.001176	6	3108	4	1268
True	B	9	0	0	32	33	256	494	-1381	-635	[196,457,294,558]	82.13	0.8845	33	33	107	0.1064	9	0.009783	75	0.01166	8	0.001609	9	3456	8	1392
True	B	9	0	0	32	34	381	495	-1339	-634	[350,467,407,528]	133	0.9455	34	34	401	0.1459	36	0.02416	39	0.07932	3	0.002828	36	4701	3	3434
True	B	9	0	0	32	35	328	507	-1354	-641	[306,487,353,560]	88.65	0.9772	35	35	242	0.1402	24	0.02417	18	0.02144	2	0.001533	24	4274	2	2636
True	B	9	0	0	32	36	427	528	-1324	-644	[401,500,456,569]	110.3	0.9486	36	36	192	0.1377	16	0.01295	35	0.003427	3	0.002441	16	3925	3	789.5
True	B	9	0	0	32	37	264	548	-1374	-649	[226,513,297,578]	85.25	0.9447	37	37	165	0.1386	15	0.01571	34	0.001531	3	0.001433	15	4734	3	445.1
True	B	9	0	0	32	38	484	531	-1304	-644	[453,491,550,566]	60.7	0.9156	38	38	86	0.06575	8	0.01176	46	0.01744	4	0.001119	8	1957	4	1185
True	B	9	0	0	32	39	387	555	-1337	-650	[351,527,420,584]	136.2	0.873	39	39	288	0.1661	25	0.01638	0	0	0	0	25	4906	0	NaN
True	B	9	0	0	32	40	452	582	-1318	-659	[420,554,490,611]	112.6	0.9787	40	40	246	0.1544	22	0.01745	0	0	0	0	22	4522	0	NaN
True	B	9	0	0	32	41	351	592	-1349	-662	[320,558,382,627]	51.51	0.9134	41	41	60	0.07788	5	0.008666	22	0.0008967	2	0.001024	5	4608	2	353.8
True	B	9	0	0	32	42	227	596	-1384	-665	[194,549,270,654]	69.63	0.8988	42	42	59	0.009428	5	0.00641	23	0.00194	2	0.000462	5	935.6	2	781.6
True	B	9	0	0	32	43	299	602	-1364	-667	[258,562,339,653]	68.2	0.9681	43	43	174	0.1421	15	0.01963	11	0.0001925	1	0.0002524	15	5057	1	386.8
True	B	9	0	0	32	44	438	628	-1321	-674	[412,608,467,654]	75.61	0.8903	44	44	199	0.177	16	0.01889	13	0.06582	1	0.001312	16	3873	1	5009
True	B	9	0	0	32	45	385	641	-1337	-677	[355,607,421,675]	106.3	0.9759	45	45	204	0.1135	16	0.01343	0	0	0	0	16	3222	0	NaN
True	B	9	0	0	32	46	279	667	-1369	-684	[251,634,307,699]	93.82	0.9361	46	46	192	0.1288	17	0.01618	22	0.03383	2	0.001957	17	5243	2	1733
True	B	9	0	0	32	47	324	681	-1357	-689	[290,650,350,716]	126.1	0.9166	47	47	221	0.1164	19	0.01346	61	0.076	5	0.004143	19	4157	5	2372
True	B	9	0	0	32	48	221	667	-1388	-684	[192,601,252,710]	57.58	0.9757	48	48	59	0.09169	5	0.007752	13	0.0004675	1	0.0003675	5	2841	1	509.1
True	B	9	0	0	32	49	490	700	-1306	-693	[457,662,522,732]	115.6	0.9291	49	49	310	0.1599	26	0.02008	20	0.0004376	2	0.0009911	26	4793	2	381.3
True	B	9	0	0	32	50	258	700	-1375	-695	[231,672,296,726]	107.6	0.9533	50	50	295	0.1425	25	0.02075	0	0	0	0	25	4225	0	NaN
True	B	9	0	0	32	51	432	698	-1325	-693	[387,667,467,728]	74.9	0.856	51	51	134	0.1135	12	0.0143	71	0.02483	6	0.002448	12	3618	6	1026
True	B	9	0	0	32	52	455	745	-1317	-708	[428,716,483,787]	110.9	0.9154	52	52	308	0.1619	27	0.02174	0	0	0	0	27	4387	0	NaN
True	B	9	0	0	32	53	405	749	-1330	-710	[377,723,437,790]	94.9	0.9134	53	53	147	0.1235	12	0.01129	19	0.0009299	2	0.00135	12	4388	2	566.5
True	B	9	0	0	32	54	514	754	-1299	-710	[481,728,543,780]	105.7	0.9074	54	54	248	0.1358	23	0.01943	48	0.05315	4	0.003177	23	4670	4	1553
True	B	9	0	0	32	55	251	748	-1381	-706	[194,701,289,777]	42.49	0.9178	55	55	74	0.1494	6	0.01261	8	0.0001858	1	0.0002712	6	4206	1	660.1
True	B	9	0	0	32	56	380	788	-1340	-720	[341,749,416,821]	116.1	0.9493	57	56	339	0.1532	31	0.02383	0	0	0	0	31	4024	0	NaN
True	B	9	0	0	32	57	472	796	-1311	-723	[432,770,503,824]	69.63	0.9207	58	57	178	0.1519	15	0.01923	0	0	0	0	15	3245	0	NaN
True	B	9	0	0	32	58	262	802	-1374	-724	[230,772,295,833]	111.6	0.9738	59	58	250	0.142	21	0.0168	83	0.004662	8	0.004966	21	3862	8	430.8
True	B	9	0	0	32	59	224	829	-1387	-735	[196,804,249,866]	44.01	0.9373	60	59	80	0.1252	7	0.0142	14	0.0003782	2	0.001013	7	3594	2	374.2
True	B	9	0	0	32	60	272	862	-1372	-743	[233,828,305,909]	120.9	0.9106	61	60	241	0.1086	24	0.01773	36	0.001097	5	0.002182	24	3856	5	476.2
True	B	9	0	0	32	61	332	849	-1354	-738	[304,822,358,878]	82.58	0.9592	62	61	195	0.1529	17	0.01838	18	0.01397	2	0.001706	17	4044	2	2603
True	B	9	0	0	32	62	221	899	-1386	-752	[191,863,251,928]	92.48	0.717	63	62	48	0.004071	5	0.004826	0	0	0	0	5	620.4	0	NaN
True	B	9	0	0	32	63	338	903	-1352	-755	[314,873,362,937]	89.81	0.8753	64	63	197	0.1527	16	0.0159	13	0.0324	1	0.0008446	16	4290	1	3132
True	B	9	0	0	32	64	275	941	-1371	-765	[246,899,302,972]	51.78	0.9294	66	64	34	0.00904	3	0.005172	0	0	0	0	3	808	0	NaN
True	B	9	0	0	32	65	323	954	-1355	-770	[295,928,359,984]	112.7	0.97	67	65	278	0.1484	25	0.01979	25	0.02764	2	0.001506	25	3788	2	1390
True	B	9	0	0	32	66	234	960	-1383	-771	[206,925,271,989]	85.08	0.9435	68	66	150	0.1264	13	0.01364	25	0.01637	2	0.001303	13	2499	2	1177
True	B	9	0	0	32	67	262	994	-1374	-782	[237,967,288,1019]	81.15	0.9718	69	67	223	0.1278	20	0.022	22	0.008085	2	0.00188	20	5133	2	554.4
True	B	9	0	0	32	68	310	994	-1361	-781	[284,964,335,1020]	40.8	0.9248	70	68	62	0.02466	5	0.01094	0	0	0	0	5	1093	0	NaN
True	B	9	0	0	32	69	265	1041	-1373	-798	[242,1017,285,1078]	109.1	0.9332	71	69	301	0.1375	27	0.02209	61	0.07452	6	0.008759	27	3959	6	3749
True	B	9	0	0	32	70	222	1044	-1386	-797	[197,1009,251,1078]	78.38	0.8794	72	70	92	0.04829	9	0.01025	24	0.001078	2	0.0009242	9	1022	2	480.5
True	B	9	0	0	32	71	237	204	-1382	-547	[194,147,277,264]	163.3	0.9695	75	73	317	0.1088	28	0.01531	37	0.01735	3	0.0007657	28	2479	3	1975
True	B	9	0	0	32	72	568	295	-1282	-572	[538,249,611,329]	161.4	0.9709	76	74	406	0.1628	34	0.01881	33	0.03301	3	0.001615	34	3992	3	1602
True	B	9	0	0	32	73	389	377	-1336	-598	[353,345,434,410]	169.3	0.998	77	75	477	0.1398	43	0.02267	13	0.04304	1	0.0008613	43	4770	1	3323
True	B	9	0	0	32	74	475	425	-1310	-611	[439,381,514,457]	144.6	0.9835	78	76	352	0.1395	32	0.01975	13	0.02715	1	0.0006262	32	4502	1	3081
True	B	9	0	0	32	75	539	407	-1291	-607	[497,373,589,450]	145.4	0.9953	79	77	374	0.1357	36	0.0221	31	0.001434	3	0.001094	36	5227	3	711.4
True	B	9	0	0	33	1	164	77	-758	-509	[130,40,214,120]	142.2	0.9741	1	1	405	0.1604	37	0.02323	26	0.02283	2	0.0008407	37	3333	2	1404
True	B	9	0	0	33	2	221	367	-740	-594	[192,336,257,399]	99.89	0.8952	2	2	311	0.1626	26	0.02324	0	0	0	0	26	3262	0	NaN
True	B	9	0	0	33	3	268	373	-727	-596	[245,342,291,406]	120.7	0.9098	3	3	351	0.1463	32	0.02367	13	0.05612	1	0.001065	32	4384	1	3667
True	B	9	0	0	33	4	293	424	-720	-612	[253,394,333,460]	140.9	0.8976	4	4	345	0.1914	30	0.01901	50	0.04676	4	0.002446	30	3840	4	1533
True	B	9	0	0	33	5	944	538	-525	-646	[910,503,978,576]	130.7	0.881	5	5	448	0.1402	43	0.02937	51	0.03557	4	0.002132	43	5010	4	1159
True	B	9	0	0	33	6	897	569	-539	-655	[861,541,930,599]	135.4	0.9388	6	6	385	0.175	33	0.02175	39	0.1145	3	0.00275	33	3772	3	2991
True	B	9	0	0	33	7	1022	603	-503	-667	[987,582,1043,646]	74.54	0.8631	7	7	205	0.2034	17	0.02036	52	0.05845	4	0.00318	17	3249	4	1414
True	B	9	0	0	33	8	329	369	-709	-594	[288,305,370,422]	237.2	0.8292	9	9	561	0.1525	48	0.01807	26	0.008052	2	0.0006618	48	4215	2	771
True	B	9	0	0	33	9	761	387	-578	-600	[726,354,808,420]	164.8	0.9746	10	10	533	0.1575	51	0.02763	26	0.03229	2	0.001004	51	5126	2	1941
True	B	9	0	0	33	10	981	578	-514	-659	[948,544,1012,639]	138.5	0.9115	11	11	487	0.1696	42	0.02706	13	0.03327	1	0.0005003	42	5075	1	2935
True	B	9	0	0	34	1	224	891	-95	-752	[188,860,256,935]	101.8	0.9612	4	3	204	0.1243	17	0.01491	50	0.02225	4	0.002186	17	2571	4	606.9
True	B	9	0	0	34	2	167	182	-115	-544	[96,150,214,252]	177.9	0.9418	6	5	446	0.156	40	0.02007	0	0	0	0	40	2496	0	NaN
True	B	9	0	0	34	3	251	938	-86	-766	[199,899,290,982]	177.6	0.913	7	6	443	0.1622	41	0.02061	39	0.03693	3	0.001433	41	4075	3	1733
True	B	9	0	0	35	1	359	1055	-374	-1123	[329,1032,406,1078]	105.6	0.8569	2	2	39	0.04306	3	0.002536	148	0.108	12	0.008368	3	1123	12	1441
True	B	9	0	0	36	1	178	169	-1076	-859	[148,141,213,205]	102.1	0.9343	3	2	264	0.1379	24	0.02098	26	0.01087	2	0.001203	24	3928	2	674.5
True	B	9	0	0	37	1	525	53	-1297	-1146	[488,1,558,96]	148.6	0.9572	2	2	478	0.1253	45	0.02703	33	0.001423	3	0.001191	45	4969	3	521.3
True	B	9	0	0	37	2	460	55	-1315	-1149	[425,19,507,106]	137	0.8906	3	3	419	0.1548	37	0.0241	71	0.04027	6	0.002522	37	4351	6	1355
True	B	9	0	0	37	3	230	70	-1385	-1152	[204,39,257,107]	104.2	0.9547	4	4	199	0.1246	16	0.01371	24	0.02382	2	0.001838	16	2259	2	1243
True	B	9	0	0	37	4	228	123	-1383	-1169	[201,77,280,183]	88.38	0.8945	5	5	137	0.06509	13	0.01313	18	0.0005285	2	0.0005604	13	1346	2	506.3
True	B	9	0	0	37	5	568	112	-1281	-1164	[539,85,619,144]	59.72	0.8101	6	6	18	0.002689	2	0.00299	12	0.001076	1	0.0004458	2	608.7	1	448.4
True	B	9	0	0	37	6	446	126	-1321	-1168	[416,95,474,158]	91.41	0.9624	7	7	260	0.1626	21	0.02051	13	0.02118	1	0.0007294	21	4001	1	1765
True	B	9	0	0	37	7	278	129	-1371	-1170	[244,97,305,164]	61.33	0.8864	8	8	115	0.1133	9	0.0131	24	0.008437	2	0.001138	9	2716	2	1491
True	B	9	0	0	37	8	328	142	-1357	-1175	[287,111,361,188]	106.1	0.9651	9	9	252	0.1386	22	0.0185	18	0.0009486	2	0.0009737	22	4844	2	370.1
True	B	9	0	0	37	9	371	160	-1344	-1179	[332,127,398,195]	65.35	0.8255	10	10	109	0.1074	10	0.01366	29	0.002624	3	0.001615	10	3830	3	534.2
True	B	9	0	0	37	10	277	186	-1370	-1187	[242,155,312,233]	88.02	0.9843	11	11	216	0.1405	19	0.01927	13	0.004986	1	0.0004149	19	4601	1	1242
True	B	9	0	0	37	11	324	215	-1356	-1195	[299,186,359,240]	70.08	0.9242	12	12	163	0.1559	14	0.01783	26	0.03797	2	0.00177	14	3889	2	1726
True	B	9	0	0	37	12	392	230	-1336	-1200	[362,200,422,270]	111	0.9245	13	13	227	0.1227	20	0.01609	26	0.06377	2	0.001346	20	3790	2	3147
True	B	9	0	0	37	13	438	256	-1331	-1214	[344,226,470,324]	103.8	0.9246	15	14	292	0.1665	25	0.0215	22	0.006422	2	0.0004037	25	4133	2	1040
True	B	9	0	0	37	14	565	255	-1283	-1206	[536,225,598,283]	69.27	0.9408	16	15	255	0.1669	23	0.02964	0	0	0	0	23	3718	0	NaN
True	B	9	0	0	37	15	533	282	-1294	-1216	[501,265,561,307]	81.59	0.8269	17	16	256	0.1518	24	0.02626	26	0.06407	2	0.002604	24	5147	2	1853
True	B	9	0	0	37	16	331	326	-1355	-1226	[301,275,356,363]	142.7	0.9042	18	17	475	0.1666	44	0.02753	31	0.009533	3	0.001735	44	4652	3	1235
True	B	9	0	0	37	17	526	321	-1297	-1228	[482,297,555,352]	130.3	0.9345	19	18	387	0.1519	36	0.02466	68	0.137	6	0.005709	36	5469	6	2467
True	B	9	0	0	37	18	257	328	-1377	-1236	[207,256,305,445]	64.01	0.8868	20	19	157	0.1475	13	0.01813	12	4.426e-05	1	8.212e-05	13	3263	1	355
True	B	9	0	0	37	19	632	319	-1265	-1225	[585,286,672,341]	81.86	0.8733	21	20	244	0.1884	21	0.0229	0	0	0	0	21	4311	0	NaN
True	B	9	0	0	37	20	401	357	-1332	-1237	[380,324,428,392]	83.02	0.8998	22	21	183	0.1257	17	0.01828	13	0.02256	1	0.0007524	17	4511	1	1534
True	B	9	0	0	37	21	554	365	-1286	-1239	[525,328,591,396]	117	0.972	23	22	420	0.1558	40	0.03051	0	0	0	0	40	5927	0	NaN
True	B	9	0	0	37	22	450	351	-1319	-1236	[422,320,480,392]	112.2	0.9486	24	23	310	0.1393	28	0.02228	13	0.00315	1	0.0005305	28	5382	1	784.2
True	B	9	0	0	37	23	615	358	-1270	-1239	[576,333,667,405]	124.7	0.9357	25	24	437	0.1851	40	0.02863	8	0.0002378	1	0.0005744	40	4309	1	386.3
True	B	9	0	0	37	24	485	392	-1308	-1248	[460,358,511,429]	83.83	0.8579	26	25	270	0.1421	25	0.02662	21	0.001525	2	0.00137	25	5045	2	660
True	B	9	0	0	37	25	629	397	-1264	-1249	[600,373,663,421]	105	0.9688	27	26	347	0.168	31	0.02636	13	0.01775	1	0.001188	31	4846	1	1265
True	B	9	0	0	37	26	310	417	-1360	-1255	[280,378,338,450]	106.9	0.999	28	27	294	0.1727	25	0.02089	37	0.01022	3	0.001724	25	3930	3	828.4
True	B	9	0	0	37	27	358	409	-1347	-1254	[333,381,377,450]	94.36	0.892	29	28	283	0.1614	25	0.02365	13	0.04642	1	0.001045	25	4880	1	3149
True	B	9	0	0	37	28	429	413	-1326	-1255	[394,383,457,449]	78.83	0.9335	30	29	222	0.1538	19	0.02152	0	0	0	0	19	4598	0	NaN
True	B	9	0	0	37	29	552	453	-1288	-1265	[513,411,590,487]	114.9	0.9171	31	30	370	0.1801	33	0.02564	0	0	0	0	33	4678	0	NaN
True	B	9	0	0	37	30	662	454	-1255	-1268	[636,408,688,505]	101.8	0.9418	32	31	320	0.1533	30	0.02632	13	0.03501	1	0.0005599	30	5252	1	2909
True	B	9	0	0	37	31	292	474	-1366	-1272	[265,440,320,513]	100.4	0.9069	34	32	78	0.09807	6	0.005333	110	0.07555	10	0.007305	6	2053	10	1490
True	B	9	0	0	37	32	234	493	-1384	-1279	[187,440,280,563]	105.4	0.906	35	33	136	0.09962	11	0.009314	6	0	1	0.0002014	11	2756	1	400.3
True	B	9	0	0	37	33	532	502	-1294	-1280	[503,475,559,533]	81.59	0.8907	36	34	191	0.1589	16	0.01751	0	0	0	0	16	3583	0	NaN
True	B	9	0	0	37	34	581	498	-1279	-1280	[554,473,614,530]	54.9	0.9225	37	35	52	0.1598	4	0.006504	13	0.03976	1	0.0007424	4	2790	1	3489
True	B	9	0	0	37	35	348	504	-1349	-1283	[308,474,378,539]	89.45	0.9104	38	36	210	0.1783	18	0.01796	13	0.004467	1	0.0004579	18	4504	1	1103
True	B	9	0	0	37	36	426	518	-1326	-1288	[399,494,454,561]	128.5	0.9519	39	37	393	0.1532	35	0.02432	25	0.03232	2	0.001587	35	5594	2	1945
True	B	9	0	0	37	37	501	530	-1303	-1290	[470,503,542,568]	92.4	0.9278	40	38	128	0.1168	11	0.01063	36	0.01614	3	0.001938	11	2543	3	1188
True	B	9	0	0	37	38	625	525	-1265	-1287	[597,484,660,555]	106.2	0.9559	42	39	392	0.174	37	0.03109	51	0.05461	4	0.00218	37	5246	4	1759
True	B	9	0	0	37	39	462	543	-1314	-1292	[440,497,493,569]	71.6	0.7333	43	40	0	0	0	0	0	0	0	0	0	NaN	0	NaN
True	B	9	0	0	37	40	237	558	-1379	-1296	[198,518,301,592]	51.51	0.8189	44	41	26	0.03753	2	0.003466	12	0.0002652	1	0.0002886	2	1965	1	466.9
True	B	9	0	0	37	41	634	573	-1264	-1302	[609,550,660,602]	79.45	0.9712	45	42	222	0.1734	20	0.02247	26	0.0913	2	0.002225	20	4902	2	2790
True	B	9	0	0	37	42	323	597	-1356	-1306	[297,538,360,627]	86.68	0.8661	46	43	315	0.1496	30	0.0309	10	0.0002526	1	0.0004859	30	5320	1	340.3
True	B	9	0	0	37	43	276	583	-1369	-1305	[251,561,308,612]	60.44	0.8677	47	44	145	0.1169	13	0.0192	24	0.03088	2	0.001626	13	4513	2	2310
True	B	9	0	0	37	44	456	598	-1318	-1310	[409,564,494,637]	117.1	0.954	48	45	342	0.1605	31	0.02363	26	0.008708	2	0.0007479	31	6152	2	1327
True	B	9	0	0	37	45	653	615	-1260	-1314	[604,581,681,641]	108	0.9189	49	46	374	0.1448	37	0.03058	23	0.001993	2	0.001163	37	5353	2	520.2
True	B	9	0	0	37	46	540	626	-1291	-1319	[517,596,568,669]	95.61	0.9269	51	47	276	0.1602	26	0.02428	13	0.05612	1	0.0008217	26	4644	1	3820
True	B	9	0	0	37	47	502	643	-1299	-1326	[477,597,552,704]	141	0.9447	52	48	417	0.1415	40	0.02532	13	0.001164	1	0.0004234	40	5688	1	701.3
True	B	9	0	0	37	48	309	653	-1359	-1326	[284,613,350,694]	102.2	0.9347	53	49	189	0.1486	16	0.01397	0	0	0	0	16	3162	0	NaN
True	B	9	0	0	37	49	640	666	-1262	-1330	[608,636,670,706]	115.8	0.9477	54	50	344	0.1723	30	0.02313	26	0.006835	2	0.001002	30	5813	2	549.7
True	B	9	0	0	37	50	360	655	-1346	-1327	[334,625,386,685]	80.25	0.9434	55	51	263	0.1314	24	0.0267	12	0.004355	1	0.0009166	24	5910	1	699.8
True	B	9	0	0	37	51	577	670	-1281	-1333	[551,639,603,710]	89.36	0.9098	56	52	290	0.1321	29	0.02897	19	0.0003621	2	0.001278	29	5973	2	303.8
True	B	9	0	0	37	52	386	692	-1339	-1339	[343,661,415,729]	132.1	0.9419	57	53	196	0.1453	16	0.01081	0	0	0	0	16	4435	0	NaN
True	B	9	0	0	37	53	279	696	-1374	-1339	[213,655,312,752]	97.75	0.9588	58	54	230	0.142	19	0.01735	61	0.001483	6	0.001493	19	3388	6	577.5
True	B	9	0	0	37	54	329	710	-1356	-1344	[294,680,355,746]	99.09	0.9563	59	55	222	0.1498	19	0.01712	33	0.06365	3	0.002285	19	3567	3	2639
True	B	9	0	0	37	55	238	741	-1382	-1352	[209,705,265,797]	51.69	0.97	61	56	65	0.05766	8	0.01382	45	0.01383	4	0.001659	8	1024	4	848.7
True	B	9	0	0	37	56	667	748	-1254	-1354	[624,716,700,786]	101.2	0.9389	62	57	372	0.1427	34	0.02998	46	0.0654	4	0.002009	34	6457	4	2908
True	B	9	0	0	37	57	378	755	-1340	-1356	[336,722,411,790]	111.8	1.004	63	58	320	0.151	29	0.02316	23	0.001445	2	0.0008897	29	4481	2	445.8
True	B	9	0	0	37	58	435	766	-1323	-1359	[407,733,464,795]	106.5	0.9869	64	59	367	0.1804	34	0.0285	22	0.0008784	2	0.001667	34	5362	2	347.1
True	B	9	0	0	37	59	555	767	-1286	-1360	[528,734,584,803]	89.9	0.9428	65	60	275	0.1927	23	0.02284	13	0.03719	1	0.0006489	23	5000	1	3842
True	B	9	0	0	37	60	728	780	-1235	-1364	[692,747,757,826]	108.8	0.9229	66	61	305	0.1685	26	0.02133	26	0.05433	2	0.00114	26	4209	2	2248
True	B	9	0	0	37	61	634	792	-1265	-1369	[601,764,661,840]	84.72	0.9206	67	62	251	0.1737	22	0.02318	0	0	0	0	22	4709	0	NaN
True	B	9	0	0	37	62	527	813	-1293	-1375	[492,786,587,843]	126	0.9764	68	63	456	0.1596	43	0.03047	26	0.03258	2	0.001004	43	4755	2	2269
True	B	9	0	0	37	63	339	825	-1351	-1377	[315,794,364,862]	116.8	0.9433	69	64	381	0.1471	34	0.02599	26	0.06264	2	0.00211	34	5706	2	2379
True	B	9	0	0	37	64	700	835	-1244	-1380	[656,800,738,871]	148.6	0.926	70	65	456	0.1622	41	0.02462	38	0.02832	3	0.001295	41	4537	3	1418
True	B	9	0	0	37	65	405	823	-1332	-1376	[369,790,440,856]	120.6	0.9347	71	66	288	0.1838	25	0.0185	13	0.03524	1	0.0005698	25	4295	1	3960
True	B	9	0	0	37	66	289	840	-1368	-1386	[256,810,314,905]	117.7	0.8888	72	67	282	0.1729	25	0.01895	26	0.008637	2	0.0008532	25	4206	2	1115
True	B	9	0	0	37	67	230	885	-1382	-1390	[197,799,268,960]	54.9	0.9487	73	68	68	0.03856	7	0.01138	0	0	0	0	7	1241	0	NaN
True	B	9	0	0	37	68	639	853	-1263	-1385	[592,822,673,884]	156.4	0.9233	74	69	426	0.1611	38	0.02169	39	0.03906	3	0.001824	38	4431	3	1321
True	B	9	0	0	37	69	375	870	-1341	-1391	[339,829,412,908]	148	0.9713	75	70	490	0.1854	44	0.02654	24	0.01168	2	0.0008707	44	4191	2	921.2
True	B	9	0	0	37	70	462	863	-1315	-1389	[429,833,489,895]	83.83	0.925	76	71	230	0.1552	20	0.0213	20	0.0007337	2	0.001263	20	5040	2	336.7
True	B	9	0	0	37	71	535	874	-1293	-1392	[507,847,566,916]	116.1	0.9677	77	72	322	0.1679	28	0.02152	0	0	0	0	28	4193	0	NaN
True	B	9	0	0	37	72	588	899	-1277	-1399	[540,861,624,931]	140.9	0.9604	78	73	533	0.1604	48	0.03042	42	0.03395	4	0.00212	48	4766	4	1309
True	B	9	0	0	37	73	428	911	-1325	-1402	[399,884,452,935]	79.9	0.8516	79	74	195	0.1985	15	0.01676	13	0.01376	1	0.001028	15	4666	1	1299
True	B	9	0	0	37	74	262	942	-1373	-1411	[224,898,322,980]	65.53	0.9104	80	75	39	0.03308	3	0.004087	13	0.00524	1	0.000238	3	1381	1	1723
True	B	9	0	0	37	75	392	929	-1335	-1409	[360,904,422,958]	116.8	0.9258	81	76	304	0.1692	27	0.02064	13	0.002716	1	0.00123	27	4976	1	328
True	B	9	0	0	37	76	488	951	-1307	-1412	[463,907,512,975]	131.1	0.9717	82	77	401	0.1657	36	0.02452	26	0.04739	2	0.001736	36	4053	2	1693
True	B	9	0	0	37	77	351	950	-1348	-1415	[312,918,387,991]	117.7	0.9479	83	78	263	0.1427	22	0.01668	13	0.02682	1	0.0006309	22	3855	1	2819
True	B	9	0	0	37	78	534	959	-1293	-1419	[510,935,560,998]	94.72	0.9615	84	79	297	0.1648	27	0.02545	26	0.05226	2	0.001637	27	4962	2	2684
True	B	9	0	0	37	79	648	961	-1259	-1418	[618,931,679,998]	134.4	0.9595	85	80	404	0.1421	36	0.02392	13	0.04644	1	0.0008157	36	4678	1	3539
True	B	9	0	0	37	80	307	979	-1361	-1423	[274,941,336,1016]	77.84	0.9375	86	81	139	0.1418	13	0.01491	24	0.0187	2	0.0009723	13	4298	2	1203
True	B	9	0	0	37	81	663	1004	-1256	-1431	[630,973,685,1034]	95.52	0.9076	87	82	311	0.1721	28	0.02617	18	0.01066	2	0.002497	28	4730	2	1498
True	B	9	0	0	37	82	346	1052	-1350	-1442	[307,1006,376,1078]	153.2	0.9579	89	83	294	0.158	25	0.01457	64	0.03031	6	0.003889	25	3691	6	780.3
True	B	9	0	0	37	83	677	1047	-1250	-1443	[653,1015,705,1077]	81.33	0.8606	90	84	200	0.1729	17	0.01866	83	0.04839	8	0.005638	17	3780	8	1460
True	B	9	0	0	37	84	854	1037	-1198	-1441	[820,1005,881,1078]	109.8	0.9552	91	85	266	0.132	24	0.01951	13	0.001697	1	0.0005453	24	4360	1	548.5
True	B	9	0	0	37	85	591	65	-1276	-1152	[550,37,630,110]	161	0.9316	97	88	477	0.1767	43	0.02384	39	0.05311	3	0.001854	43	4326	3	2069
True	B	9	0	0	37	86	476	167	-1309	-1179	[440,119,521,203]	171.4	0.9218	98	89	507	0.1802	46	0.02396	79	0.06934	7	0.002972	46	3865	7	1485
True	B	9	0	0	37	87	584	565	-1278	-1299	[546,525,614,610]	143.7	0.9469	99	90	351	0.1562	31	0.01925	44	0.01314	4	0.00273	31	4733	4	920.1
True	B	9	0	0	37	88	380	577	-1339	-1302	[333,523,427,618]	154.3	0.9697	100	91	432	0.1598	38	0.02199	26	0.02028	2	0.0005995	38	4883	2	2101
True	B	9	0	0	37	89	527	729	-1295	-1347	[484,698,572,763]	150.7	0.9568	101	92	438	0.1401	42	0.02488	0	0	0	0	42	4519	0	NaN
True	B	9	0	0	37	90	491	757	-1307	-1356	[456,702,523,798]	155.6	0.9665	102	93	500	0.1674	44	0.02524	0	0	0	0	44	5089	0	NaN
True	B	9	0	0	37	91	591	961	-1276	-1418	[560,927,630,1003]	150.2	0.988	103	94	461	0.17	40	0.02377	0	0	0	0	40	4910	0	NaN
True	B	9	0	0	37	92	433	969	-1324	-1419	[375,922,472,1007]	224.9	0.8183	104	95	585	0.1671	50	0.01985	0	0	0	0	50	4427	0	NaN
True	B	9	0	0	37	93	498	1011	-1304	-1433	[456,979,536,1053]	171.8	0.99	105	96	565	0.1727	49	0.02547	0	0	0	0	49	4839	0	NaN
True	B	9	0	0	37	94	720	1019	-1237	-1437	[682,989,753,1063]	141.4	0.9709	106	97	355	0.1668	31	0.01957	23	0.03049	2	0.001055	31	4204	2	1816
True	B	9	0	0	38	1	787	67	-573	-1150	[751,39,818,98]	89.81	0.9321	1	1	280	0.1483	25	0.02485	30	0.004656	3	0.001865	25	4043	3	629.5
True	B	9	0	0	38	2	901	237	-538	-1201	[878,216,925,262]	97.13	0.9861	2	2	209	0.1714	18	0.01654	31	0.04795	3	0.004525	18	2989	3	2969
True	B	9	0	0	38	3	896	317	-538	-1224	[859,281,948,344]	130.7	0.9443	3	3	374	0.1419	35	0.02391	26	0.05111	2	0.0009709	35	4295	2	3054
True	B	11	0	0	1	1	74	591	-139	-16	[46,565,109,621]	98.64	0.9155	1	1	307	0.1743	27	0.02443	13	0.007535	1	0.0007536	27	3567	1	916.1
True	B	11	0	0	1	2	361	190	-54	103	[331,152,390,234]	164.4	0.9894	2	2	506	0.1423	47	0.02552	39	0.03148	3	0.001734	47	3756	3	1415
True	B	11	0	0	2	1	939	56	-1174	1434	[908,31,964,93]	142.4	0.9418	4	3	349	0.1397	30	0.01881	18	0.006231	2	0.0022	30	2818	2	1273
True	B	11	0	0	2	2	1023	78	-1148	1431	[993,46,1046,105]	136	0.9576	5	4	388	0.1299	35	0.02298	39	0.09597	3	0.00468	35	2587	3	2095
True	B	11	0	0	2	3	976	82	-1161	1430	[952,43,1000,109]	88.65	0.9883	6	5	247	0.1213	24	0.02417	68	0.04124	6	0.005391	24	3379	6	1048
True	B	11	0	0	2	4	943	112	-1171	1420	[918,85,968,139]	43.39	0.887	8	7	92	0.1334	8	0.01646	0	0	0	0	8	1823	0	NaN
True	B	11	0	0	2	5	785	106	-1217	1421	[750,72,829,139]	100.5	0.9544	9	8	271	0.1273	25	0.0222	12	0.000297	1	0.0004034	25	3506	1	351.5
True	B	11	0	0	2	6	711	103	-1240	1414	[670,63,764,207]	77.04	0.9653	10	9	183	0.09402	16	0.01854	62	0.0006186	6	0.0009043	16	1873	6	398
True	B	11	0	0	2	7	811	158	-1209	1405	[786,130,853,200]	120.8	0.9711	11	10	334	0.1579	30	0.02217	26	0.05496	2	0.001421	30	4185	2	2450
True	B	11	0	0	2	8	661	150	-1256	1408	[632,129,681,169]	43.56	0.8501	12	11	26	0.07779	2	0.004098	76	0.1187	6	0.008772	2	1957	6	2207
True	B	11	0	0	2	9	765	167	-1225	1404	[735,129,794,195]	120.8	0.9021	13	12	388	0.1694	34	0.02513	41	0.04008	4	0.00304	34	3507	4	1768
True	B	11	0	0	2	10	904	183	-1183	1397	[880,155,929,218]	101.1	0.9578	14	13	356	0.1445	34	0.03001	26	0.05729	2	0.001695	34	3764	2	2178
True	B	11	0	0	2	11	851	192	-1198	1396	[810,153,887,226]	131.5	0.9825	15	14	345	0.1562	30	0.02037	10	0.0002666	1	0.0004951	30	4261	1	887
True	B	11	0	0	2	12	1044	187	-1141	1397	[1012,157,1078,218]	91.32	0.9619	16	15	317	0.1459	28	0.02737	0	0	0	0	28	3093	0	NaN
True	B	11	0	0	2	13	995	213	-1156	1390	[962,171,1029,246]	111.2	0.953	17	16	231	0.1024	22	0.01766	26	0.002779	2	0.001032	22	3677	2	568.1
True	B	11	0	0	2	14	637	240	-1264	1384	[557,175,709,291]	105.5	0.9522	18	17	280	0.1529	24	0.0203	48	0.000449	5	0.0005718	24	4495	5	392
True	B	11	0	0	2	15	700	269	-1242	1372	[663,223,746,305]	117.3	0.9458	19	18	268	0.1335	23	0.0175	11	0.0002148	1	0.0003723	23	3896	1	519.4
True	B	11	0	0	2	16	1057	278	-1136	1370	[1034,247,1078,306]	87.31	0.9686	20	19	300	0.1662	27	0.02761	0	0	0	0	27	3607	0	NaN
True	B	11	0	0	2	17	779	292	-1220	1366	[740,257,816,333]	94.54	0.9305	21	20	239	0.1409	22	0.02077	57	0.03226	5	0.001922	22	3757	5	1291
True	B	11	0	0	2	18	597	293	-1280	1359	[534,260,634,392]	118.6	0.9008	22	21	198	0.1456	16	0.01204	96	0.002247	9	0.002314	16	4046	9	456.1
True	B	11	0	0	2	19	854	321	-1198	1357	[829,290,880,354]	126.5	0.9787	23	22	452	0.1226	44	0.03105	38	0.09221	3	0.003128	44	3967	3	2016
True	B	11	0	0	2	20	927	316	-1178	1358	[883,293,959,342]	96.06	0.9295	24	23	303	0.129	28	0.02602	38	0.05907	3	0.001956	28	4630	3	2194
True	B	11	0	0	2	21	1000	319	-1154	1358	[971,279,1041,356]	88.65	0.9883	25	24	306	0.1699	27	0.02719	13	0.01306	1	0.0005181	27	4785	1	1777
True	B	11	0	0	2	22	650	318	-1258	1357	[619,289,680,348]	66.69	1.007	26	25	180	0.1527	16	0.02142	28	0.001058	3	0.001542	16	3855	3	422.4
True	B	11	0	0	2	23	557	269	-1291	1367	[489,224,589,345]	41.42	0.8625	28	27	46	0.06016	4	0.008621	25	0.000512	2	0.0004458	4	1337	2	465
True	B	11	0	0	2	24	800	350	-1214	1348	[773,327,825,374]	83.74	0.9897	30	28	300	0.194	28	0.02985	13	0.04811	1	0.001063	28	4120	1	3086
True	B	11	0	0	2	25	604	355	-1272	1344	[569,321,639,424]	146.6	0.9496	31	29	340	0.1443	29	0.01766	34	0.001628	3	0.001347	29	3698	3	439.8
True	B	11	0	0	2	26	707	359	-1240	1342	[675,330,751,422]	141	1.004	32	30	402	0.148	36	0.02278	98	0.01516	9	0.003309	36	4070	9	605.4
True	B	11	0	0	2	27	654	378	-1258	1339	[613,345,689,422]	130.9	0.8968	33	31	408	0.1631	36	0.02456	39	0.02251	3	0.001467	36	4008	3	1848
True	B	11	0	0	2	28	758	377	-1226	1340	[735,355,780,413]	71.6	0.996	35	32	145	0.2188	12	0.01496	13	0.03642	1	0.00146	12	3728	1	1602
True	B	11	0	0	2	29	564	377	-1284	1339	[544,358,592,402]	66.15	0.9271	36	33	144	0.1766	12	0.01619	34	0.004144	3	0.004196	12	4301	3	390.9
True	B	11	0	0	2	30	792	404	-1217	1331	[751,377,823,442]	94.09	0.9787	38	35	312	0.1673	29	0.02751	34	0.02936	3	0.001791	29	4270	3	1421
True	B	11	0	0	2	31	564	420	-1284	1327	[533,394,601,446]	73.74	1	39	36	289	0.1569	27	0.03269	28	0.001523	3	0.001641	27	4884	3	494.3
True	B	11	0	0	2	32	652	440	-1260	1322	[624,415,672,463]	107	0.9053	40	37	353	0.1487	33	0.02752	0	0	0	0	33	4244	0	NaN
True	B	11	0	0	2	33	470	435	-1312	1323	[424,384,529,483]	55.97	0.8959	41	38	70	0.07145	6	0.009569	13	0.0003806	1	0.0001981	6	1546	1	536.2
True	B	11	0	0	2	34	694	454	-1245	1316	[667,425,719,490]	78.47	0.8998	42	39	143	0.109	13	0.01479	36	0.0113	3	0.001983	13	2957	3	1060
True	B	11	0	0	2	35	530	468	-1295	1312	[485,448,576,489]	97.93	0.8848	43	40	220	0.184	18	0.01641	57	0.05235	5	0.003509	18	3900	5	1276
True	B	11	0	0	2	36	658	488	-1257	1307	[633,460,684,522]	70.88	0.9419	44	41	153	0.1874	12	0.01511	42	0.03463	4	0.003208	12	5132	4	2237
True	B	11	0	0	2	37	519	513	-1297	1300	[491,485,553,542]	63.2	0.8693	45	42	78	0.1074	6	0.008475	13	0.003362	1	0.0005214	6	2796	1	557.6
True	B	11	0	0	2	38	430	512	-1328	1294	[346,447,493,610]	101.8	0.9139	46	43	250	0.1699	20	0.01754	0	0	0	0	20	3553	0	NaN
True	B	11	0	0	2	39	494	545	-1307	1287	[453,520,523,580]	109.8	0.9016	47	44	306	0.1505	27	0.02195	20	0.0008116	2	0.001318	27	5092	2	404.4
True	B	11	0	0	2	40	592	568	-1276	1283	[564,541,619,595]	56.78	0.9411	48	45	112	0.1201	10	0.01572	40	0.04108	4	0.002478	10	2827	4	1315
True	B	11	0	0	2	41	800	564	-1214	1284	[768,532,829,615]	67.67	0.7877	49	46	0	0	0	0	0	0	0	0	0	NaN	0	NaN
True	B	11	0	0	2	42	637	575	-1261	1281	[615,554,662,597]	67.58	0.9272	50	47	216	0.141	20	0.02642	13	0.06105	1	0.001159	20	4507	1	3548
True	B	11	0	0	2	43	759	589	-1226	1277	[727,549,792,618]	107.2	0.9806	51	48	405	0.1392	40	0.03331	13	0.0005974	1	0.0005675	40	5525	1	364.5
True	B	11	0	0	2	44	498	600	-1304	1273	[471,572,528,637]	65.08	0.843	52	49	52	0.0328	5	0.006859	24	0.001212	2	0.001076	5	1788	2	584.6
True	B	11	0	0	2	45	551	597	-1288	1271	[523,568,584,651]	123.1	0.9287	53	50	391	0.1528	36	0.02611	36	0.002465	3	0.001707	36	3988	3	443.6
True	B	11	0	0	2	46	835	594	-1204	1275	[799,560,864,627]	50.8	0.9058	54	51	55	0.06237	6	0.01054	0	0	0	0	6	1731	0	NaN
True	B	11	0	0	2	47	598	615	-1274	1268	[572,590,622,643]	94.18	0.9188	55	52	304	0.1791	27	0.02559	13	0.06236	1	0.001017	27	3637	1	3865
True	B	11	0	0	2	48	353	613	-1349	1268	[302,572,385,659]	60.35	0.9368	56	53	143	0.1186	14	0.02071	35	0.0007556	3	0.0008564	14	3363	3	398.4
True	B	11	0	0	2	49	930	632	-1174	1263	[906,608,961,662]	119.6	0.9302	57	54	414	0.1323	39	0.0291	39	0.05675	3	0.003432	39	5163	3	1589
True	B	11	0	0	2	50	399	643	-1334	1260	[369,604,432,690]	96.06	0.9199	58	55	225	0.1151	20	0.01859	13	0.0006777	1	0.0003998	20	2982	1	411.2
True	B	11	0	0	2	51	519	648	-1298	1258	[486,616,550,685]	117.2	0.9544	59	56	317	0.1415	30	0.02285	70	0.0038	6	0.003974	30	4381	6	361.2
True	B	11	0	0	2	52	463	640	-1316	1265	[426,572,494,684]	98.91	0.9358	60	57	297	0.1709	25	0.02256	99	0.00803	9	0.00256	25	3949	9	612.5
True	B	11	0	0	2	53	717	659	-1238	1256	[690,632,745,687]	90.97	0.9292	61	58	336	0.149	31	0.03042	24	0.01949	2	0.001625	31	4123	2	916.1
True	B	11	0	0	2	54	876	658	-1191	1256	[847,633,903,692]	111.3	0.9724	62	59	393	0.1525	36	0.02887	39	0.0344	3	0.002667	36	4181	3	1131
True	B	11	0	0	2	55	319	702	-1357	1241	[273,646,371,776]	128.8	0.9282	63	60	351	0.1355	31	0.02148	85	0.005516	7	0.0009502	31	2658	7	715.7
True	B	11	0	0	2	56	422	694	-1326	1245	[389,666,469,728]	97.66	0.9582	64	61	248	0.1254	23	0.02102	113	0.02704	10	0.004751	23	3988	10	757.7
True	B	11	0	0	2	57	719	713	-1238	1238	[692,686,746,753]	121.5	0.9217	65	62	293	0.1466	26	0.0191	39	0.08179	3	0.002597	26	4596	3	2264
True	B	11	0	0	2	58	670	741	-1252	1231	[638,715,705,770]	91.41	0.9418	66	63	277	0.1357	26	0.02539	0	0	0	0	26	4294	0	NaN
True	B	11	0	0	2	59	372	762	-1341	1225	[348,738,398,789]	71.42	0.9578	67	64	138	0.1114	11	0.01375	13	0.006028	1	0.001155	11	2888	1	1164
True	B	11	0	0	2	60	663	785	-1253	1217	[641,763,697,814]	86.5	0.9744	68	65	354	0.1701	33	0.03406	44	0.04515	4	0.003276	33	4476	4	1899
True	B	11	0	0	2	61	728	792	-1234	1216	[695,757,770,833]	112.1	0.9669	69	66	407	0.1553	37	0.02946	13	0.01806	1	0.0004517	37	4808	1	1623
True	B	11	0	0	2	62	266	788	-1371	1217	[221,710,330,835]	74.45	0.8625	70	67	215	0.1465	19	0.02278	77	0.002364	8	0.001287	19	3312	8	749.1
True	B	11	0	0	2	63	361	804	-1346	1215	[320,744,395,835]	117.5	0.9648	71	68	340	0.1434	31	0.02356	48	0.001817	5	0.002367	31	4320	5	456.4
True	B	11	0	0	2	64	464	823	-1314	1208	[426,781,509,855]	116.9	0.9353	72	69	332	0.1551	28	0.02137	42	0.00366	4	0.001915	28	4313	4	482.2
True	B	11	0	0	2	65	412	849	-1330	1200	[368,813,443,880]	94.81	0.9036	73	70	256	0.1457	22	0.02072	26	0.002729	2	0.001009	22	3172	2	400.3
True	B	11	0	0	2	66	277	848	-1370	1198	[249,821,305,891]	94.9	0.9424	74	71	263	0.1662	23	0.02164	13	0.005189	1	0.0006301	23	3655	1	654.2
True	B	11	0	0	2	67	225	864	-1386	1191	[186,817,261,931]	82.93	0.9092	75	72	177	0.1251	15	0.01615	36	0.0005344	4	0.0009372	15	2399	4	623.2
True	B	11	0	0	2	68	357	879	-1346	1190	[331,849,382,911]	80.08	0.9531	77	73	225	0.1362	21	0.02341	26	0.06545	2	0.001536	21	3936	2	2894
True	B	11	0	0	2	69	527	884	-1294	1189	[492,853,564,917]	121.7	0.9752	78	74	395	0.1904	34	0.02495	0	0	0	0	34	4459	0	NaN
True	B	11	0	0	2	70	581	884	-1278	1189	[555,862,611,904]	40.53	0.7564	79	75	52	0.1166	4	0.008811	0	0	0	0	4	2545	0	NaN
True	B	11	0	0	2	71	303	900	-1362	1183	[268,864,333,943]	81.06	0.907	80	76	265	0.147	24	0.02643	11	0.0001474	1	0.0004423	24	4515	1	474.6
True	B	11	0	0	2	72	691	901	-1246	1184	[661,867,721,929]	89.9	0.9964	81	77	327	0.1861	29	0.0288	13	0.004195	1	0.0008217	29	3703	1	438.7
True	B	11	0	0	2	73	478	907	-1310	1182	[443,878,506,935]	80.79	0.958	82	78	298	0.1814	27	0.02983	23	0.004204	2	0.001316	27	4217	2	590.9
True	B	11	0	0	2	74	648	928	-1259	1175	[616,898,681,964]	91.06	0.8393	83	79	198	0.1431	17	0.01667	18	0.009254	2	0.001045	17	3561	2	2711
True	B	11	0	0	2	75	596	925	-1274	1176	[567,899,620,953]	70.26	0.9256	84	80	142	0.1626	12	0.01525	13	0.04099	1	0.0007968	12	3620	1	3241
True	B	11	0	0	2	76	255	938	-1377	1172	[218,891,286,981]	93.29	0.933	85	81	276	0.1337	26	0.02488	79	0.002002	7	0.002461	26	4152	7	359.8
True	B	11	0	0	2	77	189	972	-1396	1165	[160,911,226,1008]	59.99	0.9212	86	82	106	0.07803	9	0.01339	65	0.006744	6	0.001659	9	1838	6	591.6
True	B	11	0	0	2	78	373	982	-1341	1161	[344,933,399,1016]	115.8	0.9387	87	83	520	0.1853	47	0.03624	0	0	0	0	47	3824	0	NaN
True	B	11	0	0	2	79	499	986	-1303	1158	[464,956,545,1020]	107	0.8967	88	84	295	0.1436	28	0.02335	47	0.02992	4	0.001952	28	4130	4	1062
True	B	11	0	0	2	80	638	988	-1262	1157	[605,962,666,1020]	90.25	0.9658	89	85	342	0.1499	32	0.03165	23	0.003106	2	0.001368	32	4257	2	825.8
True	B	11	0	0	2	81	695	999	-1244	1155	[663,969,738,1031]	136	0.9747	90	86	539	0.1596	52	0.03414	0	0	0	0	52	4458	0	NaN
True	B	11	0	0	2	82	303	1013	-1362	1150	[274,970,336,1050]	81.68	0.9423	91	87	238	0.139	24	0.02623	26	0.02711	2	0.001004	24	3876	2	1609
True	B	11	0	0	2	83	238	1010	-1380	1150	[206,968,280,1055]	76.33	0.9601	92	88	242	0.1343	23	0.0269	8	4.579e-05	1	0.000317	23	4277	1	378.1
True	B	11	0	0	2	84	520	1035	-1297	1144	[496,1000,550,1063]	109.9	0.9372	93	89	354	0.1408	34	0.02762	44	0.03511	4	0.003284	34	4089	4	1011
True	B	11	0	0	2	85	365	1032	-1342	1143	[350,1021,391,1058]	51.24	0.8731	94	90	13	0.04118	1	0.001742	10	0.004455	1	0.004425	1	1886	1	471.5
True	B	11	0	0	2	86	187	1039	-1397	1141	[149,995,231,1078]	64.1	0.866	95	91	108	0.07901	10	0.01393	41	0.01014	4	0.0009363	10	1957	4	1213
True	B	11	0	0	2	87	737	1037	-1232	1142	[701,1001,772,1073]	88.82	0.9895	96	92	220	0.1242	19	0.0191	0	0	0	0	19	3008	0	NaN
True	B	11	0	0	2	88	672	1041	-1252	1141	[644,1009,697,1077]	92.93	0.9023	97	93	336	0.1377	33	0.0317	9	0.0001783	1	0.0007123	33	3886	1	286.6
True	B	11	0	0	2	89	565	1054	-1281	1137	[537,1028,614,1078]	129.2	0.9135	98	94	417	0.1465	39	0.02695	13	0.01158	1	0.0006964	39	3479	1	950.1
True	B	11	0	0	2	90	880	67	-1190	1433	[842,29,911,104]	135.7	0.9399	102	97	417	0.1437	37	0.02434	83	0.02812	7	0.003844	37	3469	7	784
True	B	11	0	0	2	91	924	368	-1177	1343	[892,334,962,418]	127.7	0.9663	103	98	422	0.1351	39	0.02725	36	0.05799	3	0.001624	39	4575	3	2414
True	B	11	0	0	2	92	871	388	-1193	1336	[839,354,907,424]	126.7	0.9795	104	99	415	0.1326	38	0.02678	0	0	0	0	38	4606	0	NaN
True	B	11	0	0	2	93	545	704	-1291	1242	[489,671,586,739]	158.9	0.9782	105	100	593	0.151	55	0.0309	13	0.0004635	1	0.0003797	55	4537	1	319.6
True	B	11	0	0	2	94	470	754	-1315	1226	[404,718,513,793]	126.7	0.9795	106	101	415	0.1877	37	0.02607	13	0.002274	1	0.0002581	37	4027	1	558.8
True	B	11	0	0	2	95	596	790	-1275	1216	[545,754,644,831]	167.5	0.9758	107	102	551	0.177	49	0.02612	39	0.0299	3	0.0008905	49	4236	3	1572
True	B	11	0	0	2	96	617	853	-1269	1198	[562,818,665,888]	198.5	0.9661	108	103	617	0.1464	58	0.02609	44	0.03039	4	0.001582	58	4636	4	1420
True	B	11	0	0	2	97	424	946	-1325	1168	[381,889,470,1001]	209.6	0.9482	109	104	679	0.1712	60	0.02555	38	0.0188	3	0.0008579	60	4135	3	1400
True	B	11	0	0	2	98	584	1008	-1278	1152	[551,974,615,1041]	150.2	0.9962	110	105	557	0.1529	50	0.02973	39	0.0486	3	0.002433	50	4136	3	1470
True	B	11	0	0	3	1	722	52	-911	1437	[681,1,806,124]	67.04	0.8481	8	5	111	0.09161	10	0.01332	84	0.003902	8	0.001035	10	4552	8	915.2
True	B	11	0	0	3	2	112	45	-1097	1438	[81,17,137,73]	69.9	0.9576	9	6	200	0.1241	18	0.02299	13	0.02105	1	0.0007686	18	2763	1	1620
True	B	11	0	0	3	3	499	51	-981	1438	[474,30,524,76]	106.3	0.9194	10	7	390	0.1495	37	0.03107	26	0.1321	2	0.005063	37	3357	2	2444
True	B	11	0	0	3	4	616	57	-946	1436	[586,32,654,85]	82.22	0.9248	12	9	275	0.1024	27	0.02932	26	0.05481	2	0.001558	27	4026	2	2823
True	B	11	0	0	3	5	975	61	-838	1434	[943,33,1007,91]	118.4	0.9784	13	10	240	0.1163	21	0.01584	26	0.04556	2	0.001626	21	2847	2	1904
True	B	11	0	0	3	6	278	61	-1047	1435	[247,30,306,90]	67.13	0.9352	15	12	155	0.1099	13	0.01729	13	0.01744	1	0.0005556	13	3110	1	2330
True	B	11	0	0	3	7	467	85	-990	1427	[440,58,497,115]	102.2	0.9737	16	13	249	0.1145	22	0.01921	13	0.04267	1	0.001003	22	3198	1	2315
True	B	11	0	0	3	8	654	90	-934	1427	[615,38,689,128]	117	0.9815	17	14	335	0.1393	30	0.02288	59	0.01109	6	0.001993	30	3438	6	715.9
True	B	11	0	0	3	9	1034	87	-821	1427	[1006,33,1067,128]	121.2	0.964	18	15	355	0.1166	33	0.0243	0	0	0	0	33	2949	0	NaN
True	B	11	0	0	3	10	933	85	-851	1428	[905,58,963,112]	71.95	0.9863	19	16	189	0.1285	17	0.02109	23	0.002959	2	0.001386	17	3204	2	611.3
True	B	11	0	0	3	11	130	98	-1092	1424	[90,71,161,124]	84.63	0.91	20	17	262	0.1376	23	0.02426	42	0.01535	4	0.002695	23	2701	4	1231
True	B	11	0	0	3	12	409	100	-1008	1422	[387,73,433,129]	70.17	0.9249	21	18	234	0.135	22	0.02799	62	0.04282	5	0.005834	22	3552	5	706.9
True	B	11	0	0	3	13	980	116	-837	1418	[951,87,1008,146]	92.31	0.9679	23	19	321	0.1183	30	0.02901	26	0.01243	2	0.00144	30	3726	2	1008
True	B	11	0	0	3	14	313	124	-1036	1416	[277,92,357,163]	131.7	0.94	24	20	382	0.1249	35	0.02373	36	0.03001	3	0.001717	35	4026	3	1206
True	B	11	0	0	3	15	193	114	-1074	1418	[150,89,220,140]	70.17	0.9479	25	21	140	0.1061	11	0.01399	23	0.003756	2	0.001251	11	2041	2	513.6
True	B	11	0	0	3	16	112	138	-1095	1411	[83,111,147,171]	103.6	0.9142	26	22	341	0.1308	31	0.02672	13	0.008039	1	0.0007294	31	3527	1	1025
True	B	11	0	0	3	17	361	142	-1023	1409	[332,119,386,172]	95.7	0.9673	27	23	323	0.107	32	0.02985	13	0.04926	1	0.00114	32	4378	1	3150
True	B	11	0	0	3	18	406	148	-1009	1409	[377,122,438,177]	105.7	0.9436	28	24	452	0.1399	43	0.03632	0	0	0	0	43	4533	0	NaN
True	B	11	0	0	3	19	169	159	-1080	1406	[141,119,198,191]	89.63	0.9211	29	25	288	0.1291	27	0.02689	13	0.005209	1	0.0005379	27	3709	1	1039
True	B	11	0	0	3	20	46	161	-1117	1404	[3,137,78,188]	119.2	0.9636	30	26	266	0.1359	22	0.01648	38	0.03761	3	0.00265	22	3062	3	1105
True	B	11	0	0	3	21	89	171	-1102	1402	[66,127,133,200]	99.18	0.9278	31	27	232	0.1492	19	0.0171	0	0	0	0	19	3186	0	NaN
True	B	11	0	0	3	22	227	189	-1061	1397	[188,148,288,228]	138.7	0.9357	32	28	554	0.1483	50	0.03218	10	0.0001687	1	0.000501	50	3860	1	331.5
True	B	11	0	0	3	23	73	207	-1109	1391	[48,178,101,232]	96.86	0.9741	33	29	309	0.1515	27	0.02488	0	0	0	0	27	3263	0	NaN
True	B	11	0	0	3	24	27	220	-1122	1387	[1,182,60,255]	75.97	0.9135	34	30	186	0.1318	16	0.0188	64	0.01778	8	0.003291	16	3811	8	1118
True	B	11	0	0	3	25	182	228	-1075	1383	[150,190,221,267]	115.3	0.9732	35	31	366	0.103	35	0.02709	33	0.004434	3	0.001253	35	5372	3	420.3
True	B	11	0	0	3	26	254	225	-1053	1385	[219,197,296,255]	99.98	0.9514	36	32	306	0.1443	28	0.025	35	0.02865	3	0.001659	28	3642	3	1453
True	B	11	0	0	3	27	73	262	-1107	1374	[25,230,121,298]	90.34	0.9455	37	33	240	0.1309	22	0.02174	0	0	0	0	22	3380	0	NaN
True	B	11	0	0	3	28	316	257	-1036	1374	[292,223,343,296]	75.52	0.9896	38	34	263	0.1689	23	0.02719	13	0.001567	1	0.000757	23	3708	1	363.2
True	B	11	0	0	3	29	266	272	-1050	1371	[240,246,295,306]	126.1	0.9592	39	35	379	0.132	35	0.02477	26	0.06759	2	0.002035	35	3203	2	2824
True	B	11	0	0	3	30	40	304	-1119	1360	[1,254,76,361]	109.9	0.9652	40	36	325	0.1201	29	0.02356	62	0.01527	5	0.001368	29	3811	5	1053
True	B	11	0	0	3	31	53	387	-1114	1338	[22,353,91,423]	126.1	0.9331	42	38	439	0.1161	42	0.02975	39	0.02131	3	0.001592	42	5059	3	1200
True	B	11	0	0	3	32	566	25	-958	1446	[538,1,622,51]	126.3	0.9965	44	39	389	0.1533	35	0.02474	133	0.07124	11	0.006858	35	3395	11	1303
True	B	11	0	0	3	33	401	47	-1011	1441	[363,1,439,86]	120.3	0.9783	45	40	335	0.1383	29	0.02151	39	0.02496	3	0.0009743	29	4031	3	1582
True	B	11	0	0	3	34	335	63	-1030	1435	[288,14,378,98]	160.6	0.9842	46	41	536	0.1366	48	0.02668	26	0.02016	2	0.0007822	48	4050	2	1867
True	B	11	0	0	4	1	1023	33	-501	1444	[978,1,1077,76]	83.2	0.828	3	3	8	0.0003937	1	0.001073	0	0	0	0	1	353.5	0	NaN
True	B	11	0	0	4	2	770	32	-580	1445	[713,1,796,59]	97.22	0.881	4	4	343	0.1482	31	0.02847	0	0	0	0	31	3483	0	NaN
True	B	11	0	0	4	3	925	47	-530	1437	[880,9,970,112]	57.31	0.8848	5	5	109	0.07505	10	0.01558	19	0.005227	2	0.000473	10	1314	2	1261
True	B	11	0	0	4	4	198	50	-749	1438	[160,22,226,82]	112.3	0.905	6	6	238	0.1119	20	0.0159	26	0.0259	2	0.001629	20	3456	2	1479
True	B	11	0	0	4	5	818	49	-563	1440	[782,1,849,87]	98.02	0.9214	7	7	196	0.09622	16	0.01457	68	0.004411	7	0.002271	16	2360	7	552.4
True	B	11	0	0	4	6	736	58	-588	1436	[707,26,762,86]	106.2	0.9854	8	8	329	0.1654	27	0.02269	13	0.05549	1	0.001211	27	3002	1	2566
True	B	11	0	0	4	7	980	58	-515	1434	[951,22,1008,105]	69.01	0.9271	9	9	108	0.08859	10	0.01294	0	0	0	0	10	2134	0	NaN
True	B	11	0	0	4	8	690	75	-596	1427	[662,43,768,128]	69.36	0.9903	10	10	177	0.116	17	0.02188	10	7.694e-05	1	0.0002591	17	3536	1	294.3
True	B	11	0	0	4	9	249	77	-733	1429	[221,51,275,105]	71.06	0.8781	11	11	172	0.1122	14	0.01759	26	0.01239	2	0.001524	14	2614	2	1090
True	B	11	0	0	4	10	872	88	-545	1425	[839,39,917,143]	89	0.9174	12	12	276	0.1595	26	0.02608	0	0	0	0	26	3344	0	NaN
True	B	11	0	0	4	11	163	84	-759	1427	[137,57,190,112]	71.42	0.9461	13	13	155	0.1104	13	0.01625	0	0	0	0	13	2923	0	NaN
True	B	11	0	0	4	12	209	95	-745	1424	[177,70,237,123]	57.4	0.8857	14	14	65	0.08364	5	0.007776	12	0.001593	1	0.0007189	5	2279	1	411.9
True	B	11	0	0	4	13	814	108	-565	1422	[767,72,851,144]	73.11	0.9362	15	15	73	0.04729	6	0.007326	0	0	0	0	6	1726	0	NaN
True	B	11	0	0	4	14	40	94	-799	1427	[1,39,67,121]	71.86	0.9495	16	16	167	0.09347	16	0.01988	83	0.05094	7	0.003025	16	3989	7	1887
True	B	11	0	0	4	15	766	124	-578	1415	[727,91,804,155]	93.65	0.9867	17	17	177	0.1185	15	0.0143	0	0	0	0	15	2982	0	NaN
True	B	11	0	0	4	16	569	1025	-637	1146	[530,988,602,1065]	106.9	0.7379	18	18	279	0.1349	27	0.02254	33	0.03927	3	0.002141	27	2674	3	1658
True	B	11	0	0	4	17	126	44	-770	1440	[90,1,160,80]	140.2	0.9919	19	19	447	0.1422	40	0.02548	0	0	0	0	40	3427	0	NaN
True	B	11	0	0	4	18	96	101	-779	1422	[59,64,137,139]	139.9	0.9565	20	20	536	0.1352	51	0.03255	0	0	0	0	51	3248	0	NaN
True	B	11	0	0	5	1	1031	28	-176	1445	[989,1,1073,67]	92.48	0.8388	5	3	274	0.1186	26	0.0251	85	0.03246	7	0.003159	26	2029	7	877
True	B	11	0	0	5	2	565	31	-316	1437	[525,1,602,106]	59.28	0.9522	6	4	107	0.1278	9	0.01355	26	0.01535	2	0.0003712	9	2976	2	2733
True	B	11	0	0	5	3	501	49	-335	1439	[456,1,543,100]	53.92	0.831	7	5	13	0.00891	1	0.001656	13	0.002772	1	0.0001669	1	975.4	1	1213
True	B	11	0	0	5	4	716	41	-269	1442	[648,1,780,83]	124.7	0.953	8	6	361	0.1638	31	0.02219	22	0.0004987	2	0.0003172	31	3184	2	348.7
True	B	11	0	0	5	5	936	30	-206	1442	[889,1,973,104]	104.7	0.9773	9	7	250	0.1454	24	0.02046	8	0.0002169	1	0.0003706	24	3116	1	351.9
True	B	11	0	0	5	6	860	30	-228	1443	[827,1,889,69]	111.5	0.9733	10	8	246	0.1359	21	0.01681	39	0.008832	4	0.002525	21	2308	4	1524
True	B	11	0	0	5	7	982	35	-192	1442	[951,1,1009,72]	103.8	0.9625	11	9	339	0.1339	31	0.02666	13	0.002169	1	0.0006693	31	2481	1	519.8
True	B	11	0	0	5	8	802	55	-243	1436	[776,24,837,86]	109	0.9238	12	10	356	0.133	35	0.02867	22	0.01483	2	0.001276	35	3865	2	795.9
True	B	11	0	0	5	9	892	61	-218	1434	[854,28,918,94]	80.79	0.9154	13	11	180	0.1256	15	0.01657	19	0.0005665	2	0.001401	15	2959	2	299.1
True	B	11	0	0	5	10	1004	82	-185	1427	[954,51,1036,119]	57.4	0.9217	15	12	47	0.03239	5	0.007776	0	0	0	0	5	1009	0	NaN
True	B	11	0	0	5	11	801	104	-244	1422	[774,81,835,129]	69.19	0.9173	16	13	164	0.1088	16	0.02065	0	0	0	0	16	3582	0	NaN
True	B	11	0	0	5	12	629	707	-296	1242	[600,683,663,734]	85.79	0.9588	17	14	278	0.1745	25	0.02601	44	0.02147	4	0.003534	25	4325	4	671.5
True	B	11	0	0	5	13	136	923	-444	1175	[91,886,174,970]	137.6	0.8853	18	15	290	0.1656	23	0.01493	0	0	0	0	23	2175	0	NaN
True	B	11	0	0	5	14	176	882	-432	1192	[126,814,224,915]	124.7	0.9986	19	16	282	0.1276	27	0.01933	0	0	0	0	27	2213	0	NaN
True	B	11	0	0	5	15	52	951	-470	1167	[1,913,83,1004]	136.8	0.978	20	17	389	0.1453	32	0.02089	0	0	0	0	32	2068	0	NaN
True	B	11	0	0	6	1	940	25	119	1445	[910,1,964,56]	125.4	0.9831	9	7	385	0.1224	35	0.02491	26	0.05701	2	0.002415	35	2702	2	1459
True	B	11	0	0	6	2	185	31	-107	1443	[152,1,221,64]	94.9	0.886	10	8	234	0.1493	19	0.01787	0	0	0	0	19	3229	0	NaN
True	B	11	0	0	6	3	332	28	-63	1445	[289,1,364,67]	53.65	0.7874	11	9	11	0.001099	1	0.001664	0	0	0	0	1	319.6	0	NaN
True	B	11	0	0	6	4	713	44	49	1441	[652,1,762,93]	71.6	0.936	12	10	192	0.1262	17	0.0212	39	0.009941	3	0.0005474	17	3256	3	1533
True	B	11	0	0	6	5	842	35	90	1442	[808,9,878,66]	83.83	0.9677	13	11	265	0.141	24	0.02556	13	0.03344	1	0.0007027	24	3364	1	3065
True	B	11	0	0	6	6	988	47	135	1440	[956,1,1017,83]	119.8	0.9852	14	12	337	0.1096	32	0.02385	63	0.04316	5	0.002834	32	2696	5	1037
True	B	11	0	0	6	7	1036	34	149	1442	[1011,1,1078,68]	121.9	0.8987	15	13	305	0.1187	29	0.02125	0	0	0	0	29	2096	0	NaN
True	B	11	0	0	6	8	125	52	-125	1436	[84,16,156,101]	138.5	0.9427	16	14	430	0.153	38	0.0245	13	0.02108	1	0.0004794	38	2580	1	2296
True	B	11	0	0	6	9	296	61	-73	1433	[262,33,331,93]	107.9	0.9274	18	16	404	0.1555	36	0.02978	0	0	0	0	36	3409	0	NaN
True	B	11	0	0	6	10	61	80	-141	1427	[34,54,99,117]	93.82	0.9074	19	17	299	0.1245	27	0.02569	13	0.01405	1	0.0007337	27	2981	1	1644
True	B	11	0	0	6	11	421	72	-40	1430	[346,32,460,112]	67.76	0.906	20	18	185	0.1215	17	0.0224	61	0.002741	6	0.001078	17	4253	6	842.5
True	B	11	0	0	6	12	231	87	-94	1426	[202,69,252,109]	65.88	0.9366	21	19	145	0.1087	13	0.01762	65	0.08081	5	0.006135	13	3202	5	1527
True	B	11	0	0	6	13	31	113	-151	1418	[4,86,68,141]	64.19	0.8461	22	20	20	0.0009276	2	0.002782	13	0.03286	1	0.0006988	2	485.6	1	2608
True	B	11	0	0	6	14	130	134	-124	1414	[97,88,156,169]	96.32	0.9709	24	21	229	0.1118	21	0.01946	65	0.02536	6	0.003203	21	3092	6	871.2
True	B	11	0	0	6	15	177	127	-108	1414	[153,102,209,154]	79.9	0.8993	25	22	180	0.1239	17	0.01899	24	0.033	2	0.001898	17	3350	2	984.9
True	B	11	0	0	6	16	384	136	-47	1413	[351,106,415,166]	70.97	0.9543	26	23	190	0.1596	16	0.02013	25	0.008368	2	0.001112	16	2489	2	995.1
True	B	11	0	0	6	17	227	140	-94	1410	[190,121,260,162]	107.7	0.8748	27	24	293	0.1225	26	0.02156	39	0.1196	3	0.004184	26	3014	3	2116
True	B	11	0	0	6	18	74	139	-138	1411	[43,109,110,170]	52.76	0.9399	28	25	97	0.09968	8	0.01354	20	0.0005659	2	0.0008857	8	2013	2	351.5
True	B	11	0	0	7	1	308	26	253	1444	[267,1,354,64]	75.17	0.9184	5	4	184	0.1263	17	0.02019	13	0.002338	1	0.0003221	17	3814	1	722.2
True	B	11	0	0	7	2	672	34	363	1442	[661,23,689,47]	49.46	0.8789	6	5	13	0.08041	1	0.001805	0	NaN	0	NaN	1	3118	0	NaN
True	B	11	0	0	7	3	255	992	237	1156	[214,972,283,1017]	79.45	0.9271	7	6	283	0.1355	27	0.03034	26	0.06841	2	0.002092	27	3353	2	2773
True	B	11	0	0	7	4	319	1002	257	1153	[288,975,345,1027]	97.57	0.9679	8	7	398	0.1456	38	0.03477	13	0.06302	1	0.001159	38	3572	1	2904
True	B	11	0	0	7	5	235	1026	233	1146	[216,1006,260,1054]	88.91	0.99	9	8	268	0.1277	26	0.0261	31	0.0492	3	0.005484	26	2929	3	1949
True	B	11	0	0	8	1	815	29	728	1444	[789,1,845,60]	144.9	0.9761	6	6	380	0.1303	32	0.01972	38	0.07522	3	0.002865	32	2641	3	1832
True	B	11	0	0	8	2	504	22	635	1445	[475,1,530,59]	59.9	0.9084	7	7	143	0.1086	13	0.01937	30	0.009604	3	0.00196	13	2080	3	855.7
True	B	11	0	0	8	3	462	36	623	1443	[436,1,492,68]	101.5	0.9697	8	8	252	0.1378	22	0.01935	10	0.0005158	1	0.0006549	22	3198	1	654.6
True	B	11	0	0	8	4	1028	37	791	1442	[1006,20,1047,54]	77.04	0.9427	9	9	228	0.1211	22	0.02549	26	0.136	2	0.01527	22	2346	2	1231
True	B	11	0	0	8	5	258	61	562	1433	[224,31,294,97]	95.34	0.9862	10	10	180	0.1266	17	0.01592	35	0.009574	3	0.001474	17	2784	3	759.5
True	B	11	0	0	8	6	977	66	776	1434	[941,27,1007,99]	79.99	0.9415	11	11	261	0.1523	22	0.02455	13	0.000992	1	0.0004888	22	2308	1	513.6
True	B	11	0	0	8	7	208	90	547	1425	[179,62,244,119]	58.65	0.8416	12	12	78	0.07497	7	0.01065	0	0	0	0	7	2313	0	NaN
True	B	11	0	0	8	8	894	109	752	1422	[854,66,930,142]	115.3	0.9366	13	13	267	0.1413	23	0.0178	11	0.0001629	1	0.0003774	23	3193	1	425.7
True	B	11	0	0	8	9	997	173	783	1401	[961,138,1036,210]	126.7	0.9192	15	14	441	0.1356	42	0.0296	38	0.03467	3	0.001514	42	3592	3	1197
True	B	11	0	0	8	10	883	208	749	1392	[856,174,914,234]	100.6	0.9078	16	15	235	0.1289	21	0.01863	26	0.0329	2	0.001862	21	3944	2	1357
True	B	11	0	0	9	1	86	24	837	1446	[59,1,137,47]	53.03	0.8791	5	5	65	0.05407	5	0.008418	10	0.0002383	1	0.0004299	5	1680	1	376
True	B	11	0	0	9	2	348	27	913	1445	[320,1,404,66]	90.16	0.9444	6	6	300	0.1227	28	0.02772	31	0.001341	3	0.001326	28	4121	3	385.8
True	B	11	0	0	9	3	777	35	1042	1442	[744,8,820,68]	95.25	0.9544	7	7	293	0.1443	25	0.02343	22	0.02358	2	0.001095	25	3252	2	1476
True	B	11	0	0	9	4	489	37	954	1441	[460,12,520,64]	110.8	0.9063	8	8	343	0.1216	33	0.02659	70	0.04211	6	0.005703	33	3323	6	1243
True	B	11	0	0	9	5	296	51	895	1436	[257,16,330,97]	115.2	0.9819	9	9	310	0.09664	30	0.02326	26	0.02892	2	0.001055	30	3807	2	2100
True	B	11	0	0	9	6	564	54	975	1436	[529,17,596,90]	92.66	1.003	10	10	174	0.06976	17	0.01638	0	0	0	0	17	2344	0	NaN
True	B	11	0	0	9	7	222	60	874	1434	[189,31,260,98]	102.4	0.9172	11	11	267	0.1111	23	0.02005	0	0	0	0	23	3271	0	NaN
True	B	11	0	0	9	8	379	76	920	1430	[346,53,406,97]	78.83	0.9668	12	12	249	0.1401	23	0.02605	36	0.05981	3	0.003841	23	4322	3	1317
True	B	11	0	0	9	9	801	84	1047	1428	[775,51,830,114]	102.5	0.9652	13	13	387	0.1229	37	0.03223	13	0.01575	1	0.0009747	37	4192	1	1201
True	B	11	0	0	9	10	932	84	1087	1428	[907,49,967,112]	95.07	0.9534	14	14	192	0.1039	16	0.01502	39	0.0569	3	0.002336	16	2768	3	1817
True	B	11	0	0	9	11	851	93	1061	1428	[820,35,878,122]	119.5	0.9653	15	15	357	0.1362	32	0.0239	31	0.02128	3	0.001587	32	2711	3	970.8
True	B	11	0	0	9	12	438	106	939	1422	[402,60,481,144]	132.9	0.9287	16	16	371	0.1205	32	0.02149	13	0.01441	1	0.0003821	32	3075	1	2462
True	B	11	0	0	9	13	974	125	1098	1417	[934,78,1007,157]	117.9	0.9141	18	18	271	0.1299	24	0.01817	0	0	0	0	24	2739	0	NaN
True	B	11	0	0	9	14	351	138	912	1411	[319,102,377,167]	73.56	0.8963	19	19	185	0.1268	16	0.01942	60	0.009635	5	0.002914	16	3109	5	749.9
True	B	11	0	0	9	15	75	131	829	1414	[51,99,97,157]	72.85	0.861	20	20	130	0.08211	12	0.01471	63	0.03663	5	0.004292	12	3607	5	1217
True	B	11	0	0	9	16	128	143	846	1411	[85,102,179,179]	50.8	0.9058	21	21	64	0.04605	5	0.008787	12	0.0001604	1	0.0002367	5	1743	1	315.1
True	B	11	0	0	9	17	307	201	898	1392	[268,173,337,227]	104.3	0.9456	24	22	291	0.1364	26	0.02226	0	0	0	0	26	3023	0	NaN
True	B	11	0	0	9	18	279	238	891	1382	[250,207,310,268]	68.47	0.9117	25	23	227	0.1449	22	0.02868	0	0	0	0	22	3888	0	NaN
True	B	11	0	0	9	19	333	248	908	1378	[300,214,365,290]	79.45	0.8768	26	24	158	0.1028	13	0.01461	26	0.01643	2	0.0007921	13	2859	2	1730
True	B	11	0	0	10	1	482	22	1276	1447	[437,1,526,43]	90.16	0.9547	3	3	278	0.1249	25	0.02475	0	0	0	0	25	3494	0	NaN
True	B	11	0	0	10	2	182	29	1185	1445	[147,1,214,59]	87.04	0.9252	4	4	204	0.115	17	0.01744	75	0.01887	7	0.0039	17	2162	7	1084
True	B	11	0	0	10	3	609	37	1312	1442	[583,5,636,65]	87.66	0.9602	5	5	197	0.1481	17	0.01731	13	0.01429	1	0.0009116	17	3142	1	1661
True	B	11	0	0	10	4	726	41	1348	1441	[696,1,761,73]	113.4	0.9925	6	6	418	0.141	38	0.02992	33	0.01098	3	0.001749	38	3456	3	626.4
True	B	11	0	0	10	5	868	50	1390	1438	[839,9,908,82]	79.27	0.8853	7	7	185	0.1158	16	0.01802	20	0.00253	2	0.0009965	16	2875	2	570.9
True	B	11	0	0	10	6	914	39	1403	1441	[887,15,937,71]	47.85	0.8739	8	8	23	0.005888	3	0.005597	13	0.03247	1	0.0007704	3	940	1	2737
True	B	11	0	0	10	7	966	62	1419	1435	[929,29,1003,101]	86.68	0.913	9	9	220	0.1315	19	0.01957	26	0.01675	2	0.0007902	19	2814	2	1414
True	B	11	0	0	10	8	581	65	1304	1433	[551,38,613,96]	84.09	0.9807	10	10	157	0.128	13	0.0138	0	0	0	0	13	2549	0	NaN
True	B	11	0	0	10	9	1013	98	1433	1424	[979,76,1044,119]	97.57	0.8917	11	11	239	0.1304	21	0.01921	24	0.01533	3	0.004161	21	2544	3	1353
True	B	11	0	0	10	10	608	110	1312	1420	[582,86,638,138]	113.7	0.9203	12	12	238	0.1028	21	0.01648	52	0.1031	4	0.004154	21	3702	4	2782
True	B	11	0	0	10	11	957	114	1416	1419	[921,81,985,149]	106.9	0.9136	13	13	357	0.1192	35	0.02922	25	0.02322	2	0.001495	35	3346	2	1435
True	B	11	0	0	10	12	505	113	1282	1418	[472,79,538,156]	69.1	0.8636	14	14	0	0	0	0	0	0	0	0	0	NaN	0	NaN
True	B	11	0	0	10	13	835	121	1379	1418	[802,84,862,153]	97.39	0.9772	15	15	283	0.1188	27	0.02475	13	0.0007155	1	0.0005371	27	3886	1	298.5
True	B	11	0	0	10	14	722	137	1346	1412	[684,100,757,169]	121.3	0.9554	16	16	316	0.1618	29	0.02134	28	0.01984	3	0.001425	29	3368	3	1153
True	B	11	0	0	10	15	792	186	1367	1398	[764,149,823,216]	61.69	1.002	17	17	159	0.1238	15	0.02171	0	0	0	0	15	2939	0	NaN
True	B	11	0	0	10	16	52	918	1147	1179	[23,884,86,948]	103.2	0.9592	18	18	302	0.1028	30	0.02595	0	0	0	0	30	2742	0	NaN
True	B	11	0	0	10	17	770	101	1362	1421	[737,69,810,143]	160.1	0.9432	19	19	470	0.1357	42	0.02342	0	0	0	0	42	3820	0	NaN
True	B	11	0	0	10	18	560	134	1297	1413	[524,95,596,171]	133.8	0.9924	20	20	352	0.1166	31	0.02068	13	0.02635	1	0.00049	31	3319	1	3196
True	B	11	0	0	10	19	586	195	1306	1395	[542,155,631,230]	140.1	0.9329	21	21	495	0.1425	46	0.02932	13	0.001194	1	0.0003736	46	3664	1	589.5
True	B	11	0	0	11	1	1006	316	1108	1036	[979,288,1037,343]	99.09	0.987	2	2	291	0.1528	26	0.02342	12	0.001054	1	0.0008718	26	3017	1	277.5
True	B	11	0	0	11	2	1038	851	1120	876	[1006,819,1078,882]	136	0.8579	5	4	381	0.1344	36	0.02364	0	0	0	0	36	3421	0	NaN
True	B	11	0	0	12	1	552	315	328	1036	[526,291,590,343]	64.28	0.9231	1	1	54	0.05238	6	0.008333	28	0.003277	3	0.001947	6	2144	3	487.7
True	B	11	0	0	12	2	590	347	338	1026	[555,311,622,380]	122.9	0.9196	2	2	297	0.1364	28	0.02033	0	0	0	0	28	4581	0	NaN
True	B	11	0	0	12	3	630	401	351	1010	[601,376,665,427]	89	0.9476	3	3	304	0.1148	30	0.03009	18	0.005678	2	0.001642	30	4689	2	1023
True	B	11	0	0	13	1	941	712	-203	917	[905,680,978,746]	122.5	0.9431	1	1	381	0.1362	34	0.02478	13	0.03247	1	0.0005988	34	3941	1	2913
True	B	11	0	0	13	2	1035	964	-175	841	[983,929,1078,1003]	62.13	0.9164	2	2	174	0.1177	16	0.02299	10	0.0001542	1	0.0002289	16	2439	1	431.4
True	B	11	0	0	13	3	1044	1021	-175	826	[971,977,1078,1052]	132.1	0.9336	3	3	359	0.1089	33	0.0223	45	0.006945	4	0.00127	33	2651	4	682
True	B	11	0	0	13	4	1059	1057	-168	814	[1030,1036,1078,1078]	53.12	0.7188	6	6	34	0.01321	3	0.005042	0	0	0	0	3	821.2	0	NaN
True	B	11	0	0	14	1	1053	411	-816	1005	[1028,379,1078,464]	95.61	0.9565	1	1	314	0.1504	29	0.02708	13	0.02412	1	0.0005942	29	3663	1	2219
True	B	11	0	0	14	2	1005	425	-831	1003	[964,405,1036,447]	106.1	0.9455	2	2	402	0.1517	37	0.03114	13	0.02769	1	0.0009551	37	3262	1	1641
True	B	11	0	0	14	3	946	478	-847	988	[915,444,985,507]	127.5	0.974	3	3	355	0.163	31	0.02171	0	0	0	0	31	3510	0	NaN
True	B	11	0	0	14	4	967	525	-840	974	[934,486,1008,556]	124.8	0.9622	4	4	378	0.1434	35	0.02504	26	0.00864	2	0.001195	35	3381	2	489
True	B	11	0	0	14	5	910	591	-859	954	[871,564,939,617]	106.1	0.9845	5	5	385	0.1683	36	0.0303	26	0.05752	2	0.001664	36	3900	2	2136
True	B	11	0	0	14	6	468	734	-991	909	[432,709,497,768]	96.32	0.9607	6	6	384	0.1478	37	0.03429	52	0.1445	4	0.003976	37	4459	4	2860
True	B	11	0	0	14	7	568	740	-960	908	[531,711,601,773]	108.9	0.9602	7	7	353	0.194	31	0.02541	0	0	0	0	31	3274	0	NaN
True	B	11	0	0	14	8	728	783	-913	896	[696,765,755,802]	41.78	0.8943	8	8	108	0.1346	10	0.02137	0	0	0	0	10	3364	0	NaN
True	B	11	0	0	14	9	633	801	-941	889	[602,775,666,846]	143.2	0.9213	9	9	521	0.1782	47	0.0293	26	0.07648	2	0.001572	47	3970	2	3392
True	B	11	0	0	14	10	758	807	-903	887	[736,782,780,842]	123.6	0.9311	10	10	308	0.1339	27	0.01949	26	0.1085	2	0.003906	27	3792	2	2143
True	B	11	0	0	14	11	678	813	-928	887	[651,790,703,847]	89.72	0.8319	11	11	237	0.1443	20	0.0199	58	0.02009	5	0.005258	20	2314	5	1019
True	B	11	0	0	14	12	720	817	-914	885	[701,799,739,845]	71.77	0.9726	12	12	199	0.1377	17	0.02114	0	0	0	0	17	3280	0	NaN
True	B	11	0	0	14	13	794	838	-893	880	[763,800,823,866]	58.83	0.8646	13	13	31	0.008198	3	0.004552	0	0	0	0	3	1443	0	NaN
True	B	11	0	0	14	14	697	853	-921	873	[670,825,726,899]	140.8	0.9436	14	14	508	0.1684	47	0.0298	39	0.02801	3	0.002016	47	3635	3	1124
True	B	11	0	0	14	15	645	854	-937	874	[616,827,672,885]	106.6	0.9873	15	15	427	0.1864	38	0.03183	26	0.04459	2	0.001972	38	3904	2	1280
True	B	11	0	0	14	16	850	1002	-876	830	[826,974,874,1036]	122.2	0.987	16	16	344	0.1888	32	0.02337	26	0.1087	2	0.003802	32	2956	2	2576
True	B	11	0	0	14	17	822	1043	-885	818	[787,1010,857,1078]	123.4	0.9738	17	17	360	0.1718	34	0.0246	0	0	0	0	34	3022	0	NaN
True	B	11	0	0	15	1	400	28	-1333	799	[373,1,436,56]	121.5	0.9474	2	2	396	0.1308	37	0.02719	31	0.02541	3	0.002147	37	3844	3	1213
True	B	11	0	0	15	2	271	31	-1371	798	[235,1,350,85]	77.58	0.9142	3	3	209	0.1481	17	0.01956	26	0.008663	2	0.00058	17	3375	2	1021
True	B	11	0	0	15	3	201	94	-1395	781	[159,51,234,122]	79.9	0.8894	4	4	272	0.1605	23	0.0257	25	0.003273	2	0.0009625	23	3255	2	505.8
True	B	11	0	0	15	4	421	98	-1328	777	[387,73,449,125]	98.56	0.9435	5	5	329	0.1211	32	0.02899	39	0.03217	4	0.003177	32	4540	4	1022
True	B	11	0	0	15	5	175	132	-1403	762	[142,92,197,211]	104	0.8652	7	6	269	0.1339	24	0.0206	33	0.01903	3	0.001144	24	2689	3	1672
True	B	11	0	0	15	6	219	147	-1388	761	[185,112,252,188]	93.82	0.9665	8	7	265	0.1653	23	0.02188	13	0.01946	1	0.000469	23	3464	1	2440
True	B	11	0	0	15	7	286	148	-1368	764	[259,114,311,172]	74.27	0.9227	9	8	109	0.1251	10	0.01202	0	0	0	0	10	3624	0	NaN
True	B	11	0	0	15	8	365	189	-1344	748	[332,149,398,251]	166.8	0.8612	10	9	511	0.1436	48	0.0257	31	0.008625	3	0.001099	48	3862	3	814.6
True	B	11	0	0	15	9	226	210	-1383	742	[185,181,280,254]	117.6	0.9471	11	10	431	0.1235	42	0.03189	23	0.0223	2	0.0008783	42	4249	2	1743
True	B	11	0	0	15	10	507	225	-1302	740	[477,195,536,258]	103.4	0.9223	12	11	226	0.1463	19	0.01641	47	0.04942	4	0.002721	19	3725	4	1381
True	B	11	0	0	15	11	420	270	-1328	726	[365,228,473,309]	171.5	0.8565	13	12	398	0.1633	34	0.0177	24	0.01548	2	0.0007055	34	3684	2	1201
True	B	11	0	0	15	12	516	302	-1297	716	[481,261,568,340]	193.7	0.8242	14	13	552	0.1771	47	0.02166	67	0.03025	6	0.002774	47	3842	6	941.5
True	B	11	0	0	15	13	225	321	-1387	711	[182,276,256,365]	92.48	0.8727	15	14	223	0.1607	19	0.01834	26	0.01031	2	0.0007776	19	3749	2	944.4
True	B	11	0	0	15	14	397	331	-1334	708	[368,300,439,363]	167.2	0.9227	16	15	435	0.178	39	0.02082	39	0.07716	3	0.002755	39	4451	3	2089
True	B	11	0	0	15	15	156	322	-1407	708	[119,256,186,403]	118.8	0.944	17	16	294	0.1482	24	0.01803	0	0	0	0	24	2337	0	NaN
True	B	11	0	0	15	16	205	375	-1392	696	[171,329,242,412]	143.1	0.9287	18	17	478	0.1497	42	0.0262	26	0.01899	2	0.001085	42	3593	2	1211
True	B	11	0	0	15	17	478	385	-1309	693	[446,334,513,417]	117.5	0.9378	19	18	400	0.1438	37	0.02812	13	0.001297	1	0.0004995	37	4213	1	308.1
True	B	11	0	0	15	18	429	426	-1325	680	[400,393,460,459]	125.8	0.9319	20	19	296	0.137	29	0.02058	13	0.04792	1	0.001012	29	4309	1	2853
True	B	11	0	0	15	19	155	457	-1407	668	[122,408,188,523]	92.31	0.9574	21	20	220	0.119	19	0.01838	0	0	0	0	19	3291	0	NaN
True	B	11	0	0	15	20	482	518	-1308	653	[446,482,531,554]	122.9	0.9279	22	21	420	0.15	40	0.02905	31	0.01914	3	0.00149	40	4891	3	1123
True	B	11	0	0	15	21	376	563	-1340	640	[341,507,408,616]	163.5	0.8391	23	22	533	0.1612	49	0.02675	73	0.07624	6	0.002236	49	4517	6	3251
True	B	11	0	0	15	22	422	541	-1327	644	[401,513,442,575]	88.91	0.9072	24	23	268	0.1317	24	0.0241	13	0.04176	1	0.001055	24	3409	1	2277
True	B	11	0	0	15	23	505	560	-1302	640	[479,534,533,583]	82.49	0.8867	25	24	262	0.1446	24	0.02597	52	0.1209	4	0.00453	24	3341	4	3077
True	B	11	0	0	15	24	241	556	-1381	641	[201,508,280,608]	114.2	0.94	26	25	287	0.1612	25	0.01955	25	0.02315	2	0.0007536	25	3536	2	2780
True	B	11	0	0	15	25	457	581	-1316	634	[432,542,482,615]	122.7	0.9271	27	26	419	0.159	40	0.02909	13	0.04173	1	0.0009074	40	4243	1	3476
True	B	11	0	0	15	26	263	601	-1374	627	[232,561,298,642]	114.6	0.9074	28	27	423	0.1483	42	0.03271	0	0	0	0	42	4259	0	NaN
True	B	11	0	0	15	27	519	598	-1297	628	[493,579,548,619]	87.93	0.9207	29	28	218	0.1697	18	0.01827	3	0	1	0.001504	18	3871	1	364
True	B	11	0	0	15	28	165	601	-1405	631	[128,520,203,653]	80.17	0.9649	30	29	203	0.1321	18	0.02004	26	0.01028	2	0.0003157	18	3509	2	2167
True	B	11	0	0	15	29	570	605	-1283	626	[536,569,600,641]	93.38	0.9639	31	30	203	0.1362	18	0.01721	0	0	0	0	18	4524	0	NaN
True	B	11	0	0	15	30	519	636	-1299	616	[491,615,539,677]	82.75	0.9495	32	31	257	0.1597	23	0.02481	26	0.08338	2	0.001835	23	4061	2	3173
True	B	11	0	0	15	31	321	648	-1356	609	[288,623,352,715]	54.72	0.7871	33	32	73	0.1147	6	0.009788	0	0	0	0	6	1868	0	NaN
True	B	11	0	0	15	32	374	656	-1341	610	[351,632,397,682]	113.7	0.9469	34	33	282	0.1852	23	0.01805	39	0.1565	3	0.008287	23	3714	3	2161
True	B	11	0	0	15	33	416	667	-1329	608	[390,632,443,696]	111.9	0.84	35	34	327	0.1552	29	0.02313	30	0.004806	3	0.002915	29	3844	3	582.6
True	B	11	0	0	15	34	264	666	-1374	606	[209,640,315,725]	127	0.838	36	35	439	0.1598	40	0.02811	13	0.01529	1	0.0002851	40	3871	1	2088
True	B	11	0	0	15	35	470	686	-1312	602	[435,649,502,728]	114.5	0.9241	37	36	335	0.154	30	0.02338	13	0.02686	1	0.0005163	30	3174	1	2251
True	B	11	0	0	15	36	199	756	-1393	581	[161,720,239,796]	107	0.9412	38	37	407	0.1444	38	0.03169	13	0.005242	1	0.000387	38	4795	1	1015
True	B	11	0	0	15	37	497	784	-1305	574	[470,736,523,826]	141	0.8622	39	38	406	0.1457	36	0.0228	26	0.02048	2	0.001217	36	4431	2	1204
True	B	11	0	0	15	38	254	787	-1376	572	[217,729,302,828]	136	0.9328	40	39	397	0.18	35	0.02298	25	0.003531	2	0.0006369	35	2963	2	619.2
True	B	11	0	0	15	39	376	780	-1341	573	[341,749,408,821]	94.72	0.9124	41	40	276	0.1695	23	0.02168	33	0.02273	3	0.001775	23	3684	3	1336
True	B	11	0	0	15	40	419	801	-1328	567	[391,774,445,832]	69.27	0.8751	42	41	150	0.1119	12	0.01546	47	0.01272	4	0.002837	12	2498	4	1280
True	B	11	0	0	15	41	156	874	-1408	547	[116,753,201,964]	97.22	0.936	44	42	270	0.1537	25	0.02296	22	0.000477	2	0.0001973	25	3348	2	738
True	B	11	0	0	15	42	236	853	-1382	548	[207,822,266,914]	125.7	0.8835	45	43	399	0.1535	38	0.02699	13	0.01276	1	0.0004545	38	4414	1	1340
True	B	11	0	0	15	43	527	854	-1296	552	[488,825,556,888]	117.1	0.8627	46	44	411	0.1396	39	0.02973	35	0.04686	3	0.002234	39	4169	3	1598
True	B	11	0	0	15	44	347	850	-1348	552	[308,808,395,897]	108.6	0.9494	47	45	378	0.1379	36	0.02958	36	0.01852	3	0.0007895	36	4683	3	1734
True	B	11	0	0	15	45	503	877	-1301	544	[478,852,531,911]	70.88	0.7677	48	46	81	0.1349	7	0.008816	10	0.005201	1	0.001919	7	2247	1	423
True	B	11	0	0	15	46	285	913	-1368	533	[254,886,309,950]	129.9	0.8853	49	47	342	0.1485	31	0.02131	36	0.01992	4	0.004459	31	4028	4	1886
True	B	11	0	0	15	47	581	950	-1278	522	[550,912,614,998]	116.3	0.9068	50	48	469	0.1641	45	0.03454	0	0	0	0	45	3746	0	NaN
True	B	11	0	0	15	48	498	965	-1304	518	[465,938,526,999]	115.3	0.9546	51	49	322	0.1365	30	0.02322	13	0.004864	1	0.001143	30	3869	1	422.4
True	B	11	0	0	15	49	436	971	-1323	516	[401,943,462,1007]	113.7	0.8405	52	50	393	0.1827	34	0.02669	46	0.03947	4	0.003265	34	3239	4	1512
True	B	11	0	0	15	50	272	980	-1371	515	[241,945,313,1018]	127	0.9207	53	51	450	0.1716	42	0.02952	0	0	0	0	42	4168	0	NaN
True	B	11	0	0	15	51	545	982	-1290	514	[518,939,573,1010]	99.18	0.9669	54	52	375	0.1712	35	0.0315	0	0	0	0	35	4048	0	NaN
True	B	11	0	0	15	52	998	997	-1155	510	[985,973,1010,1014]	51.15	0.8603	55	53	48	0.1214	4	0.006981	44	0.1442	4	0.02353	4	2150	4	1471
True	B	11	0	0	15	53	491	1008	-1306	506	[463,967,521,1041]	101.5	0.8861	56	54	281	0.1655	24	0.02111	10	0.000183	1	0.0007407	24	3461	1	393.8
True	B	11	0	0	15	54	310	1011	-1360	504	[280,987,345,1051]	107.4	0.9619	57	55	374	0.1669	34	0.02826	26	0.0642	2	0.001571	34	3846	2	2545
True	B	11	0	0	15	55	239	1012	-1382	506	[211,954,272,1045]	107.7	0.9731	58	56	413	0.1741	39	0.03234	23	0.002296	2	0.001047	39	3738	2	349.1
True	B	11	0	0	15	56	378	1028	-1340	501	[355,997,401,1049]	126.5	0.9266	59	57	419	0.1355	39	0.02752	26	0.0643	2	0.007353	39	4057	2	1014
True	B	11	0	0	15	57	431	1025	-1324	498	[399,993,465,1078]	113.6	0.9649	60	58	417	0.1192	39	0.03064	57	0.05399	5	0.002058	39	4513	5	2656
True	B	11	0	0	15	58	166	1002	-1401	501	[117,949,254,1078]	196.4	0.7467	61	59	491	0.1179	46	0.02091	264	0.0502	21	0.002074	46	2989	21	1910
True	B	11	0	0	15	59	529	74	-1294	783	[498,45,562,121]	181.3	0.9593	63	61	554	0.1477	51	0.02511	39	0.06961	3	0.004478	51	3833	3	1491
True	B	11	0	0	15	60	279	199	-1371	749	[224,154,321,245]	185.9	0.8725	64	62	608	0.1707	55	0.02642	0	0	0	0	55	4060	0	NaN
True	B	11	0	0	15	61	467	325	-1314	709	[437,299,492,354]	146	0.9805	65	63	450	0.1473	42	0.02567	13	0.07221	1	0.001873	42	4643	1	2661
True	B	11	0	0	15	62	318	388	-1359	691	[264,338,364,445]	151	0.9823	66	64	462	0.154	43	0.02543	0	0	0	0	43	3570	0	NaN
True	B	11	0	0	15	63	375	466	-1343	667	[308,414,410,514]	164.7	0.9743	67	65	598	0.1764	54	0.02927	26	0.007238	2	0.0005687	54	4211	2	685.7
True	B	11	0	0	15	64	167	690	-1405	600	[120,629,219,757]	139.3	0.9883	68	66	368	0.1159	34	0.02179	0	0	0	0	34	2844	0	NaN
True	B	11	0	0	15	65	460	841	-1317	554	[417,810,494,886]	145.9	1.015	69	67	227	0.1427	20	0.01224	13	0.005481	1	0.0005311	20	1893	1	578.6
True	B	11	0	0	15	66	476	908	-1312	536	[419,862,512,954]	178	0.9714	70	68	313	0.1738	27	0.01354	0	0	0	0	27	2274	0	NaN
True	B	11	0	0	16	1	755	131	-583	768	[714,100,781,163]	80.61	0.9458	1	1	270	0.1577	23	0.02547	39	0.0333	3	0.002201	23	3621	3	1287
True	B	11	0	0	18	1	75	993	507	509	[39,955,111,1041]	111.1	0.9711	1	1	289	0.169	26	0.0209	13	0.001035	1	0.000466	26	2803	1	327.3
True	B	11	0	0	19	1	634	650	1319	613	[581,609,689,688]	114.5	0.8366	4	1	69	0.02785	6	0.004677	0	0	0	0	6	766.4	0	NaN
True	B	11	0	0	19	2	160	798	1178	568	[130,767,189,831]	150.5	0.9723	5	2	491	0.178	43	0.0255	39	0.05601	3	0.002876	43	3440	3	1633
True	B	11	0	0	19	3	943	257	1411	730	[884,224,986,295]	163.2	0.9537	6	3	380	0.1303	31	0.01696	26	0.004951	2	0.0007281	31	2169	2	584
True	B	11	0	0	19	4	1034	939	1440	525	[992,877,1078,1005]	197.9	0.9646	7	4	351	0.09213	30	0.01353	13	0.002066	1	0.0002201	30	1309	1	885.2
True	B	11	0	0	20	1	80	200	830	424	[41,167,113,233]	135	0.9209	1	1	518	0.1443	50	0.03307	39	0.02928	3	0.00157	50	3654	3	1305
True	B	11	0	0	20	2	744	1053	1030	169	[713,1026,776,1078]	93.47	0.944	2	2	242	0.1396	21	0.02006	13	0.01034	1	0.0007968	21	2748	1	971.4
True	B	11	0	0	21	1	414	93	283	456	[374,63,446,129]	117.7	0.9217	2	2	333	0.1428	29	0.02199	37	0.02074	3	0.001616	29	3211	3	1008
True	B	11	0	0	21	2	606	124	343	447	[579,87,633,158]	110.1	0.9956	3	3	307	0.1706	27	0.0219	26	0.03282	2	0.001708	27	3866	2	1960
True	B	11	0	0	21	3	416	152	285	438	[390,122,443,178]	91.06	0.9297	4	4	277	0.1401	28	0.02745	46	0.04866	4	0.003257	28	3478	4	1212
True	B	11	0	0	21	4	835	923	412	209	[798,891,866,956]	110.6	0.9141	5	5	359	0.1519	32	0.02583	50	0.01807	4	0.002118	32	3790	4	806
True	B	11	0	0	22	1	726	720	-267	271	[682,679,770,753]	147	0.8698	1	1	300	0.1561	24	0.01457	13	0.001813	1	0.0004274	24	2099	1	367.4
True	B	11	0	0	22	2	938	766	-204	255	[899,732,975,799]	127.8	1.003	2	2	413	0.1477	37	0.02584	24	0.01316	2	0.0009838	37	3315	2	882.3
True	B	11	0	0	22	3	774	759	-252	256	[730,715,815,811]	165.7	0.9395	3	3	405	0.1484	36	0.0194	26	0.007532	2	0.0007372	36	2879	2	802
True	B	11	0	0	23	1	824	31	-884	474	[795,1,852,76]	122.2	0.9165	1	1	418	0.1287	39	0.02849	13	0.01315	1	0.0005855	39	3330	1	1275
True	B	11	0	0	23	2	677	30	-926	475	[640,8,723,52]	46.6	0.8726	2	2	61	0.09533	5	0.009579	0	0	0	0	5	2338	0	NaN
True	B	11	0	0	23	3	753	55	-904	468	[722,23,793,86]	84.27	0.7706	3	3	91	0.1397	7	0.007415	128	0.122	10	0.005907	7	2233	10	2225
True	B	11	0	0	23	4	638	53	-939	467	[604,27,674,80]	76.86	0.899	4	4	243	0.1284	24	0.02787	25	0.00135	3	0.002066	24	4714	3	459.1
True	B	11	0	0	23	5	696	70	-923	463	[661,48,722,96]	101.3	0.949	5	5	335	0.1342	32	0.02819	0	0	0	0	32	3721	0	NaN
True	B	11	0	0	23	6	510	97	-979	457	[478,53,536,128]	100.3	0.9529	6	6	357	0.1053	34	0.03028	13	0.04053	1	0.0006223	34	3256	1	2666
True	B	11	0	0	23	7	749	106	-906	455	[721,66,785,128]	112.8	0.9704	7	7	370	0.148	32	0.02532	142	0.1447	11	0.01088	32	2967	11	2021
True	B	11	0	0	23	8	819	109	-887	451	[790,72,847,153]	121.8	0.8983	8	8	347	0.1468	30	0.02199	13	0.01345	1	0.0006983	30	3133	1	952.5
True	B	11	0	0	23	9	775	153	-898	437	[745,117,805,193]	121.6	0.9841	9	9	475	0.1312	44	0.03231	76	0.02875	6	0.003641	44	4286	6	722.3
True	B	11	0	0	23	10	476	179	-987	431	[450,149,509,210]	121.3	0.9293	10	10	338	0.142	31	0.02281	26	0.02711	2	0.002389	31	3130	2	842.3
True	B	11	0	0	23	11	512	199	-981	421	[463,176,534,246]	86.24	0.9617	11	11	154	0.1279	13	0.01346	65	0.06817	5	0.002772	13	1306	5	1585
True	B	11	0	0	23	12	775	252	-899	409	[752,218,800,278]	116.7	0.9703	12	12	380	0.1531	35	0.02678	13	0.0793	1	0.00129	35	3395	1	3232
True	B	11	0	0	23	13	925	281	-854	403	[892,235,952,312]	131.7	0.94	13	13	243	0.1766	20	0.01356	13	0.003545	1	0.0006143	20	2812	1	585.1
True	B	11	0	0	23	14	437	287	-1001	399	[392,243,469,320]	149.7	0.9694	14	14	386	0.1563	33	0.01968	26	0.01871	2	0.001111	33	3992	2	1030
True	B	11	0	0	23	15	384	325	-1016	388	[348,280,416,361]	147.2	0.8704	15	15	412	0.1972	35	0.02123	13	0.04153	1	0.0005444	35	3182	1	3482
True	B	11	0	0	23	16	473	371	-988	374	[451,338,497,389]	86.68	0.7914	16	16	68	0.04812	7	0.007209	79	0.1794	7	0.02035	7	1340	7	3231
True	B	11	0	0	23	17	383	439	-1015	352	[355,404,421,482]	146.2	0.9483	17	17	445	0.1504	40	0.02442	23	0.01199	2	0.001157	40	3354	2	905.8
True	B	11	0	0	23	18	355	516	-1024	330	[321,482,385,545]	115.2	0.9921	18	18	288	0.1722	25	0.01936	50	0.0757	4	0.002708	25	3354	4	1950
True	B	11	0	0	23	19	480	705	-984	272	[444,667,539,755]	125.5	0.9835	19	19	448	0.1622	43	0.03058	25	0.003274	2	0.0006133	43	3961	2	462.3
True	B	11	0	0	23	20	423	704	-1003	272	[390,673,452,748]	144.5	0.9499	20	20	451	0.1808	40	0.02471	0	0	0	0	40	3194	0	NaN
True	B	11	0	0	23	21	475	783	-988	250	[447,751,505,814]	118.7	0.9525	21	21	457	0.1729	41	0.03083	13	0.04616	1	0.0009166	41	3786	1	2837
True	B	11	0	0	23	22	427	808	-1001	241	[399,775,463,851]	110.1	0.9856	22	22	448	0.1348	44	0.03569	25	0.01984	2	0.0009881	44	4645	2	1188
True	B	11	0	0	23	23	321	826	-1035	236	[287,787,356,881]	136.3	0.985	23	23	547	0.1606	52	0.03405	0	0	0	0	52	4026	0	NaN
True	B	11	0	0	23	24	327	909	-1032	212	[307,887,354,943]	53.47	0.9209	24	24	137	0.1012	13	0.0217	0	0	0	0	13	2257	0	NaN
True	B	11	0	0	23	25	360	919	-1021	209	[326,898,407,942]	133.2	0.972	25	25	436	0.1481	41	0.02748	0	0	0	0	41	3663	0	NaN
True	B	11	0	0	23	26	293	939	-1043	204	[257,912,319,966]	82.04	0.8296	26	26	235	0.1447	22	0.02394	13	0.002771	1	0.0009191	22	3828	1	791.5
True	B	11	0	0	23	27	377	952	-1020	200	[316,922,405,982]	72.31	0.9191	27	27	90	0.01253	10	0.01235	0	0	0	0	10	841.3	0	NaN
True	B	11	0	0	23	28	254	961	-1054	194	[231,932,277,1007]	118.3	0.9594	28	28	425	0.1487	38	0.02868	24	0.0237	2	0.001592	38	3990	2	1090
True	B	11	0	0	23	29	420	969	-1006	194	[379,930,452,1004]	118.3	0.9686	29	29	379	0.1522	36	0.02717	13	0.04333	1	0.0006325	36	3772	1	3499
True	B	11	0	0	23	30	292	985	-1042	189	[269,956,323,1019]	98.2	0.9818	30	30	369	0.1378	37	0.03364	18	0.007045	2	0.002208	37	3963	2	3545
True	B	11	0	0	23	31	345	992	-1026	189	[309,952,387,1021]	150.7	0.9568	31	31	577	0.1696	52	0.03081	0	0	0	0	52	3790	0	NaN
True	B	11	0	0	23	32	443	1014	-998	179	[410,982,474,1064]	138.3	0.9585	32	32	445	0.1622	40	0.02582	0	0	0	0	40	3107	0	NaN
True	B	11	0	0	23	33	211	1031	-1065	175	[186,991,249,1073]	113.9	0.9569	33	33	337	0.1278	33	0.02586	13	0.02335	1	0.000672	33	3078	1	1884
True	B	11	0	0	23	34	257	1028	-1053	176	[230,999,286,1057]	98.73	0.9849	34	34	337	0.1274	31	0.02803	13	0.02274	1	0.001062	31	4096	1	1887
True	B	11	0	0	23	35	310	1026	-1038	177	[275,1003,334,1058]	109	0.9419	35	35	363	0.1942	31	0.02539	11	0.003037	1	0.001529	31	3680	1	503.7
True	B	11	0	0	23	36	556	1029	-963	177	[523,995,589,1068]	134.4	0.9861	36	36	366	0.1627	32	0.02125	0	0	0	0	32	2981	0	NaN
True	B	11	0	0	23	37	760	1041	-902	174	[711,999,802,1078]	169	0.9428	37	37	494	0.1539	42	0.02219	13	0.01821	1	0.000339	42	3450	1	2871
True	B	11	0	0	23	38	429	211	-1002	420	[392,173,472,255]	152.1	0.9866	41	41	403	0.1352	37	0.02171	62	0.01387	5	0.001953	37	3622	5	648
True	B	11	0	0	23	39	716	336	-916	384	[685,293,749,376]	148.8	1.017	42	42	499	0.1578	46	0.02759	26	0.01925	2	0.0009606	46	3504	2	1425
True	B	11	0	0	23	40	402	379	-1011	370	[359,340,438,416]	159.7	0.973	43	43	425	0.151	38	0.02124	24	0.0228	2	0.001047	38	3449	2	1735
True	B	11	0	0	23	41	448	439	-997	354	[408,402,481,471]	164.3	0.9653	44	44	424	0.137	40	0.02173	52	0.1035	4	0.002896	40	3530	4	2327
True	B	11	0	0	23	42	543	680	-969	278	[505,643,577,736]	152.7	0.9889	45	45	420	0.1313	40	0.02338	39	0.006796	3	0.001314	40	3570	3	667.5
True	B	11	0	0	23	43	606	840	-947	235	[544,772,682,906]	298.9	0.7015	46	46	288	0.0713	25	0.007467	51	0.008386	4	0.0009508	25	935.6	4	569.2
True	B	11	0	0	23	44	364	798	-1020	246	[339,775,400,823]	149.7	0.9694	47	47	378	0.1525	35	0.02087	37	0.1508	3	0.006522	35	3035	3	2507
True	B	11	0	0	23	45	365	867	-1019	225	[328,823,411,912]	245	0.8401	48	48	715	0.1661	65	0.02368	13	0.007932	1	0.0005731	65	3183	1	901.5
True	B	11	0	0	23	46	719	884	-914	220	[680,835,761,929]	181.3	0.9817	49	49	462	0.1502	41	0.02019	39	0.03387	3	0.001139	41	2999	3	1477
True	B	11	0	0	23	47	629	960	-943	198	[589,923,668,995]	182.2	0.9548	50	50	492	0.1606	42	0.02058	39	0.04427	3	0.00175	42	2755	3	1383
True	B	11	0	0	24	1	595	82	-1273	137	[560,49,652,116]	98.82	0.9353	4	3	143	0.05912	13	0.01174	0	0	0	0	13	1597	0	NaN
True	B	11	0	0	24	2	519	90	-1296	126	[479,50,568,185]	77.13	0.9434	5	4	102	0.06648	8	0.009259	0	0	0	0	8	2024	0	NaN
True	B	11	0	0	24	3	213	88	-1391	134	[185,67,235,111]	52.85	0.9408	6	5	130	0.1497	11	0.01858	37	0.03932	3	0.003058	11	2469	3	1351
True	B	11	0	0	24	4	459	110	-1314	125	[424,79,498,171]	139.8	0.9162	7	6	444	0.1389	42	0.02682	0	0	0	0	42	3869	0	NaN
True	B	11	0	0	24	5	238	175	-1380	109	[191,124,296,221]	104.4	0.9371	8	7	234	0.1418	21	0.01795	26	0.002044	2	0.0003771	21	2994	2	505.5
True	B	11	0	0	24	6	453	206	-1317	98	[421,180,483,248]	84.81	0.9524	9	8	176	0.1133	15	0.01579	0	0	0	0	15	2384	0	NaN
True	B	11	0	0	24	7	408	225	-1330	93	[380,193,445,261]	117.5	0.9205	10	9	360	0.1062	36	0.02736	0	0	0	0	36	4763	0	NaN
True	B	11	0	0	24	8	179	226	-1399	94	[136,171,221,267]	103.7	0.8401	11	10	221	0.1483	19	0.01635	12	0.003268	1	0.0002541	19	2723	1	2083
True	B	11	0	0	24	9	341	249	-1352	86	[309,215,375,297]	123.6	0.9144	12	11	406	0.156	36	0.02599	46	0.00626	4	0.002247	36	3724	4	747.3
True	B	11	0	0	24	10	254	256	-1379	85	[211,223,280,289]	56.87	0.8924	13	12	59	0.1057	5	0.007849	12	0.000346	1	0.000499	5	2161	1	298.8
True	B	11	0	0	24	11	431	277	-1326	77	[392,242,463,326]	124.6	0.9526	14	13	414	0.1494	39	0.02794	13	0.001809	1	0.0004902	39	4943	1	336.9
True	B	11	0	0	24	12	498	281	-1304	75	[469,237,530,340]	132.4	0.8586	15	14	378	0.16	33	0.02225	61	0.02237	5	0.001735	33	3376	5	1081
True	B	11	0	0	24	13	209	286	-1391	75	[179,251,239,324]	118.6	0.9004	16	15	349	0.1737	29	0.02184	0	0	0	0	29	3344	0	NaN
True	B	11	0	0	24	14	371	290	-1343	73	[333,254,399,332]	115.9	0.9391	17	16	386	0.1633	35	0.02696	10	0.0002678	1	0.0006112	35	3431	1	294.3
True	B	11	0	0	24	15	150	293	-1410	92	[109,105,186,340]	101.1	0.9573	18	17	114	0.03432	12	0.0106	0	0	0	0	12	1559	0	NaN
True	B	11	0	0	24	16	295	330	-1364	64	[270,292,327,365]	118.1	0.9407	19	18	310	0.1258	28	0.02116	49	0.08472	5	0.00455	28	3723	5	1908
True	B	11	0	0	24	17	239	324	-1381	62	[211,292,270,375]	107.1	0.8887	20	19	307	0.1658	27	0.0225	59	0.06944	5	0.003075	27	3915	5	1855
True	B	11	0	0	24	18	145	359	-1409	54	[113,320,190,398]	44.64	0.8627	21	20	35	0.02732	3	0.006	26	0.008912	3	0.0009355	3	1094	3	993.7
True	B	11	0	0	24	19	408	369	-1331	51	[378,327,443,401]	103	0.8938	22	21	283	0.1196	26	0.02253	26	0.03553	2	0.0009515	26	4077	2	2203
True	B	11	0	0	24	20	247	392	-1379	44	[221,361,271,422]	77.4	0.8268	23	22	182	0.1827	15	0.0173	13	0.02079	1	0.000788	15	4126	1	2193
True	B	11	0	0	24	21	347	402	-1350	42	[314,370,376,428]	126.5	0.9521	24	23	366	0.1681	32	0.02258	0	0	0	0	32	4565	0	NaN
True	B	11	0	0	24	22	302	420	-1362	36	[278,388,332,448]	85.25	0.9041	26	24	250	0.1383	22	0.02304	24	0.03417	2	0.001606	22	3726	2	2123
True	B	11	0	0	24	23	488	446	-1307	28	[452,421,517,477]	77.58	0.9142	27	25	156	0.149	13	0.01496	26	0.03675	2	0.001268	13	2642	2	2405
True	B	11	0	0	24	24	190	452	-1397	26	[145,387,227,517]	194.8	0.8109	28	26	496	0.1537	42	0.01925	31	0.01628	3	0.0007669	42	4238	3	1904
True	B	11	0	0	24	25	328	459	-1355	24	[305,432,363,490]	66.6	0.755	29	27	13	0.01155	1	0.00134	0	0	0	0	1	1166	0	NaN
True	B	11	0	0	24	26	476	491	-1309	14	[437,458,523,527]	164.8	0.8249	30	28	599	0.1726	56	0.03034	39	0.04436	3	0.001744	56	4459	3	1578
True	B	11	0	0	24	27	605	494	-1272	13	[571,458,642,532]	128.3	0.9426	31	29	434	0.1572	40	0.02784	11	0.0001843	1	0.0004751	40	4352	1	331.9
True	B	11	0	0	24	28	355	499	-1346	12	[324,470,392,529]	100.5	0.848	32	30	255	0.139	22	0.01954	53	0.02975	6	0.004121	22	3206	6	1353
True	B	11	0	0	24	29	233	509	-1385	6	[189,464,263,568]	90.7	0.8456	33	31	237	0.1743	21	0.02067	22	0.01516	2	0.0006398	21	3167	2	1402
True	B	11	0	0	24	30	154	541	-1407	2	[115,465,206,591]	47.31	1.01	34	32	157	0.1794	13	0.02453	18	0.004075	2	0.0002815	13	3006	2	1045
True	B	11	0	0	24	31	357	546	-1346	-2	[330,523,387,570]	55.97	0.8959	35	33	116	0.1868	10	0.01595	25	0.002322	3	0.002311	10	3312	3	1046
True	B	11	0	0	24	32	406	547	-1331	-3	[387,522,426,574]	91.15	0.9504	36	34	167	0.1512	14	0.01371	23	0.102	2	0.006211	14	3742	2	2315
True	B	11	0	0	24	33	458	561	-1317	-7	[422,531,487,593]	145.2	0.9137	37	35	377	0.1292	35	0.02151	26	0.05596	2	0.001733	35	4522	2	2585
True	B	11	0	0	24	34	583	560	-1279	-6	[547,529,615,593]	111.9	0.966	38	36	392	0.1523	35	0.02791	0	0	0	0	35	5171	0	NaN
True	B	11	0	0	24	35	263	564	-1373	-8	[234,539,296,590]	100.9	0.9663	39	37	271	0.1347	25	0.02212	13	0.05668	1	0.0008368	25	4041	1	3346
True	B	11	0	0	24	36	613	594	-1269	-15	[582,543,640,628]	81.06	0.907	40	38	226	0.1871	20	0.02203	28	0.001946	4	0.002017	20	4961	4	806.7
True	B	11	0	0	24	37	460	616	-1316	-23	[423,588,487,647]	111	0.9158	41	39	308	0.172	27	0.02172	13	0.0392	1	0.0007067	27	4618	1	3110
True	B	11	0	0	24	38	156	622	-1405	-30	[114,572,211,719]	64.28	0.9595	42	40	65	0.0888	5	0.006944	20	0.0001224	2	0.0002575	5	3034	2	493.2
True	B	11	0	0	24	39	208	679	-1389	-40	[177,626,247,731]	88.2	0.953	44	41	247	0.1656	21	0.02126	13	0.02125	1	0.0003164	21	3783	1	3142
True	B	11	0	0	24	40	324	707	-1355	-49	[279,663,381,748]	89.99	0.9233	45	42	153	0.1529	13	0.0129	138	0.05914	12	0.002685	13	2729	12	1870
True	B	11	0	0	24	41	400	699	-1329	-47	[377,680,459,718]	86.41	0.9113	46	43	118	0.1455	10	0.01033	11	0.001629	1	0.001017	10	3212	1	516.6
True	B	11	0	0	24	42	365	735	-1343	-59	[336,712,397,764]	68.47	0.8204	48	44	155	0.1952	12	0.01565	26	0.08034	2	0.002058	12	3909	2	3175
True	B	11	0	0	24	43	237	752	-1383	-63	[195,707,271,785]	101.8	0.9712	49	45	372	0.1608	34	0.02982	20	0.0003947	3	0.001193	34	5027	3	592.5
True	B	11	0	0	24	44	328	786	-1354	-73	[299,753,359,807]	75.79	0.8815	50	46	171	0.161	14	0.01649	39	0.1021	3	0.002735	14	3930	3	2481
True	B	11	0	0	24	45	284	818	-1365	-86	[239,763,354,890]	122.6	0.8414	51	47	395	0.1552	39	0.02841	60	0.006278	5	0.0008582	39	4729	5	851.9
True	B	11	0	0	24	46	149	804	-1406	-80	[111,757,204,857]	143.6	0.8513	52	48	324	0.1375	28	0.0174	13	0.0006981	1	0.0003057	28	3341	1	395.8
True	B	11	0	0	24	47	137	864	-1412	-100	[105,828,186,929]	95.07	0.7977	53	49	18	0.03093	2	0.001878	0	0	0	0	2	1786	0	NaN
True	B	11	0	0	24	48	295	889	-1371	-105	[211,845,352,928]	65.08	0.9182	54	50	128	0.1721	11	0.01509	0	0	0	0	11	3574	0	NaN
True	B	11	0	0	24	49	189	885	-1395	-104	[160,858,226,926]	108.6	0.9494	55	51	239	0.1775	20	0.01643	0	0	0	0	20	3223	0	NaN
True	B	11	0	0	24	50	168	937	-1404	-120	[121,902,204,974]	58.2	0.8483	56	52	51	0.08757	4	0.006135	74	0.007893	6	0.001715	4	3274	6	1011
True	B	11	0	0	24	51	313	956	-1359	-125	[275,916,347,998]	78.38	0.8511	57	53	78	0.006553	8	0.009112	25	0.01417	2	0.0006101	8	939.3	2	1494
True	B	11	0	0	24	52	150	994	-1405	-141	[115,959,221,1078]	69.72	0.8784	58	54	145	0.1181	12	0.01536	36	0.01014	3	0.0004446	12	3070	3	1646
True	B	11	0	0	24	53	247	988	-1380	-136	[216,960,278,1040]	97.13	0.9165	59	55	258	0.1809	22	0.02022	13	0.01576	1	0.0005165	22	3968	1	1518
True	B	11	0	0	24	54	379	1014	-1343	-142	[319,984,411,1047]	126.1	0.8774	60	56	440	0.1606	39	0.02762	26	0.04574	2	0.0008032	39	3770	2	3461
True	B	11	0	0	24	55	436	1028	-1322	-145	[389,973,474,1069]	115.9	0.9391	61	57	250	0.1811	22	0.01695	52	0.01963	4	0.001259	22	3428	4	900.3
True	B	11	0	0	24	56	190	1043	-1396	-151	[157,1009,240,1078]	129.7	0.9319	62	58	419	0.1501	38	0.02615	0	0	0	0	38	3362	0	NaN
True	B	11	0	0	24	57	323	1053	-1354	-154	[294,1025,367,1078]	123.2	0.973	63	59	343	0.1487	30	0.02174	0	0	0	0	30	3709	0	NaN
True	B	11	0	0	24	58	478	48	-1311	147	[443,11,511,85]	135.4	0.9992	66	61	246	0.1148	20	0.01318	26	0.02443	2	0.001075	20	2974	2	1593
True	B	11	0	0	24	59	593	421	-1275	34	[540,384,652,466]	178.4	0.9801	67	62	596	0.1524	55	0.02753	13	0.002421	1	0.0002518	55	4285	1	496.7
True	B	11	0	0	24	60	388	447	-1337	26	[331,402,434,496]	257.2	0.8639	68	63	818	0.1586	73	0.02534	13	0.01316	1	0.0004243	73	4204	1	1458
True	B	11	0	0	24	61	301	631	-1363	-28	[258,595,340,666]	150	0.894	69	64	289	0.1979	23	0.01369	13	0.02166	1	0.0004817	23	3011	1	2192
True	B	11	0	0	24	62	408	752	-1330	-62	[365,702,453,787]	145.3	0.9694	70	65	421	0.1473	37	0.02273	73	0.02317	7	0.002475	37	4872	7	1259
True	B	11	0	0	24	63	216	816	-1388	-83	[181,769,258,856]	166.9	1.006	71	66	450	0.1753	38	0.02032	0	0	0	0	38	3688	0	NaN
True	B	11	0	0	24	64	286	1019	-1368	-144	[249,985,320,1059]	142.6	0.9755	72	67	614	0.1696	56	0.03507	38	0.03149	3	0.001694	56	3519	3	1679
True	B	11	0	0	25	1	708	593	-596	-16	[675,557,744,623]	129.8	0.9663	1	1	431	0.142	42	0.02889	13	0.0115	1	0.0005672	42	3892	1	1687
True	B	11	0	0	25	2	335	725	-707	-56	[312,695,358,754]	75.97	0.9461	2	2	236	0.1268	23	0.02703	26	0.01553	2	0.001972	23	3805	2	587.5
True	B	11	0	0	26	1	1048	572	798	-10	[1015,526,1078,610]	141.8	0.9237	3	2	351	0.1136	30	0.01889	39	0.01078	3	0.001538	30	1601	3	585.9
True	B	11	0	0	26	2	971	648	774	-31	[930,619,1003,676]	141.7	0.9233	4	3	392	0.1579	35	0.02205	13	0.04502	1	0.0008123	35	3515	1	3036
True	B	11	0	0	26	3	946	586	767	-14	[905,549,986,624]	179.3	0.9906	5	4	528	0.1627	48	0.0239	26	0.02058	2	0.0007788	48	3435	2	1840
True	B	11	0	0	27	1	425	693	1258	-46	[399,664,457,723]	87.13	0.9358	1	1	309	0.1403	28	0.02869	0	0	0	0	28	4123	0	NaN
True	B	11	0	0	27	2	517	707	1286	-52	[481,674,555,752]	141.9	0.956	2	2	284	0.1096	28	0.01762	13	0.003245	1	0.000578	28	3621	1	654.9
True	B	11	0	0	27	3	957	974	1417	-128	[928,939,984,1000]	89.09	0.9481	3	3	237	0.1596	20	0.02004	13	0.02562	1	0.0007386	20	3142	1	1922
True	B	11	0	0	27	4	37	524	1140	4	[1,475,78,565]	129.9	0.9846	4	4	311	0.1712	26	0.01787	24	0.0006863	2	0.0008302	26	2176	2	265.3
True	B	11	0	0	27	5	554	851	1297	-95	[525,822,587,888]	168.7	0.9879	5	5	486	0.1405	45	0.02381	21	0.01059	2	0.001669	45	3367	2	1913
True	B	11	0	0	29	1	930	268	440	-241	[900,226,961,304]	129.4	0.9222	1	1	339	0.1595	30	0.0207	26	0.01017	2	0.001087	30	3476	2	598.5
True	B	11	0	0	29	2	203	859	223	-420	[158,823,251,891]	175.7	0.9421	2	2	207	0.06892	18	0.009146	0	0	0	0	18	1137	0	NaN
True	B	11	0	0	30	1	86	204	-458	-223	[57,175,120,237]	111.9	0.9952	1	1	355	0.1956	30	0.02392	13	0.02428	1	0.0006515	30	2847	1	2384
True	B	11	0	0	30	2	33	128	-473	-201	[1,82,75,177]	132	0.9848	2	2	442	0.1411	40	0.02705	13	0.007503	1	0.0003937	40	2437	1	906.5
True	B	11	0	0	32	1	158	49	-1406	-504	[107,1,222,147]	150.9	0.7352	1	1	0	0	0	0	0	0	0	0	0	NaN	0	NaN
True	B	11	0	0	32	2	449	39	-1316	-495	[420,1,503,71]	134.7	0.8967	2	2	440	0.1148	42	0.02783	47	0.03311	4	0.001993	42	4361	4	1470
True	B	11	0	0	32	3	498	60	-1304	-503	[460,31,539,98]	96.59	0.9422	3	3	194	0.104	17	0.01571	0	0	0	0	17	2938	0	NaN
True	B	11	0	0	32	4	223	79	-1388	-512	[174,40,258,138]	124.2	0.9334	4	4	396	0.1204	39	0.02804	57	0.02487	5	0.001481	39	4047	5	1236
True	B	11	0	0	32	5	414	70	-1330	-506	[388,39,442,102]	99.09	0.9465	5	5	254	0.109	23	0.02072	37	0.04561	3	0.002324	23	3863	3	1496
True	B	11	0	0	32	6	290	92	-1367	-513	[260,72,321,115]	90.79	0.9183	6	6	274	0.1225	27	0.02655	13	0.08635	1	0.001961	27	3926	1	4174
True	B	11	0	0	32	7	533	101	-1295	-514	[501,70,555,128]	80.34	0.955	7	7	187	0.1501	15	0.01667	22	0.03459	2	0.001689	15	3466	2	1840
True	B	11	0	0	32	8	341	91	-1353	-514	[308,67,366,135]	105.9	0.8743	8	8	361	0.1355	34	0.02867	39	0.04523	3	0.002268	34	3923	3	1521
True	B	11	0	0	32	9	281	160	-1368	-531	[249,117,314,192]	112.3	0.9136	9	9	380	0.1563	32	0.02544	52	0.0481	4	0.00192	32	3759	4	2042
True	B	11	0	0	32	10	162	195	-1402	-544	[114,140,237,266]	127	0.8814	10	10	374	0.1549	33	0.02319	0	0	0	0	33	3454	0	NaN
True	B	11	0	0	32	11	306	233	-1361	-556	[276,206,344,269]	125.8	0.9577	11	11	426	0.1786	38	0.02697	39	0.05556	3	0.002387	38	3683	3	2072
True	B	11	0	0	32	12	254	247	-1376	-560	[222,208,290,292]	105	0.9494	12	12	244	0.1283	21	0.01786	0	0	0	0	21	3549	0	NaN
True	B	11	0	0	32	13	378	261	-1338	-564	[339,217,428,312]	140.3	0.9667	13	13	420	0.161	37	0.02354	26	0.02582	2	0.0006365	37	3906	2	2327
True	B	11	0	0	32	14	443	256	-1321	-561	[408,221,477,295]	128.7	0.953	14	14	376	0.1607	32	0.02219	13	0.005794	1	0.00052	32	3322	1	901.2
True	B	11	0	0	32	15	210	274	-1390	-568	[180,243,244,313]	57.67	0.8544	15	15	31	0.005083	3	0.004644	0	0	0	0	3	1029	0	NaN
True	B	11	0	0	32	16	312	292	-1358	-572	[280,259,364,336]	118.2	0.875	16	16	436	0.1587	40	0.03021	75	0.0603	7	0.002727	40	5050	7	2174
True	B	11	0	0	32	17	527	292	-1295	-571	[499,257,554,322]	100.3	0.8387	17	17	345	0.133	33	0.02939	65	0.03603	5	0.003695	33	4467	5	892
True	B	11	0	0	32	18	242	321	-1382	-581	[202,292,271,351]	105.8	0.9256	18	18	367	0.171	33	0.02785	13	0.009048	1	0.0006988	33	4376	1	1192
True	B	11	0	0	32	19	447	321	-1319	-581	[418,294,479,351]	85.08	0.9129	19	19	214	0.1317	20	0.02099	110	0.01168	10	0.006545	20	4125	10	513.1
True	B	11	0	0	32	20	160	326	-1407	-576	[110,216,209,379]	118.4	0.8173	20	20	228	0.1065	21	0.01584	26	0.005214	2	0.0002469	21	2550	2	1495
True	B	11	0	0	32	21	502	333	-1302	-584	[475,305,546,364]	101.1	0.8843	21	21	259	0.151	23	0.0203	33	0.05584	3	0.002239	23	4100	3	1646
True	B	11	0	0	32	22	262	370	-1374	-595	[233,321,290,407]	88.56	0.905	22	22	246	0.1344	21	0.02117	13	0.03314	1	0.0004744	21	3368	1	3883
True	B	11	0	0	32	23	203	373	-1391	-596	[175,339,239,401]	129.6	0.9483	23	23	344	0.148	30	0.02066	78	0.06489	8	0.006531	30	3469	8	1115
True	B	11	0	0	32	24	485	394	-1309	-602	[448,361,517,424]	60.44	0.8899	24	24	97	0.1418	8	0.01182	29	0.0008423	3	0.001255	8	3557	3	547.3
True	B	11	0	0	32	25	357	409	-1345	-607	[329,381,397,437]	100.9	0.9276	25	25	272	0.135	25	0.02212	13	0.008685	1	0.0005984	25	4218	1	965.4
True	B	11	0	0	32	26	414	417	-1328	-609	[386,380,449,448]	98.91	0.9358	26	26	321	0.1542	30	0.02708	12	0.001779	1	0.0005724	30	4141	1	658.2
True	B	11	0	0	32	27	155	441	-1408	-617	[116,363,192,534]	60.88	0.9544	27	27	81	0.08743	7	0.01026	0	0	0	0	7	1848	0	NaN
True	B	11	0	0	32	28	473	467	-1312	-626	[446,441,503,500]	125.6	0.9748	28	28	372	0.1603	33	0.02345	26	0.061	2	0.002581	33	3882	2	1605
True	B	11	0	0	32	29	426	476	-1326	-627	[403,443,450,508]	99.98	0.9417	29	29	236	0.1232	21	0.01875	13	0.01534	1	0.0007337	21	5011	1	949
True	B	11	0	0	32	30	306	476	-1362	-628	[274,449,336,518]	103.2	0.9306	30	30	302	0.1114	29	0.02509	25	0.003701	2	0.001262	29	4227	2	439.2
True	B	11	0	0	32	31	377	472	-1339	-628	[350,429,411,536]	150	0.9385	31	31	394	0.155	35	0.02083	13	0.002717	1	0.0004359	35	3986	1	519.3
True	B	11	0	0	32	32	537	502	-1293	-634	[505,475,570,530]	81.77	0.9323	32	32	271	0.1848	24	0.0262	21	0.001268	2	0.001401	24	4294	2	456.7
True	B	11	0	0	32	33	318	514	-1355	-638	[298,475,362,555]	105.3	0.8795	33	33	334	0.1733	30	0.02545	21	0.002539	2	0.001587	30	4083	2	645.8
True	B	11	0	0	32	34	199	512	-1395	-640	[126,487,243,549]	66.51	0.8852	34	34	116	0.1186	9	0.01208	61	0.005661	5	0.001571	9	2518	5	1036
True	B	11	0	0	32	35	451	522	-1319	-641	[413,497,480,550]	105.3	0.9325	35	35	295	0.1414	26	0.02203	13	0.03497	1	0.0007987	26	3367	1	2584
True	B	11	0	0	32	36	354	531	-1347	-645	[329,499,378,574]	86.33	0.8915	36	36	236	0.1835	20	0.02068	0	0	0	0	20	3957	0	NaN
True	B	11	0	0	32	37	184	551	-1398	-649	[146,527,214,582]	96.95	0.9958	37	37	303	0.1515	26	0.02394	26	0.05802	2	0.002222	26	3370	2	2119
True	B	11	0	0	32	38	438	572	-1321	-655	[405,527,492,604]	142.3	0.9257	38	38	429	0.1472	39	0.02447	52	0.03672	4	0.00169	39	5073	4	1392
True	B	11	0	0	32	39	271	581	-1373	-659	[232,549,302,619]	122.7	0.9706	39	39	368	0.1996	31	0.02256	0	0	0	0	31	3804	0	NaN
True	B	11	0	0	32	40	325	600	-1356	-662	[297,549,354,638]	111.5	0.9361	40	40	328	0.1579	29	0.02322	13	0.005592	1	0.0004634	29	4092	1	1034
True	B	11	0	0	32	41	511	629	-1300	-671	[483,582,537,667]	84.09	0.9371	41	41	263	0.1394	24	0.02548	22	0.006744	2	0.00101	24	3885	2	1494
True	B	11	0	0	32	42	431	630	-1323	-674	[403,594,461,674]	133.4	0.947	42	42	457	0.169	41	0.02744	26	0.03163	2	0.001183	41	4409	2	1649
True	B	11	0	0	32	43	290	656	-1366	-680	[250,625,329,692]	111.3	0.9004	43	43	336	0.1383	33	0.02646	31	0.01118	3	0.001492	33	4854	3	1627
True	B	11	0	0	32	44	227	668	-1384	-683	[196,620,257,708]	118.6	0.9699	44	44	355	0.1487	32	0.0241	13	0.01777	1	0.0004537	32	4331	1	2181
True	B	11	0	0	32	45	161	640	-1406	-678	[114,578,206,722]	205.1	0.7224	45	45	26	0.004981	2	0.0008703	0	0	0	0	2	1630	0	NaN
True	B	11	0	0	32	46	295	709	-1369	-698	[238,686,322,746]	111	0.9611	46	46	404	0.1588	38	0.03057	24	0.03584	2	0.001147	38	3781	2	1672
True	B	11	0	0	32	47	400	706	-1334	-696	[370,683,425,731]	97.84	0.9493	47	47	267	0.154	24	0.0219	47	0.05422	4	0.004608	24	3143	4	1261
True	B	11	0	0	32	48	350	741	-1349	-706	[311,704,388,780]	138.9	0.9206	48	48	431	0.1427	39	0.02506	6	0	1	0.0004219	39	4091	1	276.7
True	B	11	0	0	32	49	419	750	-1326	-708	[391,722,454,776]	75.26	0.9637	49	49	205	0.1369	19	0.02254	0	0	0	0	19	3160	0	NaN
True	B	11	0	0	32	50	156	752	-1406	-711	[125,720,190,802]	65.08	0.8235	50	50	65	0.1381	5	0.006859	143	0.02527	13	0.004141	5	2405	13	1030
True	B	11	0	0	32	51	477	772	-1309	-715	[449,747,510,798]	100.9	0.9003	51	51	288	0.1335	25	0.02212	13	0.04162	1	0.0008953	25	2888	1	2512
True	B	11	0	0	32	52	223	773	-1386	-716	[193,744,254,803]	70.26	0.9256	52	52	204	0.173	17	0.0216	13	0.006925	1	0.0005543	17	3414	1	817.3
True	B	11	0	0	32	53	438	790	-1321	-721	[415,760,466,815]	85.16	0.9547	53	53	288	0.1871	25	0.02621	0	0	0	0	25	4067	0	NaN
True	B	11	0	0	32	54	158	820	-1404	-728	[123,776,205,853]	99.36	0.948	54	54	186	0.0885	17	0.01527	0	0	0	0	17	1806	0	NaN
True	B	11	0	0	32	55	408	811	-1328	-729	[376,787,456,849]	129.3	0.8608	55	55	399	0.1654	36	0.02486	0	0	0	0	36	3555	0	NaN
True	B	11	0	0	32	56	477	826	-1310	-733	[451,797,504,866]	93.73	0.9557	56	56	295	0.1701	27	0.02571	31	0.006849	3	0.002	27	3499	3	889.4
True	B	11	0	0	32	57	314	821	-1357	-731	[297,806,344,844]	79.9	0.7918	57	57	191	0.1848	17	0.01899	0	0	0	0	17	3656	0	NaN
True	B	11	0	0	32	58	401	851	-1334	-739	[372,825,432,876]	106	0.945	58	58	333	0.1658	30	0.02527	26	0.06595	2	0.003247	30	3776	2	2141
True	B	11	0	0	32	59	201	850	-1394	-740	[171,821,224,889]	89	0.8888	59	59	405	0.1252	38	0.03811	13	0.03346	1	0.0007305	38	5090	1	2849
True	B	11	0	0	32	60	378	889	-1339	-752	[353,864,407,928]	85.97	0.982	61	60	335	0.1539	30	0.03115	13	0.03722	1	0.0007764	30	4117	1	3080
True	B	11	0	0	32	61	492	887	-1306	-751	[454,863,520,916]	84.81	0.9524	62	61	207	0.1594	18	0.01895	0	0	0	0	18	3419	0	NaN
True	B	11	0	0	32	62	155	893	-1408	-752	[117,844,200,948]	57.04	0.9569	64	62	136	0.07869	12	0.01878	0	0	0	0	12	2564	0	NaN
True	B	11	0	0	32	63	346	913	-1348	-759	[321,888,387,946]	96.5	0.8357	65	63	323	0.1341	30	0.02775	19	0.0009598	2	0.001751	30	4170	2	411.2
True	B	11	0	0	32	64	318	942	-1358	-767	[286,917,353,969]	86.95	0.9556	66	64	187	0.1652	16	0.01643	13	0.03251	1	0.0007072	16	4462	1	2345
[truncated: 15,016 more rows]
[truncated: 8 more columns]
